# Supplementary material for: Epigenetic inheritance of DNA methylation changes in fish living in hydrogen sulfide–rich springs
Source: PubMed Central journal article supplement — Proc Natl Acad Sci U S A. 2021 Jun 14;118(26):e2014929118. doi: 10.1073/pnas.2014929118 (PMC8255783; doi:10.1073/pnas.2014929118), 2021-06-14
Supplement: pnas.2014929118.sapp.pdf [file pnas.2014929118.sapp.pdf]

# **Epigenetic Inheritance of DNA Methylation Changes in Fish Living in Hydrogen Sulfide-rich Springs**

Joanna L. Kelley<sup>1\*</sup>, Michael Tobler<sup>2</sup>, Daniel Beck<sup>1</sup>, Nicholas Barts<sup>2</sup>, Ingrid Sadler-Riggleman<sup>1</sup>,  
Corey R. Quackenbush<sup>1</sup>, Lenin Arias Rodriguez<sup>3</sup>, Michael K. Skinner<sup>1,4\*</sup>

<sup>1</sup> School of Biological Sciences  
Washington State University  
Pullman, WA, USA

<sup>2</sup> Division of Biology  
Kansas State University  
Manhattan, KS, USA

<sup>3</sup> División Académica de Ciencias Biológicas  
Universidad Juárez Autónoma de Tabasco  
Villahermosa, Tabasco, México

<sup>4</sup> Center for Reproductive Biology  
Washington State University  
Pullman, WA, USA

**SUPPLEMENTAL MATERIAL**

## Supplemental Figure and Table Legends

**Supplemental Figure S1.** Proportion of mean raw read number in the two groups for genomic windows with an edgeR p-value  $p < 10^{-7}$ . The ratio presented represents an increase or decrease in methylation for DMR, with no change in the 0.5 range. (A) Male sulfidic versus nonsulfidic wild population comparison. (B) Female sulfidic versus nonsulfidic wild population.

**Supplemental Table S1.** DMR list and characteristics DMR list SFL versus NFL  $p < 10^{-7}$ . DMR name, chromosome, genomic start and stop nucleotides, length (bp), number significant windows, CpG number and density, as well as annotation of associated genes within 10 kb including gene symbol and gene functional categories presented.

**Supplemental Table S2.** DMR list and characteristics. DMR list SFW versus NFW  $p < 10^{-7}$ . DMR name, chromosome, genomic start and stop nucleotides, length (bp), number significant windows, CpG number and density, as well as annotation of associated genes within 10 kb including gene symbol and gene functional categories presented.

**Supplemental Table S3.** DMR list and characteristics. DMR list SML versus NML  $p < 10^{-7}$ . DMR name, chromosome, genomic start and stop nucleotides, length (bp), number significant windows, CpG number and density, as well as annotation of associated genes within 10 kb including gene symbol and gene functional categories presented.

**Supplemental Table S4.** DMR list and characteristics. DMR list SMW versus NMW  $p < 10^{-7}$ .

DMR name, chromosome, genomic start and stop nucleotides, length (bp), number significant windows, CpG number and density, as well as annotation of associated genes within 10 kb including gene symbol and gene functional categories presented.

**Supplemental Table S5.** The 94 DMRs that overlap among all comparisons list and gene associations.

**A** Male sulfidic vs. non-sulfidic wild

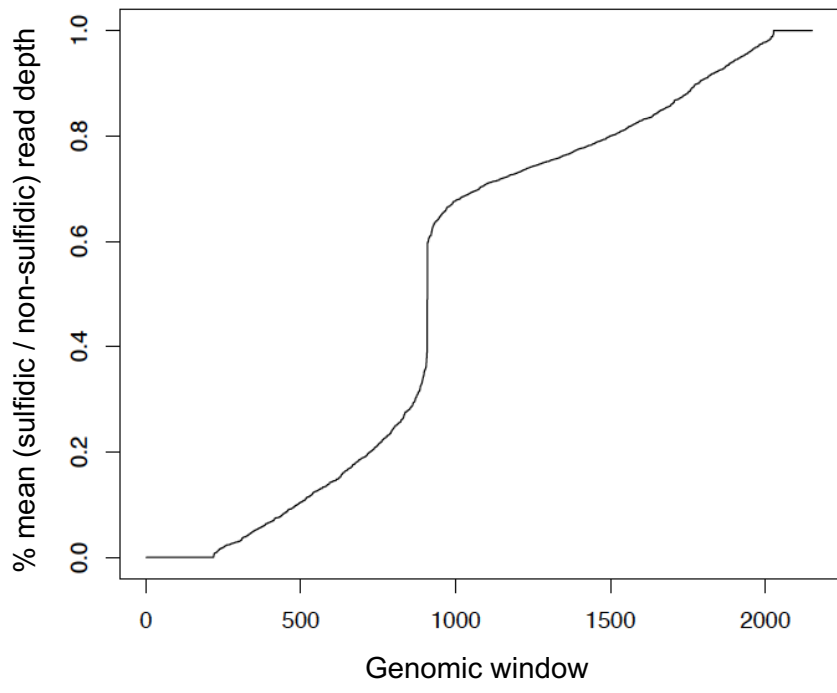

**B** Female sulfidic vs. non-sulfidic wild

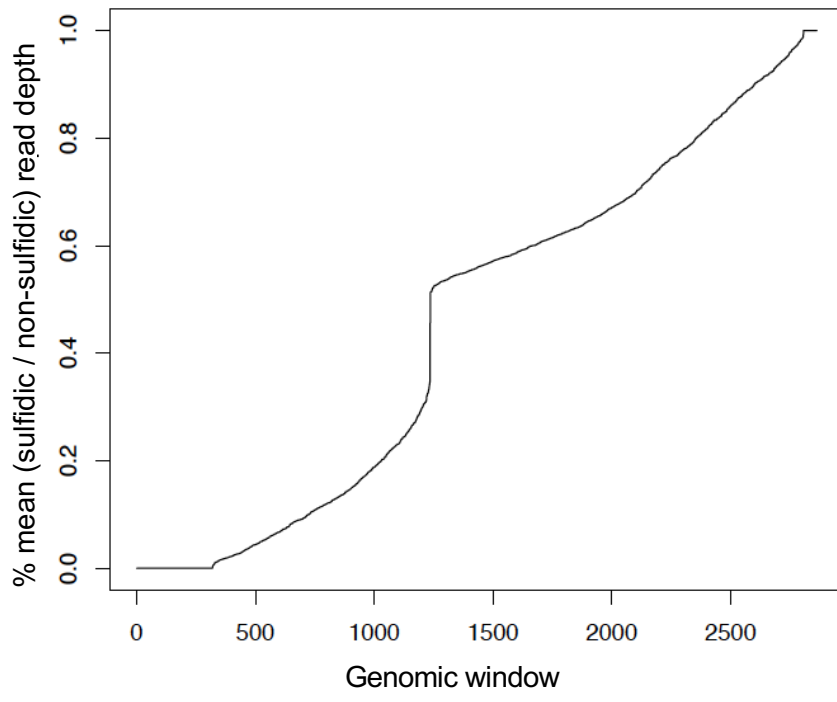

**Supplemental Table S1**  
**DMR List SFL vs NFL p<1e-07**

| DMR Name                  | Chr            | Start   | Stop    | Length | # Sig Win | minP     | CpG # | CpG Density | Gene Annotation                                  | Gene Category |
|---------------------------|----------------|---------|---------|--------|-----------|----------|-------|-------------|--------------------------------------------------|---------------|
| DMRNW_015094511.1:760301  | NW_015094511.1 | 760301  | 760700  | 400    | 1         | 1.51E-12 | 11    | 2.75        | rbfox3                                           |               |
| DMRNW_015094511.1:778701  | NW_015094511.1 | 778701  | 779600  | 900    | 2         | 2.26E-14 | 9     | 1           | rbfox3                                           |               |
| DMRNW_015094511.1:875701  | NW_015094511.1 | 875701  | 877400  | 1700   | 1         | 9.95E-09 | 79    | 4.647       | rbfox3                                           |               |
| DMRNW_015094511.1:1216001 | NW_015094511.1 | 1216001 | 1220700 | 4700   | 1         | 4.04E-08 | 156   | 3.319       | rbfox3;LOC106914683                              |               |
| DMRNW_015094511.1:1367001 | NW_015094511.1 | 1367001 | 1372700 | 5700   | 1         | 2.36E-17 | 132   | 2.316       |                                                  |               |
| DMRNW_015094512.1:968601  | NW_015094512.1 | 968601  | 969900  | 1300   | 2         | 1.99E-29 | 18    | 1.385       | caln1                                            | Signaling     |
| DMRNW_015094513.1:809501  | NW_015094513.1 | 809501  | 810700  | 1200   | 1         | 1.07E-08 | 59    | 4.917       | LOC106925924;LOC106927274                        |               |
| DMRNW_015094513.1:850001  | NW_015094513.1 | 850001  | 850200  | 200    | 1         | 4.63E-08 | 22    | 11          | LOC106924831                                     |               |
| DMRNW_015094516.1:124301  | NW_015094516.1 | 124301  | 127500  | 3200   | 2         | 5.83E-21 | 46    | 1.438       |                                                  |               |
| DMRNW_015094518.1:628801  | NW_015094518.1 | 628801  | 631100  | 2300   | 3         | 4.73E-10 | 54    | 2.348       | LOC106914001                                     |               |
| DMRNW_015094521.1:662001  | NW_015094521.1 | 662001  | 664000  | 2000   | 4         | 3.66E-10 | 22    | 1.1         | LOC106915557;LOC106915571                        |               |
| DMRNW_015094521.1:796201  | NW_015094521.1 | 796201  | 797300  | 1100   | 2         | 4.39E-13 | 24    | 2.182       | LOC106915595                                     |               |
| DMRNW_015094522.1:153201  | NW_015094522.1 | 153201  | 154000  | 800    | 1         | 8.63E-12 | 24    | 3           | LOC106915761                                     |               |
| DMRNW_015094523.1:244201  | NW_015094523.1 | 244201  | 244800  | 600    | 3         | 1.37E-10 | 26    | 4.333       |                                                  |               |
| DMRNW_015094523.1:250401  | NW_015094523.1 | 250401  | 253600  | 3200   | 2         | 5.15E-21 | 46    | 1.438       |                                                  |               |
| DMRNW_015094523.1:557701  | NW_015094523.1 | 557701  | 563400  | 5700   | 1         | 6.79E-09 | 138   | 2.421       | LOC106916177                                     |               |
| DMRNW_015094523.1:646901  | NW_015094523.1 | 646901  | 647900  | 1000   | 1         | 2.01E-10 | 38    | 3.8         | LOC106916288                                     |               |
| DMRNW_015094523.1:680201  | NW_015094523.1 | 680201  | 683400  | 3200   | 1         | 8.64E-10 | 129   | 4.031       | LOC106916288                                     |               |
| DMRNW_015094523.1:774801  | NW_015094523.1 | 774801  | 775500  | 700    | 1         | 4.05E-08 | 13    | 1.857       | LOC106916297                                     |               |
| DMRNW_015094524.1:268001  | NW_015094524.1 | 268001  | 271200  | 3200   | 1         | 1.72E-08 | 33    | 1.031       | LOC106916498                                     |               |
| DMRNW_015094526.1:49801   | NW_015094526.1 | 49801   | 55000   | 5200   | 1         | 7.72E-09 | 161   | 3.096       | LOC106917146                                     |               |
| DMRNW_015094526.1:602101  | NW_015094526.1 | 602101  | 606800  | 4700   | 2         | 9.19E-10 | 123   | 2.617       |                                                  |               |
| DMRNW_015094529.1:732501  | NW_015094529.1 | 732501  | 732800  | 300    | 2         | 7.62E-22 | 12    | 4           |                                                  |               |
| DMRNW_015094530.1:207501  | NW_015094530.1 | 207501  | 209100  | 1600   | 2         | 3.28E-10 | 31    | 1.938       | mid2                                             |               |
| DMRNW_015094532.1:1359101 | NW_015094532.1 | 1359101 | 1360700 | 1600   | 2         | 1.06E-08 | 16    | 1           | sh3rf3                                           |               |
| DMRNW_015094533.1:62901   | NW_015094533.1 | 62901   | 63400   | 500    | 1         | 9.44E-09 | 8     | 1.6         | LOC106918986                                     |               |
| DMRNW_015094533.1:219101  | NW_015094533.1 | 219101  | 220200  | 1100   | 1         | 6.08E-08 | 27    | 2.455       |                                                  |               |
| DMRNW_015094535.1:196301  | NW_015094535.1 | 196301  | 197800  | 1500   | 2         | 2.57E-10 | 37    | 2.467       | LOC106920206                                     |               |
| DMRNW_015094537.1:3401    | NW_015094537.1 | 3401    | 4000    | 600    | 1         | 2.66E-08 | 8     | 1.333       | LOC106920651                                     |               |
| DMRNW_015094538.1:682201  | NW_015094538.1 | 682201  | 684700  | 2500   | 2         | 7.86E-09 | 49    | 1.96        | nrg2                                             |               |
| DMRNW_015094539.1:727801  | NW_015094539.1 | 727801  | 729700  | 1900   | 1         | 3.07E-08 | 46    | 2.421       | LOC106922496                                     |               |
| DMRNW_015094540.1:201601  | NW_015094540.1 | 201601  | 203900  | 2300   | 3         | 1.05E-31 | 67    | 2.913       | LOC106922645                                     |               |
| DMRNW_015094540.1:406401  | NW_015094540.1 | 406401  | 408400  | 2000   | 1         | 5.49E-08 | 66    | 3.3         | LOC106922708;LOC106922755                        |               |
| DMRNW_015094542.1:21201   | NW_015094542.1 | 21201   | 23000   | 1800   | 1         | 5.34E-08 | 17    | 0.944       | LOC106923244                                     |               |
| DMRNW_015094544.1:106301  | NW_015094544.1 | 106301  | 106700  | 400    | 1         | 7.22E-08 | 14    | 3.5         |                                                  |               |
| DMRNW_015094544.1:412001  | NW_015094544.1 | 412001  | 416200  | 4200   | 1         | 3.22E-09 | 156   | 3.714       | lnx1                                             | Cytoskeleton  |
| DMRNW_015094545.1:566401  | NW_015094545.1 | 566401  | 568700  | 2300   | 1         | 1.97E-08 | 80    | 3.478       |                                                  |               |
| DMRNW_015094545.1:800701  | NW_015094545.1 | 800701  | 803800  | 3100   | 1         | 1.83E-09 | 84    | 2.71        | LOC106924438                                     |               |
| DMRNW_015094546.1:648901  | NW_015094546.1 | 648901  | 650700  | 1800   | 1         | 4.95E-13 | 30    | 1.667       | rassf1                                           | Signaling     |
| DMRNW_015094546.1:779501  | NW_015094546.1 | 779501  | 780000  | 500    | 2         | 1.41E-10 | 16    | 3.2         | cacna2d2                                         | Transport     |
| DMRNW_015094547.1:608801  | NW_015094547.1 | 608801  | 611600  | 2800   | 1         | 1.32E-09 | 175   | 6.25        | LOC106925558                                     |               |
| DMRNW_015094548.1:358001  | NW_015094548.1 | 358001  | 361600  | 3600   | 1         | 2.78E-08 | 105   | 2.917       | LOC106925676;LOC106925697                        |               |
| DMRNW_015094548.1:584801  | NW_015094548.1 | 584801  | 585700  | 900    | 4         | 9.16E-38 | 9     | 1           | drosha                                           | Transcription |
| DMRNW_015094548.1:731501  | NW_015094548.1 | 731501  | 732600  | 1100   | 1         | 4.69E-08 | 36    | 3.273       |                                                  |               |
| DMRNW_015094550.1:81001   | NW_015094550.1 | 81001   | 82600   | 1600   | 1         | 2.97E-08 | 66    | 4.125       | LOC106926179                                     |               |
| DMRNW_015094550.1:378101  | NW_015094550.1 | 378101  | 379300  | 1200   | 2         | 2.66E-17 | 52    | 4.333       | snx14                                            | Signaling     |
| DMRNW_015094550.1:752601  | NW_015094550.1 | 752601  | 753300  | 700    | 2         | 3.06E-15 | 7     | 1           |                                                  |               |
| DMRNW_015094551.1:445101  | NW_015094551.1 | 445101  | 445400  | 300    | 1         | 4.05E-11 | 0     | 0           | dlg3                                             | Unknown       |
| DMRNW_015094553.1:295801  | NW_015094553.1 | 295801  | 296100  | 300    | 2         | 4.11E-15 | 10    | 3.333       | LOC106927059                                     |               |
| DMRNW_015094553.1:509601  | NW_015094553.1 | 509601  | 510100  | 500    | 2         | 1.91E-11 | 46    | 9.2         | LOC106927163                                     |               |
| DMRNW_015094553.1:569801  | NW_015094553.1 | 569801  | 574400  | 4600   | 1         | 7.36E-08 | 175   | 3.804       | LOC106927163                                     |               |
| DMRNW_015094553.1:594601  | NW_015094553.1 | 594601  | 595700  | 1100   | 1         | 1.24E-09 | 26    | 2.364       | LOC106927163                                     |               |
| DMRNW_015094553.1:641901  | NW_015094553.1 | 641901  | 642900  | 1000   | 2         | 2.90E-14 | 16    | 1.6         | LOC106927177                                     |               |
| DMRNW_015094554.1:227901  | NW_015094554.1 | 227901  | 229100  | 1200   | 1         | 9.95E-08 | 57    | 4.75        | magi2                                            | Metabolism    |
| DMRNW_015094554.1:354301  | NW_015094554.1 | 354301  | 355100  | 800    | 1         | 7.26E-10 | 28    | 3.5         | sema3c                                           | Development   |
| DMRNW_015094554.1:477901  | NW_015094554.1 | 477901  | 479600  | 1700   | 1         | 3.49E-08 | 46    | 2.706       |                                                  |               |
| DMRNW_015094555.1:317601  | NW_015094555.1 | 317601  | 317900  | 300    | 1         | 2.80E-12 | 15    | 5           | myo16                                            | Cytoskeleton  |
| DMRNW_015094560.1:78501   | NW_015094560.1 | 78501   | 84700   | 6200   | 2         | 1.16E-11 | 265   | 4.274       | taf3                                             |               |
| DMRNW_015094561.1:24801   | NW_015094561.1 | 24801   | 28500   | 3700   | 1         | 6.63E-09 | 180   | 4.865       | kcnc2                                            | Metabolism    |
| DMRNW_015094562.1:141701  | NW_015094562.1 | 141701  | 142200  | 500    | 1         | 9.49E-09 | 7     | 1.4         |                                                  |               |
| DMRNW_015094562.1:143901  | NW_015094562.1 | 143901  | 145100  | 1200   | 4         | 3.64E-26 | 30    | 2.5         |                                                  |               |
| DMRNW_015094562.1:155801  | NW_015094562.1 | 155801  | 162900  | 7100   | 8         | 1.56E-13 | 132   | 1.859       | LOC106929794;LOC106929787;LOC106929769;trnan-guu |               |
| DMRNW_015094563.1:363201  | NW_015094563.1 | 363201  | 365700  | 2500   | 2         | 4.93E-13 | 42    | 1.68        | rom1                                             |               |
| DMRNW_015094563.1:518201  | NW_015094563.1 | 518201  | 519500  | 1300   | 1         | 1.14E-08 | 34    | 2.615       | LOC106930344                                     |               |
| DMRNW_015094565.1:553201  | NW_015094565.1 | 553201  | 556400  | 3200   | 2         | 6.73E-13 | 54    | 1.688       | ccdc73                                           |               |
| DMRNW_015094565.1:647001  | NW_015094565.1 | 647001  | 647400  | 400    | 1         | 1.79E-09 | 5     | 1.25        | LOC106931261                                     |               |
| DMRNW_015094567.1:977801  | NW_015094567.1 | 977801  | 978100  | 300    | 1         | 5.67E-08 | 11    | 3.667       |                                                  |               |

|                           |                |         |         |      |   |          |     |       |                                        |               |
|---------------------------|----------------|---------|---------|------|---|----------|-----|-------|----------------------------------------|---------------|
| DMRNW_015094568.1:140801  | NW_015094568.1 | 140801  | 141100  | 300  | 1 | 7.76E-11 | 3   | 1     |                                        |               |
| DMRNW_015094569.1:263701  | NW_015094569.1 | 263701  | 264500  | 800  | 1 | 6.98E-08 | 22  | 2.75  |                                        |               |
| DMRNW_015094569.1:305301  | NW_015094569.1 | 305301  | 306500  | 1200 | 1 | 1.07E-09 | 22  | 1.833 |                                        |               |
| DMRNW_015094572.1:57701   | NW_015094572.1 | 57701   | 59300   | 1600 | 2 | 1.22E-10 | 18  | 1.125 | LOC106933202                           |               |
| DMRNW_015094572.1:62601   | NW_015094572.1 | 62601   | 65000   | 2400 | 1 | 6.60E-09 | 54  | 2.25  | LOC106933156                           |               |
| DMRNW_015094573.1:229301  | NW_015094573.1 | 229301  | 232500  | 3200 | 8 | 3.54E-32 | 45  | 1.406 | LOC106933764                           |               |
| DMRNW_015094576.1:86101   | NW_015094576.1 | 86101   | 87500   | 1400 | 1 | 1.56E-10 | 72  | 5.143 | arfgef1                                | Translation   |
| DMRNW_015094576.1:454301  | NW_015094576.1 | 454301  | 454700  | 400  | 2 | 3.30E-10 | 25  | 6.25  | LOC106903321                           |               |
| DMRNW_015094577.1:193201  | NW_015094577.1 | 193201  | 194200  | 1000 | 1 | 3.49E-09 | 7   | 0.7   |                                        |               |
| DMRNW_015094577.1:322701  | NW_015094577.1 | 322701  | 327900  | 5200 | 1 | 1.93E-08 | 126 | 2.423 | suclg2                                 | Metabolism    |
| DMRNW_015094581.1:460501  | NW_015094581.1 | 460501  | 460700  | 200  | 1 | 1.74E-09 | 6   | 3     | LOC106904476                           |               |
| DMRNW_015094583.1:201     | NW_015094583.1 | 201     | 2500    | 2300 | 3 | 5.53E-12 | 57  | 2.478 |                                        |               |
| DMRNW_015094583.1:435901  | NW_015094583.1 | 435901  | 437800  | 1900 | 1 | 5.49E-11 | 29  | 1.526 | LOC106905396                           |               |
| DMRNW_015094584.1:508901  | NW_015094584.1 | 508901  | 512600  | 3700 | 1 | 2.08E-09 | 66  | 1.784 | LOC106905751;LOC106905714;LOC106905745 |               |
| DMRNW_015094584.1:620801  | NW_015094584.1 | 620801  | 622300  | 1500 | 1 | 1.11E-08 | 34  | 2.267 | gsap                                   | Receptor      |
| DMRNW_015094584.1:1118801 | NW_015094584.1 | 1118801 | 1119600 | 800  | 2 | 2.16E-10 | 3   | 0.375 |                                        |               |
| DMRNW_015094587.1:90601   | NW_015094587.1 | 90601   | 91500   | 900  | 1 | 8.71E-11 | 42  | 4.667 | LOC106906728                           |               |
| DMRNW_015094588.1:626501  | NW_015094588.1 | 626501  | 628800  | 2300 | 1 | 3.35E-08 | 37  | 1.609 | fibcd1                                 | Cytoskeleton  |
| DMRNW_015094590.1:68401   | NW_015094590.1 | 68401   | 68800   | 400  | 2 | 7.81E-09 | 23  | 5.75  | afap1l2;LOC106907472                   | Cytoskeleton  |
| DMRNW_015094591.1:160901  | NW_015094591.1 | 160901  | 166500  | 5600 | 1 | 6.80E-09 | 151 | 2.696 | LOC106907781;LOC106907790              |               |
| DMRNW_015094591.1:480501  | NW_015094591.1 | 480501  | 484200  | 3700 | 1 | 7.34E-10 | 90  | 2.432 | elp3                                   | Metabolism    |
| DMRNW_015094591.1:598201  | NW_015094591.1 | 598201  | 600100  | 1900 | 3 | 6.17E-10 | 28  | 1.474 | LOC106908015                           |               |
| DMRNW_015094592.1:53301   | NW_015094592.1 | 53301   | 54100   | 800  | 1 | 9.96E-08 | 72  | 9     |                                        |               |
| DMRNW_015094597.1:596601  | NW_015094597.1 | 596601  | 597200  | 600  | 2 | 4.86E-11 | 7   | 1.167 |                                        |               |
| DMRNW_015094598.1:195101  | NW_015094598.1 | 195101  | 197300  | 2200 | 1 | 4.47E-08 | 41  | 1.864 | fign                                   | Development   |
| DMRNW_015094599.1:619301  | NW_015094599.1 | 619301  | 619500  | 200  | 1 | 2.74E-08 | 2   | 1     |                                        |               |
| DMRNW_015094600.1:365201  | NW_015094600.1 | 365201  | 368700  | 3500 | 1 | 9.74E-08 | 82  | 2.343 | LOC106910644                           |               |
| DMRNW_015094602.1:500201  | NW_015094602.1 | 500201  | 500700  | 500  | 1 | 3.00E-08 | 9   | 1.8   | tmem121;LOC106911415                   |               |
| DMRNW_015094604.1:334701  | NW_015094604.1 | 334701  | 336100  | 1400 | 2 | 4.14E-18 | 42  | 3     |                                        |               |
| DMRNW_015094604.1:391801  | NW_015094604.1 | 391801  | 395600  | 3800 | 1 | 4.76E-08 | 101 | 2.658 |                                        |               |
| DMRNW_015094604.1:424701  | NW_015094604.1 | 424701  | 427700  | 3000 | 1 | 6.46E-09 | 68  | 2.267 |                                        |               |
| DMRNW_015094604.1:495701  | NW_015094604.1 | 495701  | 497500  | 1800 | 1 | 2.53E-08 | 70  | 3.889 |                                        |               |
| DMRNW_015094605.1:295401  | NW_015094605.1 | 295401  | 295600  | 200  | 1 | 1.71E-08 | 4   | 2     | madd                                   | Signaling     |
| DMRNW_015094605.1:716101  | NW_015094605.1 | 716101  | 716300  | 200  | 1 | 8.32E-08 | 2   | 1     | luzp2                                  |               |
| DMRNW_015094607.1:74801   | NW_015094607.1 | 74801   | 75400   | 600  | 1 | 6.95E-08 | 13  | 2.167 | LOC106912719                           |               |
| DMRNW_015094609.1:420301  | NW_015094609.1 | 420301  | 427000  | 6700 | 1 | 1.47E-08 | 152 | 2.269 |                                        |               |
| DMRNW_015094615.1:13401   | NW_015094615.1 | 13401   | 13900   | 500  | 1 | 1.89E-11 | 13  | 2.6   |                                        |               |
| DMRNW_015094615.1:19501   | NW_015094615.1 | 19501   | 20400   | 900  | 1 | 6.45E-08 | 29  | 3.222 |                                        |               |
| DMRNW_015094618.1:53501   | NW_015094618.1 | 53501   | 56500   | 3000 | 1 | 1.90E-20 | 63  | 2.1   | LOC106914045                           |               |
| DMRNW_015094619.1:38501   | NW_015094619.1 | 38501   | 39900   | 1400 | 2 | 2.49E-12 | 23  | 1.643 |                                        |               |
| DMRNW_015094619.1:131101  | NW_015094619.1 | 131101  | 133700  | 2600 | 3 | 3.93E-10 | 50  | 1.923 | tom1l2                                 | Transport     |
| DMRNW_015094620.1:404501  | NW_015094620.1 | 404501  | 407900  | 3400 | 4 | 1.07E-13 | 44  | 1.294 | LOC106914091;LOC106914092              |               |
| DMRNW_015094622.1:61701   | NW_015094622.1 | 61701   | 64300   | 2600 | 1 | 4.23E-08 | 24  | 0.923 | cd3e                                   | Receptor      |
| DMRNW_015094622.1:67101   | NW_015094622.1 | 67101   | 67900   | 800  | 1 | 5.68E-09 | 8   | 1     | cd3e                                   | Receptor      |
| DMRNW_015094622.1:260501  | NW_015094622.1 | 260501  | 262300  | 1800 | 1 | 6.06E-08 | 46  | 2.556 | mfrp                                   |               |
| DMRNW_015094622.1:844701  | NW_015094622.1 | 844701  | 847300  | 2600 | 2 | 2.18E-08 | 55  | 2.115 | LOC106914149                           |               |
| DMRNW_015094624.1:24901   | NW_015094624.1 | 24901   | 25400   | 500  | 1 | 1.39E-09 | 12  | 2.4   | LOC106914241                           |               |
| DMRNW_015094625.1:152301  | NW_015094625.1 | 152301  | 152500  | 200  | 1 | 2.58E-08 | 7   | 3.5   | LOC106914290                           |               |
| DMRNW_015094628.1:287501  | NW_015094628.1 | 287501  | 288000  | 500  | 3 | 2.02E-14 | 7   | 1.4   | LOC106914397                           |               |
| DMRNW_015094630.1:250201  | NW_015094630.1 | 250201  | 252400  | 2200 | 1 | 2.86E-08 | 57  | 2.591 | dtnbp1                                 |               |
| DMRNW_015094630.1:434001  | NW_015094630.1 | 434001  | 434400  | 400  | 1 | 7.63E-10 | 7   | 1.75  |                                        |               |
| DMRNW_015094631.1:236901  | NW_015094631.1 | 236901  | 237500  | 600  | 1 | 1.41E-08 | 56  | 9.333 | ikkip                                  |               |
| DMRNW_015094631.1:353801  | NW_015094631.1 | 353801  | 354800  | 1000 | 2 | 1.26E-08 | 47  | 4.7   | anks1b                                 | Receptor      |
| DMRNW_015094632.1:178501  | NW_015094632.1 | 178501  | 178800  | 300  | 1 | 7.32E-08 | 0   | 0     | LOC106914491                           |               |
| DMRNW_015094632.1:452801  | NW_015094632.1 | 452801  | 453000  | 200  | 1 | 3.76E-09 | 9   | 4.5   |                                        |               |
| DMRNW_015094633.1:101     | NW_015094633.1 | 101     | 2500    | 2400 | 1 | 6.23E-11 | 69  | 2.875 | LOC106914539                           |               |
| DMRNW_015094635.1:306801  | NW_015094635.1 | 306801  | 307100  | 300  | 1 | 5.73E-08 | 17  | 5.667 | LOC106914603                           |               |
| DMRNW_015094635.1:524001  | NW_015094635.1 | 524001  | 525400  | 1400 | 3 | 8.89E-19 | 36  | 2.571 | LOC106914608                           |               |
| DMRNW_015094638.1:145501  | NW_015094638.1 | 145501  | 148400  | 2900 | 1 | 2.34E-09 | 110 | 3.793 | clcn5                                  | Metabolism    |
| DMRNW_015094641.1:421401  | NW_015094641.1 | 421401  | 427500  | 6100 | 1 | 6.61E-08 | 141 | 2.311 | LOC106914751                           |               |
| DMRNW_015094642.1:351401  | NW_015094642.1 | 351401  | 353200  | 1800 | 2 | 3.68E-16 | 37  | 2.056 |                                        |               |
| DMRNW_015094645.1:129401  | NW_015094645.1 | 129401  | 131500  | 2100 | 1 | 3.61E-08 | 56  | 2.667 | LOC106914847                           |               |
| DMRNW_015094645.1:242501  | NW_015094645.1 | 242501  | 243700  | 1200 | 1 | 5.95E-08 | 55  | 4.583 | acaca                                  | Metabolism    |
| DMRNW_015094645.1:279801  | NW_015094645.1 | 279801  | 281600  | 1800 | 1 | 1.40E-08 | 53  | 2.944 |                                        |               |
| DMRNW_015094646.1:28601   | NW_015094646.1 | 28601   | 30300   | 1700 | 1 | 1.54E-08 | 47  | 2.765 | rapgef2                                |               |
| DMRNW_015094648.1:72801   | NW_015094648.1 | 72801   | 73700   | 900  | 3 | 1.22E-10 | 10  | 1.111 | LOC106914884                           |               |
| DMRNW_015094649.1:577301  | NW_015094649.1 | 577301  | 577900  | 600  | 1 | 6.58E-10 | 9   | 1.5   | sh3kbp1                                | Signaling     |
| DMRNW_015094651.1:330401  | NW_015094651.1 | 330401  | 330600  | 200  | 1 | 3.08E-08 | 5   | 2.5   |                                        |               |
| DMRNW_015094651.1:508601  | NW_015094651.1 | 508601  | 510000  | 1400 | 1 | 8.67E-11 | 13  | 0.929 | LOC106915004                           |               |
| DMRNW_015094655.1:341701  | NW_015094655.1 | 341701  | 342200  | 500  | 1 | 1.60E-08 | 6   | 1.2   |                                        |               |
| DMRNW_015094655.1:344101  | NW_015094655.1 | 344101  | 345500  | 1400 | 1 | 1.81E-10 | 22  | 1.571 |                                        |               |
| DMRNW_015094660.1:354801  | NW_015094660.1 | 354801  | 355900  | 1100 | 1 | 5.86E-08 | 37  | 3.364 | zeb1                                   | Transcription |

|                          |                |        |        |      |    |          |     |       |                           |  |                 |
|--------------------------|----------------|--------|--------|------|----|----------|-----|-------|---------------------------|--|-----------------|
| DMRNW_015094661.1:221101 | NW_015094661.1 | 221101 | 221400 | 300  | 1  | 5.63E-10 | 17  | 5.667 | usp7                      |  | Protease        |
| DMRNW_015094666.1:784101 | NW_015094666.1 | 784101 | 784400 | 300  | 1  | 2.98E-08 | 17  | 5.667 | LOC106915352              |  |                 |
| DMRNW_015094668.1:255001 | NW_015094668.1 | 255001 | 256000 | 1000 | 2  | 2.26E-12 | 33  | 3.3   | LOC106915397              |  |                 |
| DMRNW_015094668.1:282001 | NW_015094668.1 | 282001 | 282600 | 600  | 1  | 8.46E-09 | 31  | 5.167 | hibadh                    |  | Metabolism      |
| DMRNW_015094670.1:9401   | NW_015094670.1 | 9401   | 9800   | 400  | 1  | 2.64E-08 | 26  | 6.5   |                           |  |                 |
| DMRNW_015094673.1:10901  | NW_015094673.1 | 10901  | 15000  | 4100 | 1  | 2.04E-08 | 52  | 1.268 | LOC106915470              |  |                 |
| DMRNW_015094680.1:485901 | NW_015094680.1 | 485901 | 486400 | 500  | 1  | 4.81E-08 | 41  | 8.2   | grhl3                     |  | Transcription   |
| DMRNW_015094681.1:231901 | NW_015094681.1 | 231901 | 233800 | 1900 | 2  | 2.11E-09 | 79  | 4.158 |                           |  |                 |
| DMRNW_015094681.1:490401 | NW_015094681.1 | 490401 | 490800 | 400  | 1  | 4.14E-08 | 9   | 2.25  |                           |  |                 |
| DMRNW_015094681.1:526501 | NW_015094681.1 | 526501 | 527000 | 500  | 1  | 1.18E-08 | 0   | 0     | LOC106915710;LOC106915711 |  |                 |
| DMRNW_015094688.1:211501 | NW_015094688.1 | 211501 | 217700 | 6200 | 1  | 4.72E-08 | 150 | 2.419 |                           |  |                 |
| DMRNW_015094690.1:254401 | NW_015094690.1 | 254401 | 256300 | 1900 | 1  | 1.60E-14 | 63  | 3.316 | LOC106915865              |  |                 |
| DMRNW_015094691.1:57401  | NW_015094691.1 | 57401  | 62700  | 5300 | 5  | 5.94E-14 | 75  | 1.415 |                           |  |                 |
| DMRNW_015094692.1:193401 | NW_015094692.1 | 193401 | 197500 | 4100 | 2  | 2.13E-20 | 56  | 1.366 | ufm1                      |  | Proteolysis     |
| DMRNW_015094693.1:537701 | NW_015094693.1 | 537701 | 540700 | 3000 | 3  | 1.72E-08 | 90  | 3     | LOC106915980              |  |                 |
| DMRNW_015094694.1:134201 | NW_015094694.1 | 134201 | 134400 | 200  | 2  | 4.47E-09 | 7   | 3.5   | rreb1                     |  | Signaling       |
| DMRNW_015094694.1:403101 | NW_015094694.1 | 403101 | 407000 | 3900 | 2  | 8.26E-11 | 166 | 4.256 | LOC106916028              |  |                 |
| DMRNW_015094694.1:444101 | NW_015094694.1 | 444101 | 445100 | 1000 | 2  | 1.28E-09 | 30  | 3     | LOC106916029              |  |                 |
| DMRNW_015094696.1:150301 | NW_015094696.1 | 150301 | 150500 | 200  | 1  | 4.10E-08 | 6   | 3     | sspn                      |  | Development     |
| DMRNW_015094696.1:320301 | NW_015094696.1 | 320301 | 324100 | 3800 | 3  | 1.97E-25 | 70  | 1.842 | slc17a8                   |  | Transport       |
| DMRNW_015094696.1:328101 | NW_015094696.1 | 328101 | 328900 | 800  | 1  | 2.61E-08 | 26  | 3.25  |                           |  |                 |
| DMRNW_015094696.1:335301 | NW_015094696.1 | 335301 | 336900 | 1600 | 11 | 4.91E-52 | 94  | 5.875 |                           |  |                 |
| DMRNW_015094696.1:339901 | NW_015094696.1 | 339901 | 341300 | 1400 | 5  | 8.02E-36 | 45  | 3.214 |                           |  |                 |
| DMRNW_015094696.1:381301 | NW_015094696.1 | 381301 | 381600 | 300  | 1  | 4.83E-09 | 2   | 0.667 | ppf1bp1                   |  | Signaling       |
| DMRNW_015094699.1:408301 | NW_015094699.1 | 408301 | 408500 | 200  | 2  | 7.91E-12 | 3   | 1.5   | LOC106916141;LOC106916151 |  |                 |
| DMRNW_015094699.1:416501 | NW_015094699.1 | 416501 | 417000 | 500  | 3  | 7.37E-14 | 27  | 5.4   | LOC106916141;LOC106916151 |  |                 |
| DMRNW_015094702.1:284901 | NW_015094702.1 | 284901 | 285500 | 600  | 1  | 2.20E-08 | 34  | 5.667 | LOC106916198              |  |                 |
| DMRNW_015094703.1:206201 | NW_015094703.1 | 206201 | 206600 | 400  | 2  | 4.09E-16 | 21  | 5.25  | arsb                      |  | Metabolism      |
| DMRNW_015094703.1:232501 | NW_015094703.1 | 232501 | 235800 | 3300 | 1  | 2.01E-10 | 71  | 2.152 | lhfp12                    |  | Transcription   |
| DMRNW_015094704.1:30801  | NW_015094704.1 | 30801  | 32700  | 1900 | 5  | 5.73E-12 | 59  | 3.105 |                           |  |                 |
| DMRNW_015094704.1:43001  | NW_015094704.1 | 43001  | 43800  | 800  | 1  | 4.04E-08 | 62  | 7.75  |                           |  |                 |
| DMRNW_015094709.1:4801   | NW_015094709.1 | 4801   | 5500   | 700  | 1  | 1.23E-08 | 32  | 4.571 |                           |  |                 |
| DMRNW_015094709.1:12301  | NW_015094709.1 | 12301  | 12600  | 300  | 1  | 5.85E-08 | 2   | 0.667 |                           |  |                 |
| DMRNW_015094710.1:725001 | NW_015094710.1 | 725001 | 725800 | 800  | 2  | 5.28E-17 | 19  | 2.375 | drp2                      |  | Cytoskeleton    |
| DMRNW_015094712.1:213401 | NW_015094712.1 | 213401 | 215500 | 2100 | 2  | 3.54E-12 | 58  | 2.762 |                           |  |                 |
| DMRNW_015094712.1:217301 | NW_015094712.1 | 217301 | 218200 | 900  | 1  | 8.62E-09 | 21  | 2.333 |                           |  |                 |
| DMRNW_015094715.1:175101 | NW_015094715.1 | 175101 | 175600 | 500  | 2  | 3.15E-10 | 21  | 4.2   | LOC106916485              |  |                 |
| DMRNW_015094715.1:404101 | NW_015094715.1 | 404101 | 405300 | 1200 | 1  | 2.54E-08 | 38  | 3.167 |                           |  |                 |
| DMRNW_015094718.1:367301 | NW_015094718.1 | 367301 | 368300 | 1000 | 3  | 1.87E-10 | 32  | 3.2   | LOC106916565;LOC106916567 |  |                 |
| DMRNW_015094720.1:430801 | NW_015094720.1 | 430801 | 432700 | 1900 | 2  | 1.65E-12 | 49  | 2.579 | LOC106916593              |  |                 |
| DMRNW_015094721.1:327501 | NW_015094721.1 | 327501 | 328600 | 1100 | 1  | 3.76E-09 | 31  | 2.818 |                           |  |                 |
| DMRNW_015094721.1:433201 | NW_015094721.1 | 433201 | 435500 | 2300 | 1  | 1.02E-08 | 68  | 2.957 | LOC106916609;il17rel      |  |                 |
| DMRNW_015094725.1:100301 | NW_015094725.1 | 100301 | 101900 | 1600 | 1  | 2.50E-11 | 38  | 2.375 | jade2                     |  |                 |
| DMRNW_015094725.1:187701 | NW_015094725.1 | 187701 | 188300 | 600  | 2  | 5.42E-14 | 19  | 3.167 | jade2                     |  |                 |
| DMRNW_015094725.1:285801 | NW_015094725.1 | 285801 | 287100 | 1300 | 1  | 1.59E-09 | 29  | 2.231 | ppp2ca                    |  | Signaling       |
| DMRNW_015094727.1:535201 | NW_015094727.1 | 535201 | 536900 | 1700 | 1  | 4.25E-08 | 25  | 1.471 | LOC106916738              |  |                 |
| DMRNW_015094729.1:318901 | NW_015094729.1 | 318901 | 319600 | 700  | 1  | 8.47E-09 | 13  | 1.857 | LOC106916756              |  |                 |
| DMRNW_015094732.1:607801 | NW_015094732.1 | 607801 | 608500 | 700  | 2  | 6.26E-18 | 23  | 3.286 | LOC106916795              |  |                 |
| DMRNW_015094734.1:266701 | NW_015094734.1 | 266701 | 269700 | 3000 | 1  | 8.56E-09 | 82  | 2.733 | LOC106916839              |  |                 |
| DMRNW_015094737.1:24101  | NW_015094737.1 | 24101  | 25700  | 1600 | 1  | 1.16E-08 | 37  | 2.312 | LOC106916918              |  |                 |
| DMRNW_015094737.1:429401 | NW_015094737.1 | 429401 | 429700 | 300  | 1  | 1.22E-08 | 1   | 0.333 | LOC106916936              |  |                 |
| DMRNW_015094745.1:211601 | NW_015094745.1 | 211601 | 212100 | 500  | 3  | 1.59E-16 | 21  | 4.2   |                           |  |                 |
| DMRNW_015094746.1:61901  | NW_015094746.1 | 61901  | 63400  | 1500 | 2  | 1.95E-09 | 61  | 4.067 | dusp16                    |  | Signaling       |
| DMRNW_015094746.1:71701  | NW_015094746.1 | 71701  | 73700  | 2000 | 1  | 6.31E-10 | 92  | 4.6   | crebl2                    |  | Receptor        |
| DMRNW_015094746.1:226601 | NW_015094746.1 | 226601 | 228600 | 2000 | 1  | 6.90E-09 | 67  | 3.35  |                           |  |                 |
| DMRNW_015094746.1:338401 | NW_015094746.1 | 338401 | 341700 | 3300 | 1  | 2.18E-09 | 101 | 3.061 | prkcq                     |  | Binding Protein |
| DMRNW_015094747.1:94901  | NW_015094747.1 | 94901  | 95700  | 800  | 1  | 2.85E-09 | 39  | 4.875 | samd11                    |  | Transcription   |
| DMRNW_015094754.1:69901  | NW_015094754.1 | 69901  | 70800  | 900  | 1  | 4.10E-08 | 29  | 3.222 | LOC106917224              |  |                 |
| DMRNW_015094757.1:322701 | NW_015094757.1 | 322701 | 324200 | 1500 | 1  | 9.53E-08 | 17  | 1.133 |                           |  |                 |
| DMRNW_015094758.1:244601 | NW_015094758.1 | 244601 | 248700 | 4100 | 1  | 4.21E-10 | 52  | 1.268 | LOC106917306              |  |                 |
| DMRNW_015094759.1:135101 | NW_015094759.1 | 135101 | 139400 | 4300 | 1  | 6.17E-08 | 143 | 3.326 | map2k7                    |  | Signaling       |
| DMRNW_015094761.1:315601 | NW_015094761.1 | 315601 | 316800 | 1200 | 2  | 4.14E-14 | 20  | 1.667 |                           |  |                 |
| DMRNW_015094764.1:23501  | NW_015094764.1 | 23501  | 24100  | 600  | 2  | 6.34E-11 | 21  | 3.5   | astn2;trim32              |  | Unknown         |
| DMRNW_015094766.1:431801 | NW_015094766.1 | 431801 | 434300 | 2500 | 2  | 1.29E-10 | 61  | 2.44  |                           |  |                 |
| DMRNW_015094767.1:49901  | NW_015094767.1 | 49901  | 50300  | 400  | 2  | 4.00E-08 | 18  | 4.5   |                           |  |                 |
| DMRNW_015094767.1:139801 | NW_015094767.1 | 139801 | 145900 | 6100 | 1  | 2.35E-09 | 58  | 0.951 |                           |  |                 |
| DMRNW_015094768.1:537101 | NW_015094768.1 | 537101 | 537800 | 700  | 1  | 2.28E-08 | 14  | 2     | LOC106917555              |  |                 |
| DMRNW_015094768.1:563701 | NW_015094768.1 | 563701 | 566000 | 2300 | 1  | 2.84E-08 | 90  | 3.913 | LOC106917555;npb;sgsh     |  | Metabolism      |
| DMRNW_015094768.1:585801 | NW_015094768.1 | 585801 | 586700 | 900  | 1  | 4.53E-11 | 18  | 2     | LOC106917559              |  |                 |
| DMRNW_015094768.1:784601 | NW_015094768.1 | 784601 | 786800 | 2200 | 1  | 5.64E-08 | 97  | 4.409 | pkd1                      |  | Signaling       |
| DMRNW_015094770.1:383901 | NW_015094770.1 | 383901 | 387500 | 3600 | 1  | 5.37E-13 | 76  | 2.111 | clcn3                     |  | Transport       |
| DMRNW_015094770.1:391801 | NW_015094770.1 | 391801 | 392400 | 600  | 1  | 5.23E-08 | 28  | 4.667 | clcn3                     |  | Transport       |
| DMRNW_015094770.1:599901 | NW_015094770.1 | 599901 | 603600 | 3700 | 1  | 1.45E-08 | 114 | 3.081 | LOC106917629              |  |                 |

|                          |                |        |        |      |   |          |     |       |                           |                      |
|--------------------------|----------------|--------|--------|------|---|----------|-----|-------|---------------------------|----------------------|
| DMRNW_015094770.1:753401 | NW_015094770.1 | 753401 | 756100 | 2700 | 1 | 7.11E-08 | 78  | 2.889 |                           |                      |
| DMRNW_015094771.1:138201 | NW_015094771.1 | 138201 | 138800 | 600  | 1 | 6.28E-17 | 10  | 1.667 | vwa8                      |                      |
| DMRNW_015094771.1:393801 | NW_015094771.1 | 393801 | 395400 | 1600 | 1 | 3.47E-08 | 45  | 2.812 |                           |                      |
| DMRNW_015094771.1:408701 | NW_015094771.1 | 408701 | 410400 | 1700 | 4 | 3.99E-30 | 57  | 3.353 |                           |                      |
| DMRNW_015094772.1:104501 | NW_015094772.1 | 104501 | 107300 | 2800 | 1 | 1.22E-10 | 95  | 3.393 | lrx1b                     |                      |
| DMRNW_015094773.1:102301 | NW_015094773.1 | 102301 | 103900 | 1600 | 4 | 1.69E-19 | 29  | 1.812 | LOC106917670              |                      |
| DMRNW_015094777.1:164301 | NW_015094777.1 | 164301 | 166600 | 2300 | 1 | 1.67E-08 | 35  | 1.522 |                           |                      |
| DMRNW_015094777.1:184301 | NW_015094777.1 | 184301 | 187800 | 3500 | 1 | 5.46E-08 | 111 | 3.171 | LOC106917766;LOC106917769 |                      |
| DMRNW_015094778.1:27501  | NW_015094778.1 | 27501  | 29100  | 1600 | 1 | 2.43E-08 | 37  | 2.312 |                           |                      |
| DMRNW_015094778.1:314401 | NW_015094778.1 | 314401 | 314700 | 300  | 1 | 7.58E-09 | 14  | 4.667 |                           |                      |
| DMRNW_015094780.1:396201 | NW_015094780.1 | 396201 | 396600 | 400  | 2 | 2.38E-09 | 24  | 6     |                           |                      |
| DMRNW_015094781.1:127701 | NW_015094781.1 | 127701 | 130900 | 3200 | 1 | 1.22E-14 | 97  | 3.031 | gnl1                      | Transcription        |
| DMRNW_015094781.1:301301 | NW_015094781.1 | 301301 | 301600 | 300  | 1 | 5.13E-12 | 22  | 7.333 | LOC106917858              |                      |
| DMRNW_015094781.1:467101 | NW_015094781.1 | 467101 | 471100 | 4000 | 1 | 6.00E-08 | 110 | 2.75  | LOC106917864              |                      |
| DMRNW_015094784.1:255601 | NW_015094784.1 | 255601 | 257500 | 1900 | 1 | 7.23E-09 | 19  | 1     | mettl22                   |                      |
| DMRNW_015094785.1:424601 | NW_015094785.1 | 424601 | 424900 | 300  | 2 | 2.14E-10 | 16  | 5.333 |                           |                      |
| DMRNW_015094786.1:115701 | NW_015094786.1 | 115701 | 116700 | 1000 | 1 | 9.58E-08 | 52  | 5.2   | LOC106917945              |                      |
| DMRNW_015094789.1:418401 | NW_015094789.1 | 418401 | 420300 | 1900 | 3 | 2.23E-18 | 52  | 2.737 |                           |                      |
| DMRNW_015094790.1:283901 | NW_015094790.1 | 283901 | 286700 | 2800 | 1 | 3.12E-09 | 106 | 3.786 | grm5                      | Receptor             |
| DMRNW_015094799.1:345301 | NW_015094799.1 | 345301 | 345600 | 300  | 2 | 5.97E-09 | 14  | 4.667 | LOC106918189              |                      |
| DMRNW_015094800.1:212201 | NW_015094800.1 | 212201 | 214900 | 2700 | 2 | 1.21E-09 | 72  | 2.667 | LOC106918212              |                      |
| DMRNW_015094802.1:271401 | NW_015094802.1 | 271401 | 272300 | 900  | 2 | 1.05E-09 | 40  | 4.444 |                           |                      |
| DMRNW_015094806.1:186501 | NW_015094806.1 | 186501 | 186700 | 200  | 1 | 7.55E-08 | 7   | 3.5   | LOC106918278              |                      |
| DMRNW_015094810.1:126101 | NW_015094810.1 | 126101 | 128800 | 2700 | 1 | 1.22E-13 | 49  | 1.815 | LOC106918357;LOC106918358 |                      |
| DMRNW_015094812.1:146801 | NW_015094812.1 | 146801 | 147400 | 600  | 1 | 3.23E-08 | 4   | 0.667 |                           |                      |
| DMRNW_015094813.1:238501 | NW_015094813.1 | 238501 | 239600 | 1100 | 1 | 4.02E-09 | 54  | 4.909 | LOC106918422;LOC106918420 |                      |
| DMRNW_015094813.1:294401 | NW_015094813.1 | 294401 | 295500 | 1100 | 1 | 7.01E-10 | 20  | 1.818 | tns4                      | Signaling            |
| DMRNW_015094813.1:322301 | NW_015094813.1 | 322301 | 322600 | 300  | 1 | 2.54E-11 | 9   | 3     | smarce1                   | Transcription        |
| DMRNW_015094815.1:501    | NW_015094815.1 | 501    | 1200   | 700  | 2 | 3.56E-12 | 38  | 5.429 | LOC106918453              |                      |
| DMRNW_015094817.1:1      | NW_015094817.1 | 1      | 1000   | 1000 | 2 | 5.16E-18 | 59  | 5.9   |                           |                      |
| DMRNW_015094817.1:6501   | NW_015094817.1 | 6501   | 7700   | 1200 | 5 | 4.52E-38 | 81  | 6.75  |                           |                      |
| DMRNW_015094819.1:303601 | NW_015094819.1 | 303601 | 307500 | 3900 | 6 | 1.41E-62 | 77  | 1.974 | LOC106918565              |                      |
| DMRNW_015094819.1:339401 | NW_015094819.1 | 339401 | 344200 | 4800 | 2 | 2.16E-13 | 67  | 1.396 | LOC106918540              |                      |
| DMRNW_015094822.1:95001  | NW_015094822.1 | 95001  | 95300  | 300  | 1 | 6.32E-08 | 15  | 5     | LOC106918628              |                      |
| DMRNW_015094822.1:323401 | NW_015094822.1 | 323401 | 329500 | 6100 | 1 | 1.08E-08 | 234 | 3.836 | cactin                    |                      |
| DMRNW_015094822.1:364801 | NW_015094822.1 | 364801 | 366500 | 1700 | 1 | 1.69E-08 | 41  | 2.412 |                           |                      |
| DMRNW_015094823.1:367301 | NW_015094823.1 | 367301 | 367600 | 300  | 1 | 1.96E-09 | 20  | 6.667 | astn1                     |                      |
| DMRNW_015094825.1:427601 | NW_015094825.1 | 427601 | 428600 | 1000 | 1 | 3.08E-08 | 11  | 1.1   | cplx1                     | Unknown              |
| DMRNW_015094825.1:482401 | NW_015094825.1 | 482401 | 483100 | 700  | 1 | 4.28E-08 | 36  | 5.143 |                           |                      |
| DMRNW_015094826.1:120701 | NW_015094826.1 | 120701 | 122000 | 1300 | 1 | 7.23E-09 | 18  | 1.385 |                           |                      |
| DMRNW_015094827.1:101    | NW_015094827.1 | 101    | 4900   | 4800 | 2 | 3.70E-08 | 25  | 0.521 |                           |                      |
| DMRNW_015094828.1:398601 | NW_015094828.1 | 398601 | 399900 | 1300 | 1 | 6.36E-08 | 14  | 1.077 |                           |                      |
| DMRNW_015094829.1:113201 | NW_015094829.1 | 113201 | 115600 | 2400 | 2 | 3.06E-12 | 54  | 2.25  | usp31                     | Proteolysis          |
| DMRNW_015094829.1:380201 | NW_015094829.1 | 380201 | 386900 | 6700 | 1 | 4.32E-08 | 172 | 2.567 |                           |                      |
| DMRNW_015094830.1:56601  | NW_015094830.1 | 56601  | 57100  | 500  | 1 | 2.41E-08 | 15  | 3     | LOC106918755              |                      |
| DMRNW_015094830.1:193501 | NW_015094830.1 | 193501 | 199900 | 6400 | 1 | 9.61E-08 | 159 | 2.484 | cep112                    |                      |
| DMRNW_015094831.1:55401  | NW_015094831.1 | 55401  | 61800  | 6400 | 1 | 6.50E-08 | 263 | 4.109 | ttbk2                     | Signaling            |
| DMRNW_015094831.1:211801 | NW_015094831.1 | 211801 | 212800 | 1000 | 1 | 1.81E-12 | 40  | 4     |                           |                      |
| DMRNW_015094834.1:33001  | NW_015094834.1 | 33001  | 33600  | 600  | 1 | 1.15E-10 | 9   | 1.5   | poln                      | Transcription        |
| DMRNW_015094834.1:282901 | NW_015094834.1 | 282901 | 283300 | 400  | 1 | 2.88E-09 | 12  | 3     | LOC106918829              |                      |
| DMRNW_015094835.1:107901 | NW_015094835.1 | 107901 | 109100 | 1200 | 2 | 1.42E-12 | 40  | 3.333 | LOC106918850              |                      |
| DMRNW_015094835.1:181801 | NW_015094835.1 | 181801 | 182400 | 600  | 2 | 1.62E-15 | 28  | 4.667 | cdh13                     | Extracellular Matrix |
| DMRNW_015094835.1:187401 | NW_015094835.1 | 187401 | 188200 | 800  | 4 | 9.29E-12 | 41  | 5.125 | cdh13                     | Extracellular Matrix |
| DMRNW_015094835.1:192001 | NW_015094835.1 | 192001 | 193200 | 1200 | 1 | 1.12E-08 | 47  | 3.917 | cdh13                     | Extracellular Matrix |
| DMRNW_015094835.1:461701 | NW_015094835.1 | 461701 | 462900 | 1200 | 2 | 6.86E-22 | 18  | 1.5   |                           |                      |
| DMRNW_015094835.1:467301 | NW_015094835.1 | 467301 | 468000 | 700  | 2 | 2.52E-11 | 1   | 0.143 |                           |                      |
| DMRNW_015094837.1:115101 | NW_015094837.1 | 115101 | 115600 | 500  | 1 | 8.97E-08 | 23  | 4.6   | grxcr1                    | Metabolism           |
| DMRNW_015094840.1:170301 | NW_015094840.1 | 170301 | 171800 | 1500 | 2 | 4.00E-08 | 15  | 1     |                           |                      |
| DMRNW_015094842.1:370701 | NW_015094842.1 | 370701 | 371400 | 700  | 1 | 7.91E-09 | 10  | 1.429 |                           |                      |
| DMRNW_015094843.1:354401 | NW_015094843.1 | 354401 | 355400 | 1000 | 2 | 1.29E-10 | 21  | 2.1   | gramd3                    | Unknown              |
| DMRNW_015094843.1:378501 | NW_015094843.1 | 378501 | 379800 | 1300 | 1 | 8.65E-08 | 39  | 3     | nudt12                    | Metabolism           |
| DMRNW_015094847.1:225401 | NW_015094847.1 | 225401 | 229400 | 4000 | 1 | 9.23E-08 | 57  | 1.425 | LOC106919051              |                      |
| DMRNW_015094849.1:55301  | NW_015094849.1 | 55301  | 58400  | 3100 | 1 | 1.96E-08 | 52  | 1.677 | LOC106919069              |                      |
| DMRNW_015094850.1:9301   | NW_015094850.1 | 9301   | 9500   | 200  | 1 | 3.18E-08 | 10  | 5     | LOC106919075              |                      |
| DMRNW_015094856.1:41501  | NW_015094856.1 | 41501  | 42300  | 800  | 1 | 1.34E-08 | 43  | 5.375 | atp9b                     | Transport            |
| DMRNW_015094857.1:4601   | NW_015094857.1 | 4601   | 7000   | 2400 | 7 | 1.99E-16 | 33  | 1.375 | LOC106919185;LOC106919182 |                      |
| DMRNW_015094858.1:1701   | NW_015094858.1 | 1701   | 2000   | 300  | 1 | 9.61E-08 | 2   | 0.667 |                           |                      |
| DMRNW_015094858.1:8301   | NW_015094858.1 | 8301   | 8700   | 400  | 2 | 7.08E-10 | 2   | 0.5   |                           |                      |
| DMRNW_015094858.1:276001 | NW_015094858.1 | 276001 | 277600 | 1600 | 1 | 2.19E-08 | 30  | 1.875 | LOC106919226              |                      |
| DMRNW_015094859.1:7901   | NW_015094859.1 | 7901   | 9700   | 1800 | 2 | 2.33E-08 | 51  | 2.833 |                           |                      |
| DMRNW_015094859.1:62301  | NW_015094859.1 | 62301  | 65900  | 3600 | 1 | 2.02E-10 | 101 | 2.806 | LOC106919233              |                      |
| DMRNW_015094860.1:315501 | NW_015094860.1 | 315501 | 316900 | 1400 | 2 | 5.73E-08 | 25  | 1.786 |                           |                      |
| DMRNW_015094864.1:141701 | NW_015094864.1 | 141701 | 142000 | 300  | 1 | 2.17E-11 | 16  | 5.333 | LOC106919347              |                      |
| DMRNW_015094864.1:361901 | NW_015094864.1 | 361901 | 365700 | 3800 | 2 | 1.08E-10 | 109 | 2.868 | LOC106919354              |                      |



|                          |                |        |        |      |   |          |     |       |                           |               |
|--------------------------|----------------|--------|--------|------|---|----------|-----|-------|---------------------------|---------------|
| DMRNW_015094866.1:378101 | NW_015094866.1 | 378101 | 380800 | 2700 | 2 | 1.25E-09 | 81  | 3     | LOC106919384              |               |
| DMRNW_015094872.1:152701 | NW_015094872.1 | 152701 | 154600 | 1900 | 2 | 1.87E-11 | 72  | 3.789 | nlg3                      | Signaling     |
| DMRNW_015094874.1:150601 | NW_015094874.1 | 150601 | 151600 | 1000 | 1 | 1.35E-08 | 27  | 2.7   | LOC106919493              |               |
| DMRNW_015094874.1:314101 | NW_015094874.1 | 314101 | 314400 | 300  | 1 | 5.67E-10 | 10  | 3.333 |                           |               |
| DMRNW_015094875.1:293501 | NW_015094875.1 | 293501 | 295400 | 1900 | 2 | 1.57E-08 | 63  | 3.316 | wnk4                      |               |
| DMRNW_015094879.1:209501 | NW_015094879.1 | 209501 | 211800 | 2300 | 1 | 2.71E-08 | 37  | 1.609 | LOC106919570              |               |
| DMRNW_015094882.1:147801 | NW_015094882.1 | 147801 | 148500 | 700  | 1 | 5.00E-08 | 31  | 4.429 | pde9a                     | Signaling     |
| DMRNW_015094883.1:89701  | NW_015094883.1 | 89701  | 92900  | 3200 | 1 | 4.24E-09 | 115 | 3.594 | LOC106919668              |               |
| DMRNW_015094885.1:237501 | NW_015094885.1 | 237501 | 239100 | 1600 | 1 | 8.35E-08 | 48  | 3     |                           |               |
| DMRNW_015094886.1:254801 | NW_015094886.1 | 254801 | 255100 | 300  | 1 | 4.27E-11 | 1   | 0.333 | LOC106919734              |               |
| DMRNW_015094887.1:304201 | NW_015094887.1 | 304201 | 305900 | 1700 | 1 | 1.90E-10 | 50  | 2.941 | spag6                     | Immune        |
| DMRNW_015094889.1:257601 | NW_015094889.1 | 257601 | 260900 | 3300 | 1 | 3.64E-08 | 86  | 2.606 | LOC106919785              |               |
| DMRNW_015094891.1:293401 | NW_015094891.1 | 293401 | 294000 | 600  | 1 | 4.45E-09 | 27  | 4.5   |                           |               |
| DMRNW_015094891.1:321701 | NW_015094891.1 | 321701 | 327700 | 6000 | 2 | 2.08E-10 | 229 | 3.817 | tmem74                    | Signaling     |
| DMRNW_015094892.1:128301 | NW_015094892.1 | 128301 | 128800 | 500  | 1 | 1.28E-08 | 23  | 4.6   | LOC106919816              |               |
| DMRNW_015094900.1:256501 | NW_015094900.1 | 256501 | 257900 | 1400 | 1 | 9.73E-08 | 52  | 3.714 | LOC106919939              |               |
| DMRNW_015094900.1:366701 | NW_015094900.1 | 366701 | 367100 | 400  | 1 | 4.68E-10 | 10  | 2.5   |                           |               |
| DMRNW_015094904.1:370101 | NW_015094904.1 | 370101 | 371800 | 1700 | 1 | 5.97E-11 | 23  | 1.353 | nphp4                     | Development   |
| DMRNW_015094905.1:565301 | NW_015094905.1 | 565301 | 566300 | 1000 | 1 | 1.17E-08 | 43  | 4.3   | opr1                      | Receptor      |
| DMRNW_015094907.1:12001  | NW_015094907.1 | 12001  | 13000  | 1000 | 2 | 1.21E-16 | 34  | 3.4   |                           |               |
| DMRNW_015094908.1:651401 | NW_015094908.1 | 651401 | 651800 | 400  | 1 | 2.86E-08 | 17  | 4.25  |                           |               |
| DMRNW_015094909.1:130701 | NW_015094909.1 | 130701 | 132700 | 2000 | 1 | 1.68E-09 | 70  | 3.5   | syne1                     |               |
| DMRNW_015094910.1:62401  | NW_015094910.1 | 62401  | 62700  | 300  | 1 | 5.01E-09 | 19  | 6.333 | LOC106920069              |               |
| DMRNW_015094912.1:5801   | NW_015094912.1 | 5801   | 6000   | 200  | 1 | 2.37E-09 | 8   | 4     |                           |               |
| DMRNW_015094912.1:104801 | NW_015094912.1 | 104801 | 105900 | 1100 | 3 | 2.06E-10 | 18  | 1.636 | LOC106920123              |               |
| DMRNW_015094913.1:93101  | NW_015094913.1 | 93101  | 93500  | 400  | 2 | 1.96E-09 | 6   | 1.5   | sec16b                    | Unknown       |
| DMRNW_015094917.1:161101 | NW_015094917.1 | 161101 | 169500 | 8400 | 1 | 7.70E-12 | 193 | 2.298 |                           |               |
| DMRNW_015094917.1:199201 | NW_015094917.1 | 199201 | 200500 | 1300 | 2 | 4.88E-12 | 50  | 3.846 |                           |               |
| DMRNW_015094917.1:203501 | NW_015094917.1 | 203501 | 203800 | 300  | 1 | 2.01E-08 | 24  | 8     |                           |               |
| DMRNW_015094917.1:275201 | NW_015094917.1 | 275201 | 276600 | 1400 | 1 | 9.19E-11 | 73  | 5.214 |                           |               |
| DMRNW_015094919.1:203301 | NW_015094919.1 | 203301 | 205000 | 1700 | 6 | 7.73E-24 | 57  | 3.353 |                           |               |
| DMRNW_015094921.1:161901 | NW_015094921.1 | 161901 | 162300 | 400  | 2 | 1.72E-09 | 2   | 0.5   | piezo1                    |               |
| DMRNW_015094923.1:114601 | NW_015094923.1 | 114601 | 116900 | 2300 | 1 | 6.54E-08 | 68  | 2.957 | vav2                      |               |
| DMRNW_015094924.1:251001 | NW_015094924.1 | 251001 | 251800 | 800  | 1 | 9.33E-08 | 8   | 1     |                           |               |
| DMRNW_015094927.1:243701 | NW_015094927.1 | 243701 | 244200 | 500  | 1 | 1.78E-08 | 2   | 0.4   | spata17                   |               |
| DMRNW_015094934.1:124601 | NW_015094934.1 | 124601 | 130300 | 5700 | 1 | 4.35E-08 | 206 | 3.614 | LOC106920461;LOC106920460 |               |
| DMRNW_015094934.1:164001 | NW_015094934.1 | 164001 | 164400 | 400  | 1 | 1.57E-13 | 14  | 3.5   | LOC106920465              |               |
| DMRNW_015094935.1:305701 | NW_015094935.1 | 305701 | 306700 | 1000 | 1 | 5.05E-10 | 51  | 5.1   | LOC106920486              |               |
| DMRNW_015094935.1:333001 | NW_015094935.1 | 333001 | 336600 | 3600 | 1 | 6.06E-08 | 129 | 3.583 | LOC106920484              |               |
| DMRNW_015094936.1:78101  | NW_015094936.1 | 78101  | 78600  | 500  | 1 | 2.74E-08 | 15  | 3     | LOC106920493              |               |
| DMRNW_015094938.1:290801 | NW_015094938.1 | 290801 | 292700 | 1900 | 1 | 6.61E-11 | 59  | 3.105 |                           |               |
| DMRNW_015094939.1:41001  | NW_015094939.1 | 41001  | 42600  | 1600 | 1 | 2.70E-11 | 65  | 4.062 | LOC106920538              |               |
| DMRNW_015094942.1:26501  | NW_015094942.1 | 26501  | 26700  | 200  | 1 | 2.19E-13 | 16  | 8     | LOC106920571              |               |
| DMRNW_015094942.1:298501 | NW_015094942.1 | 298501 | 299100 | 600  | 1 | 2.58E-08 | 20  | 3.333 |                           |               |
| DMRNW_015094943.1:131101 | NW_015094943.1 | 131101 | 131600 | 500  | 1 | 1.01E-10 | 8   | 1.6   |                           |               |
| DMRNW_015094943.1:207301 | NW_015094943.1 | 207301 | 207500 | 200  | 1 | 1.52E-08 | 11  | 5.5   |                           |               |
| DMRNW_015094947.1:61401  | NW_015094947.1 | 61401  | 62200  | 800  | 2 | 3.18E-09 | 45  | 5.625 |                           |               |
| DMRNW_015094948.1:350601 | NW_015094948.1 | 350601 | 352861 | 2261 | 2 | 1.79E-10 | 55  | 2.433 |                           |               |
| DMRNW_015094949.1:659401 | NW_015094949.1 | 659401 | 660800 | 1400 | 1 | 4.86E-08 | 17  | 1.214 |                           |               |
| DMRNW_015094954.1:37901  | NW_015094954.1 | 37901  | 39300  | 1400 | 1 | 1.41E-08 | 29  | 2.071 |                           |               |
| DMRNW_015094954.1:147201 | NW_015094954.1 | 147201 | 149000 | 1800 | 2 | 1.10E-11 | 28  | 1.556 | LOC106920754              |               |
| DMRNW_015094954.1:343301 | NW_015094954.1 | 343301 | 347800 | 4500 | 1 | 6.34E-09 | 134 | 2.978 |                           |               |
| DMRNW_015094955.1:98001  | NW_015094955.1 | 98001  | 99900  | 1900 | 5 | 1.81E-14 | 84  | 4.421 | arhgap21                  |               |
| DMRNW_015094955.1:120201 | NW_015094955.1 | 120201 | 120600 | 400  | 1 | 9.40E-09 | 21  | 5.25  | arhgap21                  |               |
| DMRNW_015094957.1:253601 | NW_015094957.1 | 253601 | 254200 | 600  | 1 | 2.19E-08 | 13  | 2.167 |                           |               |
| DMRNW_015094957.1:328001 | NW_015094957.1 | 328001 | 330200 | 2200 | 1 | 3.77E-10 | 45  | 2.045 |                           |               |
| DMRNW_015094959.1:142701 | NW_015094959.1 | 142701 | 145400 | 2700 | 6 | 1.55E-40 | 62  | 2.296 | trps1                     | Development   |
| DMRNW_015094964.1:136001 | NW_015094964.1 | 136001 | 139700 | 3700 | 2 | 8.70E-11 | 95  | 2.568 | LOC106920897              |               |
| DMRNW_015094964.1:201701 | NW_015094964.1 | 201701 | 202900 | 1200 | 2 | 9.99E-11 | 39  | 3.25  |                           |               |
| DMRNW_015094965.1:239901 | NW_015094965.1 | 239901 | 243000 | 3100 | 1 | 3.97E-08 | 81  | 2.613 | tcf7l2                    | Transcription |
| DMRNW_015094968.1:48801  | NW_015094968.1 | 48801  | 49900  | 1100 | 3 | 3.26E-18 | 21  | 1.909 | LOC106920963              |               |
| DMRNW_015094968.1:176201 | NW_015094968.1 | 176201 | 178000 | 1800 | 2 | 1.36E-08 | 22  | 1.222 | fnip1                     |               |
| DMRNW_015094969.1:336401 | NW_015094969.1 | 336401 | 337100 | 700  | 1 | 9.58E-10 | 34  | 4.857 | LOC106920975              |               |
| DMRNW_015094971.1:52401  | NW_015094971.1 | 52401  | 55200  | 2800 | 1 | 2.94E-08 | 93  | 3.321 | LOC106921012              |               |
| DMRNW_015094971.1:177801 | NW_015094971.1 | 177801 | 178900 | 1100 | 1 | 3.29E-09 | 13  | 1.182 | mrpl3                     | Translation   |
| DMRNW_015094972.1:174801 | NW_015094972.1 | 174801 | 176900 | 2100 | 1 | 2.14E-09 | 33  | 1.571 | LOC106921030              |               |
| DMRNW_015094975.1:173801 | NW_015094975.1 | 173801 | 174500 | 700  | 2 | 7.31E-12 | 16  | 2.286 | dtx1                      | Signaling     |
| DMRNW_015094975.1:178301 | NW_015094975.1 | 178301 | 179100 | 800  | 1 | 1.84E-08 | 25  | 3.125 | dtx1                      | Signaling     |
| DMRNW_015094977.1:32501  | NW_015094977.1 | 32501  | 32800  | 300  | 3 | 2.25E-33 | 8   | 2.667 |                           |               |
| DMRNW_015094977.1:66101  | NW_015094977.1 | 66101  | 67900  | 1800 | 1 | 1.53E-09 | 31  | 1.722 | adamts7                   | Protease      |
| DMRNW_015094979.1:181001 | NW_015094979.1 | 181001 | 181200 | 200  | 1 | 8.31E-08 | 1   | 0.5   | LOC106921130              |               |
| DMRNW_015094980.1:6601   | NW_015094980.1 | 6601   | 7400   | 800  | 1 | 6.87E-12 | 22  | 2.75  |                           |               |
| DMRNW_015094982.1:230101 | NW_015094982.1 | 230101 | 230600 | 500  | 1 | 5.62E-08 | 21  | 4.2   | mybpc2                    |               |
| DMRNW_015094988.1:182301 | NW_015094988.1 | 182301 | 188400 | 6100 | 1 | 2.14E-08 | 148 | 2.426 | LOC106921283              |               |

|                          |                |        |          |      |    |          |     |       |                           |                      |
|--------------------------|----------------|--------|----------|------|----|----------|-----|-------|---------------------------|----------------------|
| DMRNW_015094988.1:226701 | NW_015094988.1 | 226701 | 229000   | 2300 | 1  | 4.00E-08 | 104 | 4.522 | kif2a                     | Cytoskeleton         |
| DMRNW_015094988.1:389201 | NW_015094988.1 | 389201 | 391400   | 2200 | 1  | 2.30E-11 | 60  | 2.727 | sv2c                      | Development          |
| DMRNW_015094990.1:165101 | NW_015094990.1 | 165101 | 169600   | 4500 | 1  | 7.12E-08 | 123 | 2.733 |                           |                      |
| DMRNW_015094990.1:280101 | NW_015094990.1 | 280101 | 281100   | 1000 | 2  | 7.60E-09 | 12  | 1.2   | LOC106921331              |                      |
| DMRNW_015094990.1:452501 | NW_015094990.1 | 452501 | 455700   | 3200 | 1  | 1.08E-09 | 88  | 2.75  | scml2                     | Transcription        |
| DMRNW_015094992.1:288101 | NW_015094992.1 | 288101 | 288400   | 300  | 2  | 2.27E-14 | 21  | 7     | vamp1                     | Development          |
| DMRNW_015094994.1:202501 | NW_015094994.1 | 202501 | 207000   | 4500 | 1  | 2.50E-10 | 185 | 4.111 | LOC106921416              |                      |
| DMRNW_015094995.1:311301 | NW_015094995.1 | 311301 | 314500   | 3200 | 1  | 9.85E-11 | 100 | 3.125 |                           |                      |
| DMRNW_015094998.1:226301 | NW_015094998.1 | 226301 | 227800   | 1500 | 1  | 1.99E-22 | 46  | 3.067 | sptbn4                    | Cytoskeleton         |
| DMRNW_015094998.1:328601 | NW_015094998.1 | 328601 | 331300   | 2700 | 1  | 1.86E-12 | 60  | 2.222 | LOC106921482              |                      |
| DMRNW_015094999.1:308901 | NW_015094999.1 | 308901 | 309000   | 100  | 1  | 1.72E-10 | 2   | 2     |                           |                      |
| DMRNW_015095003.1:166201 | NW_015095003.1 | 166201 | 170000   | 3800 | 1  | 4.93E-08 | 118 | 3.105 | LOC106921527              |                      |
| DMRNW_015095007.1:62701  | NW_015095007.1 | 62701  | 65400    | 2700 | 2  | 1.78E-12 | 59  | 2.185 | unc13b                    |                      |
| DMRNW_015095007.1:67601  | NW_015095007.1 | 67601  | 69000    | 1400 | 1  | 6.31E-08 | 45  | 3.214 | unc13b                    |                      |
| DMRNW_015095007.1:91001  | NW_015095007.1 | 91001  | 93600    | 2600 | 1  | 5.78E-08 | 100 | 3.846 | stoml2                    | Cytoskeleton         |
| DMRNW_015095007.1:102901 | NW_015095007.1 | 102901 | 104400   | 1500 | 1  | 7.46E-09 | 38  | 2.533 |                           |                      |
| DMRNW_015095007.1:330301 | NW_015095007.1 | 330301 | 330500   | 200  | 1  | 7.39E-09 | 4   | 2     |                           |                      |
| DMRNW_015095008.1:147401 | NW_015095008.1 | 147401 | 148500   | 1100 | 3  | 1.52E-15 | 31  | 2.818 | mtcl1                     |                      |
| DMRNW_015095008.1:278901 | NW_015095008.1 | 278901 | 280400   | 1500 | 1  | 1.51E-10 | 38  | 2.533 | twsg1                     |                      |
| DMRNW_015095012.1:26501  | NW_015095012.1 | 26501  | 28000    | 1500 | 1  | 1.67E-22 | 38  | 2.533 | syne3                     |                      |
| DMRNW_015095013.1:187001 | NW_015095013.1 | 187001 | 189000   | 2000 | 1  | 6.24E-08 | 17  | 0.85  |                           |                      |
| DMRNW_015095013.1:197201 | NW_015095013.1 | 197201 | 2.00E+05 | 2800 | 2  | 9.49E-10 | 39  | 1.393 |                           |                      |
| DMRNW_015095014.1:86001  | NW_015095014.1 | 86001  | 87700    | 1700 | 2  | 2.18E-12 | 34  | 2     |                           |                      |
| DMRNW_015095018.1:59901  | NW_015095018.1 | 59901  | 67100    | 7200 | 1  | 4.76E-09 | 216 | 3     |                           |                      |
| DMRNW_015095019.1:112001 | NW_015095019.1 | 112001 | 113400   | 1400 | 1  | 6.24E-08 | 32  | 2.286 |                           | 5-Sep Cytoskeleton   |
| DMRNW_015095021.1:147401 | NW_015095021.1 | 147401 | 147700   | 300  | 1  | 9.51E-13 | 17  | 5.667 | snap25                    | Transport            |
| DMRNW_015095024.1:740501 | NW_015095024.1 | 740501 | 741300   | 800  | 1  | 6.79E-09 | 25  | 3.125 |                           |                      |
| DMRNW_015095028.1:179701 | NW_015095028.1 | 179701 | 180200   | 500  | 1  | 5.34E-09 | 7   | 1.4   | LOC106921849              |                      |
| DMRNW_015095030.1:114501 | NW_015095030.1 | 114501 | 116200   | 1700 | 1  | 4.42E-09 | 72  | 4.235 | LOC106921873              |                      |
| DMRNW_015095036.1:2901   | NW_015095036.1 | 2901   | 4900     | 2000 | 3  | 1.32E-11 | 57  | 2.85  |                           |                      |
| DMRNW_015095037.1:71201  | NW_015095037.1 | 71201  | 73400    | 2200 | 1  | 1.55E-09 | 45  | 2.045 | dgkz                      | Signaling            |
| DMRNW_015095037.1:141901 | NW_015095037.1 | 141901 | 142600   | 700  | 1  | 1.51E-08 | 18  | 2.571 | nox5                      | Metabolism           |
| DMRNW_015095037.1:158001 | NW_015095037.1 | 158001 | 158700   | 700  | 3  | 1.91E-13 | 6   | 0.857 | rprip1l                   | Metabolism           |
| DMRNW_015095037.1:164401 | NW_015095037.1 | 164401 | 167700   | 3300 | 1  | 2.70E-10 | 100 | 3.03  | rpgrip1l                  | Metabolism           |
| DMRNW_015095040.1:273901 | NW_015095040.1 | 273901 | 275100   | 1200 | 1  | 1.63E-09 | 29  | 2.417 | LOC106921999              |                      |
| DMRNW_015095040.1:301301 | NW_015095040.1 | 301301 | 301600   | 300  | 1  | 1.56E-11 | 3   | 1     | LOC106921999              |                      |
| DMRNW_015095042.1:20301  | NW_015095042.1 | 20301  | 22100    | 1800 | 3  | 2.59E-14 | 55  | 3.056 | LOC106922027              |                      |
| DMRNW_015095042.1:275601 | NW_015095042.1 | 275601 | 276200   | 600  | 1  | 5.62E-09 | 43  | 7.167 | LOC106922041              |                      |
| DMRNW_015095049.1:32901  | NW_015095049.1 | 32901  | 34200    | 1300 | 1  | 4.20E-08 | 28  | 2.154 | LOC106922123              |                      |
| DMRNW_015095049.1:49301  | NW_015095049.1 | 49301  | 53300    | 4000 | 1  | 4.28E-12 | 119 | 2.975 | LOC106922123              |                      |
| DMRNW_015095051.1:286901 | NW_015095051.1 | 286901 | 289400   | 2500 | 2  | 4.13E-15 | 64  | 2.56  | nyap1                     |                      |
| DMRNW_015095051.1:295201 | NW_015095051.1 | 295201 | 296600   | 1400 | 3  | 1.07E-21 | 20  | 1.429 | nyap1;LOC106922191        |                      |
| DMRNW_015095058.1:399801 | NW_015095058.1 | 399801 | 400500   | 700  | 1  | 6.17E-08 | 18  | 2.571 | antrx2                    | Receptor             |
| DMRNW_015095058.1:422501 | NW_015095058.1 | 422501 | 424700   | 2200 | 1  | 2.78E-08 | 70  | 3.182 | antrx2                    | Receptor             |
| DMRNW_015095060.1:288201 | NW_015095060.1 | 288201 | 289500   | 1300 | 4  | 9.95E-12 | 22  | 1.692 | asic2                     | Transport            |
| DMRNW_015095061.1:142401 | NW_015095061.1 | 142401 | 143400   | 1000 | 1  | 2.37E-10 | 33  | 3.3   | atp2a3                    | Transport            |
| DMRNW_015095065.1:52701  | NW_015095065.1 | 52701  | 55900    | 3200 | 1  | 1.03E-10 | 107 | 3.344 | LOC106922390              |                      |
| DMRNW_015095074.1:264201 | NW_015095074.1 | 264201 | 266400   | 2200 | 1  | 5.45E-25 | 60  | 2.727 | dnah9                     | Cytoskeleton         |
| DMRNW_015095076.1:55801  | NW_015095076.1 | 55801  | 56400    | 600  | 1  | 2.02E-08 | 13  | 2.167 | lama5                     | Extracellular Matrix |
| DMRNW_015095076.1:66401  | NW_015095076.1 | 66401  | 67000    | 600  | 1  | 3.92E-09 | 7   | 1.167 | lama5                     | Extracellular Matrix |
| DMRNW_015095076.1:170701 | NW_015095076.1 | 170701 | 173100   | 2400 | 2  | 3.95E-10 | 33  | 1.375 | LOC106922530              |                      |
| DMRNW_015095076.1:269301 | NW_015095076.1 | 269301 | 269600   | 300  | 2  | 6.12E-12 | 16  | 5.333 |                           |                      |
| DMRNW_015095078.1:58201  | NW_015095078.1 | 58201  | 62400    | 4200 | 2  | 4.85E-10 | 57  | 1.357 | LOC106922548              |                      |
| DMRNW_015095081.1:8001   | NW_015095081.1 | 8001   | 9000     | 1000 | 3  | 5.52E-12 | 25  | 2.5   | LOC106922590              |                      |
| DMRNW_015095081.1:70501  | NW_015095081.1 | 70501  | 73100    | 2600 | 1  | 1.83E-14 | 111 | 4.269 | supt5h                    | Transcription        |
| DMRNW_015095092.1:123701 | NW_015095092.1 | 123701 | 125800   | 2100 | 3  | 4.18E-16 | 62  | 2.952 | LOC106922765              |                      |
| DMRNW_015095094.1:59801  | NW_015095094.1 | 59801  | 62900    | 3100 | 1  | 4.63E-16 | 97  | 3.129 | LOC106922798              |                      |
| DMRNW_015095096.1:201    | NW_015095096.1 | 201    | 1700     | 1500 | 3  | 8.31E-11 | 51  | 3.4   |                           |                      |
| DMRNW_015095096.1:142801 | NW_015095096.1 | 142801 | 144200   | 1400 | 1  | 6.21E-08 | 53  | 3.786 | LOC106922828              |                      |
| DMRNW_015095097.1:9301   | NW_015095097.1 | 9301   | 16200    | 6900 | 1  | 1.22E-08 | 166 | 2.406 |                           |                      |
| DMRNW_015095098.1:74901  | NW_015095098.1 | 74901  | 76800    | 1900 | 2  | 1.55E-09 | 52  | 2.737 | LOC106922868              |                      |
| DMRNW_015095098.1:197601 | NW_015095098.1 | 197601 | 199300   | 1700 | 1  | 1.29E-09 | 47  | 2.765 |                           |                      |
| DMRNW_015095098.1:240801 | NW_015095098.1 | 240801 | 241400   | 600  | 3  | 4.34E-15 | 9   | 1.5   |                           |                      |
| DMRNW_015095099.1:24101  | NW_015095099.1 | 24101  | 26900    | 2800 | 10 | 1.33E-14 | 97  | 3.464 |                           |                      |
| DMRNW_015095099.1:30801  | NW_015095099.1 | 30801  | 32800    | 2000 | 13 | 2.08E-15 | 132 | 6.6   |                           |                      |
| DMRNW_015095099.1:37401  | NW_015095099.1 | 37401  | 38000    | 600  | 1  | 1.33E-10 | 31  | 5.167 |                           |                      |
| DMRNW_015095099.1:136401 | NW_015095099.1 | 136401 | 137600   | 1200 | 2  | 7.70E-11 | 77  | 6.417 | igfbp7;LOC106922884       | Unknown              |
| DMRNW_015095107.1:74501  | NW_015095107.1 | 74501  | 74800    | 300  | 2  | 8.40E-11 | 8   | 2.667 |                           |                      |
| DMRNW_015095108.1:67701  | NW_015095108.1 | 67701  | 68100    | 400  | 1  | 6.48E-08 | 11  | 2.75  |                           |                      |
| DMRNW_015095108.1:296601 | NW_015095108.1 | 296601 | 300200   | 3600 | 1  | 4.40E-09 | 73  | 2.028 | commd10                   |                      |
| DMRNW_015095109.1:10601  | NW_015095109.1 | 10601  | 15100    | 4500 | 1  | 2.09E-09 | 125 | 2.778 | LOC106923082              |                      |
| DMRNW_015095109.1:16301  | NW_015095109.1 | 16301  | 17700    | 1400 | 1  | 1.02E-09 | 25  | 1.786 | LOC106923082;LOC106923083 |                      |
| DMRNW_015095109.1:20701  | NW_015095109.1 | 20701  | 21900    | 1200 | 5  | 8.63E-12 | 5   | 0.417 | LOC106923083              |                      |

|                          |                |        |        |      |    |          |     |       |                           |                        |
|--------------------------|----------------|--------|--------|------|----|----------|-----|-------|---------------------------|------------------------|
| DMRNW_015095109.1:27401  | NW_015095109.1 | 27401  | 30500  | 3100 | 2  | 1.22E-15 | 61  | 1.968 | LOC106923083              |                        |
| DMRNW_015095109.1:207301 | NW_015095109.1 | 207301 | 208200 | 900  | 1  | 1.06E-08 | 46  | 5.111 | LOC106923075              |                        |
| DMRNW_015095109.1:213701 | NW_015095109.1 | 213701 | 214400 | 700  | 2  | 4.50E-08 | 35  | 5     | LOC106923075              |                        |
| DMRNW_015095113.1:262801 | NW_015095113.1 | 262801 | 263600 | 800  | 4  | 6.63E-31 | 29  | 3.625 | LOC106923133;LOC106923140 |                        |
| DMRNW_015095113.1:282001 | NW_015095113.1 | 282001 | 285100 | 3100 | 1  | 1.53E-14 | 70  | 2.258 | LOC106923133              |                        |
| DMRNW_015095115.1:212701 | NW_015095115.1 | 212701 | 217300 | 4600 | 2  | 5.77E-09 | 161 | 3.5   |                           |                        |
| DMRNW_015095127.1:284201 | NW_015095127.1 | 284201 | 285600 | 1400 | 1  | 1.68E-09 | 52  | 3.714 |                           |                        |
| DMRNW_015095135.1:82601  | NW_015095135.1 | 82601  | 87100  | 4500 | 2  | 2.12E-10 | 161 | 3.578 | LOC106923452              |                        |
| DMRNW_015095136.1:200401 | NW_015095136.1 | 200401 | 203100 | 2700 | 2  | 1.25E-08 | 116 | 4.296 | LOC106923462              |                        |
| DMRNW_015095136.1:204801 | NW_015095136.1 | 204801 | 206400 | 1600 | 6  | 1.00E-21 | 61  | 3.812 | LOC106923462              |                        |
| DMRNW_015095142.1:392701 | NW_015095142.1 | 392701 | 392900 | 200  | 2  | 3.75E-15 | 1   | 0.5   | LOC106923563              |                        |
| DMRNW_015095147.1:107001 | NW_015095147.1 | 107001 | 109900 | 2900 | 4  | 1.74E-13 | 91  | 3.138 |                           |                        |
| DMRNW_015095147.1:285701 | NW_015095147.1 | 285701 | 288100 | 2400 | 1  | 7.08E-08 | 82  | 3.417 | arap2                     | Signaling              |
| DMRNW_015095150.1:248001 | NW_015095150.1 | 248001 | 248500 | 500  | 1  | 2.74E-08 | 5   | 1     | LOC106923666              |                        |
| DMRNW_015095156.1:18001  | NW_015095156.1 | 18001  | 19500  | 1500 | 1  | 2.50E-09 | 29  | 1.933 |                           |                        |
| DMRNW_015095158.1:269401 | NW_015095158.1 | 269401 | 270500 | 1100 | 2  | 5.08E-19 | 11  | 1     |                           |                        |
| DMRNW_015095159.1:140701 | NW_015095159.1 | 140701 | 141200 | 500  | 1  | 4.37E-08 | 5   | 1     |                           |                        |
| DMRNW_015095162.1:56701  | NW_015095162.1 | 56701  | 57300  | 600  | 1  | 4.12E-11 | 17  | 2.833 |                           |                        |
| DMRNW_015095162.1:271001 | NW_015095162.1 | 271001 | 273500 | 2500 | 1  | 7.51E-14 | 39  | 1.56  | LOC106923811              |                        |
| DMRNW_015095167.1:131301 | NW_015095167.1 | 131301 | 131900 | 600  | 2  | 1.00E-19 | 7   | 1.167 |                           |                        |
| DMRNW_015095169.1:27301  | NW_015095169.1 | 27301  | 30600  | 3300 | 1  | 1.09E-12 | 94  | 2.848 |                           |                        |
| DMRNW_015095169.1:43301  | NW_015095169.1 | 43301  | 43700  | 400  | 1  | 1.65E-10 | 10  | 2.5   | LOC106923886              |                        |
| DMRNW_015095170.1:126901 | NW_015095170.1 | 126901 | 132300 | 5400 | 1  | 4.70E-12 | 155 | 2.87  | unc13c                    | Development            |
| DMRNW_015095177.1:9601   | NW_015095177.1 | 9601   | 10100  | 500  | 2  | 6.83E-11 | 32  | 6.4   |                           |                        |
| DMRNW_015095177.1:92501  | NW_015095177.1 | 92501  | 93300  | 800  | 1  | 1.72E-08 | 13  | 1.625 | LOC106923986              |                        |
| DMRNW_015095177.1:134101 | NW_015095177.1 | 134101 | 135900 | 1800 | 1  | 3.71E-08 | 22  | 1.222 | zbtb10                    | Transcription          |
| DMRNW_015095180.1:188201 | NW_015095180.1 | 188201 | 189900 | 1700 | 1  | 2.36E-10 | 62  | 3.647 | LOC106924058              |                        |
| DMRNW_015095180.1:192501 | NW_015095180.1 | 192501 | 194100 | 1600 | 1  | 7.17E-08 | 29  | 1.812 | LOC106924058              |                        |
| DMRNW_015095180.1:210601 | NW_015095180.1 | 210601 | 216700 | 6100 | 1  | 7.71E-08 | 248 | 4.066 | LOC106924056              |                        |
| DMRNW_015095180.1:223201 | NW_015095180.1 | 223201 | 224700 | 1500 | 2  | 1.07E-33 | 57  | 3.8   | LOC106924056              |                        |
| DMRNW_015095181.1:268101 | NW_015095181.1 | 268101 | 269800 | 1700 | 4  | 8.20E-13 | 40  | 2.353 |                           |                        |
| DMRNW_015095184.1:282701 | NW_015095184.1 | 282701 | 283200 | 500  | 2  | 1.20E-31 | 11  | 2.2   | LOC106924122              |                        |
| DMRNW_015095186.1:191501 | NW_015095186.1 | 191501 | 191900 | 400  | 1  | 1.31E-10 | 11  | 2.75  |                           |                        |
| DMRNW_015095188.1:85101  | NW_015095188.1 | 85101  | 85400  | 300  | 1  | 8.53E-13 | 24  | 8     |                           |                        |
| DMRNW_015095188.1:109401 | NW_015095188.1 | 109401 | 110800 | 1400 | 1  | 2.08E-09 | 33  | 2.357 | kifap3                    | Cytoskeleton           |
| DMRNW_015095188.1:112201 | NW_015095188.1 | 112201 | 117200 | 5000 | 1  | 8.03E-13 | 200 | 4     | kifap3                    | Cytoskeleton           |
| DMRNW_015095196.1:108401 | NW_015095196.1 | 108401 | 109000 | 600  | 2  | 4.03E-10 | 20  | 3.333 |                           |                        |
| DMRNW_015095196.1:128101 | NW_015095196.1 | 128101 | 131800 | 3700 | 1  | 6.73E-08 | 63  | 1.703 |                           |                        |
| DMRNW_015095196.1:282401 | NW_015095196.1 | 282401 | 284500 | 2100 | 1  | 1.15E-11 | 116 | 5.524 |                           |                        |
| DMRNW_015095197.1:123901 | NW_015095197.1 | 123901 | 126300 | 2400 | 2  | 6.00E-12 | 72  | 3     | celsr2                    | Cytoskeleton           |
| DMRNW_015095198.1:220301 | NW_015095198.1 | 220301 | 223200 | 2900 | 1  | 8.74E-11 | 109 | 3.759 | LOC106924310              |                        |
| DMRNW_015095204.1:45101  | NW_015095204.1 | 45101  | 45300  | 200  | 1  | 1.32E-08 | 2   | 1     | LOC106924378              |                        |
| DMRNW_015095205.1:137901 | NW_015095205.1 | 137901 | 140600 | 2700 | 1  | 2.42E-16 | 67  | 2.481 | smarcc2                   | Transcription          |
| DMRNW_015095205.1:274801 | NW_015095205.1 | 274801 | 276900 | 2100 | 1  | 9.61E-08 | 36  | 1.714 | LOC106924395              |                        |
| DMRNW_015095209.1:153301 | NW_015095209.1 | 153301 | 153700 | 400  | 1  | 6.49E-09 | 6   | 1.5   | gal3st4                   | Golgi                  |
| DMRNW_015095211.1:81301  | NW_015095211.1 | 81301  | 82900  | 1600 | 2  | 2.72E-09 | 57  | 3.562 | agap1                     | Signaling              |
| DMRNW_015095213.1:389201 | NW_015095213.1 | 389201 | 390700 | 1500 | 4  | 2.00E-10 | 14  | 0.933 | LOC106924519              |                        |
| DMRNW_015095213.1:397601 | NW_015095213.1 | 397601 | 399700 | 2100 | 1  | 8.13E-09 | 35  | 1.667 |                           |                        |
| DMRNW_015095214.1:116301 | NW_015095214.1 | 116301 | 119500 | 3200 | 2  | 5.54E-09 | 50  | 1.562 |                           |                        |
| DMRNW_015095218.1:176001 | NW_015095218.1 | 176001 | 176700 | 700  | 1  | 2.61E-09 | 16  | 2.286 | ppp2r4                    | Signaling              |
| DMRNW_015095218.1:255101 | NW_015095218.1 | 255101 | 257400 | 2300 | 1  | 4.16E-08 | 100 | 4.348 | LOC106924608;cdk9         | Signaling              |
| DMRNW_015095224.1:199801 | NW_015095224.1 | 199801 | 203700 | 3900 | 1  | 9.42E-09 | 118 | 3.026 | csmd3                     |                        |
| DMRNW_015095227.1:195201 | NW_015095227.1 | 195201 | 196000 | 800  | 1  | 3.45E-11 | 30  | 3.75  | actn1                     | Cytoskeleton           |
| DMRNW_015095228.1:177501 | NW_015095228.1 | 177501 | 179300 | 1800 | 2  | 5.43E-13 | 55  | 3.056 | LOC106924750              |                        |
| DMRNW_015095228.1:198601 | NW_015095228.1 | 198601 | 199500 | 900  | 1  | 2.54E-08 | 46  | 5.111 | LOC106924751              |                        |
| DMRNW_015095229.1:82701  | NW_015095229.1 | 82701  | 85600  | 2900 | 1  | 1.22E-12 | 80  | 2.759 | LOC106924774              |                        |
| DMRNW_015095229.1:111601 | NW_015095229.1 | 111601 | 112000 | 400  | 1  | 2.60E-08 | 12  | 3     | LOC106924779;LOC106924778 |                        |
| DMRNW_015095229.1:183501 | NW_015095229.1 | 183501 | 189500 | 6000 | 13 | 7.03E-10 | 283 | 4.717 | LOC106924783;LOC106924784 |                        |
| DMRNW_015095229.1:368301 | NW_015095229.1 | 368301 | 368500 | 200  | 1  | 4.15E-15 | 13  | 6.5   | LOC106924787              |                        |
| DMRNW_015095232.1:307401 | NW_015095232.1 | 307401 | 308300 | 900  | 4  | 3.87E-27 | 45  | 5     | ptprn2                    | Signaling              |
| DMRNW_015095232.1:441701 | NW_015095232.1 | 441701 | 442800 | 1100 | 1  | 6.21E-08 | 23  | 2.091 | esy2                      |                        |
| DMRNW_015095234.1:89901  | NW_015095234.1 | 89901  | 92300  | 2400 | 1  | 6.87E-08 | 55  | 2.292 | glp2r;LOC106924845        |                        |
| DMRNW_015095236.1:176701 | NW_015095236.1 | 176701 | 179100 | 2400 | 2  | 1.54E-10 | 49  | 2.042 | LOC106924875              |                        |
| DMRNW_015095241.1:188101 | NW_015095241.1 | 188101 | 189500 | 1400 | 1  | 6.17E-08 | 41  | 2.929 | LOC106924911              |                        |
| DMRNW_015095244.1:212801 | NW_015095244.1 | 212801 | 216900 | 4100 | 1  | 2.45E-09 | 113 | 2.756 | LOC106924959              |                        |
| DMRNW_015095248.1:201001 | NW_015095248.1 | 201001 | 201800 | 800  | 1  | 1.35E-09 | 47  | 5.875 | LOC106925006              |                        |
| DMRNW_015095250.1:157201 | NW_015095250.1 | 157201 | 160000 | 2800 | 1  | 1.49E-08 | 75  | 2.679 | LOC106925029;LOC106925026 |                        |
| DMRNW_015095254.1:127601 | NW_015095254.1 | 127601 | 128600 | 1000 | 3  | 2.77E-27 | 30  | 3     | kcnq3                     | Transport              |
| DMRNW_015095254.1:195201 | NW_015095254.1 | 195201 | 197700 | 2500 | 1  | 6.01E-09 | 91  | 3.64  | oc90;efr3a                | Metabolism;Development |
| DMRNW_015095254.1:238401 | NW_015095254.1 | 238401 | 240400 | 2000 | 2  | 5.38E-12 | 107 | 5.35  | efr3a                     | Development            |
| DMRNW_015095259.1:72901  | NW_015095259.1 | 72901  | 73300  | 400  | 1  | 4.40E-08 | 17  | 4.25  | ncan                      |                        |
| DMRNW_015095262.1:51701  | NW_015095262.1 | 51701  | 53200  | 1500 | 1  | 2.01E-08 | 15  | 1     | LOC106925147              |                        |
| DMRNW_015095262.1:55801  | NW_015095262.1 | 55801  | 56800  | 1000 | 2  | 1.11E-10 | 19  | 1.9   | LOC106925147;LOC106925155 |                        |

|                          |                |        |        |      |   |          |     |       |                           |               |
|--------------------------|----------------|--------|--------|------|---|----------|-----|-------|---------------------------|---------------|
| DMRNW_015095266.1:191901 | NW_015095266.1 | 191901 | 194200 | 2300 | 1 | 1.82E-09 | 46  | 2     | LOC106925216              |               |
| DMRNW_015095267.1:269201 | NW_015095267.1 | 269201 | 270100 | 900  | 2 | 6.87E-10 | 15  | 1.667 | LOC106925241              |               |
| DMRNW_015095268.1:85601  | NW_015095268.1 | 85601  | 88000  | 2400 | 1 | 2.61E-08 | 73  | 3.042 | rilp1                     | Transcription |
| DMRNW_015095270.1:217801 | NW_015095270.1 | 217801 | 218600 | 800  | 1 | 9.43E-08 | 7   | 0.875 |                           |               |
| DMRNW_015095271.1:110601 | NW_015095271.1 | 110601 | 111000 | 400  | 1 | 3.08E-08 | 11  | 2.75  |                           |               |
| DMRNW_015095275.1:238701 | NW_015095275.1 | 238701 | 239000 | 300  | 1 | 3.39E-08 | 3   | 1     |                           |               |
| DMRNW_015095281.1:15701  | NW_015095281.1 | 15701  | 18300  | 2600 | 1 | 3.66E-08 | 26  | 1     | LOC106925373              |               |
| DMRNW_015095282.1:149901 | NW_015095282.1 | 149901 | 151400 | 1500 | 2 | 2.42E-12 | 61  | 4.067 | LOC106925402              |               |
| DMRNW_015095282.1:182301 | NW_015095282.1 | 182301 | 183700 | 1400 | 1 | 7.33E-13 | 49  | 3.5   | LOC106925402              |               |
| DMRNW_015095283.1:111501 | NW_015095283.1 | 111501 | 112700 | 1200 | 1 | 1.28E-09 | 56  | 4.667 | LOC106925415              |               |
| DMRNW_015095283.1:421201 | NW_015095283.1 | 421201 | 421700 | 500  | 2 | 1.54E-12 | 16  | 3.2   |                           |               |
| DMRNW_015095283.1:474901 | NW_015095283.1 | 474901 | 478000 | 3100 | 3 | 1.01E-10 | 86  | 2.774 |                           |               |
| DMRNW_015095284.1:191901 | NW_015095284.1 | 191901 | 193100 | 1200 | 2 | 5.06E-29 | 21  | 1.75  | LOC106925436              |               |
| DMRNW_015095284.1:196101 | NW_015095284.1 | 196101 | 196600 | 500  | 2 | 1.09E-20 | 1   | 0.2   | LOC106925436              |               |
| DMRNW_015095284.1:247201 | NW_015095284.1 | 247201 | 248300 | 1100 | 1 | 7.90E-11 | 20  | 1.818 | nrip2                     | Transcription |
| DMRNW_015095289.1:94001  | NW_015095289.1 | 94001  | 97900  | 3900 | 3 | 4.97E-13 | 105 | 2.692 |                           |               |
| DMRNW_015095290.1:22301  | NW_015095290.1 | 22301  | 22500  | 200  | 1 | 7.81E-08 | 13  | 6.5   | pc                        |               |
| DMRNW_015095290.1:148901 | NW_015095290.1 | 148901 | 149100 | 200  | 1 | 1.40E-09 | 10  | 5     | pc;LOC106925482           |               |
| DMRNW_015095293.1:79701  | NW_015095293.1 | 79701  | 82200  | 2500 | 5 | 9.03E-30 | 44  | 1.76  |                           |               |
| DMRNW_015095294.1:112301 | NW_015095294.1 | 112301 | 115400 | 3100 | 1 | 7.62E-12 | 173 | 5.581 | taf1c                     |               |
| DMRNW_015095294.1:123201 | NW_015095294.1 | 123201 | 123500 | 300  | 1 | 1.90E-08 | 14  | 4.667 | LOC106925540              |               |
| DMRNW_015095294.1:174501 | NW_015095294.1 | 174501 | 176800 | 2300 | 1 | 2.98E-09 | 101 | 4.391 | LOC106925544              |               |
| DMRNW_015095294.1:183201 | NW_015095294.1 | 183201 | 185200 | 2000 | 2 | 4.91E-39 | 46  | 2.3   | LOC106925544              |               |
| DMRNW_015095294.1:189501 | NW_015095294.1 | 189501 | 190400 | 900  | 2 | 4.56E-09 | 23  | 2.556 | LOC106925544              |               |
| DMRNW_015095294.1:217401 | NW_015095294.1 | 217401 | 218700 | 1300 | 3 | 2.50E-17 | 49  | 3.769 | LOC106925544              |               |
| DMRNW_015095294.1:222101 | NW_015095294.1 | 222101 | 222500 | 400  | 1 | 3.56E-09 | 30  | 7.5   | LOC106925544              |               |
| DMRNW_015095296.1:94201  | NW_015095296.1 | 94201  | 96100  | 1900 | 1 | 1.95E-08 | 23  | 1.211 | st5                       |               |
| DMRNW_015095300.1:146301 | NW_015095300.1 | 146301 | 147300 | 1000 | 1 | 1.83E-08 | 28  | 2.8   | dpy19l3                   | Development   |
| DMRNW_015095303.1:291101 | NW_015095303.1 | 291101 | 291700 | 600  | 1 | 6.20E-10 | 43  | 7.167 |                           |               |
| DMRNW_015095305.1:245301 | NW_015095305.1 | 245301 | 246500 | 1200 | 1 | 2.52E-08 | 44  | 3.667 | LOC106925685              |               |
| DMRNW_015095308.1:41401  | NW_015095308.1 | 41401  | 44600  | 3200 | 3 | 9.21E-12 | 159 | 4.969 | snx29                     | Cytoskeleton  |
| DMRNW_015095308.1:189001 | NW_015095308.1 | 189001 | 189300 | 300  | 2 | 1.94E-10 | 0   | 0     | LOC106925744              |               |
| DMRNW_015095311.1:255101 | NW_015095311.1 | 255101 | 255900 | 800  | 1 | 6.95E-13 | 45  | 5.625 |                           |               |
| DMRNW_015095314.1:174101 | NW_015095314.1 | 174101 | 174300 | 200  | 2 | 4.66E-10 | 5   | 2.5   | LOC106925800              |               |
| DMRNW_015095320.1:2701   | NW_015095320.1 | 2701   | 4200   | 1500 | 1 | 1.78E-16 | 47  | 3.133 |                           |               |
| DMRNW_015095322.1:127801 | NW_015095322.1 | 127801 | 129200 | 1400 | 1 | 2.77E-08 | 15  | 1.071 |                           |               |
| DMRNW_015095324.1:332201 | NW_015095324.1 | 332201 | 333000 | 800  | 1 | 3.25E-09 | 17  | 2.125 | LOC106925931              |               |
| DMRNW_015095326.1:174501 | NW_015095326.1 | 174501 | 184200 | 9700 | 1 | 6.43E-08 | 227 | 2.34  |                           |               |
| DMRNW_015095328.1:227101 | NW_015095328.1 | 227101 | 227900 | 800  | 2 | 2.83E-11 | 15  | 1.875 |                           |               |
| DMRNW_015095329.1:144301 | NW_015095329.1 | 144301 | 144700 | 400  | 1 | 4.77E-08 | 20  | 5     | dlg1                      | Development   |
| DMRNW_015095331.1:1      | NW_015095331.1 | 1      | 500    | 500  | 2 | 1.24E-10 | 26  | 5.2   |                           |               |
| DMRNW_015095339.1:245701 | NW_015095339.1 | 245701 | 247400 | 1700 | 3 | 2.22E-10 | 65  | 3.824 |                           |               |
| DMRNW_015095339.1:253301 | NW_015095339.1 | 253301 | 254383 | 1083 | 3 | 1.98E-10 | 38  | 3.509 |                           |               |
| DMRNW_015095340.1:322901 | NW_015095340.1 | 322901 | 323100 | 200  | 1 | 1.76E-08 | 5   | 2.5   | LOC106926123              |               |
| DMRNW_015095341.1:11301  | NW_015095341.1 | 11301  | 12900  | 1600 | 2 | 3.88E-08 | 53  | 3.312 | trpc1                     | Transport     |
| DMRNW_015095342.1:199501 | NW_015095342.1 | 199501 | 201600 | 2100 | 1 | 1.29E-17 | 57  | 2.714 | wfdc1                     |               |
| DMRNW_015095344.1:72501  | NW_015095344.1 | 72501  | 73200  | 700  | 1 | 1.65E-13 | 41  | 5.857 | LOC106926174              |               |
| DMRNW_015095344.1:143301 | NW_015095344.1 | 143301 | 144600 | 1300 | 1 | 1.67E-10 | 47  | 3.615 | LOC106926176              |               |
| DMRNW_015095344.1:227201 | NW_015095344.1 | 227201 | 228600 | 1400 | 2 | 3.34E-14 | 43  | 3.071 |                           |               |
| DMRNW_015095346.1:284001 | NW_015095346.1 | 284001 | 287100 | 3100 | 1 | 4.08E-08 | 92  | 2.968 | meox2                     | Transcription |
| DMRNW_015095347.1:209901 | NW_015095347.1 | 209901 | 213100 | 3200 | 8 | 9.81E-26 | 195 | 6.094 |                           |               |
| DMRNW_015095347.1:229001 | NW_015095347.1 | 229001 | 232500 | 3500 | 1 | 2.56E-08 | 75  | 2.143 | adam11                    | Protease      |
| DMRNW_015095348.1:49201  | NW_015095348.1 | 49201  | 51800  | 2600 | 1 | 7.52E-09 | 28  | 1.077 | ptpn4;LOC106926213        |               |
| DMRNW_015095348.1:57101  | NW_015095348.1 | 57101  | 59300  | 2200 | 1 | 2.57E-08 | 37  | 1.682 | ptpn4;LOC106926213        |               |
| DMRNW_015095352.1:49301  | NW_015095352.1 | 49301  | 50400  | 1100 | 1 | 8.08E-08 | 27  | 2.455 | LOC106926246;LOC106926247 |               |
| DMRNW_015095352.1:69701  | NW_015095352.1 | 69701  | 75200  | 5500 | 1 | 1.47E-09 | 193 | 3.509 | LOC106926246              |               |
| DMRNW_015095352.1:129501 | NW_015095352.1 | 129501 | 130900 | 1400 | 1 | 8.04E-14 | 33  | 2.357 | LOC106926252              |               |
| DMRNW_015095352.1:145101 | NW_015095352.1 | 145101 | 146000 | 900  | 2 | 9.69E-15 | 37  | 4.111 |                           |               |
| DMRNW_015095353.1:207401 | NW_015095353.1 | 207401 | 209200 | 1800 | 2 | 7.78E-12 | 40  | 2.222 | ttll10                    |               |
| DMRNW_015095355.1:182001 | NW_015095355.1 | 182001 | 182600 | 600  | 1 | 1.44E-09 | 13  | 2.167 | LOC106926300              |               |
| DMRNW_015095356.1:35101  | NW_015095356.1 | 35101  | 35500  | 400  | 1 | 3.09E-08 | 14  | 3.5   |                           |               |
| DMRNW_015095356.1:111601 | NW_015095356.1 | 111601 | 112400 | 800  | 1 | 6.10E-09 | 29  | 3.625 |                           |               |
| DMRNW_015095356.1:117101 | NW_015095356.1 | 117101 | 118400 | 1300 | 3 | 7.48E-13 | 29  | 2.231 | LOC106926305              |               |
| DMRNW_015095356.1:173701 | NW_015095356.1 | 173701 | 173900 | 200  | 1 | 4.65E-08 | 9   | 4.5   |                           |               |
| DMRNW_015095358.1:204901 | NW_015095358.1 | 204901 | 205700 | 800  | 1 | 4.99E-09 | 26  | 3.25  | frmpd3                    |               |
| DMRNW_015095359.1:49301  | NW_015095359.1 | 49301  | 51700  | 2400 | 1 | 2.15E-10 | 69  | 2.875 | capn7                     | Proteolysis   |
| DMRNW_015095364.1:158501 | NW_015095364.1 | 158501 | 160000 | 1500 | 2 | 1.38E-10 | 42  | 2.8   | LOC106926382              |               |
| DMRNW_015095367.1:390801 | NW_015095367.1 | 390801 | 392749 | 1949 | 9 | 2.51E-14 | 37  | 1.898 |                           |               |
| DMRNW_015095369.1:153801 | NW_015095369.1 | 153801 | 156300 | 2500 | 2 | 2.98E-11 | 47  | 1.88  |                           |               |
| DMRNW_015095375.1:1      | NW_015095375.1 | 1      | 400    | 400  | 2 | 4.52E-10 | 9   | 2.25  |                           |               |
| DMRNW_015095377.1:96001  | NW_015095377.1 | 96001  | 96200  | 200  | 1 | 6.24E-08 | 3   | 1.5   | phldb1                    | Signaling     |
| DMRNW_015095388.1:140701 | NW_015095388.1 | 140701 | 142900 | 2200 | 1 | 7.62E-08 | 85  | 3.864 | unc5d                     | Receptor      |
| DMRNW_015095390.1:194901 | NW_015095390.1 | 194901 | 196000 | 1100 | 1 | 3.11E-08 | 15  | 1.364 | LOC106926666;LOC106926662 |               |

|                          |                |        |        |      |   |          |     |       |                           |                      |
|--------------------------|----------------|--------|--------|------|---|----------|-----|-------|---------------------------|----------------------|
| DMRNW_015095390.1:201801 | NW_015095390.1 | 201801 | 203600 | 1800 | 2 | 4.26E-10 | 50  | 2.778 | LOC106926666;LOC106926662 |                      |
| DMRNW_015095393.1:190001 | NW_015095393.1 | 190001 | 198500 | 8500 | 1 | 2.79E-09 | 225 | 2.647 | LOC106926703              |                      |
| DMRNW_015095396.1:162801 | NW_015095396.1 | 162801 | 163200 | 400  | 1 | 5.91E-08 | 28  | 7     | LOC106926728              |                      |
| DMRNW_015095396.1:166201 | NW_015095396.1 | 166201 | 166600 | 400  | 2 | 1.39E-20 | 21  | 5.25  | LOC106926728              |                      |
| DMRNW_015095401.1:171201 | NW_015095401.1 | 171201 | 172100 | 900  | 3 | 2.18E-22 | 30  | 3.333 |                           |                      |
| DMRNW_015095408.1:139501 | NW_015095408.1 | 139501 | 140300 | 800  | 1 | 1.55E-09 | 34  | 4.25  | samd12                    | Unknown              |
| DMRNW_015095409.1:14101  | NW_015095409.1 | 14101  | 15400  | 1300 | 1 | 1.43E-12 | 27  | 2.077 | LOC106926857;LOC106926855 |                      |
| DMRNW_015095416.1:176601 | NW_015095416.1 | 176601 | 177900 | 1300 | 1 | 1.07E-19 | 45  | 3.462 | plac8                     |                      |
| DMRNW_015095419.1:246801 | NW_015095419.1 | 246801 | 247100 | 300  | 1 | 2.70E-08 | 1   | 0.333 |                           |                      |
| DMRNW_015095426.1:30301  | NW_015095426.1 | 30301  | 34500  | 4200 | 1 | 1.50E-08 | 201 | 4.786 | slc1a3                    | Metabolism           |
| DMRNW_015095426.1:130901 | NW_015095426.1 | 130901 | 132300 | 1400 | 1 | 1.36E-14 | 79  | 5.643 | LOC106927058;scail        | EST                  |
| DMRNW_015095426.1:196001 | NW_015095426.1 | 196001 | 199500 | 3500 | 1 | 8.50E-08 | 207 | 5.914 | LOC106927060              |                      |
| DMRNW_015095432.1:201    | NW_015095432.1 | 201    | 1500   | 1300 | 2 | 4.46E-12 | 46  | 3.538 | LOC106927110              |                      |
| DMRNW_015095432.1:15701  | NW_015095432.1 | 15701  | 16700  | 1000 | 1 | 1.23E-10 | 25  | 2.5   | LOC106927110              |                      |
| DMRNW_015095432.1:27001  | NW_015095432.1 | 27001  | 28400  | 1400 | 3 | 4.60E-21 | 30  | 2.143 | LOC106927110              |                      |
| DMRNW_015095432.1:30201  | NW_015095432.1 | 30201  | 30500  | 300  | 1 | 2.33E-08 | 4   | 1.333 |                           |                      |
| DMRNW_015095432.1:44901  | NW_015095432.1 | 44901  | 46200  | 1300 | 2 | 1.78E-11 | 61  | 4.692 | LOC106927112              |                      |
| DMRNW_015095433.1:96801  | NW_015095433.1 | 96801  | 101200 | 4400 | 2 | 4.42E-09 | 128 | 2.909 | prickle2                  | Cytoskeleton         |
| DMRNW_015095434.1:35001  | NW_015095434.1 | 35001  | 35500  | 500  | 3 | 2.95E-15 | 26  | 5.2   |                           |                      |
| DMRNW_015095434.1:204201 | NW_015095434.1 | 204201 | 206800 | 2600 | 1 | 4.36E-09 | 68  | 2.615 |                           |                      |
| DMRNW_015095434.1:213901 | NW_015095434.1 | 213901 | 215800 | 1900 | 2 | 3.71E-10 | 34  | 1.789 |                           |                      |
| DMRNW_015095436.1:199001 | NW_015095436.1 | 199001 | 201500 | 2500 | 6 | 1.13E-59 | 39  | 1.56  |                           |                      |
| DMRNW_015095437.1:121601 | NW_015095437.1 | 121601 | 123500 | 1900 | 2 | 1.62E-13 | 57  | 3     | LOC106927194              |                      |
| DMRNW_015095440.1:207101 | NW_015095440.1 | 207101 | 210100 | 3000 | 2 | 5.33E-20 | 59  | 1.967 | tmem94                    |                      |
| DMRNW_015095442.1:47201  | NW_015095442.1 | 47201  | 48400  | 1200 | 2 | 4.78E-13 | 8   | 0.667 |                           |                      |
| DMRNW_015095442.1:51701  | NW_015095442.1 | 51701  | 52600  | 900  | 1 | 6.43E-08 | 22  | 2.444 |                           |                      |
| DMRNW_015095442.1:54101  | NW_015095442.1 | 54101  | 55900  | 1800 | 6 | 6.16E-28 | 16  | 0.889 |                           |                      |
| DMRNW_015095444.1:105501 | NW_015095444.1 | 105501 | 107500 | 2000 | 2 | 2.49E-14 | 36  | 1.8   | vav3                      | Signaling            |
| DMRNW_015095447.1:61001  | NW_015095447.1 | 61001  | 61200  | 200  | 1 | 1.34E-08 | 10  | 5     |                           |                      |
| DMRNW_015095448.1:192301 | NW_015095448.1 | 192301 | 193200 | 900  | 1 | 4.33E-09 | 30  | 3.333 | LOC106927306              |                      |
| DMRNW_015095459.1:60401  | NW_015095459.1 | 60401  | 61000  | 600  | 1 | 7.17E-08 | 24  | 4     | LOC106927424              |                      |
| DMRNW_015095461.1:194101 | NW_015095461.1 | 194101 | 196700 | 2600 | 5 | 1.32E-13 | 83  | 3.192 | LOC106927450              |                      |
| DMRNW_015095464.1:178501 | NW_015095464.1 | 178501 | 181100 | 2600 | 4 | 9.30E-11 | 115 | 4.423 | nckap5                    |                      |
| DMRNW_015095465.1:99001  | NW_015095465.1 | 99001  | 100800 | 1800 | 1 | 1.56E-13 | 50  | 2.778 | sdccag8                   |                      |
| DMRNW_015095465.1:356801 | NW_015095465.1 | 356801 | 358400 | 1600 | 1 | 7.19E-09 | 36  | 2.25  | LOC106927530              |                      |
| DMRNW_015095466.1:10401  | NW_015095466.1 | 10401  | 11900  | 1500 | 2 | 7.01E-23 | 47  | 3.133 | LOC106927541              |                      |
| DMRNW_015095468.1:88101  | NW_015095468.1 | 88101  | 89300  | 1200 | 1 | 2.45E-08 | 44  | 3.667 | gsk3b                     | Signaling            |
| DMRNW_015095469.1:6601   | NW_015095469.1 | 6601   | 8200   | 1600 | 1 | 2.21E-09 | 17  | 1.062 |                           |                      |
| DMRNW_015095471.1:167601 | NW_015095471.1 | 167601 | 174400 | 6800 | 2 | 3.42E-08 | 54  | 0.794 |                           |                      |
| DMRNW_015095471.1:236901 | NW_015095471.1 | 236901 | 239200 | 2300 | 2 | 4.59E-26 | 47  | 2.043 |                           |                      |
| DMRNW_015095473.1:212501 | NW_015095473.1 | 212501 | 212800 | 300  | 2 | 3.85E-11 | 15  | 5     |                           |                      |
| DMRNW_015095474.1:299301 | NW_015095474.1 | 299301 | 300700 | 1400 | 1 | 2.85E-08 | 45  | 3.214 | LOC106927654              |                      |
| DMRNW_015095475.1:188401 | NW_015095475.1 | 188401 | 188800 | 400  | 2 | 8.40E-10 | 4   | 1     |                           |                      |
| DMRNW_015095476.1:61401  | NW_015095476.1 | 61401  | 63500  | 2100 | 2 | 4.71E-09 | 45  | 2.143 |                           |                      |
| DMRNW_015095477.1:38801  | NW_015095477.1 | 38801  | 41900  | 3100 | 5 | 7.22E-21 | 47  | 1.516 | LOC106927690              |                      |
| DMRNW_015095479.1:12501  | NW_015095479.1 | 12501  | 12800  | 300  | 2 | 3.67E-08 | 12  | 4     |                           |                      |
| DMRNW_015095483.1:75401  | NW_015095483.1 | 75401  | 76200  | 800  | 1 | 7.44E-09 | 30  | 3.75  | thop1                     | Protease             |
| DMRNW_015095484.1:182301 | NW_015095484.1 | 182301 | 184500 | 2200 | 1 | 7.93E-08 | 31  | 1.409 |                           |                      |
| DMRNW_015095487.1:179101 | NW_015095487.1 | 179101 | 181400 | 2300 | 1 | 1.65E-08 | 60  | 2.609 | stard10                   | Golgi                |
| DMRNW_015095491.1:275901 | NW_015095491.1 | 275901 | 276500 | 600  | 1 | 3.61E-08 | 9   | 1.5   |                           |                      |
| DMRNW_015095494.1:53601  | NW_015095494.1 | 53601  | 55600  | 2000 | 1 | 3.42E-08 | 39  | 1.95  |                           |                      |
| DMRNW_015095495.1:40801  | NW_015095495.1 | 40801  | 43800  | 3000 | 1 | 1.65E-08 | 43  | 1.433 |                           |                      |
| DMRNW_015095495.1:215001 | NW_015095495.1 | 215001 | 219200 | 4200 | 1 | 7.98E-09 | 130 | 3.095 |                           |                      |
| DMRNW_015095503.1:25401  | NW_015095503.1 | 25401  | 30000  | 4600 | 1 | 1.68E-10 | 115 | 2.5   | LOC106927986              |                      |
| DMRNW_015095506.1:23001  | NW_015095506.1 | 23001  | 30000  | 7000 | 1 | 1.20E-09 | 149 | 2.129 | LOC106928028              |                      |
| DMRNW_015095511.1:190101 | NW_015095511.1 | 190101 | 190800 | 700  | 2 | 2.13E-12 | 16  | 2.286 |                           |                      |
| DMRNW_015095512.1:165601 | NW_015095512.1 | 165601 | 166800 | 1200 | 2 | 5.51E-16 | 35  | 2.917 |                           |                      |
| DMRNW_015095517.1:43501  | NW_015095517.1 | 43501  | 44000  | 500  | 2 | 5.10E-15 | 0   | 0     | rasal2                    | Signaling            |
| DMRNW_015095518.1:68301  | NW_015095518.1 | 68301  | 69100  | 800  | 1 | 1.70E-09 | 30  | 3.75  | LOC106928176              |                      |
| DMRNW_015095524.1:261601 | NW_015095524.1 | 261601 | 264800 | 3200 | 1 | 5.92E-16 | 39  | 1.219 | man1a1                    | Golgi                |
| DMRNW_015095527.1:108501 | NW_015095527.1 | 108501 | 109800 | 1300 | 1 | 5.25E-08 | 39  | 3     | LOC106928301              |                      |
| DMRNW_015095533.1:126501 | NW_015095533.1 | 126501 | 129200 | 2700 | 1 | 7.64E-08 | 91  | 3.37  | LOC106928348              |                      |
| DMRNW_015095538.1:71301  | NW_015095538.1 | 71301  | 73300  | 2000 | 1 | 3.33E-09 | 28  | 1.4   |                           |                      |
| DMRNW_015095538.1:118301 | NW_015095538.1 | 118301 | 118500 | 200  | 1 | 4.64E-08 | 5   | 2.5   | asap3                     | Transcription        |
| DMRNW_015095538.1:171901 | NW_015095538.1 | 171901 | 174600 | 2700 | 1 | 1.87E-12 | 63  | 2.333 | LOC106928442              |                      |
| DMRNW_015095543.1:103701 | NW_015095543.1 | 103701 | 110000 | 6300 | 1 | 5.41E-08 | 155 | 2.46  | arhgap23                  | Signaling            |
| DMRNW_015095544.1:1      | NW_015095544.1 | 1      | 3200   | 3200 | 1 | 1.95E-10 | 77  | 2.406 | LOC106928514              |                      |
| DMRNW_015095547.1:174501 | NW_015095547.1 | 174501 | 177600 | 3100 | 1 | 2.25E-11 | 108 | 3.484 | LOC106928576              |                      |
| DMRNW_015095549.1:126101 | NW_015095549.1 | 126101 | 127600 | 1500 | 1 | 6.43E-09 | 35  | 2.333 |                           |                      |
| DMRNW_015095550.1:215301 | NW_015095550.1 | 215301 | 216600 | 1300 | 1 | 2.00E-09 | 49  | 3.769 |                           |                      |
| DMRNW_015095559.1:206301 | NW_015095559.1 | 206301 | 206600 | 300  | 1 | 5.98E-08 | 4   | 1.333 | thsd7a                    | Extracellular Matrix |
| DMRNW_015095568.1:67601  | NW_015095568.1 | 67601  | 68300  | 700  | 1 | 8.93E-08 | 35  | 5     | adcyl8                    | Signaling            |
| DMRNW_015095568.1:133701 | NW_015095568.1 | 133701 | 136200 | 2500 | 1 | 5.15E-09 | 64  | 2.56  | adcyl8                    | Signaling            |
| DMRNW_015095568.1:202001 | NW_015095568.1 | 202001 | 202400 | 400  | 2 | 2.63E-13 | 12  | 3     | baspl                     |                      |

|                          |                |        |        |      |    |          |     |       |                           |                      |
|--------------------------|----------------|--------|--------|------|----|----------|-----|-------|---------------------------|----------------------|
| DMRNW_015095568.1:207501 | NW_015095568.1 | 207501 | 210300 | 2800 | 1  | 2.07E-08 | 63  | 2.25  | basp1                     |                      |
| DMRNW_015095569.1:61901  | NW_015095569.1 | 61901  | 62400  | 500  | 1  | 4.45E-08 | 15  | 3     | LOC106928782              |                      |
| DMRNW_015095575.1:21701  | NW_015095575.1 | 21701  | 22300  | 600  | 4  | 4.67E-11 | 3   | 0.5   |                           |                      |
| DMRNW_015095582.1:76901  | NW_015095582.1 | 76901  | 78100  | 1200 | 1  | 1.80E-11 | 35  | 2.917 | slit3                     | Development          |
| DMRNW_015095582.1:84001  | NW_015095582.1 | 84001  | 84400  | 400  | 2  | 6.23E-09 | 29  | 7.25  | slit3                     | Development          |
| DMRNW_015095584.1:14101  | NW_015095584.1 | 14101  | 15400  | 1300 | 1  | 8.47E-09 | 46  | 3.538 |                           |                      |
| DMRNW_015095590.1:157601 | NW_015095590.1 | 157601 | 157900 | 300  | 1  | 5.11E-08 | 16  | 5.333 | col11a1                   |                      |
| DMRNW_015095590.1:163601 | NW_015095590.1 | 163601 | 165300 | 1700 | 4  | 1.39E-12 | 48  | 2.824 | col11a1                   |                      |
| DMRNW_015095596.1:81601  | NW_015095596.1 | 81601  | 81800  | 200  | 1  | 2.94E-10 | 10  | 5     | LOC106929091              |                      |
| DMRNW_015095605.1:11701  | NW_015095605.1 | 11701  | 12400  | 700  | 2  | 6.06E-28 | 41  | 5.857 | LOC106929151;LOC106929152 |                      |
| DMRNW_015095607.1:172101 | NW_015095607.1 | 172101 | 173200 | 1100 | 1  | 4.18E-09 | 43  | 3.909 | LOC106929163              |                      |
| DMRNW_015095616.1:11001  | NW_015095616.1 | 11001  | 13200  | 2200 | 1  | 1.13E-08 | 30  | 1.364 | LOC106929241              |                      |
| DMRNW_015095620.1:158701 | NW_015095620.1 | 158701 | 158900 | 200  | 1  | 1.36E-11 | 7   | 3.5   |                           |                      |
| DMRNW_015095625.1:216801 | NW_015095625.1 | 216801 | 219500 | 2700 | 1  | 5.68E-11 | 87  | 3.222 | LOC106929339              |                      |
| DMRNW_015095626.1:74901  | NW_015095626.1 | 74901  | 78300  | 3400 | 6  | 3.81E-32 | 105 | 3.088 | dab1                      | Signaling            |
| DMRNW_015095627.1:30701  | NW_015095627.1 | 30701  | 35600  | 4900 | 1  | 4.47E-08 | 48  | 0.98  | LOC106929358              |                      |
| DMRNW_015095633.1:25001  | NW_015095633.1 | 25001  | 25600  | 600  | 2  | 4.10E-11 | 13  | 2.167 |                           |                      |
| DMRNW_015095638.1:42701  | NW_015095638.1 | 42701  | 44700  | 2000 | 1  | 1.43E-08 | 46  | 2.3   | rmnd3                     |                      |
| DMRNW_015095640.1:157801 | NW_015095640.1 | 157801 | 160100 | 2300 | 2  | 1.02E-08 | 95  | 4.13  | dcc                       | Receptor             |
| DMRNW_015095670.1:146101 | NW_015095670.1 | 146101 | 146300 | 200  | 1  | 6.26E-08 | 0   | 0     | igsf21                    | Immune               |
| DMRNW_015095672.1:98701  | NW_015095672.1 | 98701  | 101400 | 2700 | 3  | 7.03E-12 | 80  | 2.963 | scara5                    | Unknown              |
| DMRNW_015095673.1:88701  | NW_015095673.1 | 88701  | 91000  | 2300 | 3  | 3.17E-11 | 32  | 1.391 | LOC106929732              |                      |
| DMRNW_015095673.1:168101 | NW_015095673.1 | 168101 | 172200 | 4100 | 1  | 4.44E-08 | 58  | 1.415 |                           |                      |
| DMRNW_015095675.1:83101  | NW_015095675.1 | 83101  | 92700  | 9600 | 2  | 7.34E-10 | 313 | 3.26  |                           |                      |
| DMRNW_015095675.1:231401 | NW_015095675.1 | 231401 | 234700 | 3300 | 2  | 1.96E-14 | 76  | 2.303 | LOC106929746              |                      |
| DMRNW_015095675.1:256901 | NW_015095675.1 | 256901 | 258300 | 1400 | 3  | 7.10E-27 | 57  | 4.071 | LOC106929745              |                      |
| DMRNW_015095677.1:5501   | NW_015095677.1 | 5501   | 7400   | 1900 | 1  | 6.90E-08 | 49  | 2.579 | LOC106929781              |                      |
| DMRNW_015095685.1:66501  | NW_015095685.1 | 66501  | 67600  | 1100 | 2  | 2.44E-17 | 28  | 2.545 |                           |                      |
| DMRNW_015095686.1:92401  | NW_015095686.1 | 92401  | 93000  | 600  | 3  | 5.36E-17 | 18  | 3     | dhx32                     | Transcription        |
| DMRNW_015095691.1:305801 | NW_015095691.1 | 305801 | 306400 | 600  | 2  | 2.88E-15 | 28  | 4.667 | LOC106929874              |                      |
| DMRNW_015095695.1:94601  | NW_015095695.1 | 94601  | 96000  | 1400 | 1  | 1.53E-08 | 24  | 1.714 |                           |                      |
| DMRNW_015095700.1:38301  | NW_015095700.1 | 38301  | 39700  | 1400 | 1  | 9.38E-09 | 50  | 3.571 | LOC106929945              |                      |
| DMRNW_015095703.1:124701 | NW_015095703.1 | 124701 | 126900 | 2200 | 1  | 1.70E-08 | 45  | 2.045 | LOC106929981;LOC106929980 |                      |
| DMRNW_015095705.1:26001  | NW_015095705.1 | 26001  | 26600  | 600  | 1  | 1.41E-08 | 13  | 2.167 |                           |                      |
| DMRNW_015095709.1:168901 | NW_015095709.1 | 168901 | 170100 | 1200 | 1  | 1.00E-08 | 29  | 2.417 | zdhhc13                   | Transcription        |
| DMRNW_015095716.1:159601 | NW_015095716.1 | 159601 | 160500 | 900  | 1  | 4.17E-08 | 14  | 1.556 | LOC106930123              |                      |
| DMRNW_015095718.1:53701  | NW_015095718.1 | 53701  | 54600  | 900  | 1  | 2.51E-09 | 24  | 2.667 | LOC106930140              |                      |
| DMRNW_015095719.1:174101 | NW_015095719.1 | 174101 | 174700 | 600  | 1  | 3.06E-08 | 14  | 2.333 | LOC106930150              |                      |
| DMRNW_015095720.1:51401  | NW_015095720.1 | 51401  | 52000  | 600  | 1  | 4.79E-08 | 8   | 1.333 |                           |                      |
| DMRNW_015095721.1:74201  | NW_015095721.1 | 74201  | 74800  | 600  | 2  | 9.69E-12 | 23  | 3.833 |                           |                      |
| DMRNW_015095722.1:153901 | NW_015095722.1 | 153901 | 155800 | 1900 | 4  | 1.77E-13 | 32  | 1.684 |                           |                      |
| DMRNW_015095728.1:50901  | NW_015095728.1 | 50901  | 53300  | 2400 | 9  | 2.87E-13 | 82  | 3.417 |                           |                      |
| DMRNW_015095729.1:1001   | NW_015095729.1 | 1001   | 1800   | 800  | 3  | 4.59E-11 | 35  | 4.375 |                           |                      |
| DMRNW_015095734.1:177901 | NW_015095734.1 | 177901 | 184100 | 6200 | 1  | 2.35E-10 | 259 | 4.177 |                           |                      |
| DMRNW_015095734.1:188501 | NW_015095734.1 | 188501 | 192300 | 3800 | 1  | 1.40E-10 | 145 | 3.816 |                           |                      |
| DMRNW_015095738.1:96301  | NW_015095738.1 | 96301  | 99700  | 3400 | 4  | 1.57E-12 | 98  | 2.882 | LOC106930345              |                      |
| DMRNW_015095740.1:28201  | NW_015095740.1 | 28201  | 28500  | 300  | 1  | 1.56E-09 | 3   | 1     |                           |                      |
| DMRNW_015095740.1:311001 | NW_015095740.1 | 311001 | 313200 | 2200 | 1  | 5.87E-10 | 77  | 3.5   | itga11                    | Extracellular Matrix |
| DMRNW_015095743.1:97201  | NW_015095743.1 | 97201  | 99800  | 2600 | 3  | 1.10E-09 | 59  | 2.269 | LOC106930392              |                      |
| DMRNW_015095745.1:165701 | NW_015095745.1 | 165701 | 166900 | 1200 | 3  | 5.20E-30 | 28  | 2.333 | socs5                     | Signaling            |
| DMRNW_015095749.1:162101 | NW_015095749.1 | 162101 | 162400 | 300  | 1  | 2.54E-10 | 3   | 1     | LOC106930467;ccnj         | Cell Cycle           |
| DMRNW_015095750.1:30301  | NW_015095750.1 | 30301  | 32600  | 2300 | 1  | 4.79E-09 | 42  | 1.826 | apeh;LOC106930470         | Protease             |
| DMRNW_015095751.1:106001 | NW_015095751.1 | 106001 | 112900 | 6900 | 3  | 5.03E-22 | 262 | 3.797 | efnb1;LOC106930480        | Signaling            |
| DMRNW_015095760.1:157401 | NW_015095760.1 | 157401 | 157700 | 300  | 2  | 2.48E-15 | 1   | 0.333 |                           |                      |
| DMRNW_015095763.1:22601  | NW_015095763.1 | 22601  | 26400  | 3800 | 1  | 6.54E-08 | 94  | 2.474 | plbd1                     | EST                  |
| DMRNW_015095763.1:157901 | NW_015095763.1 | 157901 | 160000 | 2100 | 1  | 5.38E-08 | 60  | 2.857 | rangap1                   | Signaling            |
| DMRNW_015095763.1:162401 | NW_015095763.1 | 162401 | 166500 | 4100 | 1  | 4.14E-08 | 95  | 2.317 | rangap1;LOC106930563      | Signaling            |
| DMRNW_015095769.1:13601  | NW_015095769.1 | 13601  | 16700  | 3100 | 11 | 1.15E-15 | 55  | 1.774 |                           |                      |
| DMRNW_015095769.1:24401  | NW_015095769.1 | 24401  | 28300  | 3900 | 5  | 3.44E-16 | 68  | 1.744 | LOC106930616              |                      |
| DMRNW_015095772.1:54301  | NW_015095772.1 | 54301  | 54700  | 400  | 1  | 1.47E-08 | 14  | 3.5   | adgra3                    |                      |
| DMRNW_015095775.1:118401 | NW_015095775.1 | 118401 | 119300 | 900  | 1  | 3.26E-08 | 52  | 5.778 | frmd5                     | Signaling            |
| DMRNW_015095779.1:150201 | NW_015095779.1 | 150201 | 151500 | 1300 | 1  | 5.95E-08 | 24  | 1.846 |                           |                      |
| DMRNW_015095784.1:143501 | NW_015095784.1 | 143501 | 148700 | 5200 | 2  | 3.71E-22 | 151 | 2.904 | LOC106930697;LOC106930698 |                      |
| DMRNW_015095792.1:215101 | NW_015095792.1 | 215101 | 215200 | 100  | 1  | 1.91E-09 | 4   | 4     | LOC106930752              |                      |
| DMRNW_015095793.1:52101  | NW_015095793.1 | 52101  | 54600  | 2500 | 1  | 9.43E-08 | 78  | 3.12  |                           |                      |
| DMRNW_015095796.1:128601 | NW_015095796.1 | 128601 | 129100 | 500  | 1  | 3.29E-08 | 12  | 2.4   |                           |                      |
| DMRNW_015095796.1:230001 | NW_015095796.1 | 230001 | 231700 | 1700 | 1  | 1.15E-08 | 49  | 2.882 |                           |                      |
| DMRNW_015095797.1:45101  | NW_015095797.1 | 45101  | 45900  | 800  | 1  | 7.33E-08 | 16  | 2     | LOC106930772              |                      |
| DMRNW_015095798.1:82701  | NW_015095798.1 | 82701  | 83200  | 500  | 1  | 9.21E-21 | 13  | 2.6   |                           |                      |
| DMRNW_015095800.1:143501 | NW_015095800.1 | 143501 | 147600 | 4100 | 1  | 3.85E-09 | 93  | 2.268 |                           |                      |
| DMRNW_015095801.1:171101 | NW_015095801.1 | 171101 | 172200 | 1100 | 1  | 2.11E-11 | 41  | 3.727 |                           |                      |
| DMRNW_015095803.1:162201 | NW_015095803.1 | 162201 | 164900 | 2700 | 3  | 1.16E-16 | 36  | 1.333 |                           |                      |
| DMRNW_015095808.1:13801  | NW_015095808.1 | 13801  | 15700  | 1900 | 1  | 1.71E-11 | 48  | 2.526 | fam159a                   |                      |
| DMRNW_015095808.1:56401  | NW_015095808.1 | 56401  | 61200  | 4800 | 1  | 2.19E-08 | 146 | 3.042 | slc1a7                    | Transport            |

|                          |                |        |        |      |    |          |     |       |                           |               |
|--------------------------|----------------|--------|--------|------|----|----------|-----|-------|---------------------------|---------------|
| DMRNW_015095810.1:52301  | NW_015095810.1 | 52301  | 57800  | 5500 | 10 | 9.24E-30 | 140 | 2.545 | LOC106930858;LOC106930860 |               |
| DMRNW_015095813.1:72001  | NW_015095813.1 | 72001  | 72300  | 300  | 1  | 6.82E-08 | 11  | 3.667 | LOC106930887;fam65c       |               |
| DMRNW_015095822.1:142901 | NW_015095822.1 | 142901 | 143600 | 700  | 2  | 2.10E-10 | 52  | 7.429 | gnal                      | Signaling     |
| DMRNW_015095824.1:18601  | NW_015095824.1 | 18601  | 18800  | 200  | 1  | 3.30E-08 | 5   | 2.5   | LOC106930984              |               |
| DMRNW_015095824.1:38301  | NW_015095824.1 | 38301  | 40700  | 2400 | 1  | 2.03E-17 | 69  | 2.875 | LOC106930984;mtmr7        | Signaling     |
| DMRNW_015095828.1:37201  | NW_015095828.1 | 37201  | 40700  | 3500 | 1  | 2.56E-08 | 19  | 0.543 |                           |               |
| DMRNW_015095831.1:50001  | NW_015095831.1 | 50001  | 50400  | 400  | 1  | 1.95E-08 | 17  | 4.25  |                           |               |
| DMRNW_015095841.1:110601 | NW_015095841.1 | 110601 | 111100 | 500  | 1  | 5.59E-12 | 12  | 2.4   |                           |               |
| DMRNW_015095842.1:76001  | NW_015095842.1 | 76001  | 76800  | 800  | 1  | 2.31E-08 | 6   | 0.75  |                           |               |
| DMRNW_015095860.1:159401 | NW_015095860.1 | 159401 | 159700 | 300  | 1  | 7.14E-10 | 28  | 9.333 | LOC106931294              |               |
| DMRNW_015095870.1:25001  | NW_015095870.1 | 25001  | 28100  | 3100 | 3  | 6.03E-27 | 44  | 1.419 | larp4                     |               |
| DMRNW_015095874.1:133501 | NW_015095874.1 | 133501 | 133800 | 300  | 1  | 6.15E-14 | 9   | 3     | abcd2                     | Transport     |
| DMRNW_015095875.1:271201 | NW_015095875.1 | 271201 | 273700 | 2500 | 3  | 1.44E-10 | 48  | 1.92  | LOC106931407              |               |
| DMRNW_015095879.1:73901  | NW_015095879.1 | 73901  | 76200  | 2300 | 1  | 1.64E-08 | 56  | 2.435 |                           |               |
| DMRNW_015095881.1:35901  | NW_015095881.1 | 35901  | 36400  | 500  | 1  | 2.03E-12 | 12  | 2.4   | LOC106931474              |               |
| DMRNW_015095883.1:86101  | NW_015095883.1 | 86101  | 88300  | 2200 | 1  | 8.57E-08 | 52  | 2.364 | rfx6                      | Transcription |
| DMRNW_015095886.1:51101  | NW_015095886.1 | 51101  | 52400  | 1300 | 2  | 1.23E-09 | 22  | 1.692 | LOC106931523              |               |
| DMRNW_015095888.1:126101 | NW_015095888.1 | 126101 | 127300 | 1200 | 1  | 9.02E-11 | 30  | 2.5   | dhx36                     | Transcription |
| DMRNW_015095901.1:24201  | NW_015095901.1 | 24201  | 26100  | 1900 | 1  | 6.77E-09 | 47  | 2.474 | LOC106931604              |               |
| DMRNW_015095903.1:52501  | NW_015095903.1 | 52501  | 55400  | 2900 | 2  | 2.39E-09 | 61  | 2.103 | epha4                     | Receptor      |
| DMRNW_015095903.1:93901  | NW_015095903.1 | 93901  | 95700  | 1800 | 1  | 6.07E-09 | 40  | 2.222 | epha4                     | Receptor      |
| DMRNW_015095904.1:80401  | NW_015095904.1 | 80401  | 81900  | 1500 | 1  | 2.72E-08 | 41  | 2.733 | LOC106931627              |               |
| DMRNW_015095936.1:132601 | NW_015095936.1 | 132601 | 133200 | 600  | 1  | 8.31E-08 | 19  | 3.167 | LOC106931880              |               |
| DMRNW_015095941.1:145701 | NW_015095941.1 | 145701 | 152100 | 6400 | 1  | 6.84E-08 | 143 | 2.234 |                           |               |
| DMRNW_015095941.1:268601 | NW_015095941.1 | 268601 | 269400 | 800  | 3  | 4.18E-24 | 47  | 5.875 | larp1                     |               |
| DMRNW_015095941.1:274601 | NW_015095941.1 | 274601 | 276800 | 2200 | 2  | 2.59E-18 | 83  | 3.773 | larp1                     |               |
| DMRNW_015095946.1:41701  | NW_015095946.1 | 41701  | 42300  | 600  | 1  | 5.94E-08 | 24  | 4     | LOC106931940              |               |
| DMRNW_015095951.1:188201 | NW_015095951.1 | 188201 | 189000 | 800  | 1  | 1.63E-14 | 11  | 1.375 | sccpdh;LOC106931980       | Metabolism    |
| DMRNW_015095955.1:144601 | NW_015095955.1 | 144601 | 149800 | 5200 | 1  | 1.23E-08 | 171 | 3.288 | LOC106932019              |               |
| DMRNW_015095976.1:204501 | NW_015095976.1 | 204501 | 206900 | 2400 | 2  | 1.07E-10 | 47  | 1.958 | tpd52l2                   |               |
| DMRNW_015095982.1:14001  | NW_015095982.1 | 14001  | 15000  | 1000 | 2  | 3.81E-19 | 12  | 1.2   |                           |               |
| DMRNW_015095985.1:92701  | NW_015095985.1 | 92701  | 94500  | 1800 | 1  | 2.40E-09 | 65  | 3.611 | LOC106932256              |               |
| DMRNW_015095992.1:63901  | NW_015095992.1 | 63901  | 67200  | 3300 | 1  | 7.23E-08 | 103 | 3.121 | kank1                     | Transcription |
| DMRNW_015096001.1:186101 | NW_015096001.1 | 186101 | 187200 | 1100 | 1  | 3.37E-22 | 24  | 2.182 |                           |               |
| DMRNW_015096004.1:1      | NW_015096004.1 | 1      | 1200   | 1200 | 2  | 2.76E-09 | 7   | 0.583 |                           |               |
| DMRNW_015096004.1:6301   | NW_015096004.1 | 6301   | 8100   | 1800 | 1  | 3.01E-12 | 7   | 0.389 |                           |               |
| DMRNW_015096008.1:23201  | NW_015096008.1 | 23201  | 25300  | 2100 | 1  | 5.90E-08 | 80  | 3.81  | shank1                    | Development   |
| DMRNW_015096008.1:114301 | NW_015096008.1 | 114301 | 120200 | 5900 | 1  | 6.78E-09 | 257 | 4.356 | LOC106932447              |               |
| DMRNW_015096009.1:66101  | NW_015096009.1 | 66101  | 68200  | 2100 | 1  | 1.71E-08 | 36  | 1.714 | LOC106932450              |               |
| DMRNW_015096020.1:91101  | NW_015096020.1 | 91101  | 93800  | 2700 | 1  | 1.17E-08 | 63  | 2.333 | mia3                      |               |
| DMRNW_015096025.1:88801  | NW_015096025.1 | 88801  | 89200  | 400  | 1  | 1.17E-10 | 26  | 6.5   | LOC106932561              |               |
| DMRNW_015096028.1:64401  | NW_015096028.1 | 64401  | 69400  | 5000 | 1  | 3.83E-08 | 159 | 3.18  | atp2b3                    | Transport     |
| DMRNW_015096036.1:152701 | NW_015096036.1 | 152701 | 154200 | 1500 | 1  | 4.82E-08 | 59  | 3.933 | rbpj                      |               |
| DMRNW_015096040.1:51901  | NW_015096040.1 | 51901  | 53900  | 2000 | 2  | 3.92E-36 | 97  | 4.85  | LOC106932722              |               |
| DMRNW_015096040.1:128701 | NW_015096040.1 | 128701 | 129300 | 600  | 1  | 8.73E-12 | 33  | 5.5   |                           |               |
| DMRNW_015096040.1:131801 | NW_015096040.1 | 131801 | 133700 | 1900 | 2  | 4.57E-42 | 40  | 2.105 |                           |               |
| DMRNW_015096044.1:109501 | NW_015096044.1 | 109501 | 110800 | 1300 | 1  | 1.01E-15 | 32  | 2.462 |                           |               |
| DMRNW_015096044.1:133501 | NW_015096044.1 | 133501 | 134500 | 1000 | 1  | 4.68E-09 | 47  | 4.7   |                           |               |
| DMRNW_015096046.1:6401   | NW_015096046.1 | 6401   | 9500   | 3100 | 1  | 5.19E-08 | 73  | 2.355 | LOC106932768;LOC106932769 |               |
| DMRNW_015096047.1:20101  | NW_015096047.1 | 20101  | 22000  | 1900 | 2  | 7.98E-12 | 57  | 3     |                           |               |
| DMRNW_015096053.1:83601  | NW_015096053.1 | 83601  | 85800  | 2200 | 1  | 4.16E-08 | 52  | 2.364 | LOC106932835              |               |
| DMRNW_015096055.1:117301 | NW_015096055.1 | 117301 | 119000 | 1700 | 1  | 1.06E-09 | 43  | 2.529 | LOC106932843              |               |
| DMRNW_015096057.1:55401  | NW_015096057.1 | 55401  | 59500  | 4100 | 2  | 8.91E-10 | 141 | 3.439 |                           |               |
| DMRNW_015096057.1:144101 | NW_015096057.1 | 144101 | 144400 | 300  | 1  | 4.15E-10 | 2   | 0.667 |                           |               |
| DMRNW_015096057.1:146201 | NW_015096057.1 | 146201 | 146500 | 300  | 1  | 4.34E-08 | 6   | 2     |                           |               |
| DMRNW_015096063.1:49701  | NW_015096063.1 | 49701  | 49900  | 200  | 2  | 6.05E-08 | 4   | 2     | LOC106932889              |               |
| DMRNW_015096066.1:34701  | NW_015096066.1 | 34701  | 35900  | 1200 | 1  | 3.24E-14 | 28  | 2.333 | iqgap1                    | Signaling     |
| DMRNW_015096066.1:181501 | NW_015096066.1 | 181501 | 182800 | 1300 | 1  | 3.21E-09 | 22  | 1.692 | map1a                     |               |
| DMRNW_015096068.1:92301  | NW_015096068.1 | 92301  | 94600  | 2300 | 1  | 1.62E-08 | 57  | 2.478 | LOC106932919              |               |
| DMRNW_015096082.1:10701  | NW_015096082.1 | 10701  | 15100  | 4400 | 1  | 6.58E-09 | 98  | 2.227 |                           |               |
| DMRNW_015096082.1:73101  | NW_015096082.1 | 73101  | 75000  | 1900 | 2  | 6.25E-14 | 53  | 2.789 | fgfbp3                    | Unknown       |
| DMRNW_015096086.1:76901  | NW_015096086.1 | 76901  | 77900  | 1000 | 1  | 8.42E-08 | 22  | 2.2   | smarca2                   | Transcription |
| DMRNW_015096091.1:115601 | NW_015096091.1 | 115601 | 118800 | 3200 | 1  | 3.56E-08 | 58  | 1.812 | LOC106933078              |               |
| DMRNW_015096093.1:158701 | NW_015096093.1 | 158701 | 159000 | 300  | 1  | 1.40E-08 | 9   | 3     |                           |               |
| DMRNW_015096099.1:140601 | NW_015096099.1 | 140601 | 142500 | 1900 | 1  | 1.93E-09 | 42  | 2.211 | LOC106933160              |               |
| DMRNW_015096103.1:101301 | NW_015096103.1 | 101301 | 104700 | 3400 | 3  | 1.59E-10 | 95  | 2.794 | LOC106933189              |               |
| DMRNW_015096104.1:222201 | NW_015096104.1 | 222201 | 222700 | 500  | 1  | 5.67E-08 | 13  | 2.6   | ncor1                     | Transcription |
| DMRNW_015096107.1:224501 | NW_015096107.1 | 224501 | 225500 | 1000 | 1  | 4.32E-08 | 20  | 2     | LOC106933239              |               |
| DMRNW_015096110.1:9101   | NW_015096110.1 | 9101   | 14700  | 5600 | 2  | 2.41E-11 | 131 | 2.339 |                           |               |
| DMRNW_015096115.1:108901 | NW_015096115.1 | 108901 | 109300 | 400  | 1  | 1.77E-08 | 15  | 3.75  | dusp28                    | Signaling     |
| DMRNW_015096119.1:92601  | NW_015096119.1 | 92601  | 93100  | 500  | 1  | 2.46E-08 | 9   | 1.8   |                           |               |
| DMRNW_015096132.1:137801 | NW_015096132.1 | 137801 | 138700 | 900  | 2  | 1.16E-14 | 24  | 2.667 | LOC106933404;LOC106933410 |               |
| DMRNW_015096141.1:143701 | NW_015096141.1 | 143701 | 146248 | 2548 | 4  | 4.81E-09 | 55  | 2.159 |                           |               |

|                          |                |        |        |      |   |          |     |       |                            |               |
|--------------------------|----------------|--------|--------|------|---|----------|-----|-------|----------------------------|---------------|
| DMRNW_015096145.1:135001 | NW_015096145.1 | 135001 | 137300 | 2300 | 1 | 2.38E-15 | 41  | 1.783 |                            |               |
| DMRNW_015096147.1:21401  | NW_015096147.1 | 21401  | 25100  | 3700 | 2 | 6.80E-10 | 108 | 2.919 | LOC106933487               |               |
| DMRNW_015096147.1:36701  | NW_015096147.1 | 36701  | 42500  | 5800 | 1 | 1.12E-11 | 109 | 1.879 |                            |               |
| DMRNW_015096147.1:96601  | NW_015096147.1 | 96601  | 96800  | 200  | 1 | 3.86E-08 | 5   | 2.5   | LOC106933501               |               |
| DMRNW_015096153.1:76301  | NW_015096153.1 | 76301  | 78200  | 1900 | 1 | 1.03E-10 | 56  | 2.947 | LOC106933541               |               |
| DMRNW_015096156.1:61301  | NW_015096156.1 | 61301  | 61700  | 400  | 3 | 1.11E-12 | 13  | 3.25  | kdm8                       |               |
| DMRNW_015096160.1:79501  | NW_015096160.1 | 79501  | 80200  | 700  | 1 | 8.23E-09 | 9   | 1.286 | chst11                     | Metabolism    |
| DMRNW_015096166.1:197201 | NW_015096166.1 | 197201 | 199500 | 2300 | 1 | 8.20E-08 | 45  | 1.957 | LOC106933618               |               |
| DMRNW_015096170.1:211901 | NW_015096170.1 | 211901 | 215300 | 3400 | 1 | 2.92E-08 | 96  | 2.824 | itpr3                      |               |
| DMRNW_015096170.1:234701 | NW_015096170.1 | 234701 | 235900 | 1200 | 1 | 7.27E-09 | 116 | 9.667 | itpr3                      |               |
| DMRNW_015096177.1:34401  | NW_015096177.1 | 34401  | 37700  | 3300 | 3 | 2.28E-35 | 129 | 3.909 | gmnc                       |               |
| DMRNW_015096177.1:89601  | NW_015096177.1 | 89601  | 90300  | 700  | 1 | 8.59E-17 | 24  | 3.429 | lgals12                    | Signaling     |
| DMRNW_015096177.1:139901 | NW_015096177.1 | 139901 | 141300 | 1400 | 5 | 2.50E-10 | 20  | 1.429 | LOC106933689               |               |
| DMRNW_015096188.1:67801  | NW_015096188.1 | 67801  | 69500  | 1700 | 1 | 1.53E-08 | 29  | 1.706 | tmem117                    | Unknown       |
| DMRNW_015096189.1:41701  | NW_015096189.1 | 41701  | 42800  | 1100 | 1 | 7.98E-09 | 56  | 5.091 | gabaprapl2                 | Cytoskeleton  |
| DMRNW_015096196.1:94001  | NW_015096196.1 | 94001  | 94700  | 700  | 2 | 1.28E-08 | 54  | 7.714 | mycl                       |               |
| DMRNW_015096196.1:136901 | NW_015096196.1 | 136901 | 139200 | 2300 | 1 | 1.43E-10 | 89  | 3.87  |                            |               |
| DMRNW_015096200.1:16601  | NW_015096200.1 | 16601  | 16900  | 300  | 1 | 7.08E-08 | 16  | 5.333 |                            |               |
| DMRNW_015096201.1:41301  | NW_015096201.1 | 41301  | 42800  | 1500 | 1 | 5.05E-09 | 17  | 1.133 | anapc1                     | Cell Cycle    |
| DMRNW_015096204.1:32301  | NW_015096204.1 | 32301  | 34600  | 2300 | 3 | 8.56E-11 | 68  | 2.957 |                            |               |
| DMRNW_015096205.1:42801  | NW_015096205.1 | 42801  | 47400  | 4600 | 3 | 7.34E-33 | 111 | 2.413 | cdh20                      | Cytoskeleton  |
| DMRNW_015096208.1:105001 | NW_015096208.1 | 105001 | 105600 | 600  | 1 | 2.91E-09 | 23  | 3.833 | inadl                      | Cytoskeleton  |
| DMRNW_015096208.1:125001 | NW_015096208.1 | 125001 | 125600 | 600  | 1 | 2.78E-12 | 42  | 7     | inadl;LOC106933912         | Cytoskeleton  |
| DMRNW_015096209.1:102901 | NW_015096209.1 | 102901 | 103700 | 800  | 1 | 4.85E-10 | 21  | 2.625 |                            |               |
| DMRNW_015096210.1:117201 | NW_015096210.1 | 117201 | 118800 | 1600 | 2 | 5.96E-13 | 20  | 1.25  |                            |               |
| DMRNW_015096215.1:16101  | NW_015096215.1 | 16101  | 17200  | 1100 | 2 | 8.73E-12 | 38  | 3.455 |                            |               |
| DMRNW_015096222.1:92901  | NW_015096222.1 | 92901  | 95800  | 2900 | 4 | 2.29E-20 | 68  | 2.345 |                            |               |
| DMRNW_015096222.1:105801 | NW_015096222.1 | 105801 | 108700 | 2900 | 1 | 5.45E-10 | 141 | 4.862 |                            |               |
| DMRNW_015096225.1:96501  | NW_015096225.1 | 96501  | 97600  | 1100 | 2 | 2.64E-10 | 19  | 1.727 |                            |               |
| DMRNW_015096227.1:13201  | NW_015096227.1 | 13201  | 20000  | 6800 | 1 | 2.43E-08 | 155 | 2.279 | LOC106934016               |               |
| DMRNW_015096228.1:401    | NW_015096228.1 | 401    | 1000   | 600  | 1 | 2.73E-09 | 16  | 2.667 |                            |               |
| DMRNW_015096228.1:41901  | NW_015096228.1 | 41901  | 42800  | 900  | 1 | 5.43E-10 | 32  | 3.556 |                            |               |
| DMRNW_015096230.1:1      | NW_015096230.1 | 1      | 1700   | 1700 | 1 | 6.81E-08 | 47  | 2.765 | LOC106934048               |               |
| DMRNW_015096230.1:23301  | NW_015096230.1 | 23301  | 23500  | 200  | 1 | 2.14E-12 | 0   | 0     | LOC106934046               |               |
| DMRNW_015096230.1:120001 | NW_015096230.1 | 120001 | 121000 | 1000 | 2 | 8.77E-32 | 48  | 4.8   | LOC106934044               |               |
| DMRNW_015096231.1:108201 | NW_015096231.1 | 108201 | 109600 | 1400 | 1 | 7.78E-13 | 41  | 2.929 | LOC106934054               |               |
| DMRNW_015096240.1:96101  | NW_015096240.1 | 96101  | 98100  | 2000 | 1 | 1.94E-09 | 84  | 4.2   | tmem11                     |               |
| DMRNW_015096247.1:3201   | NW_015096247.1 | 3201   | 6300   | 3100 | 1 | 1.09E-08 | 70  | 2.258 |                            |               |
| DMRNW_015096257.1:91601  | NW_015096257.1 | 91601  | 96800  | 5200 | 1 | 1.96E-08 | 216 | 4.154 | dzank1;polr3f;LOC106934240 | Transcription |
| DMRNW_015096258.1:17101  | NW_015096258.1 | 17101  | 17400  | 300  | 1 | 8.71E-08 | 7   | 2.333 | usp11                      | Protease      |
| DMRNW_015096258.1:133901 | NW_015096258.1 | 133901 | 134862 | 962  | 3 | 1.59E-37 | 23  | 2.391 |                            |               |
| DMRNW_015096259.1:104401 | NW_015096259.1 | 104401 | 106800 | 2400 | 2 | 9.42E-12 | 70  | 2.917 |                            |               |
| DMRNW_015096263.1:14101  | NW_015096263.1 | 14101  | 14700  | 600  | 1 | 8.15E-08 | 24  | 4     | LOC106934294               |               |
| DMRNW_015096263.1:201401 | NW_015096263.1 | 201401 | 203100 | 1700 | 1 | 1.07E-08 | 43  | 2.529 |                            |               |
| DMRNW_015096263.1:215701 | NW_015096263.1 | 215701 | 216600 | 900  | 2 | 4.77E-14 | 15  | 1.667 |                            |               |
| DMRNW_015096264.1:85301  | NW_015096264.1 | 85301  | 86000  | 700  | 1 | 2.48E-08 | 28  | 4     | LOC106934317               |               |
| DMRNW_015096264.1:130501 | NW_015096264.1 | 130501 | 131500 | 1000 | 2 | 4.08E-12 | 29  | 2.9   |                            |               |
| DMRNW_015096270.1:132401 | NW_015096270.1 | 132401 | 133900 | 1500 | 2 | 3.84E-12 | 60  | 4     | LOC106934357               |               |
| DMRNW_015096281.1:128801 | NW_015096281.1 | 128801 | 129100 | 300  | 1 | 4.93E-08 | 6   | 2     |                            |               |
| DMRNW_015096284.1:70301  | NW_015096284.1 | 70301  | 72600  | 2300 | 7 | 3.38E-34 | 43  | 1.87  |                            |               |
| DMRNW_015096288.1:20201  | NW_015096288.1 | 20201  | 20900  | 700  | 2 | 4.80E-14 | 23  | 3.286 |                            |               |
| DMRNW_015096291.1:82801  | NW_015096291.1 | 82801  | 83500  | 700  | 1 | 2.06E-10 | 39  | 5.571 | elk3                       | Transcription |
| DMRNW_015096293.1:230901 | NW_015096293.1 | 230901 | 231912 | 1012 | 8 | 6.56E-11 | 58  | 5.731 |                            |               |
| DMRNW_015096295.1:118501 | NW_015096295.1 | 118501 | 122600 | 4100 | 3 | 4.01E-13 | 237 | 5.78  | med16;LOC106903341         | Transcription |
| DMRNW_015096309.1:81401  | NW_015096309.1 | 81401  | 82100  | 700  | 1 | 2.63E-09 | 9   | 1.286 | LOC106903427               |               |
| DMRNW_015096317.1:93501  | NW_015096317.1 | 93501  | 100100 | 6600 | 2 | 8.40E-10 | 81  | 1.227 | LOC106903459;LOC106903461  |               |
| DMRNW_015096324.1:77901  | NW_015096324.1 | 77901  | 78600  | 700  | 1 | 7.63E-09 | 9   | 1.286 |                            |               |
| DMRNW_015096330.1:47101  | NW_015096330.1 | 47101  | 51300  | 4200 | 1 | 1.91E-14 | 95  | 2.262 | sema4c;LOC106903536        | Signaling     |
| DMRNW_015096335.1:95301  | NW_015096335.1 | 95301  | 96400  | 1100 | 1 | 9.43E-10 | 37  | 3.364 | rhbd1                      | Protease      |
| DMRNW_015096340.1:70501  | NW_015096340.1 | 70501  | 72300  | 1800 | 1 | 2.69E-08 | 62  | 3.444 | LOC106903633               |               |
| DMRNW_015096340.1:89801  | NW_015096340.1 | 89801  | 93700  | 3900 | 1 | 5.16E-09 | 139 | 3.564 | LOC106903633               |               |
| DMRNW_015096343.1:3901   | NW_015096343.1 | 3901   | 4800   | 900  | 2 | 4.44E-13 | 35  | 3.889 | LOC106903666               |               |
| DMRNW_015096352.1:41901  | NW_015096352.1 | 41901  | 43900  | 2000 | 1 | 2.07E-09 | 33  | 1.65  |                            |               |
| DMRNW_015096357.1:151601 | NW_015096357.1 | 151601 | 152400 | 800  | 1 | 2.25E-08 | 58  | 7.25  | LOC106903761               |               |
| DMRNW_015096358.1:119601 | NW_015096358.1 | 119601 | 120000 | 400  | 1 | 3.53E-08 | 10  | 2.5   | LOC106903768               |               |
| DMRNW_015096361.1:14101  | NW_015096361.1 | 14101  | 15800  | 1700 | 1 | 7.79E-11 | 17  | 1     |                            |               |
| DMRNW_015096363.1:40101  | NW_015096363.1 | 40101  | 41000  | 900  | 1 | 3.14E-10 | 65  | 7.222 | LOC106903800               |               |
| DMRNW_015096371.1:6001   | NW_015096371.1 | 6001   | 8600   | 2600 | 1 | 9.29E-16 | 110 | 4.231 | ninl                       | Cytoskeleton  |
| DMRNW_015096371.1:59901  | NW_015096371.1 | 59901  | 60500  | 600  | 1 | 6.05E-09 | 5   | 0.833 | LOC106903847               |               |
| DMRNW_015096375.1:53701  | NW_015096375.1 | 53701  | 54000  | 300  | 1 | 5.60E-08 | 8   | 2.667 | nek10                      | Signaling     |
| DMRNW_015096378.1:110301 | NW_015096378.1 | 110301 | 110700 | 400  | 1 | 1.06E-08 | 4   | 1     | csrnp3;LOC106903878        | Unknown       |
| DMRNW_015096382.1:41601  | NW_015096382.1 | 41601  | 42900  | 1300 | 3 | 6.59E-11 | 40  | 3.077 |                            |               |
| DMRNW_015096384.1:2101   | NW_015096384.1 | 2101   | 3000   | 900  | 1 | 5.86E-08 | 21  | 2.333 |                            |               |
| DMRNW_015096387.1:49401  | NW_015096387.1 | 49401  | 51800  | 2400 | 3 | 3.31E-25 | 102 | 4.25  | LOC106903954               |               |



|                          |                |        |        |      |   |          |     |       |                           |                       |
|--------------------------|----------------|--------|--------|------|---|----------|-----|-------|---------------------------|-----------------------|
| DMRNW_015096387.1:77901  | NW_015096387.1 | 77901  | 78800  | 900  | 2 | 7.51E-10 | 41  | 4.556 | LOC106903954;LOC106903952 |                       |
| DMRNW_015096393.1:12701  | NW_015096393.1 | 12701  | 12900  | 200  | 1 | 2.32E-08 | 7   | 3.5   | vta1                      |                       |
| DMRNW_015096399.1:41901  | NW_015096399.1 | 41901  | 43400  | 1500 | 1 | 1.56E-08 | 28  | 1.867 | LOC106904022              |                       |
| DMRNW_015096405.1:157001 | NW_015096405.1 | 157001 | 157600 | 600  | 1 | 1.06E-10 | 19  | 3.167 |                           |                       |
| DMRNW_015096406.1:28501  | NW_015096406.1 | 28501  | 32400  | 3900 | 1 | 2.53E-09 | 168 | 4.308 | LOC106904068              |                       |
| DMRNW_015096420.1:23101  | NW_015096420.1 | 23101  | 23800  | 700  | 1 | 1.58E-09 | 44  | 6.286 | fibp;fosl1                | Unknown;Transcription |
| DMRNW_015096420.1:110201 | NW_015096420.1 | 110201 | 112400 | 2200 | 1 | 2.83E-08 | 112 | 5.091 | LOC106904176;LOC106904175 |                       |
| DMRNW_015096424.1:61001  | NW_015096424.1 | 61001  | 63400  | 2400 | 1 | 7.41E-08 | 47  | 1.958 |                           |                       |
| DMRNW_015096428.1:65101  | NW_015096428.1 | 65101  | 66100  | 1000 | 1 | 4.00E-08 | 26  | 2.6   | LOC106904219;LOC106904222 |                       |
| DMRNW_015096432.1:9101   | NW_015096432.1 | 9101   | 11600  | 2500 | 1 | 2.69E-09 | 111 | 4.44  |                           |                       |
| DMRNW_015096449.1:13701  | NW_015096449.1 | 13701  | 16400  | 2700 | 3 | 1.97E-20 | 72  | 2.667 |                           |                       |
| DMRNW_015096449.1:19801  | NW_015096449.1 | 19801  | 20100  | 300  | 3 | 1.15E-18 | 16  | 5.333 |                           |                       |
| DMRNW_015096450.1:93201  | NW_015096450.1 | 93201  | 94300  | 1100 | 3 | 8.86E-10 | 17  | 1.545 |                           |                       |
| DMRNW_015096452.1:44101  | NW_015096452.1 | 44101  | 44800  | 700  | 1 | 1.59E-08 | 28  | 4     | slc6a9                    | Metabolism            |
| DMRNW_015096469.1:52901  | NW_015096469.1 | 52901  | 53400  | 500  | 4 | 3.60E-25 | 24  | 4.8   | LOC106904435              |                       |
| DMRNW_015096474.1:28801  | NW_015096474.1 | 28801  | 30000  | 1200 | 1 | 6.07E-08 | 29  | 2.417 | LOC106904453              |                       |
| DMRNW_015096475.1:52501  | NW_015096475.1 | 52501  | 55400  | 2900 | 1 | 1.85E-08 | 143 | 4.931 | LOC106904461              |                       |
| DMRNW_015096475.1:112101 | NW_015096475.1 | 112101 | 114600 | 2500 | 7 | 1.55E-22 | 56  | 2.24  | ppm1e                     | Signaling             |
| DMRNW_015096476.1:46301  | NW_015096476.1 | 46301  | 48800  | 2500 | 2 | 3.45E-10 | 52  | 2.08  |                           |                       |
| DMRNW_015096481.1:65901  | NW_015096481.1 | 65901  | 66500  | 600  | 1 | 2.20E-11 | 38  | 6.333 | LOC106904501              |                       |
| DMRNW_015096483.1:47601  | NW_015096483.1 | 47601  | 50100  | 2500 | 1 | 7.81E-11 | 54  | 2.16  |                           |                       |
| DMRNW_015096488.1:46801  | NW_015096488.1 | 46801  | 51000  | 4200 | 4 | 1.89E-25 | 70  | 1.667 | LOC106904533              |                       |
| DMRNW_015096488.1:97101  | NW_015096488.1 | 97101  | 97900  | 800  | 1 | 1.30E-13 | 26  | 3.25  |                           |                       |
| DMRNW_015096489.1:99901  | NW_015096489.1 | 99901  | 100900 | 1000 | 1 | 5.69E-10 | 16  | 1.6   |                           |                       |
| DMRNW_015096493.1:149401 | NW_015096493.1 | 149401 | 151700 | 2300 | 1 | 1.34E-10 | 28  | 1.217 | LOC106904550              |                       |
| DMRNW_015096502.1:9201   | NW_015096502.1 | 9201   | 14900  | 5700 | 1 | 5.36E-09 | 122 | 2.14  |                           |                       |
| DMRNW_015096514.1:109301 | NW_015096514.1 | 109301 | 110800 | 1500 | 2 | 1.59E-15 | 62  | 4.133 | LOC106904686              |                       |
| DMRNW_015096517.1:11801  | NW_015096517.1 | 11801  | 14800  | 3000 | 1 | 1.57E-09 | 102 | 3.4   | dlx3                      | Transcription         |
| DMRNW_015096520.1:11301  | NW_015096520.1 | 11301  | 12100  | 800  | 1 | 1.59E-08 | 18  | 2.25  |                           |                       |
| DMRNW_015096520.1:64501  | NW_015096520.1 | 64501  | 65800  | 1300 | 1 | 3.01E-08 | 37  | 2.846 | LOC106904726              |                       |
| DMRNW_015096533.1:8901   | NW_015096533.1 | 8901   | 10200  | 1300 | 1 | 2.87E-09 | 52  | 4     | rpl30                     | Transcription         |
| DMRNW_015096533.1:66701  | NW_015096533.1 | 66701  | 68800  | 2100 | 1 | 1.83E-08 | 91  | 4.333 | rnf19a                    |                       |
| DMRNW_015096534.1:36601  | NW_015096534.1 | 36601  | 36900  | 300  | 1 | 8.07E-09 | 3   | 1     |                           |                       |
| DMRNW_015096538.1:17101  | NW_015096538.1 | 17101  | 18300  | 1200 | 1 | 4.71E-08 | 24  | 2     | LOC106904828              |                       |
| DMRNW_015096540.1:16201  | NW_015096540.1 | 16201  | 17900  | 1700 | 3 | 5.72E-09 | 64  | 3.765 | LOC106904835              |                       |
| DMRNW_015096544.1:57701  | NW_015096544.1 | 57701  | 59900  | 2200 | 1 | 7.27E-11 | 57  | 2.591 |                           |                       |
| DMRNW_015096551.1:1401   | NW_015096551.1 | 1401   | 4600   | 3200 | 1 | 1.84E-09 | 92  | 2.875 |                           |                       |
| DMRNW_015096562.1:9301   | NW_015096562.1 | 9301   | 10300  | 1000 | 1 | 1.86E-15 | 53  | 5.3   | LOC106904965              |                       |
| DMRNW_015096568.1:76301  | NW_015096568.1 | 76301  | 77300  | 1000 | 1 | 7.52E-10 | 4   | 0.4   |                           |                       |
| DMRNW_015096578.1:37201  | NW_015096578.1 | 37201  | 38200  | 1000 | 1 | 4.88E-13 | 10  | 1     | LOC106905042              |                       |
| DMRNW_015096584.1:35001  | NW_015096584.1 | 35001  | 35800  | 800  | 1 | 4.31E-08 | 17  | 2.125 |                           |                       |
| DMRNW_015096586.1:33401  | NW_015096586.1 | 33401  | 34000  | 600  | 1 | 2.22E-08 | 32  | 5.333 | LOC106905099;LOC106905101 |                       |
| DMRNW_015096590.1:7201   | NW_015096590.1 | 7201   | 7600   | 400  | 2 | 1.08E-24 | 10  | 2.5   | eya2                      | Development           |
| DMRNW_015096592.1:42901  | NW_015096592.1 | 42901  | 44000  | 1100 | 1 | 1.56E-09 | 29  | 2.636 |                           |                       |
| DMRNW_015096595.1:57601  | NW_015096595.1 | 57601  | 58800  | 1200 | 1 | 9.68E-08 | 20  | 1.667 | LOC106905153              |                       |
| DMRNW_015096596.1:106501 | NW_015096596.1 | 106501 | 107700 | 1200 | 1 | 3.62E-09 | 25  | 2.083 |                           |                       |
| DMRNW_015096601.1:58101  | NW_015096601.1 | 58101  | 59300  | 1200 | 1 | 6.45E-10 | 28  | 2.333 | LOC106905180              |                       |
| DMRNW_015096605.1:7201   | NW_015096605.1 | 7201   | 9400   | 2200 | 1 | 5.71E-11 | 41  | 1.864 |                           |                       |
| DMRNW_015096605.1:14301  | NW_015096605.1 | 14301  | 19900  | 5600 | 2 | 1.87E-09 | 118 | 2.107 | LOC106905197              |                       |
| DMRNW_015096617.1:31501  | NW_015096617.1 | 31501  | 34900  | 3400 | 2 | 5.20E-10 | 62  | 1.824 | LOC106905274              |                       |
| DMRNW_015096621.1:24001  | NW_015096621.1 | 24001  | 24200  | 200  | 1 | 1.88E-09 | 5   | 2.5   | LOC106905292              |                       |
| DMRNW_015096621.1:49201  | NW_015096621.1 | 49201  | 50600  | 1400 | 3 | 8.80E-13 | 114 | 8.143 | herc1                     | Signaling             |
| DMRNW_015096621.1:85601  | NW_015096621.1 | 85601  | 85900  | 300  | 1 | 9.35E-12 | 6   | 2     | herc1                     | Signaling             |
| DMRNW_015096621.1:90901  | NW_015096621.1 | 90901  | 93400  | 2500 | 2 | 1.23E-11 | 85  | 3.4   | herc1                     | Signaling             |
| DMRNW_015096621.1:109801 | NW_015096621.1 | 109801 | 110200 | 400  | 3 | 4.92E-15 | 0   | 0     | herc1                     | Signaling             |
| DMRNW_015096628.1:60101  | NW_015096628.1 | 60101  | 60600  | 500  | 2 | 9.19E-10 | 22  | 4.4   | LOC106905319              |                       |
| DMRNW_015096629.1:64201  | NW_015096629.1 | 64201  | 65400  | 1200 | 1 | 1.34E-10 | 25  | 2.083 | LOC106905325              |                       |
| DMRNW_015096629.1:77501  | NW_015096629.1 | 77501  | 79800  | 2300 | 1 | 1.29E-08 | 51  | 2.217 | LOC106905322;LOC106905327 |                       |
| DMRNW_015096632.1:79901  | NW_015096632.1 | 79901  | 81300  | 1400 | 1 | 5.88E-09 | 14  | 1     | LOC106905344              |                       |
| DMRNW_015096634.1:82001  | NW_015096634.1 | 82001  | 83700  | 1700 | 2 | 1.91E-10 | 49  | 2.882 | LOC106905363              |                       |
| DMRNW_015096638.1:101701 | NW_015096638.1 | 101701 | 102000 | 300  | 1 | 2.03E-08 | 10  | 3.333 |                           |                       |
| DMRNW_015096648.1:39001  | NW_015096648.1 | 39001  | 39900  | 900  | 1 | 8.87E-11 | 34  | 3.778 |                           |                       |
| DMRNW_015096648.1:116301 | NW_015096648.1 | 116301 | 117100 | 800  | 1 | 9.63E-08 | 47  | 5.875 |                           |                       |
| DMRNW_015096653.1:112201 | NW_015096653.1 | 112201 | 114800 | 2600 | 4 | 2.26E-42 | 126 | 4.846 | LOC106905447              |                       |
| DMRNW_015096653.1:127501 | NW_015096653.1 | 127501 | 128500 | 1000 | 1 | 2.97E-11 | 27  | 2.7   |                           |                       |
| DMRNW_015096653.1:155901 | NW_015096653.1 | 155901 | 157300 | 1400 | 1 | 4.86E-08 | 48  | 3.429 | LOC106905454              |                       |
| DMRNW_015096654.1:501    | NW_015096654.1 | 501    | 1000   | 500  | 1 | 5.18E-08 | 27  | 5.4   | LOC106905460              |                       |
| DMRNW_015096654.1:73101  | NW_015096654.1 | 73101  | 73500  | 400  | 2 | 9.49E-12 | 10  | 2.5   | sap30bp                   | Transcription         |
| DMRNW_015096655.1:301    | NW_015096655.1 | 301    | 2300   | 2000 | 3 | 8.18E-12 | 48  | 2.4   |                           |                       |
| DMRNW_015096655.1:27401  | NW_015096655.1 | 27401  | 27600  | 200  | 1 | 4.64E-08 | 3   | 1.5   |                           |                       |
| DMRNW_015096655.1:55101  | NW_015096655.1 | 55101  | 56800  | 1700 | 1 | 2.71E-08 | 72  | 4.235 | LOC106905470              |                       |
| DMRNW_015096655.1:78501  | NW_015096655.1 | 78501  | 79700  | 1200 | 1 | 4.11E-10 | 16  | 1.333 | LOC106905470              |                       |
| DMRNW_015096659.1:36301  | NW_015096659.1 | 36301  | 36600  | 300  | 1 | 2.05E-09 | 13  | 4.333 | LOC106905491              |                       |
| DMRNW_015096665.1:65401  | NW_015096665.1 | 65401  | 67100  | 1700 | 1 | 1.09E-08 | 48  | 2.824 |                           |                       |

|                          |                |        |        |       |    |          |     |       |                               |               |
|--------------------------|----------------|--------|--------|-------|----|----------|-----|-------|-------------------------------|---------------|
| DMRNW_015096666.1:87501  | NW_015096666.1 | 87501  | 89000  | 1500  | 2  | 4.48E-20 | 33  | 2.2   |                               |               |
| DMRNW_015096666.1:92901  | NW_015096666.1 | 92901  | 98700  | 5800  | 5  | 9.72E-13 | 96  | 1.655 |                               |               |
| DMRNW_015096666.1:111201 | NW_015096666.1 | 111201 | 111800 | 600   | 2  | 1.54E-13 | 12  | 2     |                               |               |
| DMRNW_015096666.1:118201 | NW_015096666.1 | 118201 | 119000 | 800   | 1  | 3.64E-09 | 74  | 9.25  | orc1                          |               |
| DMRNW_015096666.1:133401 | NW_015096666.1 | 133401 | 136200 | 2800  | 5  | 5.92E-12 | 85  | 3.036 | LOC106905533                  |               |
| DMRNW_015096681.1:6301   | NW_015096681.1 | 6301   | 6700   | 400   | 1  | 7.44E-08 | 12  | 3     | ubr7                          |               |
| DMRNW_015096681.1:11301  | NW_015096681.1 | 11301  | 14600  | 3300  | 1  | 1.19E-08 | 89  | 2.697 | ubr7;LOC106905639;LOC10690563 |               |
| DMRNW_015096681.1:39501  | NW_015096681.1 | 39501  | 39800  | 300   | 2  | 3.07E-09 | 1   | 0.333 | ppp4r4                        |               |
| DMRNW_015096685.1:52201  | NW_015096685.1 | 52201  | 54900  | 2700  | 1  | 5.05E-08 | 52  | 1.926 |                               |               |
| DMRNW_015096690.1:53101  | NW_015096690.1 | 53101  | 55000  | 1900  | 1  | 4.00E-10 | 40  | 2.105 | LOC106905665                  |               |
| DMRNW_015096712.1:48701  | NW_015096712.1 | 48701  | 49700  | 1000  | 1  | 9.92E-08 | 30  | 3     |                               |               |
| DMRNW_015096718.1:47401  | NW_015096718.1 | 47401  | 48200  | 800   | 1  | 6.55E-10 | 30  | 3.75  | LOC106905787                  |               |
| DMRNW_015096722.1:54801  | NW_015096722.1 | 54801  | 57600  | 2800  | 1  | 4.01E-10 | 54  | 1.929 |                               |               |
| DMRNW_015096722.1:61901  | NW_015096722.1 | 61901  | 63200  | 1300  | 1  | 8.60E-10 | 28  | 2.154 |                               |               |
| DMRNW_015096724.1:93901  | NW_015096724.1 | 93901  | 95400  | 1500  | 1  | 7.62E-11 | 71  | 4.733 | hpgd                          | Metabolism    |
| DMRNW_015096730.1:81101  | NW_015096730.1 | 81101  | 82200  | 1100  | 2  | 1.63E-31 | 20  | 1.818 |                               |               |
| DMRNW_015096734.1:100401 | NW_015096734.1 | 100401 | 100600 | 200   | 1  | 2.84E-09 | 6   | 3     |                               |               |
| DMRNW_015096749.1:34201  | NW_015096749.1 | 34201  | 34800  | 600   | 1  | 6.93E-10 | 0   | 0     |                               |               |
| DMRNW_015096755.1:76001  | NW_015096755.1 | 76001  | 76700  | 700   | 2  | 1.41E-17 | 31  | 4.429 |                               |               |
| DMRNW_015096755.1:98001  | NW_015096755.1 | 98001  | 98834  | 834   | 1  | 1.75E-11 | 15  | 1.799 |                               |               |
| DMRNW_015096757.1:101    | NW_015096757.1 | 101    | 1300   | 1200  | 4  | 1.32E-16 | 69  | 5.75  |                               |               |
| DMRNW_015096757.1:43801  | NW_015096757.1 | 43801  | 45300  | 1500  | 1  | 3.03E-08 | 31  | 2.067 | LOC106905935                  |               |
| DMRNW_015096760.1:44401  | NW_015096760.1 | 44401  | 45700  | 1300  | 1  | 1.41E-10 | 27  | 2.077 | LOC106905949                  |               |
| DMRNW_015096760.1:82701  | NW_015096760.1 | 82701  | 89700  | 7000  | 1  | 4.14E-09 | 117 | 1.671 | LOC106905949                  |               |
| DMRNW_015096766.1:14801  | NW_015096766.1 | 14801  | 18400  | 3600  | 1  | 6.45E-09 | 46  | 1.278 | LOC106905969                  |               |
| DMRNW_015096767.1:83601  | NW_015096767.1 | 83601  | 85700  | 2100  | 1  | 2.22E-08 | 63  | 3     | LOC106905975                  |               |
| DMRNW_015096770.1:15901  | NW_015096770.1 | 15901  | 17300  | 1400  | 1  | 3.96E-08 | 78  | 5.571 |                               |               |
| DMRNW_015096770.1:22801  | NW_015096770.1 | 22801  | 23600  | 800   | 4  | 1.11E-12 | 42  | 5.25  | LOC106905992                  |               |
| DMRNW_015096775.1:201    | NW_015096775.1 | 201    | 800    | 600   | 1  | 3.20E-08 | 12  | 2     |                               |               |
| DMRNW_015096775.1:4701   | NW_015096775.1 | 4701   | 6100   | 1400  | 1  | 7.74E-09 | 26  | 1.857 |                               |               |
| DMRNW_015096777.1:57701  | NW_015096777.1 | 57701  | 59500  | 1800  | 2  | 2.66E-09 | 46  | 2.556 | fam69c                        | Unknown       |
| DMRNW_015096777.1:66801  | NW_015096777.1 | 66801  | 67300  | 500   | 2  | 4.23E-16 | 64  | 12.8  | fam69c                        | Unknown       |
| DMRNW_015096778.1:79301  | NW_015096778.1 | 79301  | 83700  | 4400  | 1  | 2.29E-08 | 99  | 2.25  | LOC106906037                  |               |
| DMRNW_015096786.1:14001  | NW_015096786.1 | 14001  | 14400  | 400   | 1  | 2.76E-08 | 2   | 0.5   | LOC106906083                  |               |
| DMRNW_015096791.1:7401   | NW_015096791.1 | 7401   | 8000   | 600   | 1  | 2.78E-08 | 24  | 4     | LOC106906111                  |               |
| DMRNW_015096791.1:80501  | NW_015096791.1 | 80501  | 81500  | 1000  | 1  | 6.41E-08 | 54  | 5.4   | LOC106906107                  |               |
| DMRNW_015096792.1:82101  | NW_015096792.1 | 82101  | 84500  | 2400  | 1  | 7.68E-08 | 31  | 1.292 |                               |               |
| DMRNW_015096810.1:43201  | NW_015096810.1 | 43201  | 45700  | 2500  | 2  | 7.59E-16 | 31  | 1.24  |                               |               |
| DMRNW_015096815.1:65801  | NW_015096815.1 | 65801  | 68300  | 2500  | 1  | 3.63E-08 | 91  | 3.64  | LOC106906217                  |               |
| DMRNW_015096820.1:105001 | NW_015096820.1 | 105001 | 105300 | 300   | 1  | 8.40E-09 | 3   | 1     |                               |               |
| DMRNW_015096824.1:46201  | NW_015096824.1 | 46201  | 48200  | 2000  | 2  | 1.92E-09 | 89  | 4.45  | cpped1                        | Signaling     |
| DMRNW_015096828.1:1      | NW_015096828.1 | 1      | 600    | 600   | 2  | 3.24E-08 | 5   | 0.833 |                               |               |
| DMRNW_015096841.1:36401  | NW_015096841.1 | 36401  | 38900  | 2500  | 1  | 7.24E-10 | 83  | 3.32  |                               |               |
| DMRNW_015096856.1:18401  | NW_015096856.1 | 18401  | 19700  | 1300  | 4  | 3.73E-20 | 60  | 4.615 | pcsk9                         | Protease      |
| DMRNW_015096868.1:33701  | NW_015096868.1 | 33701  | 35600  | 1900  | 2  | 2.34E-24 | 53  | 2.789 |                               |               |
| DMRNW_015096895.1:13601  | NW_015096895.1 | 13601  | 15100  | 1500  | 2  | 7.86E-11 | 47  | 3.133 |                               |               |
| DMRNW_015096896.1:86001  | NW_015096896.1 | 86001  | 91200  | 5200  | 12 | 3.55E-22 | 188 | 3.615 |                               |               |
| DMRNW_015096897.1:21201  | NW_015096897.1 | 21201  | 22300  | 1100  | 1  | 4.99E-09 | 88  | 8     |                               |               |
| DMRNW_015096900.1:50801  | NW_015096900.1 | 50801  | 52700  | 1900  | 3  | 8.89E-11 | 27  | 1.421 | LOC106906593                  |               |
| DMRNW_015096909.1:17301  | NW_015096909.1 | 17301  | 19000  | 1700  | 1  | 8.36E-09 | 42  | 2.471 | ppp6r3                        |               |
| DMRNW_015096911.1:53001  | NW_015096911.1 | 53001  | 53300  | 300   | 1  | 1.13E-08 | 12  | 4     |                               |               |
| DMRNW_015096913.1:27901  | NW_015096913.1 | 27901  | 28700  | 800   | 5  | 2.61E-13 | 27  | 3.375 |                               |               |
| DMRNW_015096914.1:24101  | NW_015096914.1 | 24101  | 27000  | 2900  | 1  | 6.65E-08 | 88  | 3.034 | LOC106906650;LOC106906651     |               |
| DMRNW_015096916.1:42501  | NW_015096916.1 | 42501  | 44200  | 1700  | 2  | 2.73E-11 | 38  | 2.235 |                               |               |
| DMRNW_015096926.1:34701  | NW_015096926.1 | 34701  | 35600  | 900   | 1  | 3.63E-08 | 25  | 2.778 | LOC106906720                  |               |
| DMRNW_015096929.1:54201  | NW_015096929.1 | 54201  | 54600  | 400   | 1  | 2.01E-08 | 7   | 1.75  | LOC106906731                  |               |
| DMRNW_015096929.1:67201  | NW_015096929.1 | 67201  | 69100  | 1900  | 6  | 3.97E-14 | 43  | 2.263 | LOC106906729                  |               |
| DMRNW_015096929.1:73501  | NW_015096929.1 | 73501  | 82300  | 8800  | 14 | 7.94E-35 | 206 | 2.341 | LOC106906729                  |               |
| DMRNW_015096935.1:42401  | NW_015096935.1 | 42401  | 43800  | 1400  | 1  | 1.10E-08 | 33  | 2.357 | LOC106906767                  |               |
| DMRNW_015096951.1:46001  | NW_015096951.1 | 46001  | 46400  | 400   | 3  | 1.31E-27 | 46  | 11.5  | gtf2a2                        | Transcription |
| DMRNW_015096951.1:49301  | NW_015096951.1 | 49301  | 49600  | 300   | 3  | 1.66E-41 | 33  | 11    | gtf2a2                        | Transcription |
| DMRNW_015096959.1:11401  | NW_015096959.1 | 11401  | 16900  | 5500  | 1  | 6.46E-08 | 206 | 3.745 | LOC106906878                  |               |
| DMRNW_015096959.1:18601  | NW_015096959.1 | 18601  | 22200  | 3600  | 3  | 1.73E-19 | 89  | 2.472 | rmnd5b                        |               |
| DMRNW_015096964.1:1      | NW_015096964.1 | 1      | 600    | 600   | 4  | 2.47E-12 | 21  | 3.5   |                               |               |
| DMRNW_015096964.1:27101  | NW_015096964.1 | 27101  | 28400  | 1300  | 1  | 1.29E-09 | 35  | 2.692 | LOC106906902                  |               |
| DMRNW_015097005.1:108401 | NW_015097005.1 | 108401 | 109400 | 1000  | 1  | 6.72E-08 | 41  | 4.1   | LOC106907076                  |               |
| DMRNW_015097006.1:71701  | NW_015097006.1 | 71701  | 73500  | 1800  | 1  | 1.76E-13 | 20  | 1.111 |                               |               |
| DMRNW_015097007.1:6301   | NW_015097007.1 | 6301   | 7200   | 900   | 2  | 7.52E-09 | 20  | 2.222 |                               |               |
| DMRNW_015097007.1:13001  | NW_015097007.1 | 13001  | 28900  | 15900 | 1  | 4.61E-09 | 179 | 1.126 | LOC106907080                  |               |
| DMRNW_015097009.1:51201  | NW_015097009.1 | 51201  | 52300  | 1100  | 2  | 6.50E-10 | 49  | 4.455 | LOC106907087                  |               |
| DMRNW_015097009.1:72301  | NW_015097009.1 | 72301  | 74100  | 1800  | 1  | 2.32E-10 | 71  | 3.944 | LOC106907087                  |               |
| DMRNW_015097017.1:100601 | NW_015097017.1 | 100601 | 100800 | 200   | 1  | 3.00E-08 | 5   | 2.5   |                               |               |
| DMRNW_015097022.1:46501  | NW_015097022.1 | 46501  | 47900  | 1400  | 1  | 6.66E-08 | 27  | 1.929 | accs3                         | Metabolism    |

|                          |                |        |        |       |    |          |     |       |                           |               |
|--------------------------|----------------|--------|--------|-------|----|----------|-----|-------|---------------------------|---------------|
| DMRNW_015097027.1:38901  | NW_015097027.1 | 38901  | 39300  | 400   | 1  | 5.99E-08 | 15  | 3.75  |                           |               |
| DMRNW_015097027.1:70101  | NW_015097027.1 | 70101  | 72200  | 2100  | 3  | 6.17E-18 | 35  | 1.667 |                           |               |
| DMRNW_015097029.1:13501  | NW_015097029.1 | 13501  | 13700  | 200   | 2  | 3.81E-11 | 9   | 4.5   |                           |               |
| DMRNW_015097029.1:49101  | NW_015097029.1 | 49101  | 51400  | 2300  | 3  | 7.28E-30 | 100 | 4.348 |                           |               |
| DMRNW_015097029.1:71801  | NW_015097029.1 | 71801  | 73100  | 1300  | 3  | 2.11E-15 | 14  | 1.077 |                           |               |
| DMRNW_015097030.1:73201  | NW_015097030.1 | 73201  | 75100  | 1900  | 2  | 2.31E-10 | 62  | 3.263 |                           |               |
| DMRNW_015097037.1:15501  | NW_015097037.1 | 15501  | 16400  | 900   | 3  | 3.57E-28 | 29  | 3.222 |                           |               |
| DMRNW_015097037.1:67201  | NW_015097037.1 | 67201  | 68000  | 800   | 2  | 1.07E-39 | 22  | 2.75  | LOC106907194              |               |
| DMRNW_015097037.1:72401  | NW_015097037.1 | 72401  | 72800  | 400   | 3  | 2.70E-50 | 1   | 0.25  | LOC106907194              |               |
| DMRNW_015097045.1:65801  | NW_015097045.1 | 65801  | 66100  | 300   | 1  | 6.29E-09 | 12  | 4     |                           |               |
| DMRNW_015097054.1:54301  | NW_015097054.1 | 54301  | 54900  | 600   | 2  | 3.44E-13 | 13  | 2.167 |                           |               |
| DMRNW_015097062.1:26901  | NW_015097062.1 | 26901  | 30200  | 3300  | 1  | 1.83E-08 | 69  | 2.091 | LOC106907294              |               |
| DMRNW_015097070.1:40401  | NW_015097070.1 | 40401  | 43200  | 2800  | 4  | 1.49E-32 | 48  | 1.714 |                           |               |
| DMRNW_015097072.1:32701  | NW_015097072.1 | 32701  | 38000  | 5300  | 14 | 3.21E-12 | 239 | 4.509 | LOC106907338              |               |
| DMRNW_015097080.1:52801  | NW_015097080.1 | 52801  | 53200  | 400   | 1  | 4.20E-08 | 20  | 5     | tenm2                     |               |
| DMRNW_015097086.1:701    | NW_015097086.1 | 701    | 900    | 200   | 1  | 8.78E-13 | 12  | 6     |                           |               |
| DMRNW_015097088.1:32801  | NW_015097088.1 | 32801  | 33000  | 200   | 1  | 5.43E-09 | 0   | 0     | phf21b                    |               |
| DMRNW_015097089.1:93901  | NW_015097089.1 | 93901  | 96900  | 3000  | 2  | 3.89E-13 | 130 | 4.333 | LOC106907404              |               |
| DMRNW_015097089.1:133701 | NW_015097089.1 | 133701 | 137600 | 3900  | 1  | 6.64E-09 | 103 | 2.641 | LOC106907411;LOC106907412 |               |
| DMRNW_015097097.1:32101  | NW_015097097.1 | 32101  | 32800  | 700   | 2  | 6.32E-10 | 7   | 1     | rab24                     | Signaling     |
| DMRNW_015097097.1:71001  | NW_015097097.1 | 71001  | 73300  | 2300  | 4  | 5.40E-24 | 68  | 2.957 | nsd1                      |               |
| DMRNW_015097097.1:76201  | NW_015097097.1 | 76201  | 76600  | 400   | 2  | 8.59E-19 | 9   | 2.25  |                           |               |
| DMRNW_015097098.1:101    | NW_015097098.1 | 101    | 1100   | 1000  | 1  | 4.36E-08 | 16  | 1.6   |                           |               |
| DMRNW_015097104.1:1      | NW_015097104.1 | 1      | 500    | 500   | 1  | 4.48E-09 | 12  | 2.4   |                           |               |
| DMRNW_015097104.1:41301  | NW_015097104.1 | 41301  | 44200  | 2900  | 2  | 6.71E-23 | 218 | 7.517 |                           |               |
| DMRNW_015097104.1:46501  | NW_015097104.1 | 46501  | 47300  | 800   | 1  | 1.17E-08 | 77  | 9.625 |                           |               |
| DMRNW_015097158.1:18301  | NW_015097158.1 | 18301  | 18600  | 300   | 1  | 2.39E-09 | 2   | 0.667 |                           |               |
| DMRNW_015097159.1:17801  | NW_015097159.1 | 17801  | 18600  | 800   | 1  | 8.69E-08 | 3   | 0.375 |                           |               |
| DMRNW_015097174.1:48901  | NW_015097174.1 | 48901  | 50500  | 1600  | 2  | 1.57E-13 | 40  | 2.5   | syt4                      | Transport     |
| DMRNW_015097188.1:37801  | NW_015097188.1 | 37801  | 38100  | 300   | 1  | 2.10E-08 | 18  | 6     |                           |               |
| DMRNW_015097199.1:66301  | NW_015097199.1 | 66301  | 67300  | 1000  | 1  | 5.82E-08 | 26  | 2.6   |                           |               |
| DMRNW_015097200.1:5801   | NW_015097200.1 | 5801   | 8500   | 2700  | 1  | 2.28E-08 | 98  | 3.63  |                           |               |
| DMRNW_015097224.1:50301  | NW_015097224.1 | 50301  | 51000  | 700   | 2  | 1.76E-12 | 19  | 2.714 | LOC106908019              |               |
| DMRNW_015097236.1:301    | NW_015097236.1 | 301    | 900    | 600   | 1  | 2.55E-10 | 36  | 6     |                           |               |
| DMRNW_015097248.1:28601  | NW_015097248.1 | 28601  | 28900  | 300   | 1  | 8.69E-08 | 11  | 3.667 | tbx15;LOC106908111        | Transcription |
| DMRNW_015097252.1:31301  | NW_015097252.1 | 31301  | 32700  | 1400  | 1  | 7.69E-08 | 104 | 7.429 | xkr4                      | Unknown       |
| DMRNW_015097254.1:34901  | NW_015097254.1 | 34901  | 37500  | 2600  | 2  | 7.26E-13 | 35  | 1.346 | LOC106908141;LOC106908140 |               |
| DMRNW_015097254.1:41201  | NW_015097254.1 | 41201  | 41500  | 300   | 2  | 3.42E-10 | 7   | 2.333 | LOC106908141;LOC106908140 |               |
| DMRNW_015097256.1:101    | NW_015097256.1 | 101    | 1700   | 1600  | 1  | 7.24E-09 | 46  | 2.875 |                           |               |
| DMRNW_015097260.1:92601  | NW_015097260.1 | 92601  | 93700  | 1100  | 1  | 9.91E-12 | 60  | 5.455 | LOC106908156              |               |
| DMRNW_015097265.1:30601  | NW_015097265.1 | 30601  | 32500  | 1900  | 1  | 7.44E-08 | 32  | 1.684 |                           |               |
| DMRNW_015097271.1:71001  | NW_015097271.1 | 71001  | 71700  | 700   | 1  | 6.95E-14 | 23  | 3.286 | nub1                      |               |
| DMRNW_015097271.1:72701  | NW_015097271.1 | 72701  | 75500  | 2800  | 2  | 1.26E-17 | 85  | 3.036 | nub1                      |               |
| DMRNW_015097282.1:24001  | NW_015097282.1 | 24001  | 24900  | 900   | 1  | 1.37E-09 | 41  | 4.556 | LOC106908229              |               |
| DMRNW_015097293.1:27101  | NW_015097293.1 | 27101  | 27600  | 500   | 3  | 1.39E-13 | 27  | 5.4   | LOC106908265              |               |
| DMRNW_015097293.1:34501  | NW_015097293.1 | 34501  | 34800  | 300   | 1  | 1.97E-10 | 4   | 1.333 | LOC106908265              |               |
| DMRNW_015097293.1:55801  | NW_015097293.1 | 55801  | 56300  | 500   | 1  | 3.90E-08 | 17  | 3.4   | LOC106908266              |               |
| DMRNW_015097293.1:60501  | NW_015097293.1 | 60501  | 62200  | 1700  | 2  | 1.38E-14 | 42  | 2.471 | LOC106908266              |               |
| DMRNW_015097302.1:53601  | NW_015097302.1 | 53601  | 56200  | 2600  | 1  | 2.84E-08 | 73  | 2.808 | LOC106908289              |               |
| DMRNW_015097303.1:401    | NW_015097303.1 | 401    | 1000   | 600   | 2  | 9.37E-17 | 20  | 3.333 |                           |               |
| DMRNW_015097305.1:4001   | NW_015097305.1 | 4001   | 5300   | 1300  | 2  | 7.70E-12 | 20  | 1.538 | LOC106908295              |               |
| DMRNW_015097309.1:31001  | NW_015097309.1 | 31001  | 31700  | 700   | 3  | 1.79E-13 | 9   | 1.286 |                           |               |
| DMRNW_015097309.1:34901  | NW_015097309.1 | 34901  | 41500  | 6600  | 24 | 1.80E-12 | 189 | 2.864 |                           |               |
| DMRNW_015097309.1:44801  | NW_015097309.1 | 44801  | 49700  | 4900  | 5  | 2.59E-09 | 115 | 2.347 | LOC106908309              |               |
| DMRNW_015097309.1:54101  | NW_015097309.1 | 54101  | 67600  | 13500 | 14 | 5.75E-19 | 357 | 2.644 |                           |               |
| DMRNW_015097309.1:74801  | NW_015097309.1 | 74801  | 75200  | 400   | 3  | 5.28E-15 | 19  | 4.75  |                           |               |
| DMRNW_015097310.1:27701  | NW_015097310.1 | 27701  | 30800  | 3100  | 2  | 2.36E-08 | 100 | 3.226 | LOC106908316              |               |
| DMRNW_015097321.1:2301   | NW_015097321.1 | 2301   | 3400   | 1100  | 2  | 1.13E-12 | 14  | 1.273 | knk5                      | Transport     |
| DMRNW_015097325.1:17101  | NW_015097325.1 | 17101  | 17900  | 800   | 1  | 1.77E-10 | 33  | 4.125 |                           |               |
| DMRNW_015097332.1:18801  | NW_015097332.1 | 18801  | 20600  | 1800  | 1  | 5.28E-09 | 24  | 1.333 | LOC106908395              |               |
| DMRNW_015097332.1:54301  | NW_015097332.1 | 54301  | 56500  | 2200  | 1  | 2.40E-09 | 54  | 2.455 | LOC106908398;LOC106908399 |               |
| DMRNW_015097335.1:1101   | NW_015097335.1 | 1101   | 4200   | 3100  | 5  | 9.37E-17 | 54  | 1.742 | LOC106908402              |               |
| DMRNW_015097335.1:12501  | NW_015097335.1 | 12501  | 13200  | 700   | 1  | 1.22E-09 | 13  | 1.857 | LOC106908402              |               |
| DMRNW_015097335.1:14501  | NW_015097335.1 | 14501  | 20900  | 6400  | 6  | 4.21E-10 | 157 | 2.453 | LOC106908402;LOC106908403 |               |
| DMRNW_015097335.1:25001  | NW_015097335.1 | 25001  | 27900  | 2900  | 2  | 2.54E-12 | 70  | 2.414 |                           |               |
| DMRNW_015097336.1:18001  | NW_015097336.1 | 18001  | 18200  | 200   | 2  | 7.87E-12 | 3   | 1.5   | LOC106908409              |               |
| DMRNW_015097336.1:23501  | NW_015097336.1 | 23501  | 24300  | 800   | 1  | 1.20E-08 | 10  | 1.25  | LOC106908409              |               |
| DMRNW_015097351.1:65401  | NW_015097351.1 | 65401  | 67800  | 2400  | 2  | 1.46E-14 | 27  | 1.125 | LOC106908457              |               |
| DMRNW_015097353.1:26801  | NW_015097353.1 | 26801  | 27100  | 300   | 1  | 4.38E-08 | 5   | 1.667 | LOC106908470              |               |
| DMRNW_015097356.1:1401   | NW_015097356.1 | 1401   | 3800   | 2400  | 12 | 4.35E-32 | 111 | 4.625 |                           |               |
| DMRNW_015097356.1:9701   | NW_015097356.1 | 9701   | 10400  | 700   | 4  | 4.92E-19 | 22  | 3.143 |                           |               |
| DMRNW_015097357.1:50601  | NW_015097357.1 | 50601  | 52500  | 1900  | 1  | 7.68E-09 | 18  | 0.947 | LOC106908481              |               |
| DMRNW_015097360.1:43601  | NW_015097360.1 | 43601  | 45000  | 1400  | 2  | 6.32E-17 | 33  | 2.357 | LOC106908494              |               |
| DMRNW_015097365.1:24401  | NW_015097365.1 | 24401  | 25000  | 600   | 1  | 4.71E-11 | 23  | 3.833 |                           |               |

|                         |                |       |       |       |   |          |     |        |                           |  |                      |
|-------------------------|----------------|-------|-------|-------|---|----------|-----|--------|---------------------------|--|----------------------|
| DMRNW_015097383.1:43301 | NW_015097383.1 | 43301 | 44100 | 800   | 2 | 2.00E-14 | 22  | 2.75   |                           |  |                      |
| DMRNW_015097395.1:13701 | NW_015097395.1 | 13701 | 14200 | 500   | 3 | 2.09E-18 | 12  | 2.4    | LOC106908599              |  |                      |
| DMRNW_015097406.1:24501 | NW_015097406.1 | 24501 | 25400 | 900   | 1 | 6.49E-08 | 13  | 1.444  | LOC106908632              |  |                      |
| DMRNW_015097406.1:36901 | NW_015097406.1 | 36901 | 39100 | 2200  | 2 | 4.42E-64 | 120 | 5.455  | LOC106908632              |  |                      |
| DMRNW_015097406.1:44801 | NW_015097406.1 | 44801 | 46100 | 1300  | 1 | 2.50E-10 | 28  | 2.154  |                           |  |                      |
| DMRNW_015097408.1:65301 | NW_015097408.1 | 65301 | 66100 | 800   | 1 | 5.95E-11 | 25  | 3.125  |                           |  |                      |
| DMRNW_015097415.1:67701 | NW_015097415.1 | 67701 | 70300 | 2600  | 1 | 7.22E-08 | 76  | 2.923  |                           |  |                      |
| DMRNW_015097416.1:61901 | NW_015097416.1 | 61901 | 63900 | 2000  | 1 | 2.25E-10 | 44  | 2.2    |                           |  |                      |
| DMRNW_015097418.1:49801 | NW_015097418.1 | 49801 | 50500 | 700   | 4 | 1.17E-19 | 25  | 3.571  | LOC106908689              |  |                      |
| DMRNW_015097426.1:45801 | NW_015097426.1 | 45801 | 46800 | 1000  | 1 | 8.38E-09 | 51  | 5.1    | LOC106908709              |  |                      |
| DMRNW_015097431.1:15401 | NW_015097431.1 | 15401 | 18100 | 2700  | 2 | 1.24E-08 | 83  | 3.074  | LOC106908727              |  |                      |
| DMRNW_015097431.1:83801 | NW_015097431.1 | 83801 | 84700 | 900   | 1 | 8.42E-08 | 32  | 3.556  |                           |  |                      |
| DMRNW_015097433.1:6301  | NW_015097433.1 | 6301  | 7000  | 700   | 2 | 9.81E-10 | 28  | 4      |                           |  |                      |
| DMRNW_015097433.1:11801 | NW_015097433.1 | 11801 | 12500 | 700   | 2 | 1.55E-14 | 7   | 1      |                           |  |                      |
| DMRNW_015097433.1:46601 | NW_015097433.1 | 46601 | 46900 | 300   | 1 | 9.87E-09 | 5   | 1.667  |                           |  |                      |
| DMRNW_015097442.1:26601 | NW_015097442.1 | 26601 | 27700 | 1100  | 1 | 2.42E-10 | 41  | 3.727  | LOC106908768              |  |                      |
| DMRNW_015097449.1:2901  | NW_015097449.1 | 2901  | 5500  | 2600  | 1 | 7.77E-08 | 80  | 3.077  | LOC106908788              |  |                      |
| DMRNW_015097449.1:42701 | NW_015097449.1 | 42701 | 44200 | 1500  | 3 | 2.23E-21 | 33  | 2.2    |                           |  | Unknown              |
| DMRNW_015097449.1:46601 | NW_015097449.1 | 46601 | 47500 | 900   | 6 | 7.72E-16 | 6   | 0.667  | katnb1                    |  | Unknown              |
| DMRNW_015097449.1:70501 | NW_015097449.1 | 70501 | 71700 | 1200  | 2 | 1.90E-09 | 58  | 4.833  | kifc3                     |  | Cytoskeleton         |
| DMRNW_015097457.1:46001 | NW_015097457.1 | 46001 | 62500 | 16500 | 1 | 9.99E-08 | 490 | 2.97   |                           |  |                      |
| DMRNW_015097460.1:201   | NW_015097460.1 | 201   | 1500  | 1300  | 1 | 5.43E-08 | 28  | 2.154  |                           |  |                      |
| DMRNW_015097480.1:22201 | NW_015097480.1 | 22201 | 23700 | 1500  | 3 | 3.07E-15 | 90  | 6      |                           |  |                      |
| DMRNW_015097482.1:41601 | NW_015097482.1 | 41601 | 42400 | 800   | 1 | 5.02E-09 | 12  | 1.5    |                           |  |                      |
| DMRNW_015097485.1:38401 | NW_015097485.1 | 38401 | 38900 | 500   | 1 | 3.93E-08 | 5   | 1      |                           |  |                      |
| DMRNW_015097488.1:8701  | NW_015097488.1 | 8701  | 9500  | 800   | 1 | 8.43E-11 | 5   | 0.625  |                           |  |                      |
| DMRNW_015097488.1:34201 | NW_015097488.1 | 34201 | 40700 | 6500  | 1 | 8.13E-09 | 89  | 1.369  |                           |  |                      |
| DMRNW_015097495.1:16001 | NW_015097495.1 | 16001 | 16500 | 500   | 1 | 6.91E-08 | 13  | 2.6    | LOC106908920;LOC106908921 |  |                      |
| DMRNW_015097496.1:10901 | NW_015097496.1 | 10901 | 15700 | 4800  | 2 | 4.26E-10 | 103 | 2.146  |                           |  |                      |
| DMRNW_015097505.1:40201 | NW_015097505.1 | 40201 | 42100 | 1900  | 1 | 2.98E-08 | 33  | 1.737  | LOC106908951              |  |                      |
| DMRNW_015097526.1:47301 | NW_015097526.1 | 47301 | 47600 | 300   | 1 | 6.38E-10 | 3   | 1      | cherp                     |  | Metabolism           |
| DMRNW_015097526.1:60701 | NW_015097526.1 | 60701 | 61300 | 600   | 2 | 1.17E-10 | 18  | 3      |                           |  |                      |
| DMRNW_015097534.1:20601 | NW_015097534.1 | 20601 | 21800 | 1200  | 2 | 1.79E-08 | 20  | 1.667  | LOC106909045              |  |                      |
| DMRNW_015097537.1:43001 | NW_015097537.1 | 43001 | 43400 | 400   | 1 | 6.30E-08 | 5   | 1.25   |                           |  |                      |
| DMRNW_015097551.1:41801 | NW_015097551.1 | 41801 | 45200 | 3400  | 3 | 8.12E-13 | 49  | 1.441  | LOC106909086              |  |                      |
| DMRNW_015097558.1:4201  | NW_015097558.1 | 4201  | 5300  | 1100  | 2 | 1.06E-20 | 45  | 4.091  | hsd12                     |  | Metabolism           |
| DMRNW_015097561.1:32301 | NW_015097561.1 | 32301 | 33000 | 700   | 1 | 1.14E-08 | 85  | 12.143 | bub1                      |  | Cell Cycle           |
| DMRNW_015097581.1:33101 | NW_015097581.1 | 33101 | 34300 | 1200  | 1 | 1.05E-08 | 33  | 2.75   |                           |  |                      |
| DMRNW_015097583.1:47501 | NW_015097583.1 | 47501 | 49900 | 2400  | 1 | 1.31E-10 | 48  | 2      |                           |  |                      |
| DMRNW_015097588.1:37001 | NW_015097588.1 | 37001 | 37400 | 400   | 2 | 6.67E-12 | 14  | 3.5    | atg5                      |  | Metabolism           |
| DMRNW_015097603.1:22501 | NW_015097603.1 | 22501 | 25600 | 3100  | 1 | 2.09E-08 | 90  | 2.903  |                           |  |                      |
| DMRNW_015097604.1:34801 | NW_015097604.1 | 34801 | 35800 | 1000  | 1 | 1.36E-10 | 62  | 6.2    | LOC106909253              |  |                      |
| DMRNW_015097616.1:53901 | NW_015097616.1 | 53901 | 55600 | 1700  | 4 | 2.89E-18 | 47  | 2.765  |                           |  |                      |
| DMRNW_015097617.1:43901 | NW_015097617.1 | 43901 | 44700 | 800   | 2 | 7.31E-17 | 7   | 0.875  |                           |  |                      |
| DMRNW_015097628.1:41001 | NW_015097628.1 | 41001 | 41300 | 300   | 1 | 1.75E-09 | 10  | 3.333  |                           |  |                      |
| DMRNW_015097661.1:7001  | NW_015097661.1 | 7001  | 18900 | 11900 | 2 | 1.02E-08 | 559 | 4.697  |                           |  |                      |
| DMRNW_015097685.1:43701 | NW_015097685.1 | 43701 | 45600 | 1900  | 1 | 6.83E-09 | 61  | 3.211  | LOC106909478              |  |                      |
| DMRNW_015097717.1:50301 | NW_015097717.1 | 50301 | 51200 | 900   | 1 | 9.22E-10 | 39  | 4.333  |                           |  |                      |
| DMRNW_015097726.1:43401 | NW_015097726.1 | 43401 | 44000 | 600   | 1 | 6.84E-09 | 13  | 2.167  |                           |  |                      |
| DMRNW_015097730.1:35401 | NW_015097730.1 | 35401 | 37600 | 2200  | 4 | 2.71E-22 | 57  | 2.591  | LOC106909601              |  |                      |
| DMRNW_015097741.1:18201 | NW_015097741.1 | 18201 | 19900 | 1700  | 1 | 1.14E-13 | 73  | 4.294  | LOC106909643              |  |                      |
| DMRNW_015097744.1:50101 | NW_015097744.1 | 50101 | 50600 | 500   | 2 | 4.80E-09 | 31  | 6.2    | LOC106909654              |  |                      |
| DMRNW_015097760.1:44401 | NW_015097760.1 | 44401 | 44700 | 300   | 1 | 8.70E-09 | 6   | 2      | LOC106909675              |  |                      |
| DMRNW_015097794.1:49901 | NW_015097794.1 | 49901 | 50796 | 896   | 2 | 1.59E-10 | 24  | 2.679  |                           |  |                      |
| DMRNW_015097815.1:27801 | NW_015097815.1 | 27801 | 28700 | 900   | 3 | 2.56E-27 | 50  | 5.556  | LOC106909806              |  |                      |
| DMRNW_015097815.1:32301 | NW_015097815.1 | 32301 | 32800 | 500   | 2 | 5.50E-22 | 34  | 6.8    | LOC106909806              |  |                      |
| DMRNW_015097824.1:30101 | NW_015097824.1 | 30101 | 30500 | 400   | 1 | 3.94E-08 | 20  | 5      |                           |  |                      |
| DMRNW_015097829.1:60301 | NW_015097829.1 | 60301 | 61600 | 1300  | 3 | 1.80E-14 | 19  | 1.462  |                           |  |                      |
| DMRNW_015097849.1:11201 | NW_015097849.1 | 11201 | 14500 | 3300  | 1 | 2.05E-08 | 82  | 2.485  |                           |  |                      |
| DMRNW_015097859.1:37501 | NW_015097859.1 | 37501 | 38100 | 600   | 1 | 6.48E-08 | 16  | 2.667  | LOC106909897              |  |                      |
| DMRNW_015097861.1:5301  | NW_015097861.1 | 5301  | 10800 | 5500  | 1 | 8.68E-11 | 197 | 3.582  | LOC106909901              |  |                      |
| DMRNW_015097861.1:45001 | NW_015097861.1 | 45001 | 46600 | 1600  | 1 | 2.08E-08 | 59  | 3.688  | spn2                      |  | Extracellular Matrix |
| DMRNW_015097871.1:7001  | NW_015097871.1 | 7001  | 7800  | 800   | 1 | 1.26E-09 | 34  | 4.25   |                           |  |                      |
| DMRNW_015097884.1:401   | NW_015097884.1 | 401   | 1200  | 800   | 1 | 1.81E-09 | 26  | 3.25   |                           |  |                      |
| DMRNW_015097892.1:8601  | NW_015097892.1 | 8601  | 10600 | 2000  | 1 | 3.32E-08 | 64  | 3.2    |                           |  |                      |
| DMRNW_015097894.1:1     | NW_015097894.1 | 1     | 1100  | 1100  | 1 | 4.45E-16 | 37  | 3.364  |                           |  |                      |
| DMRNW_015097899.1:7201  | NW_015097899.1 | 7201  | 9200  | 2000  | 1 | 4.40E-16 | 99  | 4.95   |                           |  |                      |
| DMRNW_015097899.1:38701 | NW_015097899.1 | 38701 | 38900 | 200   | 1 | 5.55E-10 | 1   | 0.5    |                           |  |                      |
| DMRNW_015097903.1:16101 | NW_015097903.1 | 16101 | 16400 | 300   | 2 | 3.40E-08 | 5   | 1.667  | LOC106909996              |  |                      |
| DMRNW_015097910.1:28301 | NW_015097910.1 | 28301 | 29700 | 1400  | 1 | 2.31E-09 | 53  | 3.786  | LOC106910008              |  |                      |
| DMRNW_015097917.1:41701 | NW_015097917.1 | 41701 | 42400 | 700   | 1 | 6.33E-42 | 31  | 4.429  |                           |  |                      |
| DMRNW_015097923.1:45901 | NW_015097923.1 | 45901 | 46900 | 1000  | 1 | 3.35E-08 | 41  | 4.1    |                           |  |                      |
| DMRNW_015097926.1:46001 | NW_015097926.1 | 46001 | 46500 | 500   | 2 | 5.51E-10 | 11  | 2.2    |                           |  |                      |
| DMRNW_015097940.1:44301 | NW_015097940.1 | 44301 | 44900 | 600   | 1 | 5.99E-11 | 5   | 0.833  | desi1                     |  | Unknown              |

|                         |                |       |       |      |   |          |     |       |                           |               |
|-------------------------|----------------|-------|-------|------|---|----------|-----|-------|---------------------------|---------------|
| DMRNW_015097941.1:7901  | NW_015097941.1 | 7901  | 13300 | 5400 | 1 | 5.64E-08 | 57  | 1.056 |                           |               |
| DMRNW_015097943.1:35401 | NW_015097943.1 | 35401 | 37100 | 1700 | 3 | 2.57E-26 | 42  | 2.471 |                           |               |
| DMRNW_015097947.1:5201  | NW_015097947.1 | 5201  | 5600  | 400  | 2 | 1.57E-10 | 0   | 0     |                           |               |
| DMRNW_015097950.1:27201 | NW_015097950.1 | 27201 | 28900 | 1700 | 1 | 8.56E-08 | 47  | 2.765 | LOC106910108              |               |
| DMRNW_015097951.1:1     | NW_015097951.1 | 1     | 500   | 500  | 2 | 1.27E-08 | 7   | 1.4   | LOC106910109              |               |
| DMRNW_015097953.1:39201 | NW_015097953.1 | 39201 | 40300 | 1100 | 2 | 6.23E-10 | 27  | 2.455 | LOC106910118;LOC106910115 |               |
| DMRNW_015097957.1:1     | NW_015097957.1 | 1     | 1900  | 1900 | 3 | 7.35E-24 | 70  | 3.684 | gpatch1                   |               |
| DMRNW_015097965.1:8901  | NW_015097965.1 | 8901  | 9300  | 400  | 1 | 2.35E-12 | 27  | 6.75  | LOC106910156              |               |
| DMRNW_015097971.1:64001 | NW_015097971.1 | 64001 | 66100 | 2100 | 2 | 3.74E-11 | 61  | 2.905 | trnae-cuc;trnae-uuc       |               |
| DMRNW_015097990.1:33301 | NW_015097990.1 | 33301 | 39100 | 5800 | 1 | 3.86E-08 | 266 | 4.586 |                           |               |
| DMRNW_015097996.1:45601 | NW_015097996.1 | 45601 | 45900 | 300  | 1 | 4.02E-09 | 22  | 7.333 | LOC106910224              |               |
| DMRNW_015098038.1:27101 | NW_015098038.1 | 27101 | 28100 | 1000 | 2 | 4.86E-10 | 19  | 1.9   | LOC106910324              |               |
| DMRNW_015098041.1:12401 | NW_015098041.1 | 12401 | 16500 | 4100 | 1 | 1.64E-11 | 87  | 2.122 | rbm42                     | Transcription |
| DMRNW_015098041.1:37801 | NW_015098041.1 | 37801 | 40500 | 2700 | 1 | 3.43E-09 | 54  | 2     | LOC106910333              |               |
| DMRNW_015098041.1:45901 | NW_015098041.1 | 45901 | 48000 | 2100 | 1 | 3.46E-08 | 27  | 1.286 |                           |               |
| DMRNW_015098041.1:58901 | NW_015098041.1 | 58901 | 60600 | 1700 | 1 | 2.04E-11 | 31  | 1.824 | LOC106910337              |               |
| DMRNW_015098041.1:76401 | NW_015098041.1 | 76401 | 77100 | 700  | 2 | 3.52E-20 | 15  | 2.143 | LOC106910334              |               |
| DMRNW_015098041.1:83101 | NW_015098041.1 | 83101 | 84700 | 1600 | 1 | 1.54E-09 | 37  | 2.312 |                           |               |
| DMRNW_015098048.1:44201 | NW_015098048.1 | 44201 | 47300 | 3100 | 1 | 5.64E-08 | 33  | 1.065 | LOC106910357              |               |
| DMRNW_015098061.1:29001 | NW_015098061.1 | 29001 | 30300 | 1300 | 1 | 6.69E-10 | 28  | 2.154 |                           |               |
| DMRNW_015098067.1:28701 | NW_015098067.1 | 28701 | 29700 | 1000 | 1 | 2.28E-25 | 44  | 4.4   |                           |               |
| DMRNW_015098069.1:34501 | NW_015098069.1 | 34501 | 37300 | 2800 | 5 | 1.47E-38 | 119 | 4.25  | ii7r                      |               |
| DMRNW_015098070.1:1001  | NW_015098070.1 | 1001  | 1400  | 400  | 2 | 1.29E-09 | 12  | 3     |                           |               |
| DMRNW_015098075.1:39601 | NW_015098075.1 | 39601 | 42384 | 2784 | 1 | 3.93E-10 | 106 | 3.807 |                           |               |
| DMRNW_015098079.1:31701 | NW_015098079.1 | 31701 | 32000 | 300  | 1 | 1.26E-10 | 2   | 0.667 |                           |               |
| DMRNW_015098085.1:1901  | NW_015098085.1 | 1901  | 5400  | 3500 | 1 | 6.18E-11 | 132 | 3.771 |                           |               |
| DMRNW_015098094.1:14501 | NW_015098094.1 | 14501 | 15200 | 700  | 1 | 5.88E-08 | 18  | 2.571 |                           |               |
| DMRNW_015098094.1:20901 | NW_015098094.1 | 20901 | 21700 | 800  | 1 | 1.11E-08 | 31  | 3.875 |                           |               |
| DMRNW_015098098.1:9301  | NW_015098098.1 | 9301  | 14200 | 4900 | 4 | 1.24E-11 | 117 | 2.388 | LOC106910464;LOC106910463 |               |
| DMRNW_015098098.1:33301 | NW_015098098.1 | 33301 | 34500 | 1200 | 2 | 2.00E-08 | 33  | 2.75  |                           |               |
| DMRNW_015098114.1:36001 | NW_015098114.1 | 36001 | 41200 | 5200 | 1 | 9.55E-09 | 262 | 5.038 | Imbrd2;LOC106910490       |               |
| DMRNW_015098114.1:54501 | NW_015098114.1 | 54501 | 55400 | 900  | 2 | 2.10E-29 | 17  | 1.889 |                           |               |
| DMRNW_015098123.1:16401 | NW_015098123.1 | 16401 | 17400 | 1000 | 1 | 2.25E-15 | 28  | 2.8   | LOC106910508              |               |
| DMRNW_015098123.1:30301 | NW_015098123.1 | 30301 | 30500 | 200  | 1 | 1.30E-14 | 4   | 2     | LOC106910508              |               |
| DMRNW_015098177.1:18001 | NW_015098177.1 | 18001 | 18700 | 700  | 2 | 5.34E-15 | 22  | 3.143 |                           |               |
| DMRNW_015098177.1:29201 | NW_015098177.1 | 29201 | 32900 | 3700 | 1 | 5.90E-23 | 96  | 2.595 |                           |               |
| DMRNW_015098193.1:32901 | NW_015098193.1 | 32901 | 37400 | 4500 | 7 | 1.54E-17 | 100 | 2.222 | LOC106910680              |               |
| DMRNW_015098202.1:10301 | NW_015098202.1 | 10301 | 11400 | 1100 | 1 | 8.78E-08 | 22  | 2     | LOC106910707              |               |
| DMRNW_015098213.1:45601 | NW_015098213.1 | 45601 | 49000 | 3400 | 7 | 5.95E-19 | 128 | 3.765 | LOC106910731              |               |
| DMRNW_015098230.1:5601  | NW_015098230.1 | 5601  | 6200  | 600  | 2 | 2.12E-09 | 17  | 2.833 |                           |               |
| DMRNW_015098240.1:17401 | NW_015098240.1 | 17401 | 23400 | 6000 | 1 | 2.80E-12 | 154 | 2.567 | ms4a4a                    |               |
| DMRNW_015098248.1:45401 | NW_015098248.1 | 45401 | 47200 | 1800 | 1 | 2.98E-10 | 36  | 2     |                           |               |
| DMRNW_015098269.1:1     | NW_015098269.1 | 1     | 700   | 700  | 2 | 1.64E-14 | 36  | 5.143 |                           |               |
| DMRNW_015098269.1:3901  | NW_015098269.1 | 3901  | 4400  | 500  | 2 | 5.21E-12 | 29  | 5.8   |                           |               |
| DMRNW_015098269.1:29701 | NW_015098269.1 | 29701 | 30900 | 1200 | 1 | 1.18E-09 | 47  | 3.917 |                           |               |
| DMRNW_015098275.1:11201 | NW_015098275.1 | 11201 | 15200 | 4000 | 2 | 1.10E-09 | 83  | 2.075 |                           |               |
| DMRNW_015098286.1:33601 | NW_015098286.1 | 33601 | 34500 | 900  | 1 | 2.73E-09 | 39  | 4.333 | LOC106910902              |               |
| DMRNW_015098292.1:21901 | NW_015098292.1 | 21901 | 22200 | 300  | 1 | 5.75E-08 | 7   | 2.333 | LOC106910908              |               |
| DMRNW_015098349.1:27001 | NW_015098349.1 | 27001 | 27400 | 400  | 1 | 4.99E-09 | 11  | 2.75  | LOC106911003              |               |
| DMRNW_015098364.1:11701 | NW_015098364.1 | 11701 | 13200 | 1500 | 1 | 2.67E-08 | 31  | 2.067 |                           |               |
| DMRNW_015098368.1:13901 | NW_015098368.1 | 13901 | 14300 | 400  | 1 | 3.01E-11 | 0   | 0     | LOC106911028              |               |
| DMRNW_015098372.1:11801 | NW_015098372.1 | 11801 | 14700 | 2900 | 1 | 8.75E-09 | 131 | 4.517 | ddx46                     | Transcription |
| DMRNW_015098391.1:18701 | NW_015098391.1 | 18701 | 19000 | 300  | 1 | 3.60E-08 | 10  | 3.333 | LOC106911065              |               |
| DMRNW_015098395.1:12001 | NW_015098395.1 | 12001 | 14200 | 2200 | 1 | 2.16E-11 | 79  | 3.591 | LOC106911071              |               |
| DMRNW_015098398.1:2101  | NW_015098398.1 | 2101  | 2300  | 200  | 1 | 1.25E-08 | 2   | 1     |                           |               |
| DMRNW_015098403.1:34101 | NW_015098403.1 | 34101 | 34400 | 300  | 1 | 2.05E-10 | 3   | 1     |                           |               |
| DMRNW_015098425.1:1501  | NW_015098425.1 | 1501  | 2800  | 1300 | 1 | 5.33E-10 | 47  | 3.615 | LOC106911119              |               |
| DMRNW_015098428.1:21801 | NW_015098428.1 | 21801 | 27100 | 5300 | 1 | 2.40E-12 | 127 | 2.396 | LOC106911130;LOC106911131 |               |
| DMRNW_015098428.1:34101 | NW_015098428.1 | 34101 | 35000 | 900  | 1 | 6.01E-10 | 25  | 2.778 |                           |               |
| DMRNW_015098456.1:15601 | NW_015098456.1 | 15601 | 15900 | 300  | 1 | 3.80E-08 | 25  | 8.333 |                           |               |
| DMRNW_015098496.1:31201 | NW_015098496.1 | 31201 | 32352 | 1152 | 1 | 3.30E-10 | 4   | 0.347 |                           |               |
| DMRNW_015098530.1:15201 | NW_015098530.1 | 15201 | 18500 | 3300 | 1 | 8.76E-10 | 76  | 2.303 |                           |               |
| DMRNW_015098547.1:29601 | NW_015098547.1 | 29601 | 30100 | 500  | 1 | 1.89E-13 | 10  | 2     |                           |               |
| DMRNW_015098550.1:10401 | NW_015098550.1 | 10401 | 12800 | 2400 | 1 | 3.68E-12 | 115 | 4.792 | LOC106911352              |               |
| DMRNW_015098560.1:24801 | NW_015098560.1 | 24801 | 25100 | 300  | 2 | 1.50E-08 | 5   | 1.667 |                           |               |
| DMRNW_015098560.1:30301 | NW_015098560.1 | 30301 | 30925 | 625  | 2 | 1.38E-14 | 13  | 2.08  |                           |               |
| DMRNW_015098580.1:15201 | NW_015098580.1 | 15201 | 16800 | 1600 | 3 | 3.18E-15 | 30  | 1.875 | LOC106911414              |               |
| DMRNW_015098593.1:601   | NW_015098593.1 | 601   | 2200  | 1600 | 1 | 3.26E-10 | 26  | 1.625 |                           |               |
| DMRNW_015098606.1:28901 | NW_015098606.1 | 28901 | 29300 | 400  | 1 | 1.97E-08 | 18  | 4.5   |                           |               |
| DMRNW_015098615.1:28801 | NW_015098615.1 | 28801 | 29600 | 800  | 2 | 2.92E-29 | 5   | 0.625 | LOC106911464              |               |
| DMRNW_015098623.1:18501 | NW_015098623.1 | 18501 | 20100 | 1600 | 1 | 9.95E-10 | 56  | 3.5   | LOC106911475              |               |
| DMRNW_015098636.1:6401  | NW_015098636.1 | 6401  | 8200  | 1800 | 2 | 1.70E-09 | 41  | 2.278 |                           |               |
| DMRNW_015098640.1:20401 | NW_015098640.1 | 20401 | 26400 | 6000 | 3 | 2.69E-10 | 131 | 2.183 |                           |               |
| DMRNW_015098650.1:27401 | NW_015098650.1 | 27401 | 27900 | 500  | 4 | 3.06E-58 | 5   | 1     | LOC106911510              |               |

|                         |                |       |       |      |    |          |     |       |                           |
|-------------------------|----------------|-------|-------|------|----|----------|-----|-------|---------------------------|
| DMRNW_015098653.1:25601 | NW_015098653.1 | 25601 | 26900 | 1300 | 1  | 8.35E-10 | 28  | 2.154 |                           |
| DMRNW_015098670.1:27101 | NW_015098670.1 | 27101 | 28000 | 900  | 2  | 5.92E-10 | 59  | 6.556 |                           |
| DMRNW_015098684.1:6201  | NW_015098684.1 | 6201  | 12400 | 6200 | 1  | 2.28E-10 | 114 | 1.839 |                           |
| DMRNW_015098684.1:16501 | NW_015098684.1 | 16501 | 18900 | 2400 | 1  | 1.77E-09 | 39  | 1.625 |                           |
| DMRNW_015098700.1:21501 | NW_015098700.1 | 21501 | 22000 | 500  | 3  | 1.94E-34 | 1   | 0.2   |                           |
| DMRNW_015098707.1:23901 | NW_015098707.1 | 23901 | 24500 | 600  | 2  | 1.93E-16 | 19  | 3.167 |                           |
| DMRNW_015098721.1:25501 | NW_015098721.1 | 25501 | 27800 | 2300 | 1  | 7.88E-08 | 71  | 3.087 |                           |
| DMRNW_015098764.1:18601 | NW_015098764.1 | 18601 | 21000 | 2400 | 2  | 3.94E-14 | 125 | 5.208 | LOC106911668              |
| DMRNW_015098775.1:301   | NW_015098775.1 | 301   | 1100  | 800  | 1  | 2.89E-08 | 24  | 3     |                           |
| DMRNW_015098779.1:22101 | NW_015098779.1 | 22101 | 26700 | 4600 | 14 | 2.75E-22 | 283 | 6.152 |                           |
| DMRNW_015098835.1:18201 | NW_015098835.1 | 18201 | 19300 | 1100 | 1  | 6.24E-12 | 37  | 3.364 |                           |
| DMRNW_015098839.1:101   | NW_015098839.1 | 101   | 1600  | 1500 | 1  | 2.66E-09 | 37  | 2.467 |                           |
| DMRNW_015098839.1:4401  | NW_015098839.1 | 4401  | 11900 | 7500 | 13 | 4.23E-28 | 232 | 3.093 | LOC106911767              |
| DMRNW_015098839.1:16501 | NW_015098839.1 | 16501 | 18700 | 2200 | 3  | 1.53E-09 | 86  | 3.909 |                           |
| DMRNW_015098888.1:22101 | NW_015098888.1 | 22101 | 24800 | 2700 | 1  | 3.96E-08 | 40  | 1.481 |                           |
| DMRNW_015098907.1:301   | NW_015098907.1 | 301   | 1900  | 1600 | 1  | 3.97E-09 | 39  | 2.438 |                           |
| DMRNW_015098942.1:9901  | NW_015098942.1 | 9901  | 11500 | 1600 | 2  | 2.94E-09 | 40  | 2.5   | LOC106911901;LOC106911899 |
| DMRNW_015098987.1:16401 | NW_015098987.1 | 16401 | 18300 | 1900 | 1  | 1.75E-09 | 73  | 3.842 | LOC106911958              |
| DMRNW_015098988.1:1     | NW_015098988.1 | 1     | 2100  | 2100 | 1  | 8.72E-09 | 16  | 0.762 |                           |
| DMRNW_015099009.1:13301 | NW_015099009.1 | 13301 | 16000 | 2700 | 2  | 2.02E-09 | 67  | 2.481 | LOC106911984              |
| DMRNW_015099035.1:1     | NW_015099035.1 | 1     | 2800  | 2800 | 1  | 2.44E-09 | 73  | 2.607 | LOC106912017              |
| DMRNW_015099057.1:13801 | NW_015099057.1 | 13801 | 15600 | 1800 | 1  | 3.85E-09 | 55  | 3.056 |                           |
| DMRNW_015099078.1:201   | NW_015099078.1 | 201   | 10000 | 9800 | 27 | 1.83E-19 | 238 | 2.429 |                           |
| DMRNW_015099097.1:601   | NW_015099097.1 | 601   | 2700  | 2100 | 3  | 3.09E-08 | 28  | 1.333 |                           |
| DMRNW_015099156.1:6301  | NW_015099156.1 | 6301  | 7600  | 1300 | 1  | 1.67E-09 | 47  | 3.615 | LOC106912130              |
| DMRNW_015099163.1:8701  | NW_015099163.1 | 8701  | 10700 | 2000 | 1  | 7.18E-09 | 43  | 2.15  |                           |
| DMRNW_015099190.1:19401 | NW_015099190.1 | 19401 | 19600 | 200  | 1  | 3.38E-08 | 12  | 6     |                           |
| DMRNW_015099193.1:9701  | NW_015099193.1 | 9701  | 12700 | 3000 | 1  | 1.38E-10 | 91  | 3.033 |                           |
| DMRNW_015099220.1:12201 | NW_015099220.1 | 12201 | 16400 | 4200 | 1  | 6.47E-09 | 152 | 3.619 | LOC106912204              |
| DMRNW_015099259.1:201   | NW_015099259.1 | 201   | 1600  | 1400 | 1  | 2.17E-09 | 64  | 4.571 |                           |
| DMRNW_015099259.1:2601  | NW_015099259.1 | 2601  | 4900  | 2300 | 1  | 1.91E-08 | 73  | 3.174 |                           |
| DMRNW_015099259.1:13901 | NW_015099259.1 | 13901 | 17200 | 3300 | 1  | 2.53E-15 | 171 | 5.182 | LOC106912258              |
| DMRNW_015099259.1:18201 | NW_015099259.1 | 18201 | 18675 | 475  | 2  | 8.43E-17 | 26  | 5.474 |                           |
| DMRNW_015099290.1:6501  | NW_015099290.1 | 6501  | 6800  | 300  | 1  | 3.42E-11 | 17  | 5.667 |                           |
| DMRNW_015099352.1:9501  | NW_015099352.1 | 9501  | 12000 | 2500 | 2  | 6.97E-09 | 61  | 2.44  | LOC106912363              |
| DMRNW_015099354.1:21201 | NW_015099354.1 | 21201 | 23000 | 1800 | 3  | 4.84E-12 | 19  | 1.056 |                           |
| DMRNW_015099366.1:5001  | NW_015099366.1 | 5001  | 5500  | 500  | 1  | 9.69E-10 | 19  | 3.8   |                           |
| DMRNW_015099372.1:13701 | NW_015099372.1 | 13701 | 15500 | 1800 | 1  | 6.42E-08 | 53  | 2.944 |                           |
| DMRNW_015099379.1:401   | NW_015099379.1 | 401   | 900   | 500  | 2  | 1.99E-09 | 12  | 2.4   |                           |
| DMRNW_015099381.1:5601  | NW_015099381.1 | 5601  | 11000 | 5400 | 12 | 2.66E-39 | 233 | 4.315 | cfap77;LOC106912394       |
| DMRNW_015099394.1:13501 | NW_015099394.1 | 13501 | 15500 | 2000 | 1  | 4.83E-13 | 28  | 1.4   |                           |
| DMRNW_015099412.1:12101 | NW_015099412.1 | 12101 | 12700 | 600  | 1  | 1.93E-09 | 28  | 4.667 |                           |
| DMRNW_015099419.1:12901 | NW_015099419.1 | 12901 | 13900 | 1000 | 2  | 2.00E-16 | 45  | 4.5   | LOC106912435              |
| DMRNW_015099445.1:1     | NW_015099445.1 | 1     | 1800  | 1800 | 9  | 1.82E-31 | 88  | 4.889 |                           |
| DMRNW_015099455.1:14201 | NW_015099455.1 | 14201 | 14800 | 600  | 1  | 3.00E-09 | 3   | 0.5   | LOC106912474              |
| DMRNW_015099465.1:4701  | NW_015099465.1 | 4701  | 6000  | 1300 | 1  | 2.46E-08 | 23  | 1.769 |                           |
| DMRNW_015099478.1:5601  | NW_015099478.1 | 5601  | 10000 | 4400 | 1  | 5.65E-08 | 46  | 1.045 |                           |
| DMRNW_015099538.1:7401  | NW_015099538.1 | 7401  | 9000  | 1600 | 7  | 3.91E-15 | 47  | 2.938 |                           |
| DMRNW_015099555.1:13901 | NW_015099555.1 | 13901 | 15099 | 1199 | 8  | 9.05E-15 | 58  | 4.837 |                           |
| DMRNW_015099624.1:301   | NW_015099624.1 | 301   | 800   | 500  | 2  | 9.25E-09 | 29  | 5.8   |                           |
| DMRNW_015099628.1:5501  | NW_015099628.1 | 5501  | 8200  | 2700 | 1  | 3.28E-08 | 15  | 0.556 |                           |
| DMRNW_015099632.1:14301 | NW_015099632.1 | 14301 | 14576 | 276  | 2  | 2.71E-17 | 12  | 4.348 |                           |
| DMRNW_015099641.1:1     | NW_015099641.1 | 1     | 1100  | 1100 | 4  | 2.80E-22 | 83  | 7.545 |                           |
| DMRNW_015099641.1:7001  | NW_015099641.1 | 7001  | 7900  | 900  | 3  | 1.50E-08 | 53  | 5.889 |                           |
| DMRNW_015099689.1:13501 | NW_015099689.1 | 13501 | 14000 | 500  | 1  | 2.76E-09 | 18  | 3.6   |                           |
| DMRNW_015099717.1:6601  | NW_015099717.1 | 6601  | 10800 | 4200 | 2  | 2.65E-09 | 142 | 3.381 |                           |
| DMRNW_015099748.1:1     | NW_015099748.1 | 1     | 2000  | 2000 | 5  | 1.37E-21 | 64  | 3.2   |                           |
| DMRNW_015099772.1:5601  | NW_015099772.1 | 5601  | 6800  | 1200 | 1  | 2.09E-09 | 20  | 1.667 |                           |
| DMRNW_015099774.1:7301  | NW_015099774.1 | 7301  | 12100 | 4800 | 1  | 1.30E-08 | 127 | 2.646 |                           |
| DMRNW_015099794.1:301   | NW_015099794.1 | 301   | 1800  | 1500 | 2  | 1.02E-08 | 39  | 2.6   | LOC106912714              |
| DMRNW_015099869.1:5901  | NW_015099869.1 | 5901  | 8300  | 2400 | 3  | 1.74E-18 | 52  | 2.167 | LOC106912772              |
| DMRNW_015099881.1:7401  | NW_015099881.1 | 7401  | 8000  | 600  | 2  | 8.88E-10 | 6   | 1     |                           |
| DMRNW_015099902.1:901   | NW_015099902.1 | 901   | 2900  | 2000 | 4  | 3.58E-13 | 18  | 0.9   | LOC106912802              |
| DMRNW_015099931.1:8901  | NW_015099931.1 | 8901  | 10600 | 1700 | 2  | 3.08E-12 | 64  | 3.765 | LOC106912823              |
| DMRNW_015099987.1:2701  | NW_015099987.1 | 2701  | 5500  | 2800 | 1  | 8.70E-08 | 87  | 3.107 | LOC106912848;LOC106912847 |
| DMRNW_015100024.1:201   | NW_015100024.1 | 201   | 1300  | 1100 | 2  | 2.12E-15 | 24  | 2.182 |                           |
| DMRNW_015100109.1:7501  | NW_015100109.1 | 7501  | 9200  | 1700 | 1  | 8.16E-08 | 22  | 1.294 |                           |
| DMRNW_015100116.1:101   | NW_015100116.1 | 101   | 2800  | 2700 | 2  | 7.25E-10 | 40  | 1.481 | LOC106912940;LOC106912939 |
| DMRNW_015100166.1:101   | NW_015100166.1 | 101   | 1400  | 1300 | 1  | 1.70E-08 | 39  | 3     | LOC106912960              |
| DMRNW_015100171.1:7001  | NW_015100171.1 | 7001  | 8100  | 1100 | 3  | 7.06E-17 | 45  | 4.091 |                           |
| DMRNW_015100221.1:13901 | NW_015100221.1 | 13901 | 15200 | 1300 | 1  | 2.69E-08 | 20  | 1.538 |                           |
| DMRNW_015100258.1:6401  | NW_015100258.1 | 6401  | 8600  | 2200 | 2  | 4.67E-10 | 77  | 3.5   |                           |
| DMRNW_015100298.1:14201 | NW_015100298.1 | 14201 | 14600 | 400  | 2  | 3.15E-25 | 19  | 4.75  |                           |
| DMRNW_015100391.1:1     | NW_015100391.1 | 1     | 2400  | 2400 | 2  | 4.02E-10 | 50  | 2.083 |                           |
| DMRNW_015100410.1:16401 | NW_015100410.1 | 16401 | 17100 | 700  | 1  | 3.06E-08 | 15  | 2.143 |                           |

|                         |                |       |       |      |   |          |    |       |              |  |
|-------------------------|----------------|-------|-------|------|---|----------|----|-------|--------------|--|
| DMRNW_015100425.1:17001 | NW_015100425.1 | 17001 | 18200 | 1200 | 1 | 8.77E-10 | 17 | 1.417 |              |  |
| DMRNW_015100450.1:301   | NW_015100450.1 | 301   | 2100  | 1800 | 2 | 2.69E-09 | 51 | 2.833 |              |  |
| DMRNW_015100451.1:1     | NW_015100451.1 | 1     | 800   | 800  | 1 | 1.05E-10 | 16 | 2     |              |  |
| DMRNW_015100582.1:7101  | NW_015100582.1 | 7101  | 7800  | 700  | 4 | 2.94E-15 | 31 | 4.429 |              |  |
| DMRNW_015100701.1:101   | NW_015100701.1 | 101   | 1100  | 1000 | 1 | 1.33E-08 | 14 | 1.4   |              |  |
| DMRNW_015100701.1:7001  | NW_015100701.1 | 7001  | 8900  | 1900 | 1 | 2.30E-08 | 25 | 1.316 |              |  |
| DMRNW_015100721.1:6901  | NW_015100721.1 | 6901  | 7200  | 300  | 1 | 9.64E-08 | 7  | 2.333 |              |  |
| DMRNW_015100788.1:1     | NW_015100788.1 | 1     | 1700  | 1700 | 2 | 4.36E-16 | 86 | 5.059 |              |  |
| DMRNW_015100788.1:6801  | NW_015100788.1 | 6801  | 7379  | 579  | 2 | 5.30E-11 | 30 | 5.181 |              |  |
| DMRNW_015100818.1:1     | NW_015100818.1 | 1     | 1300  | 1300 | 6 | 3.08E-17 | 15 | 1.154 | LOC106913163 |  |
| DMRNW_015100866.1:6201  | NW_015100866.1 | 6201  | 6600  | 400  | 1 | 2.11E-10 | 2  | 0.5   |              |  |
| DMRNW_015100884.1:2901  | NW_015100884.1 | 2901  | 6500  | 3600 | 3 | 1.60E-24 | 81 | 2.25  |              |  |
| DMRNW_015100891.1:1     | NW_015100891.1 | 1     | 300   | 300  | 2 | 2.54E-16 | 9  | 3     |              |  |
| DMRNW_015100941.1:3101  | NW_015100941.1 | 3101  | 6200  | 3100 | 1 | 4.78E-10 | 36 | 1.161 |              |  |
| DMRNW_015101011.1:2901  | NW_015101011.1 | 2901  | 4600  | 1700 | 2 | 6.11E-13 | 84 | 4.941 | LOC106913238 |  |
| DMRNW_015101025.1:3301  | NW_015101025.1 | 3301  | 4800  | 1500 | 1 | 1.26E-08 | 22 | 1.467 |              |  |
| DMRNW_015101045.1:201   | NW_015101045.1 | 201   | 1100  | 900  | 3 | 1.03E-22 | 16 | 1.778 |              |  |
| DMRNW_015101065.1:5301  | NW_015101065.1 | 5301  | 7500  | 2200 | 1 | 2.91E-08 | 39 | 1.773 | LOC106913260 |  |
| DMRNW_015101069.1:101   | NW_015101069.1 | 101   | 2400  | 2300 | 1 | 4.22E-08 | 49 | 2.13  | LOC106913262 |  |
| DMRNW_015101144.1:22001 | NW_015101144.1 | 22001 | 22600 | 600  | 3 | 1.37E-13 | 13 | 2.167 |              |  |
| DMRNW_015101204.1:2401  | NW_015101204.1 | 2401  | 2700  | 300  | 1 | 2.91E-09 | 8  | 2.667 |              |  |
| DMRNW_015101212.1:301   | NW_015101212.1 | 301   | 2700  | 2400 | 8 | 2.27E-21 | 89 | 3.708 |              |  |
| DMRNW_015101526.1:1     | NW_015101526.1 | 1     | 2300  | 2300 | 3 | 1.24E-08 | 34 | 1.478 | LOC106913412 |  |
| DMRNW_015101545.1:101   | NW_015101545.1 | 101   | 2767  | 2667 | 1 | 2.06E-12 | 84 | 3.15  |              |  |
| DMRNW_015101684.1:1     | NW_015101684.1 | 1     | 2200  | 2200 | 1 | 3.83E-08 | 40 | 1.818 |              |  |
| DMRNW_015101829.1:8001  | NW_015101829.1 | 8001  | 9138  | 1138 | 4 | 1.25E-12 | 35 | 3.076 |              |  |
| DMRNW_015101909.1:1     | NW_015101909.1 | 1     | 2000  | 2000 | 3 | 5.69E-11 | 76 | 3.8   |              |  |
| DMRNW_015101921.1:301   | NW_015101921.1 | 301   | 2000  | 1700 | 2 | 3.33E-09 | 25 | 1.471 | LOC106913512 |  |
| DMRNW_015101975.1:401   | NW_015101975.1 | 401   | 1940  | 1540 | 1 | 2.27E-08 | 32 | 2.078 |              |  |
| DMRNW_015101979.1:1     | NW_015101979.1 | 1     | 400   | 400  | 3 | 5.05E-14 | 13 | 3.25  |              |  |
| DMRNW_015102195.1:101   | NW_015102195.1 | 101   | 1700  | 1600 | 1 | 9.47E-08 | 45 | 2.812 |              |  |
| DMRNW_015102199.1:1201  | NW_015102199.1 | 1201  | 1500  | 300  | 1 | 3.70E-08 | 7  | 2.333 |              |  |
| DMRNW_015102345.1:1     | NW_015102345.1 | 1     | 1600  | 1600 | 1 | 6.78E-09 | 27 | 1.688 |              |  |
| DMRNW_015102363.1:1101  | NW_015102363.1 | 1101  | 1300  | 200  | 1 | 1.65E-08 | 11 | 5.5   |              |  |
| DMRNW_015102393.1:1201  | NW_015102393.1 | 1201  | 1567  | 367  | 2 | 1.97E-25 | 6  | 1.635 |              |  |
| DMRNW_015102471.1:301   | NW_015102471.1 | 301   | 800   | 500  | 1 | 3.73E-09 | 27 | 5.4   |              |  |
| DMRNW_015102482.1:1     | NW_015102482.1 | 1     | 700   | 700  | 1 | 4.32E-13 | 35 | 5     |              |  |
| DMRNW_015102624.1:1     | NW_015102624.1 | 1     | 1400  | 1400 | 3 | 1.92E-20 | 47 | 3.357 |              |  |
| DMRNW_015102632.1:301   | NW_015102632.1 | 301   | 1500  | 1200 | 2 | 5.68E-11 | 65 | 5.417 |              |  |
| DMRNW_015102652.1:1201  | NW_015102652.1 | 1201  | 1419  | 219  | 1 | 2.96E-09 | 1  | 0.457 | LOC106913619 |  |
| DMRNW_015102846.1:101   | NW_015102846.1 | 101   | 1319  | 1219 | 1 | 4.13E-09 | 20 | 1.641 |              |  |
| DMRNW_015102876.1:201   | NW_015102876.1 | 201   | 1300  | 1100 | 2 | 3.91E-18 | 26 | 2.364 |              |  |
| DMRNW_015102896.1:201   | NW_015102896.1 | 201   | 1300  | 1100 | 1 | 1.26E-08 | 18 | 1.636 |              |  |
| DMRNW_015102899.1:201   | NW_015102899.1 | 201   | 1300  | 1100 | 1 | 5.06E-08 | 18 | 1.636 |              |  |
| DMRNW_015102964.1:101   | NW_015102964.1 | 101   | 1200  | 1100 | 2 | 1.91E-14 | 59 | 5.364 |              |  |
| DMRNW_015103022.1:1     | NW_015103022.1 | 1     | 1100  | 1100 | 2 | 1.81E-17 | 58 | 5.273 |              |  |
| DMRNW_015103284.1:101   | NW_015103284.1 | 101   | 900   | 800  | 1 | 6.60E-08 | 45 | 5.625 |              |  |
| DMRNW_015103351.1:1     | NW_015103351.1 | 1     | 1133  | 1133 | 3 | 5.84E-23 | 20 | 1.765 |              |  |
| DMRNW_015103352.1:1     | NW_015103352.1 | 1     | 1100  | 1100 | 2 | 2.06E-09 | 42 | 3.818 |              |  |
| DMRNW_015103385.1:1     | NW_015103385.1 | 1     | 1000  | 1000 | 1 | 8.07E-09 | 81 | 8.1   |              |  |
| DMRNW_015103396.1:101   | NW_015103396.1 | 101   | 400   | 300  | 1 | 9.30E-09 | 13 | 4.333 |              |  |
| DMRNW_015103575.1:1     | NW_015103575.1 | 1     | 1067  | 1067 | 2 | 4.03E-09 | 62 | 5.811 |              |  |
| DMRNW_015103583.1:1     | NW_015103583.1 | 1     | 1065  | 1065 | 2 | 1.52E-12 | 18 | 1.69  |              |  |
| DMRNW_015103760.1:1     | NW_015103760.1 | 1     | 800   | 800  | 2 | 7.36E-09 | 28 | 3.5   |              |  |
| DMRNW_015103936.1:101   | NW_015103936.1 | 101   | 900   | 800  | 3 | 4.76E-11 | 14 | 1.75  |              |  |
| DMRNW_015104085.1:1     | NW_015104085.1 | 1     | 900   | 900  | 2 | 2.28E-12 | 61 | 6.778 |              |  |
| DMRNW_015104319.1:601   | NW_015104319.1 | 601   | 865   | 265  | 1 | 2.91E-08 | 6  | 2.264 |              |  |
| DMRNW_015104423.1:1     | NW_015104423.1 | 1     | 700   | 700  | 1 | 8.12E-08 | 37 | 5.286 |              |  |
| DMRNW_015104444.1:1     | NW_015104444.1 | 1     | 839   | 839  | 6 | 3.90E-21 | 34 | 4.052 | LOC106913742 |  |
| DMRNW_015104574.1:1     | NW_015104574.1 | 1     | 400   | 400  | 1 | 8.52E-14 | 20 | 5     |              |  |
| DMRNW_015104614.1:401   | NW_015104614.1 | 401   | 600   | 200  | 1 | 8.39E-09 | 3  | 1.5   |              |  |
| DMRNW_015104649.1:201   | NW_015104649.1 | 201   | 600   | 400  | 2 | 2.56E-08 | 24 | 6     |              |  |
| DMRNW_015104719.1:1     | NW_015104719.1 | 1     | 500   | 500  | 4 | 1.13E-21 | 14 | 2.8   |              |  |
| DMRNW_015104776.1:301   | NW_015104776.1 | 301   | 779   | 479  | 3 | 5.77E-11 | 24 | 5.01  |              |  |
| DMRNW_015104907.1:1     | NW_015104907.1 | 1     | 700   | 700  | 4 | 3.64E-25 | 1  | 0.143 |              |  |
| DMRNW_015105204.1:201   | NW_015105204.1 | 201   | 600   | 400  | 1 | 1.51E-12 | 21 | 5.25  |              |  |
| DMRNW_015105247.1:201   | NW_015105247.1 | 201   | 700   | 500  | 3 | 4.71E-24 | 20 | 4     |              |  |
| DMRNW_015105248.1:1     | NW_015105248.1 | 1     | 700   | 700  | 4 | 1.70E-11 | 1  | 0.143 |              |  |
| DMRNW_015105365.1:1     | NW_015105365.1 | 1     | 400   | 400  | 3 | 2.61E-11 | 22 | 5.5   |              |  |
| DMRNW_015105367.1:1     | NW_015105367.1 | 1     | 500   | 500  | 1 | 9.27E-08 | 12 | 2.4   |              |  |
| DMRNW_015105398.1:1     | NW_015105398.1 | 1     | 689   | 689  | 1 | 1.38E-08 | 3  | 0.435 |              |  |
| DMRNW_015105604.1:1     | NW_015105604.1 | 1     | 664   | 664  | 2 | 2.36E-10 | 8  | 1.205 |              |  |
| DMRNW_015105675.1:301   | NW_015105675.1 | 301   | 656   | 356  | 1 | 7.55E-08 | 13 | 3.652 |              |  |
| DMRNW_015105725.1:201   | NW_015105725.1 | 201   | 653   | 453  | 2 | 1.04E-15 | 17 | 3.753 |              |  |
| DMRNW_015105735.1:1     | NW_015105735.1 | 1     | 600   | 600  | 1 | 4.39E-08 | 5  | 0.833 |              |  |
| DMRNW_015105746.1:1     | NW_015105746.1 | 1     | 650   | 650  | 1 | 5.88E-09 | 10 | 1.538 |              |  |

|                       |                |     |     |     |   |          |    |        |  |
|-----------------------|----------------|-----|-----|-----|---|----------|----|--------|--|
| DMRNW_015105782.1:1   | NW_015105782.1 | 1   | 600 | 600 | 2 | 8.57E-10 | 23 | 3.833  |  |
| DMRNW_015105862.1:1   | NW_015105862.1 | 1   | 636 | 636 | 1 | 5.48E-11 | 12 | 1.887  |  |
| DMRNW_015105955.1:201 | NW_015105955.1 | 201 | 400 | 200 | 1 | 4.68E-10 | 22 | 11     |  |
| DMRNW_015106042.1:1   | NW_015106042.1 | 1   | 600 | 600 | 1 | 1.02E-10 | 23 | 3.833  |  |
| DMRNW_015106351.1:1   | NW_015106351.1 | 1   | 585 | 585 | 1 | 8.18E-09 | 6  | 1.026  |  |
| DMRNW_015106412.1:101 | NW_015106412.1 | 101 | 400 | 300 | 1 | 5.16E-09 | 12 | 4      |  |
| DMRNW_015106451.1:101 | NW_015106451.1 | 101 | 500 | 400 | 1 | 2.48E-10 | 16 | 4      |  |
| DMRNW_015106551.1:1   | NW_015106551.1 | 1   | 568 | 568 | 1 | 1.61E-10 | 7  | 1.232  |  |
| DMRNW_015106750.1:1   | NW_015106750.1 | 1   | 552 | 552 | 2 | 5.93E-09 | 10 | 1.812  |  |
| DMRNW_015106776.1:1   | NW_015106776.1 | 1   | 400 | 400 | 2 | 7.81E-11 | 20 | 5      |  |
| DMRNW_015106781.1:101 | NW_015106781.1 | 101 | 549 | 449 | 1 | 8.66E-13 | 13 | 2.895  |  |
| DMRNW_015106888.1:1   | NW_015106888.1 | 1   | 541 | 541 | 1 | 7.65E-12 | 1  | 0.185  |  |
| DMRNW_015106975.1:1   | NW_015106975.1 | 1   | 534 | 534 | 4 | 5.49E-16 | 11 | 2.06   |  |
| DMRNW_015107034.1:101 | NW_015107034.1 | 101 | 500 | 400 | 4 | 3.45E-23 | 12 | 3      |  |
| DMRNW_015107077.1:1   | NW_015107077.1 | 1   | 527 | 527 | 1 | 5.31E-09 | 21 | 3.985  |  |
| DMRNW_015107142.1:1   | NW_015107142.1 | 1   | 523 | 523 | 1 | 4.12E-08 | 36 | 6.883  |  |
| DMRNW_015107190.1:1   | NW_015107190.1 | 1   | 519 | 519 | 2 | 2.02E-11 | 0  | 0      |  |
| DMRNW_015107361.1:1   | NW_015107361.1 | 1   | 500 | 500 | 2 | 4.93E-09 | 7  | 1.4    |  |
| DMRNW_015107761.1:1   | NW_015107761.1 | 1   | 476 | 476 | 1 | 1.79E-08 | 32 | 6.723  |  |
| DMRNW_015107907.1:101 | NW_015107907.1 | 101 | 465 | 365 | 2 | 5.27E-15 | 42 | 11.507 |  |
| DMRNW_015107943.1:101 | NW_015107943.1 | 101 | 300 | 200 | 1 | 9.18E-12 | 9  | 4.5    |  |
| DMRNW_015107963.1:1   | NW_015107963.1 | 1   | 462 | 462 | 2 | 4.68E-21 | 23 | 4.978  |  |
| DMRNW_015108185.1:1   | NW_015108185.1 | 1   | 400 | 400 | 2 | 3.06E-19 | 11 | 2.75   |  |
| DMRNW_015108308.1:101 | NW_015108308.1 | 101 | 400 | 300 | 1 | 5.79E-08 | 14 | 4.667  |  |
| DMRNW_015108343.1:201 | NW_015108343.1 | 201 | 400 | 200 | 1 | 1.77E-08 | 16 | 8      |  |
| DMRNW_015108344.1:1   | NW_015108344.1 | 1   | 435 | 435 | 1 | 2.84E-08 | 21 | 4.828  |  |
| DMRNW_015108355.1:1   | NW_015108355.1 | 1   | 400 | 400 | 1 | 4.47E-08 | 6  | 1.5    |  |
| DMRNW_015108429.1:1   | NW_015108429.1 | 1   | 429 | 429 | 3 | 1.70E-12 | 3  | 0.699  |  |
| DMRNW_015108447.1:1   | NW_015108447.1 | 1   | 400 | 400 | 1 | 3.42E-09 | 3  | 0.75   |  |
| DMRNW_015108484.1:1   | NW_015108484.1 | 1   | 300 | 300 | 1 | 9.53E-09 | 14 | 4.667  |  |
| DMRNW_015108581.1:1   | NW_015108581.1 | 1   | 400 | 400 | 1 | 2.19E-10 | 13 | 3.25   |  |
| DMRNW_015109084.1:1   | NW_015109084.1 | 1   | 384 | 384 | 1 | 1.96E-09 | 9  | 2.344  |  |
| DMRNW_015109094.1:1   | NW_015109094.1 | 1   | 383 | 383 | 2 | 1.97E-10 | 6  | 1.567  |  |
| DMRNW_015109449.1:1   | NW_015109449.1 | 1   | 361 | 361 | 1 | 2.05E-09 | 18 | 4.986  |  |
| DMRNW_015109597.1:1   | NW_015109597.1 | 1   | 300 | 300 | 1 | 9.43E-10 | 4  | 1.333  |  |
| DMRNW_015109642.1:1   | NW_015109642.1 | 1   | 349 | 349 | 3 | 5.65E-12 | 32 | 9.169  |  |
| DMRNW_015109764.1:1   | NW_015109764.1 | 1   | 341 | 341 | 3 | 3.00E-10 | 4  | 1.173  |  |
| DMRNW_015109793.1:1   | NW_015109793.1 | 1   | 340 | 340 | 2 | 1.16E-13 | 16 | 4.706  |  |
| DMRNW_015109837.1:1   | NW_015109837.1 | 1   | 300 | 300 | 1 | 1.52E-09 | 5  | 1.667  |  |
| DMRNW_015109849.1:1   | NW_015109849.1 | 1   | 200 | 200 | 1 | 7.17E-14 | 11 | 5.5    |  |
| DMRNW_015109867.1:101 | NW_015109867.1 | 101 | 300 | 200 | 2 | 2.34E-13 | 7  | 3.5    |  |
| DMRNW_015109991.1:1   | NW_015109991.1 | 1   | 300 | 300 | 1 | 5.94E-10 | 19 | 6.333  |  |
| DMRNW_015110049.1:101 | NW_015110049.1 | 101 | 300 | 200 | 1 | 6.76E-10 | 6  | 3      |  |
| DMRNW_015110283.1:101 | NW_015110283.1 | 101 | 300 | 200 | 1 | 1.91E-11 | 12 | 6      |  |
| DMRNW_015110636.1:1   | NW_015110636.1 | 1   | 292 | 292 | 1 | 8.77E-13 | 3  | 1.027  |  |
| DMRNW_015110642.1:101 | NW_015110642.1 | 101 | 292 | 192 | 2 | 5.32E-15 | 8  | 4.167  |  |
| DMRNW_015110721.1:1   | NW_015110721.1 | 1   | 287 | 287 | 1 | 9.19E-09 | 15 | 5.226  |  |
| DMRNW_015110737.1:1   | NW_015110737.1 | 1   | 286 | 286 | 1 | 1.56E-08 | 11 | 3.846  |  |
| DMRNW_015110809.1:1   | NW_015110809.1 | 1   | 282 | 282 | 2 | 5.62E-17 | 18 | 6.383  |  |
| DMRNW_015111278.1:1   | NW_015111278.1 | 1   | 259 | 259 | 1 | 7.11E-08 | 17 | 6.564  |  |
| DMRNW_015111386.1:101 | NW_015111386.1 | 101 | 254 | 154 | 1 | 4.42E-08 | 4  | 2.597  |  |
| DMRNW_015111397.1:1   | NW_015111397.1 | 1   | 254 | 254 | 1 | 7.17E-08 | 9  | 3.543  |  |
| DMRNW_015111631.1:1   | NW_015111631.1 | 1   | 200 | 200 | 1 | 3.00E-08 | 32 | 16     |  |
| DMRNW_015111706.1:1   | NW_015111706.1 | 1   | 239 | 239 | 2 | 4.43E-10 | 1  | 0.418  |  |
| DMRNW_015111745.1:1   | NW_015111745.1 | 1   | 237 | 237 | 1 | 3.49E-08 | 38 | 16.034 |  |
| DMRNW_015112242.1:1   | NW_015112242.1 | 1   | 200 | 200 | 1 | 8.23E-09 | 3  | 1.5    |  |
| DMRNW_015112440.1:101 | NW_015112440.1 | 101 | 207 | 107 | 1 | 7.38E-10 | 2  | 1.869  |  |



**Supplemental Table S2**  
**DMR List SFW vs NFW p<1e-07**

| DMR Name                  | Chr            | Start   | Stop    | Length | # Sig Win | minP     | CpG # | CpG Density | Gene Annotation      | Gene Category |
|---------------------------|----------------|---------|---------|--------|-----------|----------|-------|-------------|----------------------|---------------|
| DMRNW_015094511.1:439501  | NW_015094511.1 | 439501  | 441300  | 1800   | 1         | 4.05E-08 | 56    | 3.111       | hlf                  | Transcription |
| DMRNW_015094511.1:739201  | NW_015094511.1 | 739201  | 743300  | 4100   | 1         | 4.00E-08 | 134   | 3.268       | rbfox3               |               |
| DMRNW_015094511.1:1369501 | NW_015094511.1 | 1369501 | 1369700 | 200    | 2         | 6.76E-16 | 7     | 3.5         |                      |               |
| DMRNW_015094511.1:1490701 | NW_015094511.1 | 1490701 | 1492200 | 1500   | 1         | 4.92E-08 | 91    | 6.067       | crif3                |               |
| DMRNW_015094512.1:228501  | NW_015094512.1 | 228501  | 229200  | 700    | 2         | 7.17E-11 | 63    | 9           | LOC106917188         |               |
| DMRNW_015094512.1:268901  | NW_015094512.1 | 268901  | 271400  | 2500   | 5         | 1.42E-18 | 57    | 2.28        | kctd14               | Metabolism    |
| DMRNW_015094512.1:536301  | NW_015094512.1 | 536301  | 537900  | 1600   | 1         | 5.58E-08 | 21    | 1.312       | LOC106918686         |               |
| DMRNW_015094512.1:614801  | NW_015094512.1 | 614801  | 615900  | 1100   | 2         | 3.59E-14 | 45    | 4.091       | axl                  | Receptor      |
| DMRNW_015094513.1:774101  | NW_015094513.1 | 774101  | 775200  | 1100   | 1         | 7.51E-08 | 57    | 5.182       | LOC106925924         |               |
| DMRNW_015094513.1:1048201 | NW_015094513.1 | 1048201 | 1050500 | 2300   | 1         | 1.05E-08 | 47    | 2.043       | LOC106924831         |               |
| DMRNW_015094516.1:123601  | NW_015094516.1 | 123601  | 126600  | 3000   | 2         | 1.63E-12 | 41    | 1.367       |                      |               |
| DMRNW_015094517.1:444601  | NW_015094517.1 | 444601  | 447000  | 2400   | 1         | 1.00E-08 | 115   | 4.792       | ahctf1               | Transcription |
| DMRNW_015094517.1:569801  | NW_015094517.1 | 569801  | 570900  | 1100   | 1         | 2.35E-10 | 46    | 4.182       | pld1                 | Metabolism    |
| DMRNW_015094518.1:628901  | NW_015094518.1 | 628901  | 629500  | 600    | 1         | 8.02E-08 | 38    | 6.333       | LOC106914001         |               |
| DMRNW_015094518.1:770401  | NW_015094518.1 | 770401  | 772200  | 1800   | 2         | 8.30E-11 | 44    | 2.444       | LOC106914036         |               |
| DMRNW_015094520.1:570001  | NW_015094520.1 | 570001  | 572100  | 2100   | 3         | 1.54E-08 | 59    | 2.81        | LOC106914917         |               |
| DMRNW_015094521.1:504701  | NW_015094521.1 | 504701  | 506100  | 1400   | 1         | 4.34E-10 | 44    | 3.143       | ptprq                | Receptor      |
| DMRNW_015094523.1:253301  | NW_015094523.1 | 253301  | 253600  | 300    | 3         | 2.26E-25 | 2     | 0.667       |                      |               |
| DMRNW_015094523.1:270001  | NW_015094523.1 | 270001  | 270600  | 600    | 1         | 2.23E-10 | 15    | 2.5         | hectd2               | EST           |
| DMRNW_015094523.1:551601  | NW_015094523.1 | 551601  | 552100  | 500    | 1         | 9.86E-08 | 27    | 5.4         | LOC106916177         |               |
| DMRNW_015094523.1:557301  | NW_015094523.1 | 557301  | 558600  | 1300   | 1         | 2.58E-11 | 32    | 2.462       | LOC106916177         |               |
| DMRNW_015094523.1:560401  | NW_015094523.1 | 560401  | 564100  | 3700   | 2         | 2.79E-24 | 95    | 2.568       | LOC106916177         |               |
| DMRNW_015094523.1:576501  | NW_015094523.1 | 576501  | 576900  | 400    | 1         | 5.15E-08 | 16    | 4           | LOC106916177         |               |
| DMRNW_015094523.1:651201  | NW_015094523.1 | 651201  | 651500  | 300    | 1         | 6.73E-08 | 4     | 1.333       | LOC106916288         |               |
| DMRNW_015094523.1:795901  | NW_015094523.1 | 795901  | 796200  | 300    | 1         | 6.05E-08 | 13    | 4.333       | LOC106916297         |               |
| DMRNW_015094523.1:856801  | NW_015094523.1 | 856801  | 857000  | 200    | 1         | 2.36E-08 | 2     | 1           | LOC106916388         |               |
| DMRNW_015094523.1:873501  | NW_015094523.1 | 873501  | 878600  | 5100   | 1         | 1.66E-08 | 144   | 2.824       | LOC106916388;bmpr1a  | Receptor      |
| DMRNW_015094523.1:883101  | NW_015094523.1 | 883101  | 886700  | 3600   | 3         | 6.35E-22 | 144   | 4           | LOC106916373         |               |
| DMRNW_015094524.1:268201  | NW_015094524.1 | 268201  | 269500  | 1300   | 1         | 1.40E-11 | 15    | 1.154       | LOC106916498         |               |
| DMRNW_015094525.1:343201  | NW_015094525.1 | 343201  | 343800  | 600    | 1         | 3.96E-08 | 6     | 1           | LOC106916830         |               |
| DMRNW_015094527.1:651001  | NW_015094527.1 | 651001  | 651500  | 500    | 2         | 7.43E-31 | 17    | 3.4         |                      |               |
| DMRNW_015094528.1:141801  | NW_015094528.1 | 141801  | 142500  | 700    | 1         | 7.51E-15 | 17    | 2.429       | Irfn1;LOC106917642   | Cytoskeleton  |
| DMRNW_015094529.1:242201  | NW_015094529.1 | 242201  | 243400  | 1200   | 1         | 2.29E-10 | 17    | 1.417       |                      |               |
| DMRNW_015094530.1:469301  | NW_015094530.1 | 469301  | 470400  | 1100   | 1         | 7.01E-09 | 20    | 1.818       |                      |               |
| DMRNW_015094530.1:565001  | NW_015094530.1 | 565001  | 568200  | 3200   | 1         | 6.59E-11 | 80    | 2.5         |                      |               |
| DMRNW_015094532.1:690401  | NW_015094532.1 | 690401  | 690900  | 500    | 1         | 9.89E-08 | 24    | 4.8         |                      |               |
| DMRNW_015094533.1:63101   | NW_015094533.1 | 63101   | 63400   | 300    | 1         | 1.90E-08 | 6     | 2           | LOC106918986         |               |
| DMRNW_015094533.1:833701  | NW_015094533.1 | 833701  | 836100  | 2400   | 2         | 4.37E-08 | 86    | 3.583       |                      |               |
| DMRNW_015094534.1:401401  | NW_015094534.1 | 401401  | 401900  | 500    | 4         | 4.54E-13 | 34    | 6.8         | LOC106919683         |               |
| DMRNW_015094535.1:197101  | NW_015094535.1 | 197101  | 197800  | 700    | 2         | 1.33E-17 | 25    | 3.571       | LOC106920206         |               |
| DMRNW_015094535.1:314101  | NW_015094535.1 | 314101  | 315300  | 1200   | 1         | 1.86E-08 | 47    | 3.917       | LOC106920275         |               |
| DMRNW_015094536.1:505701  | NW_015094536.1 | 505701  | 507600  | 1900   | 2         | 2.87E-09 | 51    | 2.684       | cacna1g;LOC106920572 | Transport     |
| DMRNW_015094537.1:202101  | NW_015094537.1 | 202101  | 202500  | 400    | 1         | 5.28E-09 | 6     | 1.5         | LOC106920813         |               |
| DMRNW_015094537.1:474901  | NW_015094537.1 | 474901  | 481000  | 6100   | 5         | 4.05E-12 | 182   | 2.984       |                      |               |
| DMRNW_015094538.1:355201  | NW_015094538.1 | 355201  | 356400  | 1200   | 2         | 7.96E-10 | 42    | 3.5         | LOC106921446         |               |
| DMRNW_015094538.1:440801  | NW_015094538.1 | 440801  | 441800  | 1000   | 1         | 3.28E-08 | 40    | 4           | LOC106921480         |               |
| DMRNW_015094539.1:169201  | NW_015094539.1 | 169201  | 169700  | 500    | 2         | 4.42E-11 | 22    | 4.4         | LOC106922005         |               |
| DMRNW_015094541.1:60601   | NW_015094541.1 | 60601   | 61600   | 1000   | 5         | 3.80E-54 | 24    | 2.4         | LOC106922848         |               |
| DMRNW_015094541.1:634701  | NW_015094541.1 | 634701  | 636000  | 1300   | 7         | 2.33E-22 | 53    | 4.077       | lrp2                 | Receptor      |
| DMRNW_015094542.1:398501  | NW_015094542.1 | 398501  | 399300  | 800    | 1         | 7.30E-12 | 44    | 5.5         | LOC106923545         |               |
| DMRNW_015094542.1:490101  | NW_015094542.1 | 490101  | 491300  | 1200   | 2         | 6.14E-13 | 24    | 2           |                      |               |
| DMRNW_015094542.1:557301  | NW_015094542.1 | 557301  | 559000  | 1700   | 1         | 1.64E-09 | 67    | 3.941       | hivep1               | Transcription |
| DMRNW_015094542.1:626801  | NW_015094542.1 | 626801  | 629300  | 2500   | 2         | 5.14E-12 | 64    | 2.56        |                      |               |
| DMRNW_015094542.1:633101  | NW_015094542.1 | 633101  | 634000  | 900    | 1         | 1.41E-11 | 24    | 2.667       |                      |               |
| DMRNW_015094543.1:386801  | NW_015094543.1 | 386801  | 387200  | 400    | 1         | 9.16E-08 | 0     | 0           |                      |               |
| DMRNW_015094548.1:403701  | NW_015094548.1 | 403701  | 403900  | 200    | 1         | 2.74E-14 | 6     | 3           | LOC106925676         |               |
| DMRNW_015094548.1:408301  | NW_015094548.1 | 408301  | 409000  | 700    | 5         | 3.37E-11 | 2     | 0.286       | LOC106925676         |               |
| DMRNW_015094548.1:584901  | NW_015094548.1 | 584901  | 585300  | 400    | 1         | 5.26E-11 | 2     | 0.5         | drosha               | Transcription |
| DMRNW_015094548.1:655001  | NW_015094548.1 | 655001  | 656500  | 1500   | 1         | 5.51E-08 | 93    | 6.2         | drosha               | Transcription |
| DMRNW_015094549.1:796701  | NW_015094549.1 | 796701  | 797700  | 1000   | 1         | 9.55E-08 | 20    | 2           |                      |               |
| DMRNW_015094550.1:18701   | NW_015094550.1 | 18701   | 20400   | 1700   | 1         | 7.04E-08 | 100   | 5.882       | LOC106926148         |               |
| DMRNW_015094550.1:377701  | NW_015094550.1 | 377701  | 379100  | 1400   | 2         | 1.48E-11 | 48    | 3.429       | snx14                | Signaling     |
| DMRNW_015094553.1:295501  | NW_015094553.1 | 295501  | 296100  | 600    | 1         | 4.53E-16 | 13    | 2.167       | LOC106927059         |               |
| DMRNW_015094553.1:405601  | NW_015094553.1 | 405601  | 405900  | 300    | 1         | 6.68E-08 | 7     | 2.333       | LOC106927059         |               |
| DMRNW_015094553.1:670901  | NW_015094553.1 | 670901  | 671300  | 400    | 1         | 3.77E-11 | 30    | 7.5         | LOC106927177         |               |
| DMRNW_015094554.1:227701  | NW_015094554.1 | 227701  | 229200  | 1500   | 2         | 3.66E-08 | 60    | 4           | magi2                | Metabolism    |
| DMRNW_015094554.1:426901  | NW_015094554.1 | 426901  | 427400  | 500    | 1         | 8.58E-08 | 13    | 2.6         |                      |               |
| DMRNW_015094555.1:209801  | NW_015094555.1 | 209801  | 210100  | 300    | 1         | 8.31E-11 | 0     | 0           | abhd13               | Metabolism    |

|                          |                |        |        |      |   |          |     |       |                           |               |
|--------------------------|----------------|--------|--------|------|---|----------|-----|-------|---------------------------|---------------|
| DMRNW_015094556.1:144601 | NW_015094556.1 | 144601 | 145900 | 1300 | 1 | 2.36E-08 | 32  | 2.462 | LOC106927668              |               |
| DMRNW_015094557.1:235701 | NW_015094557.1 | 235701 | 236700 | 1000 | 1 | 3.97E-09 | 25  | 2.5   | LOC106928029              |               |
| DMRNW_015094559.1:4701   | NW_015094559.1 | 4701   | 13000  | 8300 | 4 | 1.54E-09 | 303 | 3.651 |                           |               |
| DMRNW_015094559.1:666301 | NW_015094559.1 | 666301 | 666600 | 300  | 2 | 3.99E-20 | 12  | 4     | tspan9                    | Cytoskeleton  |
| DMRNW_015094562.1:632501 | NW_015094562.1 | 632501 | 632800 | 300  | 2 | 2.56E-10 | 9   | 3     |                           |               |
| DMRNW_015094563.1:364301 | NW_015094563.1 | 364301 | 364900 | 600  | 1 | 1.45E-13 | 24  | 4     |                           |               |
| DMRNW_015094564.1:299801 | NW_015094564.1 | 299801 | 300400 | 600  | 2 | 8.49E-10 | 24  | 4     | st18                      | Transcription |
| DMRNW_015094564.1:723001 | NW_015094564.1 | 723001 | 724600 | 1600 | 1 | 6.38E-08 | 35  | 2.188 | LOC106930846              |               |
| DMRNW_015094565.1:555801 | NW_015094565.1 | 555801 | 556800 | 1000 | 1 | 5.84E-10 | 25  | 2.5   | ccdc73                    |               |
| DMRNW_015094569.1:317901 | NW_015094569.1 | 317901 | 318300 | 400  | 1 | 4.67E-08 | 17  | 4.25  |                           |               |
| DMRNW_015094570.1:592901 | NW_015094570.1 | 592901 | 593700 | 800  | 2 | 2.11E-08 | 29  | 3.625 | atp13a3                   | Transport     |
| DMRNW_015094571.1:201701 | NW_015094571.1 | 201701 | 203200 | 1500 | 1 | 4.42E-09 | 49  | 3.267 | nfix                      | Transcription |
| DMRNW_015094572.1:818701 | NW_015094572.1 | 818701 | 822100 | 3400 | 4 | 5.28E-09 | 41  | 1.206 |                           |               |
| DMRNW_015094573.1:53401  | NW_015094573.1 | 53401  | 54500  | 1100 | 1 | 4.43E-08 | 36  | 3.273 |                           |               |
| DMRNW_015094573.1:228401 | NW_015094573.1 | 228401 | 232400 | 4000 | 5 | 1.06E-12 | 59  | 1.475 | LOC106933764              |               |
| DMRNW_015094573.1:234701 | NW_015094573.1 | 234701 | 237100 | 2400 | 2 | 2.27E-12 | 62  | 2.583 |                           |               |
| DMRNW_015094573.1:241101 | NW_015094573.1 | 241101 | 243200 | 2100 | 1 | 3.32E-08 | 87  | 4.143 | LOC106933769              |               |
| DMRNW_015094574.1:401    | NW_015094574.1 | 401    | 4200   | 3800 | 3 | 6.04E-11 | 142 | 3.737 |                           |               |
| DMRNW_015094574.1:365701 | NW_015094574.1 | 365701 | 367200 | 1500 | 1 | 7.89E-09 | 35  | 2.333 |                           |               |
| DMRNW_015094575.1:139301 | NW_015094575.1 | 139301 | 144500 | 5200 | 1 | 5.81E-08 | 125 | 2.404 | slc1a5                    | Transport     |
| DMRNW_015094575.1:462601 | NW_015094575.1 | 462601 | 465600 | 3000 | 1 | 6.41E-08 | 67  | 2.233 |                           |               |
| DMRNW_015094575.1:571901 | NW_015094575.1 | 571901 | 572700 | 800  | 1 | 1.10E-09 | 15  | 1.875 | ptgir                     | Receptor      |
| DMRNW_015094577.1:193101 | NW_015094577.1 | 193101 | 193600 | 500  | 1 | 4.45E-08 | 9   | 1.8   |                           |               |
| DMRNW_015094578.1:351601 | NW_015094578.1 | 351601 | 352600 | 1000 | 1 | 7.71E-11 | 10  | 1     | ltbp2                     |               |
| DMRNW_015094579.1:415801 | NW_015094579.1 | 415801 | 417500 | 1700 | 1 | 4.51E-10 | 55  | 3.235 | cog2                      |               |
| DMRNW_015094582.1:199301 | NW_015094582.1 | 199301 | 200200 | 900  | 1 | 7.35E-08 | 17  | 1.889 | cabp7                     | Signaling     |
| DMRNW_015094583.1:501    | NW_015094583.1 | 501    | 1800   | 1300 | 2 | 8.06E-11 | 41  | 3.154 |                           |               |
| DMRNW_015094583.1:235201 | NW_015094583.1 | 235201 | 235700 | 500  | 1 | 3.35E-08 | 30  | 6     | zc3h13                    |               |
| DMRNW_015094583.1:419501 | NW_015094583.1 | 419501 | 420700 | 1200 | 1 | 5.22E-08 | 33  | 2.75  | LOC106905396              |               |
| DMRNW_015094588.1:363801 | NW_015094588.1 | 363801 | 366400 | 2600 | 2 | 3.73E-09 | 91  | 3.5   | dab2ip                    | Signaling     |
| DMRNW_015094590.1:369001 | NW_015094590.1 | 369001 | 369500 | 500  | 1 | 9.86E-09 | 16  | 3.2   |                           |               |
| DMRNW_015094594.1:47901  | NW_015094594.1 | 47901  | 48100  | 200  | 1 | 8.74E-10 | 1   | 0.5   | ube2z                     | Metabolism    |
| DMRNW_015094595.1:177601 | NW_015094595.1 | 177601 | 178600 | 1000 | 2 | 6.81E-11 | 10  | 1     |                           |               |
| DMRNW_015094596.1:101    | NW_015094596.1 | 101    | 600    | 500  | 1 | 7.49E-10 | 20  | 4     | urad                      |               |
| DMRNW_015094599.1:1101   | NW_015094599.1 | 1101   | 1900   | 800  | 1 | 2.60E-10 | 17  | 2.125 |                           |               |
| DMRNW_015094599.1:53901  | NW_015094599.1 | 53901  | 59400  | 5500 | 2 | 1.29E-08 | 207 | 3.764 | arid2                     |               |
| DMRNW_015094600.1:152801 | NW_015094600.1 | 152801 | 153700 | 900  | 1 | 7.40E-08 | 76  | 8.444 | LOC106910366              |               |
| DMRNW_015094600.1:365901 | NW_015094600.1 | 365901 | 367800 | 1900 | 1 | 2.04E-08 | 66  | 3.474 | LOC106910644              |               |
| DMRNW_015094604.1:335901 | NW_015094604.1 | 335901 | 336500 | 600  | 1 | 2.40E-11 | 22  | 3.667 |                           |               |
| DMRNW_015094606.1:135401 | NW_015094606.1 | 135401 | 136500 | 1100 | 1 | 2.51E-08 | 12  | 1.091 | LOC106912280              |               |
| DMRNW_015094606.1:363801 | NW_015094606.1 | 363801 | 366700 | 2900 | 1 | 1.68E-11 | 74  | 2.552 | LOC106912368              |               |
| DMRNW_015094607.1:499801 | NW_015094607.1 | 499801 | 500100 | 300  | 1 | 1.76E-08 | 13  | 4.333 | fbxl7                     | Transcription |
| DMRNW_015094612.1:545701 | NW_015094612.1 | 545701 | 549400 | 3700 | 1 | 4.03E-08 | 100 | 2.703 | hmcn1                     | Immune        |
| DMRNW_015094613.1:143701 | NW_015094613.1 | 143701 | 144100 | 400  | 1 | 2.46E-11 | 12  | 3     | LOC106913903              |               |
| DMRNW_015094615.1:201    | NW_015094615.1 | 201    | 1000   | 800  | 1 | 2.52E-08 | 18  | 2.25  |                           |               |
| DMRNW_015094615.1:12901  | NW_015094615.1 | 12901  | 13900  | 1000 | 1 | 4.01E-08 | 25  | 2.5   |                           |               |
| DMRNW_015094616.1:412301 | NW_015094616.1 | 412301 | 413000 | 700  | 1 | 9.24E-08 | 30  | 4.286 | LOC106914031              |               |
| DMRNW_015094617.1:86501  | NW_015094617.1 | 86501  | 87300  | 800  | 1 | 5.35E-09 | 12  | 1.5   | nkd1                      | Unknown       |
| DMRNW_015094618.1:451401 | NW_015094618.1 | 451401 | 452300 | 900  | 1 | 2.20E-08 | 17  | 1.889 | LOC106914058              |               |
| DMRNW_015094619.1:39201  | NW_015094619.1 | 39201  | 41300  | 2100 | 1 | 2.22E-17 | 62  | 2.952 | hs3st6                    |               |
| DMRNW_015094619.1:427901 | NW_015094619.1 | 427901 | 428600 | 700  | 1 | 2.64E-10 | 25  | 3.571 |                           |               |
| DMRNW_015094620.1:404801 | NW_015094620.1 | 404801 | 407900 | 3100 | 3 | 5.39E-10 | 37  | 1.194 | LOC106914091;LOC106914092 |               |
| DMRNW_015094622.1:424301 | NW_015094622.1 | 424301 | 425400 | 1100 | 2 | 3.63E-14 | 30  | 2.727 | LOC106914181              |               |
| DMRNW_015094622.1:678901 | NW_015094622.1 | 678901 | 681000 | 2100 | 2 | 1.80E-12 | 36  | 1.714 |                           |               |
| DMRNW_015094625.1:104401 | NW_015094625.1 | 104401 | 105900 | 1500 | 3 | 5.40E-13 | 77  | 5.133 | nyap2;LOC106914288        |               |
| DMRNW_015094625.1:287201 | NW_015094625.1 | 287201 | 290500 | 3300 | 2 | 1.55E-11 | 134 | 4.061 | tsen34;LOC106914306       | Transcription |
| DMRNW_015094625.1:293101 | NW_015094625.1 | 293101 | 294500 | 1400 | 1 | 5.98E-08 | 63  | 4.5   | elf2a                     | Transcription |
| DMRNW_015094625.1:382401 | NW_015094625.1 | 382401 | 383300 | 900  | 1 | 1.56E-09 | 24  | 2.667 | rncepl1                   | Metabolism    |
| DMRNW_015094625.1:386601 | NW_015094625.1 | 386601 | 387900 | 1300 | 2 | 8.11E-11 | 33  | 2.538 | rncepl1                   | Metabolism    |
| DMRNW_015094625.1:456701 | NW_015094625.1 | 456701 | 459000 | 2300 | 2 | 2.15E-30 | 58  | 2.522 | LOC106914324              |               |
| DMRNW_015094626.1:37701  | NW_015094626.1 | 37701  | 38200  | 500  | 2 | 1.99E-10 | 46  | 9.2   | LOC106914335              |               |
| DMRNW_015094627.1:141001 | NW_015094627.1 | 141001 | 141300 | 300  | 1 | 5.28E-08 | 20  | 6.667 | crk                       |               |
| DMRNW_015094630.1:94001  | NW_015094630.1 | 94001  | 94400  | 400  | 2 | 9.08E-12 | 4   | 1     | atxn1                     | Transcription |
| DMRNW_015094631.1:190801 | NW_015094631.1 | 190801 | 192500 | 1700 | 1 | 3.21E-08 | 19  | 1.118 | ttl1                      | Cytoskeleton  |
| DMRNW_015094631.1:482501 | NW_015094631.1 | 482501 | 486200 | 3700 | 1 | 2.08E-10 | 124 | 3.351 | anks1b                    | Receptor      |
| DMRNW_015094632.1:131101 | NW_015094632.1 | 131101 | 132500 | 1400 | 1 | 1.01E-09 | 73  | 5.214 | LOC106914507              |               |
| DMRNW_015094632.1:361001 | NW_015094632.1 | 361001 | 361600 | 600  | 2 | 7.53E-10 | 35  | 5.833 | hivep2                    | Transcription |
| DMRNW_015094632.1:365001 | NW_015094632.1 | 365001 | 366800 | 1800 | 1 | 1.28E-09 | 65  | 3.611 | hivep2                    | Transcription |
| DMRNW_015094632.1:414201 | NW_015094632.1 | 414201 | 416300 | 2100 | 5 | 6.09E-16 | 72  | 3.429 | hivep2                    | Transcription |
| DMRNW_015094633.1:197301 | NW_015094633.1 | 197301 | 198600 | 1300 | 1 | 6.13E-11 | 42  | 3.231 | LOC106914544              |               |
| DMRNW_015094633.1:315801 | NW_015094633.1 | 315801 | 318900 | 3100 | 1 | 3.89E-08 | 171 | 5.516 | LOC106914544              |               |
| DMRNW_015094636.1:250101 | NW_015094636.1 | 250101 | 250300 | 200  | 1 | 2.88E-08 | 5   | 2.5   |                           |               |
| DMRNW_015094637.1:36201  | NW_015094637.1 | 36201  | 37200  | 1000 | 2 | 1.55E-14 | 60  | 6     | LOC106914654              |               |

|                          |                |        |        |      |   |          |     |       |                           |               |
|--------------------------|----------------|--------|--------|------|---|----------|-----|-------|---------------------------|---------------|
| DMRNW_015094638.1:370901 | NW_015094638.1 | 370901 | 372500 | 1600 | 1 | 3.27E-10 | 19  | 1.188 | hdac8                     | Epigenetic    |
| DMRNW_015094638.1:417501 | NW_015094638.1 | 417501 | 420600 | 3100 | 1 | 2.47E-09 | 36  | 1.161 | rps4x                     | Transcription |
| DMRNW_015094640.1:298101 | NW_015094640.1 | 298101 | 299200 | 1100 | 1 | 8.52E-08 | 21  | 1.909 | anks1a                    | Unknown       |
| DMRNW_015094641.1:48601  | NW_015094641.1 | 48601  | 50100  | 1500 | 3 | 4.79E-13 | 41  | 2.733 |                           |               |
| DMRNW_015094642.1:351401 | NW_015094642.1 | 351401 | 352300 | 900  | 1 | 2.32E-08 | 19  | 2.111 |                           |               |
| DMRNW_015094642.1:388601 | NW_015094642.1 | 388601 | 389300 | 700  | 1 | 6.30E-08 | 21  | 3     | LOC106914771              |               |
| DMRNW_015094642.1:537101 | NW_015094642.1 | 537101 | 539700 | 2600 | 1 | 1.78E-08 | 120 | 4.615 | eps15l1                   | Signaling     |
| DMRNW_015094644.1:7001   | NW_015094644.1 | 7001   | 7500   | 500  | 1 | 2.42E-09 | 12  | 2.4   |                           |               |
| DMRNW_015094648.1:519801 | NW_015094648.1 | 519801 | 520200 | 400  | 2 | 2.72E-09 | 3   | 0.75  |                           |               |
| DMRNW_015094649.1:273501 | NW_015094649.1 | 273501 | 275900 | 2400 | 1 | 4.98E-09 | 68  | 2.833 | LOC106914927              |               |
| DMRNW_015094651.1:440501 | NW_015094651.1 | 440501 | 441400 | 900  | 2 | 6.05E-08 | 9   | 1     | adgra2                    |               |
| DMRNW_015094653.1:73201  | NW_015094653.1 | 73201  | 75100  | 1900 | 3 | 6.07E-22 | 81  | 4.263 | nfib;LOC106915036         | Transcription |
| DMRNW_015094659.1:119101 | NW_015094659.1 | 119101 | 119600 | 500  | 2 | 6.46E-16 | 7   | 1.4   | dock1                     | Signaling     |
| DMRNW_015094660.1:354401 | NW_015094660.1 | 354401 | 357200 | 2800 | 1 | 7.40E-09 | 78  | 2.786 | zeb1                      | Transcription |
| DMRNW_015094660.1:410301 | NW_015094660.1 | 410301 | 410700 | 400  | 2 | 3.37E-11 | 8   | 2     | LOC106915194;znf438       | Transcription |
| DMRNW_015094661.1:140401 | NW_015094661.1 | 140401 | 146800 | 6400 | 2 | 1.58E-10 | 138 | 2.156 |                           |               |
| DMRNW_015094664.1:215001 | NW_015094664.1 | 215001 | 217200 | 2200 | 1 | 3.03E-08 | 27  | 1.227 |                           |               |
| DMRNW_015094668.1:108301 | NW_015094668.1 | 108301 | 110800 | 2500 | 6 | 5.87E-10 | 82  | 3.28  | LOC106915388              |               |
| DMRNW_015094671.1:145601 | NW_015094671.1 | 145601 | 146200 | 600  | 1 | 9.29E-10 | 13  | 2.167 |                           |               |
| DMRNW_015094673.1:230401 | NW_015094673.1 | 230401 | 231800 | 1400 | 1 | 2.64E-09 | 26  | 1.857 | LOC106915471              |               |
| DMRNW_015094678.1:13501  | NW_015094678.1 | 13501  | 15400  | 1900 | 1 | 3.12E-08 | 38  | 2     | rabgap1                   | Signaling     |
| DMRNW_015094679.1:376501 | NW_015094679.1 | 376501 | 377800 | 1300 | 2 | 6.49E-13 | 21  | 1.615 |                           |               |
| DMRNW_015094680.1:387601 | NW_015094680.1 | 387601 | 388400 | 800  | 4 | 2.36E-15 | 31  | 3.875 | ncmap                     | Transcription |
| DMRNW_015094680.1:394201 | NW_015094680.1 | 394201 | 394500 | 300  | 1 | 3.12E-09 | 3   | 1     | ncmap                     |               |
| DMRNW_015094681.1:158201 | NW_015094681.1 | 158201 | 160000 | 1800 | 2 | 2.57E-08 | 43  | 2.389 | LOC106915699              |               |
| DMRNW_015094682.1:309301 | NW_015094682.1 | 309301 | 312200 | 2900 | 1 | 1.23E-09 | 86  | 2.966 | pdk3                      | Signaling     |
| DMRNW_015094683.1:244101 | NW_015094683.1 | 244101 | 244600 | 500  | 1 | 3.04E-08 | 6   | 1.2   | stk36                     |               |
| DMRNW_015094689.1:43301  | NW_015094689.1 | 43301  | 45800  | 2500 | 2 | 9.79E-17 | 89  | 3.56  | nat10                     | Metabolism    |
| DMRNW_015094689.1:49801  | NW_015094689.1 | 49801  | 54800  | 5000 | 1 | 2.98E-08 | 113 | 2.26  | nat10                     | Metabolism    |
| DMRNW_015094689.1:397201 | NW_015094689.1 | 397201 | 398400 | 1200 | 1 | 3.76E-17 | 10  | 0.833 |                           |               |
| DMRNW_015094690.1:254601 | NW_015094690.1 | 254601 | 255300 | 700  | 1 | 5.66E-08 | 43  | 6.143 | LOC106915865              |               |
| DMRNW_015094691.1:57701  | NW_015094691.1 | 57701  | 62900  | 5200 | 1 | 2.92E-11 | 74  | 1.423 |                           |               |
| DMRNW_015094691.1:245001 | NW_015094691.1 | 245001 | 248500 | 3500 | 1 | 3.96E-08 | 77  | 2.2   | LOC106915887              |               |
| DMRNW_015094692.1:195901 | NW_015094692.1 | 195901 | 196600 | 700  | 3 | 3.90E-13 | 10  | 1.429 | ufm1                      | Proteolysis   |
| DMRNW_015094692.1:377601 | NW_015094692.1 | 377601 | 378100 | 500  | 2 | 1.44E-14 | 5   | 1     |                           |               |
| DMRNW_015094693.1:697901 | NW_015094693.1 | 697901 | 698600 | 700  | 1 | 3.74E-09 | 28  | 4     |                           |               |
| DMRNW_015094694.1:134101 | NW_015094694.1 | 134101 | 134400 | 300  | 2 | 7.82E-12 | 7   | 2.333 | rreb1                     | Signaling     |
| DMRNW_015094694.1:147601 | NW_015094694.1 | 147601 | 148100 | 500  | 1 | 1.14E-09 | 22  | 4.4   | rreb1                     | Signaling     |
| DMRNW_015094694.1:224301 | NW_015094694.1 | 224301 | 224700 | 400  | 1 | 1.62E-11 | 6   | 1.5   | LOC106916021;LOC106916023 |               |
| DMRNW_015094694.1:444101 | NW_015094694.1 | 444101 | 445100 | 1000 | 1 | 3.95E-08 | 30  | 3     | LOC106916029              |               |
| DMRNW_015094696.1:84901  | NW_015094696.1 | 84901  | 86900  | 2000 | 2 | 4.72E-14 | 61  | 3.05  |                           |               |
| DMRNW_015094696.1:167901 | NW_015094696.1 | 167901 | 168200 | 300  | 1 | 2.78E-08 | 9   | 3     | itpr2                     | Receptor      |
| DMRNW_015094696.1:323401 | NW_015094696.1 | 323401 | 324700 | 1300 | 2 | 1.17E-10 | 42  | 3.231 |                           |               |
| DMRNW_015094696.1:334101 | NW_015094696.1 | 334101 | 336900 | 2800 | 9 | 3.46E-33 | 103 | 3.679 |                           |               |
| DMRNW_015094696.1:339901 | NW_015094696.1 | 339901 | 341500 | 1600 | 4 | 6.11E-28 | 47  | 2.938 |                           |               |
| DMRNW_015094698.1:395701 | NW_015094698.1 | 395701 | 398900 | 3200 | 2 | 9.58E-16 | 84  | 2.625 | LOC106916111              |               |
| DMRNW_015094699.1:230201 | NW_015094699.1 | 230201 | 233800 | 3600 | 1 | 1.36E-08 | 126 | 3.5   | LOC106916119              |               |
| DMRNW_015094699.1:416401 | NW_015094699.1 | 416401 | 417700 | 1300 | 3 | 2.46E-08 | 38  | 2.923 | LOC106916141;LOC106916151 |               |
| DMRNW_015094700.1:136501 | NW_015094700.1 | 136501 | 137900 | 1400 | 1 | 1.41E-08 | 33  | 2.357 | LOC106916163              |               |
| DMRNW_015094701.1:244901 | NW_015094701.1 | 244901 | 247200 | 2300 | 1 | 1.16E-08 | 64  | 2.783 | LOC106916178              |               |
| DMRNW_015094702.1:284901 | NW_015094702.1 | 284901 | 285700 | 800  | 3 | 3.39E-12 | 36  | 4.5   | LOC106916198              |               |
| DMRNW_015094703.1:24301  | NW_015094703.1 | 24301  | 24600  | 300  | 1 | 2.39E-09 | 2   | 0.667 |                           |               |
| DMRNW_015094706.1:40901  | NW_015094706.1 | 40901  | 42700  | 1800 | 1 | 4.77E-10 | 34  | 1.889 | LOC106916262              |               |
| DMRNW_015094707.1:21901  | NW_015094707.1 | 21901  | 23000  | 1100 | 2 | 1.23E-08 | 18  | 1.636 | hibch                     | Metabolism    |
| DMRNW_015094707.1:191901 | NW_015094707.1 | 191901 | 197100 | 5200 | 1 | 4.30E-11 | 159 | 3.058 | LOC106916310              |               |
| DMRNW_015094707.1:214901 | NW_015094707.1 | 214901 | 215300 | 400  | 1 | 3.66E-09 | 44  | 11    | LOC106916310              |               |
| DMRNW_015094707.1:300001 | NW_015094707.1 | 300001 | 300400 | 400  | 2 | 1.57E-09 | 36  | 9     | LOC106916310              |               |
| DMRNW_015094707.1:361201 | NW_015094707.1 | 361201 | 364700 | 3500 | 1 | 3.23E-08 | 143 | 4.086 |                           |               |
| DMRNW_015094708.1:386101 | NW_015094708.1 | 386101 | 387100 | 1000 | 2 | 6.02E-13 | 22  | 2.2   | LOC106916335              |               |
| DMRNW_015094710.1:449201 | NW_015094710.1 | 449201 | 452800 | 3600 | 2 | 3.55E-12 | 68  | 1.889 | LOC106916371              |               |
| DMRNW_015094713.1:712701 | NW_015094713.1 | 712701 | 714300 | 1600 | 1 | 9.13E-09 | 52  | 3.25  | zfang4                    |               |
| DMRNW_015094714.1:413201 | NW_015094714.1 | 413201 | 414700 | 1500 | 1 | 1.95E-11 | 42  | 2.8   |                           |               |
| DMRNW_015094714.1:417901 | NW_015094714.1 | 417901 | 420500 | 2600 | 6 | 1.41E-35 | 84  | 3.231 |                           |               |
| DMRNW_015094718.1:128201 | NW_015094718.1 | 128201 | 131300 | 3100 | 1 | 5.48E-08 | 109 | 3.516 | LOC106916550              |               |
| DMRNW_015094718.1:364401 | NW_015094718.1 | 364401 | 368500 | 4100 | 7 | 1.72E-23 | 100 | 2.439 | LOC106916565;LOC106916567 |               |
| DMRNW_015094721.1:298701 | NW_015094721.1 | 298701 | 299700 | 1000 | 1 | 2.63E-08 | 31  | 3.1   | LOC106916610              |               |
| DMRNW_015094721.1:557701 | NW_015094721.1 | 557701 | 558800 | 1100 | 1 | 1.65E-08 | 76  | 6.909 | fbln1                     | Cytoskeleton  |
| DMRNW_015094721.1:626701 | NW_015094721.1 | 626701 | 631500 | 4800 | 5 | 4.63E-19 | 198 | 4.125 | LOC106916624              |               |
| DMRNW_015094722.1:535601 | NW_015094722.1 | 535601 | 537800 | 2200 | 1 | 1.51E-09 | 14  | 0.636 |                           |               |
| DMRNW_015094725.1:72101  | NW_015094725.1 | 72101  | 72400  | 300  | 1 | 1.66E-13 | 18  | 6     |                           |               |
| DMRNW_015094725.1:187501 | NW_015094725.1 | 187501 | 189700 | 2200 | 3 | 4.44E-10 | 42  | 1.909 | jade2                     |               |
| DMRNW_015094728.1:277401 | NW_015094728.1 | 277401 | 278000 | 600  | 1 | 1.90E-09 | 20  | 3.333 | fto;LOC106916748          |               |
| DMRNW_015094729.1:174001 | NW_015094729.1 | 174001 | 175700 | 1700 | 1 | 1.04E-08 | 19  | 1.118 | LOC106916751              |               |

|                          |                |        |        |      |   |          |     |       |                      |                      |
|--------------------------|----------------|--------|--------|------|---|----------|-----|-------|----------------------|----------------------|
| DMRNW_015094730.1:423601 | NW_015094730.1 | 423601 | 425700 | 2100 | 1 | 2.35E-09 | 25  | 1.19  | LOC106916782         |                      |
| DMRNW_015094731.1:232301 | NW_015094731.1 | 232301 | 232700 | 400  | 1 | 3.06E-08 | 5   | 1.25  | LOC106916787         |                      |
| DMRNW_015094732.1:124001 | NW_015094732.1 | 124001 | 126600 | 2600 | 4 | 1.27E-16 | 51  | 1.962 |                      |                      |
| DMRNW_015094732.1:442501 | NW_015094732.1 | 442501 | 443700 | 1200 | 1 | 1.90E-09 | 55  | 4.583 | LOC106916795         |                      |
| DMRNW_015094732.1:608001 | NW_015094732.1 | 608001 | 612200 | 4200 | 2 | 1.84E-09 | 84  | 2     | LOC106916795         |                      |
| DMRNW_015094734.1:195301 | NW_015094734.1 | 195301 | 198900 | 3600 | 4 | 8.24E-16 | 90  | 2.5   |                      |                      |
| DMRNW_015094740.1:341301 | NW_015094740.1 | 341301 | 342800 | 1500 | 1 | 3.57E-08 | 156 | 10.4  | gltscr1              |                      |
| DMRNW_015094745.1:398501 | NW_015094745.1 | 398501 | 400400 | 1900 | 2 | 1.56E-08 | 44  | 2.316 | LOC106917079         |                      |
| DMRNW_015094746.1:19201  | NW_015094746.1 | 19201  | 22600  | 3400 | 1 | 2.22E-16 | 135 | 3.971 | eps8                 | Signaling            |
| DMRNW_015094746.1:67501  | NW_015094746.1 | 67501  | 68100  | 600  | 1 | 7.46E-08 | 35  | 5.833 | dupsp16              | Signaling            |
| DMRNW_015094746.1:115201 | NW_015094746.1 | 115201 | 117100 | 1900 | 1 | 3.60E-16 | 114 | 6     | lrp6                 | Receptor             |
| DMRNW_015094746.1:219201 | NW_015094746.1 | 219201 | 220800 | 1600 | 1 | 7.65E-30 | 61  | 3.812 |                      |                      |
| DMRNW_015094746.1:236601 | NW_015094746.1 | 236601 | 240600 | 4000 | 2 | 6.21E-10 | 92  | 2.3   |                      |                      |
| DMRNW_015094746.1:295501 | NW_015094746.1 | 295501 | 298000 | 2500 | 3 | 3.55E-09 | 113 | 4.52  | LOC106917099         |                      |
| DMRNW_015094746.1:373001 | NW_015094746.1 | 373001 | 373200 | 200  | 1 | 5.40E-10 | 0   | 0     | sfbmt2               | Transcription        |
| DMRNW_015094748.1:236301 | NW_015094748.1 | 236301 | 238700 | 2400 | 1 | 1.35E-08 | 38  | 1.583 | elfn1                | Receptor             |
| DMRNW_015094752.1:15001  | NW_015094752.1 | 15001  | 20900  | 5900 | 2 | 1.77E-15 | 123 | 2.085 | LOC106917195         |                      |
| DMRNW_015094755.1:613401 | NW_015094755.1 | 613401 | 614000 | 600  | 3 | 3.00E-13 | 39  | 6.5   | rce1                 | Proteolysis          |
| DMRNW_015094757.1:432301 | NW_015094757.1 | 432301 | 433500 | 1200 | 1 | 5.31E-10 | 18  | 1.5   |                      |                      |
| DMRNW_015094761.1:185601 | NW_015094761.1 | 185601 | 186900 | 1300 | 1 | 2.75E-10 | 28  | 2.154 | LOC106917362         |                      |
| DMRNW_015094761.1:316401 | NW_015094761.1 | 316401 | 316900 | 500  | 3 | 3.07E-21 | 12  | 2.4   |                      |                      |
| DMRNW_015094764.1:23501  | NW_015094764.1 | 23501  | 24100  | 600  | 2 | 2.69E-11 | 21  | 3.5   | astn2;trim32         | Unknown              |
| DMRNW_015094765.1:423101 | NW_015094765.1 | 423101 | 423300 | 200  | 1 | 1.35E-08 | 1   | 0.5   | LOC106917460         |                      |
| DMRNW_015094765.1:454801 | NW_015094765.1 | 454801 | 456300 | 1500 | 1 | 5.47E-08 | 37  | 2.467 | LOC106917467         |                      |
| DMRNW_015094766.1:422501 | NW_015094766.1 | 422501 | 423100 | 600  | 1 | 7.43E-13 | 14  | 2.333 |                      |                      |
| DMRNW_015094766.1:441201 | NW_015094766.1 | 441201 | 441600 | 400  | 1 | 4.52E-08 | 0   | 0     |                      |                      |
| DMRNW_015094766.1:447901 | NW_015094766.1 | 447901 | 448300 | 400  | 1 | 3.98E-09 | 13  | 3.25  |                      |                      |
| DMRNW_015094768.1:473901 | NW_015094768.1 | 473901 | 477100 | 3200 | 4 | 1.38E-12 | 86  | 2.688 | LOC106917548         |                      |
| DMRNW_015094769.1:322501 | NW_015094769.1 | 322501 | 323900 | 1400 | 2 | 1.05E-10 | 34  | 2.429 |                      |                      |
| DMRNW_015094770.1:320501 | NW_015094770.1 | 320501 | 322400 | 1900 | 1 | 1.25E-08 | 98  | 5.158 | rin1                 | Signaling            |
| DMRNW_015094770.1:351501 | NW_015094770.1 | 351501 | 352100 | 600  | 1 | 7.46E-09 | 25  | 4.167 | b4gat1               |                      |
| DMRNW_015094773.1:429601 | NW_015094773.1 | 429601 | 429900 | 300  | 1 | 7.62E-10 | 11  | 3.667 |                      |                      |
| DMRNW_015094776.1:101401 | NW_015094776.1 | 101401 | 102200 | 800  | 1 | 2.65E-09 | 10  | 1.25  | LOC106917737         |                      |
| DMRNW_015094777.1:164001 | NW_015094777.1 | 164001 | 164500 | 500  | 1 | 9.41E-10 | 13  | 2.6   |                      |                      |
| DMRNW_015094777.1:292601 | NW_015094777.1 | 292601 | 295100 | 2500 | 1 | 3.95E-08 | 57  | 2.28  | ddr2                 | Transcription        |
| DMRNW_015094778.1:397301 | NW_015094778.1 | 397301 | 400700 | 3400 | 4 | 3.11E-09 | 59  | 1.735 |                      |                      |
| DMRNW_015094780.1:347701 | NW_015094780.1 | 347701 | 348200 | 500  | 1 | 6.53E-08 | 9   | 1.8   | kif26a               | Cytoskeleton         |
| DMRNW_015094781.1:130601 | NW_015094781.1 | 130601 | 130900 | 300  | 1 | 7.01E-13 | 0   | 0     |                      |                      |
| DMRNW_015094783.1:69101  | NW_015094783.1 | 69101  | 70600  | 1500 | 1 | 5.54E-08 | 28  | 1.867 | adamts14             | Proteolysis          |
| DMRNW_015094784.1:240101 | NW_015094784.1 | 240101 | 240400 | 300  | 1 | 4.15E-08 | 8   | 2.667 | LOC106917909         |                      |
| DMRNW_015094788.1:90501  | NW_015094788.1 | 90501  | 94900  | 4400 | 1 | 2.83E-12 | 63  | 1.432 | LOC106917980         |                      |
| DMRNW_015094790.1:16701  | NW_015094790.1 | 16701  | 17100  | 400  | 1 | 4.48E-09 | 4   | 1     | dync2h1;LOC106918005 | Cytoskeleton         |
| DMRNW_015094793.1:208701 | NW_015094793.1 | 208701 | 209900 | 1200 | 1 | 6.60E-08 | 40  | 3.333 | LOC106918050         |                      |
| DMRNW_015094794.1:219101 | NW_015094794.1 | 219101 | 220700 | 1600 | 1 | 5.30E-09 | 34  | 2.125 |                      |                      |
| DMRNW_015094795.1:361901 | NW_015094795.1 | 361901 | 365000 | 3100 | 1 | 3.86E-09 | 62  | 2     |                      |                      |
| DMRNW_015094798.1:103701 | NW_015094798.1 | 103701 | 107000 | 3300 | 4 | 7.93E-11 | 120 | 3.636 | arpp21               |                      |
| DMRNW_015094799.1:110201 | NW_015094799.1 | 110201 | 111700 | 1500 | 1 | 8.61E-08 | 44  | 2.933 | LOC106918176         |                      |
| DMRNW_015094799.1:342101 | NW_015094799.1 | 342101 | 343300 | 1200 | 1 | 4.26E-09 | 33  | 2.75  | LOC106918189         |                      |
| DMRNW_015094800.1:171601 | NW_015094800.1 | 171601 | 172600 | 1000 | 1 | 3.02E-09 | 20  | 2     | LOC106918212         |                      |
| DMRNW_015094802.1:271401 | NW_015094802.1 | 271401 | 272300 | 900  | 1 | 9.64E-09 | 40  | 4.444 |                      |                      |
| DMRNW_015094804.1:196101 | NW_015094804.1 | 196101 | 198400 | 2300 | 1 | 1.78E-15 | 64  | 2.783 | pkdcc                |                      |
| DMRNW_015094805.1:165301 | NW_015094805.1 | 165301 | 166300 | 1000 | 2 | 1.77E-20 | 8   | 0.8   | LOC106918276         |                      |
| DMRNW_015094807.1:76201  | NW_015094807.1 | 76201  | 77000  | 800  | 2 | 1.45E-10 | 15  | 1.875 |                      |                      |
| DMRNW_015094810.1:81901  | NW_015094810.1 | 81901  | 82400  | 500  | 1 | 5.46E-12 | 7   | 1.4   |                      |                      |
| DMRNW_015094818.1:72701  | NW_015094818.1 | 72701  | 75000  | 2300 | 1 | 6.93E-09 | 72  | 3.13  | rhm15                | Transcription        |
| DMRNW_015094822.1:167501 | NW_015094822.1 | 167501 | 168800 | 1300 | 1 | 9.41E-11 | 48  | 3.692 | LOC106918631         |                      |
| DMRNW_015094827.1:208101 | NW_015094827.1 | 208101 | 210600 | 2500 | 1 | 6.28E-08 | 32  | 1.28  | LOC106918711         |                      |
| DMRNW_015094827.1:386201 | NW_015094827.1 | 386201 | 389200 | 3000 | 4 | 3.55E-19 | 82  | 2.733 | wdr11                |                      |
| DMRNW_015094829.1:82501  | NW_015094829.1 | 82501  | 82800  | 300  | 1 | 2.70E-13 | 12  | 4     | LOC106918736         |                      |
| DMRNW_015094829.1:383101 | NW_015094829.1 | 383101 | 384100 | 1000 | 5 | 9.77E-20 | 48  | 4.8   |                      |                      |
| DMRNW_015094834.1:359401 | NW_015094834.1 | 359401 | 361500 | 2100 | 2 | 1.42E-08 | 122 | 5.81  | LOC106918835         |                      |
| DMRNW_015094835.1:1501   | NW_015094835.1 | 1501   | 1700   | 200  | 1 | 1.35E-09 | 9   | 4.5   |                      |                      |
| DMRNW_015094835.1:74701  | NW_015094835.1 | 74701  | 77400  | 2700 | 1 | 2.94E-08 | 94  | 3.481 | LOC106918845         |                      |
| DMRNW_015094835.1:80701  | NW_015094835.1 | 80701  | 82900  | 2200 | 1 | 4.06E-11 | 64  | 2.909 | LOC106918845         |                      |
| DMRNW_015094835.1:96701  | NW_015094835.1 | 96701  | 97300  | 600  | 3 | 1.33E-13 | 15  | 2.5   | mlycd                |                      |
| DMRNW_015094835.1:334301 | NW_015094835.1 | 334301 | 334700 | 400  | 1 | 2.13E-11 | 11  | 2.75  | cdh13                | Extracellular Matrix |
| DMRNW_015094837.1:145201 | NW_015094837.1 | 145201 | 145800 | 600  | 1 | 1.32E-11 | 22  | 3.667 |                      |                      |
| DMRNW_015094838.1:232901 | NW_015094838.1 | 232901 | 234800 | 1900 | 1 | 1.27E-10 | 36  | 1.895 | fgf14                |                      |
| DMRNW_015094838.1:419801 | NW_015094838.1 | 419801 | 420600 | 800  | 1 | 7.63E-09 | 31  | 3.875 |                      |                      |
| DMRNW_015094838.1:520601 | NW_015094838.1 | 520601 | 521100 | 500  | 1 | 7.13E-09 | 19  | 3.8   | LOC106918891         |                      |
| DMRNW_015094840.1:147901 | NW_015094840.1 | 147901 | 150900 | 3000 | 1 | 5.67E-17 | 73  | 2.433 | LOC106918932         |                      |
| DMRNW_015094841.1:72501  | NW_015094841.1 | 72501  | 73800  | 1300 | 1 | 1.63E-08 | 52  | 4     | srrm3;LOC106918937   |                      |
| DMRNW_015094841.1:526001 | NW_015094841.1 | 526001 | 529300 | 3300 | 1 | 1.28E-08 | 80  | 2.424 |                      |                      |

|                          |                |        |        |      |    |          |     |       |                                        |                      |
|--------------------------|----------------|--------|--------|------|----|----------|-----|-------|----------------------------------------|----------------------|
| DMRNW_015094842.1:27001  | NW_015094842.1 | 27001  | 28500  | 1500 | 1  | 1.90E-08 | 43  | 2.867 | LOC106918959                           |                      |
| DMRNW_015094842.1:152901 | NW_015094842.1 | 152901 | 156400 | 3500 | 1  | 3.02E-08 | 104 | 2.971 | rhbdf2                                 | Protease             |
| DMRNW_015094845.1:353301 | NW_015094845.1 | 353301 | 353800 | 500  | 1  | 9.72E-08 | 9   | 1.8   |                                        |                      |
| DMRNW_015094851.1:196701 | NW_015094851.1 | 196701 | 197900 | 1200 | 1  | 1.77E-08 | 52  | 4.333 | cdh8                                   | Extracellular Matrix |
| DMRNW_015094853.1:241201 | NW_015094853.1 | 241201 | 245400 | 4200 | 1  | 1.91E-08 | 202 | 4.81  | polr2a                                 | Transcription        |
| DMRNW_015094854.1:139301 | NW_015094854.1 | 139301 | 140500 | 1200 | 1  | 6.51E-10 | 23  | 1.917 |                                        |                      |
| DMRNW_015094856.1:265001 | NW_015094856.1 | 265001 | 266600 | 1600 | 1  | 7.54E-08 | 54  | 3.375 | LOC106919167;LOC106919175              |                      |
| DMRNW_015094857.1:3601   | NW_015094857.1 | 3601   | 6100   | 2500 | 11 | 2.20E-39 | 32  | 1.28  | LOC106919185;LOC106919182              |                      |
| DMRNW_015094858.1:8301   | NW_015094858.1 | 8301   | 8700   | 400  | 3  | 8.73E-12 | 2   | 0.5   |                                        |                      |
| DMRNW_015094859.1:210801 | NW_015094859.1 | 210801 | 213300 | 2500 | 1  | 5.18E-08 | 54  | 2.16  | LOC106919238                           |                      |
| DMRNW_015094861.1:310601 | NW_015094861.1 | 310601 | 313100 | 2500 | 1  | 5.09E-09 | 41  | 1.64  |                                        |                      |
| DMRNW_015094863.1:126701 | NW_015094863.1 | 126701 | 131300 | 4600 | 5  | 1.46E-14 | 149 | 3.239 | LOC106919291                           |                      |
| DMRNW_015094864.1:138801 | NW_015094864.1 | 138801 | 143100 | 4300 | 1  | 9.52E-10 | 86  | 2     | LOC106919347                           |                      |
| DMRNW_015094864.1:358701 | NW_015094864.1 | 358701 | 360900 | 2200 | 1  | 1.53E-09 | 43  | 1.955 | tjp1;LOC106919354                      | Extracellular Matrix |
| DMRNW_015094869.1:731501 | NW_015094869.1 | 731501 | 735300 | 3800 | 1  | 2.16E-13 | 83  | 2.184 | LOC106919415                           |                      |
| DMRNW_015094869.1:770201 | NW_015094869.1 | 770201 | 770700 | 500  | 2  | 2.17E-11 | 26  | 5.2   | tsnare1                                | Transport            |
| DMRNW_015094872.1:70301  | NW_015094872.1 | 70301  | 71800  | 1500 | 2  | 6.41E-09 | 64  | 4.267 | nlg3                                   | Signaling            |
| DMRNW_015094874.1:70901  | NW_015094874.1 | 70901  | 72100  | 1200 | 1  | 7.33E-08 | 66  | 5.5   | LOC106919484                           |                      |
| DMRNW_015094879.1:172601 | NW_015094879.1 | 172601 | 173600 | 1000 | 1  | 3.88E-11 | 22  | 2.2   | LOC106919572                           |                      |
| DMRNW_015094879.1:315001 | NW_015094879.1 | 315001 | 315900 | 900  | 2  | 2.81E-09 | 21  | 2.333 | LOC106919581                           |                      |
| DMRNW_015094879.1:351701 | NW_015094879.1 | 351701 | 352300 | 600  | 1  | 7.98E-08 | 40  | 6.667 | nhej1;LOC106919594                     |                      |
| DMRNW_015094881.1:265101 | NW_015094881.1 | 265101 | 268700 | 3600 | 3  | 9.77E-12 | 104 | 2.889 | LOC106919638                           |                      |
| DMRNW_015094883.1:154701 | NW_015094883.1 | 154701 | 155400 | 700  | 1  | 4.99E-10 | 23  | 3.286 |                                        |                      |
| DMRNW_015094884.1:327701 | NW_015094884.1 | 327701 | 328600 | 900  | 1  | 9.94E-09 | 39  | 4.333 | scg3;LOC106919704                      | Unknown              |
| DMRNW_015094885.1:280201 | NW_015094885.1 | 280201 | 280400 | 200  | 1  | 2.24E-09 | 6   | 3     | myo10                                  | Cytoskeleton         |
| DMRNW_015094886.1:66401  | NW_015094886.1 | 66401  | 67300  | 900  | 1  | 2.93E-08 | 55  | 6.111 |                                        |                      |
| DMRNW_015094886.1:194901 | NW_015094886.1 | 194901 | 196100 | 1200 | 1  | 3.39E-09 | 8   | 0.667 | LOC106919734                           |                      |
| DMRNW_015094886.1:274801 | NW_015094886.1 | 274801 | 275200 | 400  | 1  | 8.05E-08 | 13  | 3.25  | LOC106919734                           |                      |
| DMRNW_015094892.1:61301  | NW_015094892.1 | 61301  | 62100  | 800  | 2  | 1.76E-08 | 28  | 3.5   | apbb2                                  | Receptor             |
| DMRNW_015094893.1:81601  | NW_015094893.1 | 81601  | 82700  | 1100 | 1  | 1.34E-08 | 7   | 0.636 |                                        |                      |
| DMRNW_015094893.1:90001  | NW_015094893.1 | 90001  | 91300  | 1300 | 1  | 9.74E-08 | 12  | 0.923 |                                        |                      |
| DMRNW_015094893.1:380101 | NW_015094893.1 | 380101 | 380700 | 600  | 2  | 2.90E-10 | 20  | 3.333 | ntsr1                                  |                      |
| DMRNW_015094893.1:385701 | NW_015094893.1 | 385701 | 387200 | 1500 | 4  | 1.23E-12 | 83  | 5.533 | ntsr1                                  |                      |
| DMRNW_015094894.1:431401 | NW_015094894.1 | 431401 | 432300 | 900  | 1  | 5.76E-10 | 20  | 2.222 | LOC106919834                           |                      |
| DMRNW_015094894.1:474601 | NW_015094894.1 | 474601 | 475800 | 1200 | 1  | 2.08E-08 | 39  | 3.25  | gpr143;LOC106919849                    |                      |
| DMRNW_015094895.1:211601 | NW_015094895.1 | 211601 | 214100 | 2500 | 1  | 8.60E-11 | 79  | 3.16  |                                        |                      |
| DMRNW_015094899.1:330801 | NW_015094899.1 | 330801 | 331100 | 300  | 1  | 8.88E-19 | 24  | 8     | LOC106919911                           |                      |
| DMRNW_015094905.1:565901 | NW_015094905.1 | 565901 | 567800 | 1900 | 1  | 4.80E-12 | 29  | 1.526 | opr1                                   | Receptor             |
| DMRNW_015094906.1:218201 | NW_015094906.1 | 218201 | 219100 | 900  | 1  | 1.19E-08 | 28  | 3.111 | LOC106920004                           |                      |
| DMRNW_015094910.1:601    | NW_015094910.1 | 601    | 1800   | 1200 | 2  | 3.82E-10 | 13  | 1.083 |                                        |                      |
| DMRNW_015094911.1:297401 | NW_015094911.1 | 297401 | 299800 | 2400 | 1  | 6.32E-09 | 53  | 2.208 | LOC106920097                           |                      |
| DMRNW_015094912.1:104701 | NW_015094912.1 | 104701 | 105600 | 900  | 5  | 4.41E-16 | 17  | 1.889 | LOC106920123                           |                      |
| DMRNW_015094915.1:72301  | NW_015094915.1 | 72301  | 73300  | 1000 | 1  | 4.59E-09 | 10  | 1     | LOC106920151                           |                      |
| DMRNW_015094917.1:1      | NW_015094917.1 | 1      | 1000   | 1000 | 2  | 4.22E-09 | 27  | 2.7   |                                        |                      |
| DMRNW_015094917.1:198001 | NW_015094917.1 | 198001 | 199700 | 1700 | 1  | 7.59E-09 | 67  | 3.941 |                                        |                      |
| DMRNW_015094919.1:203601 | NW_015094919.1 | 203601 | 207900 | 4300 | 10 | 9.43E-22 | 132 | 3.07  | LOC106920198                           |                      |
| DMRNW_015094934.1:126101 | NW_015094934.1 | 126101 | 128000 | 1900 | 5  | 4.02E-15 | 51  | 2.684 |                                        |                      |
| DMRNW_015094934.1:356901 | NW_015094934.1 | 356901 | 358500 | 1600 | 1  | 1.01E-08 | 41  | 2.562 |                                        |                      |
| DMRNW_015094938.1:180301 | NW_015094938.1 | 180301 | 184900 | 4600 | 9  | 2.44E-18 | 184 | 4     | LOC106920532;LOC106920533;LOC106920531 |                      |
| DMRNW_015094945.1:280201 | NW_015094945.1 | 280201 | 280900 | 700  | 1  | 5.69E-09 | 26  | 3.714 |                                        |                      |
| DMRNW_015094946.1:113201 | NW_015094946.1 | 113201 | 113700 | 500  | 1  | 5.08E-08 | 9   | 1.8   | LOC106920636                           |                      |
| DMRNW_015094947.1:61201  | NW_015094947.1 | 61201  | 62300  | 1100 | 3  | 5.79E-09 | 60  | 5.455 |                                        |                      |
| DMRNW_015094949.1:23001  | NW_015094949.1 | 23001  | 24200  | 1200 | 2  | 4.25E-10 | 40  | 3.333 |                                        |                      |
| DMRNW_015094949.1:421501 | NW_015094949.1 | 421501 | 423400 | 1900 | 3  | 7.94E-12 | 43  | 2.263 | lin28b                                 | Transcription        |
| DMRNW_015094949.1:950201 | NW_015094949.1 | 950201 | 951300 | 1100 | 1  | 6.12E-09 | 53  | 4.818 |                                        |                      |
| DMRNW_015094949.1:956701 | NW_015094949.1 | 956701 | 957800 | 1100 | 2  | 2.99E-09 | 44  | 4     |                                        |                      |
| DMRNW_015094951.1:148901 | NW_015094951.1 | 148901 | 150000 | 1100 | 1  | 5.56E-08 | 7   | 0.636 |                                        |                      |
| DMRNW_015094953.1:437401 | NW_015094953.1 | 437401 | 439100 | 1700 | 1  | 3.22E-09 | 57  | 3.353 | s1c25a21                               | Binding Protein      |
| DMRNW_015094955.1:98501  | NW_015094955.1 | 98501  | 99900  | 1400 | 4  | 8.85E-17 | 74  | 5.286 | arhgap21                               |                      |
| DMRNW_015094959.1:142701 | NW_015094959.1 | 142701 | 144800 | 2100 | 7  | 2.44E-37 | 41  | 1.952 | trps1                                  | Development          |
| DMRNW_015094960.1:220401 | NW_015094960.1 | 220401 | 221700 | 1300 | 2  | 1.03E-09 | 23  | 1.769 |                                        |                      |
| DMRNW_015094962.1:363501 | NW_015094962.1 | 363501 | 365600 | 2100 | 2  | 4.25E-10 | 46  | 2.19  | LOC106920876                           |                      |
| DMRNW_015094964.1:78001  | NW_015094964.1 | 78001  | 81200  | 3200 | 2  | 1.95E-12 | 87  | 2.719 |                                        |                      |
| DMRNW_015094964.1:137801 | NW_015094964.1 | 137801 | 140500 | 2700 | 2  | 1.58E-16 | 100 | 3.704 | LOC106920897                           |                      |
| DMRNW_015094968.1:87501  | NW_015094968.1 | 87501  | 88900  | 1400 | 1  | 2.95E-12 | 23  | 1.643 | LOC106920963                           |                      |
| DMRNW_015094968.1:92501  | NW_015094968.1 | 92501  | 93300  | 800  | 2  | 4.99E-23 | 15  | 1.875 | LOC106920963                           |                      |
| DMRNW_015094975.1:164201 | NW_015094975.1 | 164201 | 165800 | 1600 | 1  | 4.46E-08 | 42  | 2.625 | dtx1                                   | Signaling            |
| DMRNW_015094976.1:342801 | NW_015094976.1 | 342801 | 344200 | 1400 | 1  | 1.47E-08 | 33  | 2.357 |                                        |                      |
| DMRNW_015094978.1:83601  | NW_015094978.1 | 83601  | 84200  | 600  | 1  | 8.73E-08 | 20  | 3.333 | LOC106921110                           |                      |
| DMRNW_015094979.1:211501 | NW_015094979.1 | 211501 | 212000 | 500  | 3  | 4.05E-18 | 5   | 1     | ahnak2                                 |                      |
| DMRNW_015094979.1:214201 | NW_015094979.1 | 214201 | 217300 | 3100 | 1  | 9.92E-08 | 67  | 2.161 | ahnak2                                 |                      |
| DMRNW_015094980.1:315001 | NW_015094980.1 | 315001 | 316900 | 1900 | 3  | 6.49E-11 | 61  | 3.211 | LOC106921143                           |                      |

|                          |                |        |        |      |    |          |     |       |                           |                            |
|--------------------------|----------------|--------|--------|------|----|----------|-----|-------|---------------------------|----------------------------|
| DMRNW_015094981.1:404301 | NW_015094981.1 | 404301 | 404800 | 500  | 2  | 5.67E-13 | 3   | 0.6   |                           |                            |
| DMRNW_015094983.1:345401 | NW_015094983.1 | 345401 | 345700 | 300  | 1  | 2.39E-10 | 4   | 1.333 | ak4                       |                            |
| DMRNW_015094985.1:177701 | NW_015094985.1 | 177701 | 180000 | 2300 | 2  | 1.90E-09 | 67  | 2.913 |                           |                            |
| DMRNW_015094986.1:195801 | NW_015094986.1 | 195801 | 197200 | 1400 | 2  | 1.04E-11 | 38  | 2.714 | LOC106921238              |                            |
| DMRNW_015094990.1:210101 | NW_015094990.1 | 210101 | 211000 | 900  | 3  | 4.07E-12 | 42  | 4.667 | LOC106921329              |                            |
| DMRNW_015094994.1:97801  | NW_015094994.1 | 97801  | 98200  | 4000 | 1  | 3.73E-10 | 26  | 6.5   | LOC106921412              |                            |
| DMRNW_015094994.1:161201 | NW_015094994.1 | 161201 | 161300 | 100  | 1  | 5.28E-09 | 2   | 2     |                           |                            |
| DMRNW_015094997.1:185601 | NW_015094997.1 | 185601 | 187300 | 1700 | 2  | 3.10E-11 | 33  | 1.941 |                           |                            |
| DMRNW_015094998.1:230201 | NW_015094998.1 | 230201 | 231300 | 1100 | 1  | 8.21E-09 | 51  | 4.636 | sptbn4                    | Cytoskeleton               |
| DMRNW_015094999.1:297901 | NW_015094999.1 | 297901 | 300200 | 2300 | 1  | 7.44E-08 | 40  | 1.739 |                           |                            |
| DMRNW_015095003.1:72801  | NW_015095003.1 | 72801  | 75700  | 2900 | 2  | 2.33E-12 | 68  | 2.345 | LOC106921526              |                            |
| DMRNW_015095003.1:331801 | NW_015095003.1 | 331801 | 332300 | 500  | 2  | 9.63E-09 | 20  | 4     |                           |                            |
| DMRNW_015095007.1:31501  | NW_015095007.1 | 31501  | 31700  | 200  | 2  | 1.01E-10 | 3   | 1.5   | unc13b                    |                            |
| DMRNW_015095012.1:26501  | NW_015095012.1 | 26501  | 28000  | 1500 | 1  | 2.94E-18 | 38  | 2.533 | syne3                     |                            |
| DMRNW_015095013.1:187201 | NW_015095013.1 | 187201 | 189100 | 1900 | 4  | 7.57E-18 | 17  | 0.895 |                           |                            |
| DMRNW_015095013.1:194001 | NW_015095013.1 | 194001 | 200100 | 6100 | 18 | 1.98E-21 | 142 | 2.328 |                           |                            |
| DMRNW_015095017.1:88601  | NW_015095017.1 | 88601  | 89400  | 800  | 1  | 5.81E-12 | 28  | 3.5   | ctbp2                     | Transcription              |
| DMRNW_015095020.1:49301  | NW_015095020.1 | 49301  | 53200  | 3900 | 2  | 2.33E-12 | 118 | 3.026 | LOC106921764              |                            |
| DMRNW_015095020.1:141601 | NW_015095020.1 | 141601 | 143100 | 1500 | 3  | 7.15E-13 | 43  | 2.867 |                           |                            |
| DMRNW_015095024.1:305901 | NW_015095024.1 | 305901 | 311900 | 6000 | 2  | 1.12E-12 | 169 | 2.817 |                           |                            |
| DMRNW_015095028.1:326801 | NW_015095028.1 | 326801 | 328900 | 2100 | 1  | 7.25E-08 | 52  | 2.476 |                           |                            |
| DMRNW_015095030.1:119401 | NW_015095030.1 | 119401 | 119700 | 300  | 1  | 2.69E-08 | 6   | 2     | LOC106921873              |                            |
| DMRNW_015095030.1:159801 | NW_015095030.1 | 159801 | 160300 | 500  | 2  | 2.05E-09 | 18  | 3.6   | LOC106921873              |                            |
| DMRNW_015095030.1:252801 | NW_015095030.1 | 252801 | 253500 | 700  | 2  | 5.77E-10 | 13  | 1.857 | LOC106921874              |                            |
| DMRNW_015095034.1:102001 | NW_015095034.1 | 102001 | 103800 | 1800 | 2  | 4.41E-12 | 28  | 1.556 | LOC106921924              |                            |
| DMRNW_015095036.1:2901   | NW_015095036.1 | 2901   | 4800   | 1900 | 13 | 7.39E-25 | 56  | 2.947 |                           |                            |
| DMRNW_015095037.1:286601 | NW_015095037.1 | 286601 | 287800 | 1200 | 1  | 3.25E-08 | 21  | 1.75  | actr6;fuk                 | Cytoskeleton               |
| DMRNW_015095038.1:197901 | NW_015095038.1 | 197901 | 199400 | 1500 | 6  | 1.86E-16 | 48  | 3.2   |                           |                            |
| DMRNW_015095039.1:193101 | NW_015095039.1 | 193101 | 193900 | 800  | 2  | 7.86E-10 | 17  | 2.125 | calb2                     | Signaling                  |
| DMRNW_015095040.1:162901 | NW_015095040.1 | 162901 | 165200 | 2300 | 1  | 2.72E-11 | 26  | 1.13  | cdyl2                     | Metabolism                 |
| DMRNW_015095040.1:298401 | NW_015095040.1 | 298401 | 302200 | 3800 | 1  | 7.15E-09 | 103 | 2.711 | LOC106921999              |                            |
| DMRNW_015095041.1:199101 | NW_015095041.1 | 199101 | 199500 | 400  | 1  | 3.68E-08 | 17  | 4.25  | kiaa0907                  |                            |
| DMRNW_015095042.1:216801 | NW_015095042.1 | 216801 | 219500 | 2700 | 1  | 4.22E-08 | 95  | 3.519 | LOC106922040              |                            |
| DMRNW_015095042.1:565801 | NW_015095042.1 | 565801 | 570300 | 4500 | 6  | 1.60E-14 | 60  | 1.333 | LOC106922060              |                            |
| DMRNW_015095051.1:70301  | NW_015095051.1 | 70301  | 72700  | 2400 | 1  | 6.49E-08 | 71  | 2.958 | mtrn2                     | Signaling                  |
| DMRNW_015095051.1:284601 | NW_015095051.1 | 284601 | 289500 | 4900 | 8  | 2.34E-21 | 128 | 2.612 | nyap1                     |                            |
| DMRNW_015095051.1:294101 | NW_015095051.1 | 294101 | 298200 | 4100 | 5  | 1.58E-44 | 94  | 2.293 | nyap1;LOC106922191        |                            |
| DMRNW_015095053.1:378201 | NW_015095053.1 | 378201 | 379600 | 1400 | 4  | 5.81E-12 | 72  | 5.143 | dclk1                     |                            |
| DMRNW_015095054.1:206601 | NW_015095054.1 | 206601 | 210100 | 3500 | 1  | 8.20E-15 | 33  | 0.943 | LOC106922241;sema3a       | Growth Factors & Cytokines |
| DMRNW_015095057.1:602401 | NW_015095057.1 | 602401 | 603300 | 900  | 2  | 7.53E-12 | 36  | 4     | LOC106922328              |                            |
| DMRNW_015095063.1:418801 | NW_015095063.1 | 418801 | 419400 | 600  | 2  | 6.42E-12 | 21  | 3.5   | LOC106922374              |                            |
| DMRNW_015095064.1:40701  | NW_015095064.1 | 40701  | 41600  | 900  | 1  | 2.12E-08 | 21  | 2.333 | sema6b                    | Signaling                  |
| DMRNW_015095066.1:4701   | NW_015095066.1 | 4701   | 6000   | 1300 | 1  | 8.06E-10 | 27  | 2.077 |                           |                            |
| DMRNW_015095069.1:91201  | NW_015095069.1 | 91201  | 94100  | 2900 | 1  | 1.04E-08 | 111 | 3.828 | LOC106922441              |                            |
| DMRNW_015095071.1:571401 | NW_015095071.1 | 571401 | 572300 | 900  | 2  | 2.68E-10 | 23  | 2.556 |                           |                            |
| DMRNW_015095074.1:265501 | NW_015095074.1 | 265501 | 266400 | 900  | 2  | 4.46E-25 | 27  | 3     | dnah9                     | Cytoskeleton               |
| DMRNW_015095075.1:173801 | NW_015095075.1 | 173801 | 174400 | 600  | 2  | 5.85E-16 | 2   | 0.333 | cdh22                     | Extracellular Matrix       |
| DMRNW_015095076.1:269301 | NW_015095076.1 | 269301 | 271300 | 2000 | 1  | 4.31E-08 | 50  | 2.5   |                           |                            |
| DMRNW_015095081.1:127601 | NW_015095081.1 | 127601 | 129300 | 1700 | 1  | 1.70E-08 | 67  | 3.941 | cdc14a                    | Cell Cycle                 |
| DMRNW_015095088.1:56601  | NW_015095088.1 | 56601  | 57800  | 1200 | 1  | 7.59E-08 | 35  | 2.917 | tspan8                    | Cytoskeleton               |
| DMRNW_015095088.1:74301  | NW_015095088.1 | 74301  | 80100  | 5800 | 4  | 1.02E-21 | 171 | 2.948 | LOC106922696              |                            |
| DMRNW_015095088.1:165101 | NW_015095088.1 | 165101 | 166800 | 1700 | 1  | 2.31E-10 | 87  | 5.118 | srgap1                    | Signaling                  |
| DMRNW_015095088.1:282201 | NW_015095088.1 | 282201 | 286100 | 3900 | 1  | 7.25E-10 | 138 | 3.538 | LOC106922715              |                            |
| DMRNW_015095095.1:197501 | NW_015095095.1 | 197501 | 197900 | 400  | 1  | 1.71E-08 | 16  | 4     | actn4                     | Cytoskeleton               |
| DMRNW_015095095.1:216901 | NW_015095095.1 | 216901 | 218200 | 1300 | 1  | 9.57E-08 | 68  | 5.231 | actn4                     | Cytoskeleton               |
| DMRNW_015095099.1:135301 | NW_015095099.1 | 135301 | 139000 | 3700 | 1  | 4.88E-08 | 169 | 4.568 | igfbp7;LOC106922884       | Unknown                    |
| DMRNW_015095101.1:259501 | NW_015095101.1 | 259501 | 260500 | 1000 | 2  | 7.06E-12 | 14  | 1.4   |                           |                            |
| DMRNW_015095104.1:152501 | NW_015095104.1 | 152501 | 153400 | 900  | 1  | 4.42E-08 | 59  | 6.556 |                           |                            |
| DMRNW_015095104.1:156501 | NW_015095104.1 | 156501 | 157300 | 800  | 1  | 1.81E-14 | 34  | 4.25  |                           |                            |
| DMRNW_015095109.1:136001 | NW_015095109.1 | 136001 | 136200 | 200  | 1  | 1.83E-09 | 9   | 4.5   | LOC106923073;LOC106923074 |                            |
| DMRNW_015095109.1:153601 | NW_015095109.1 | 153601 | 154100 | 500  | 1  | 2.76E-10 | 4   | 0.8   | LOC106923075              |                            |
| DMRNW_015095109.1:186901 | NW_015095109.1 | 186901 | 187300 | 400  | 1  | 7.26E-09 | 18  | 4.5   | LOC106923075;LOC106923078 |                            |
| DMRNW_015095113.1:8301   | NW_015095113.1 | 8301   | 10400  | 2100 | 1  | 1.32E-09 | 40  | 1.905 | LOC106923127              |                            |
| DMRNW_015095114.1:216701 | NW_015095114.1 | 216701 | 218100 | 1400 | 4  | 1.97E-14 | 50  | 3.571 |                           |                            |
| DMRNW_015095115.1:212801 | NW_015095115.1 | 212801 | 217300 | 4500 | 4  | 5.29E-11 | 157 | 3.489 |                           |                            |
| DMRNW_015095116.1:467101 | NW_015095116.1 | 467101 | 467500 | 400  | 1  | 4.37E-08 | 27  | 6.75  |                           |                            |
| DMRNW_015095119.1:196001 | NW_015095119.1 | 196001 | 201100 | 5100 | 1  | 4.04E-09 | 143 | 2.804 | LOC106923239              |                            |
| DMRNW_015095121.1:302701 | NW_015095121.1 | 302701 | 304200 | 1500 | 2  | 4.00E-10 | 37  | 2.467 | LOC106923270              |                            |
| DMRNW_015095123.1:98301  | NW_015095123.1 | 98301  | 99600  | 1300 | 1  | 8.43E-08 | 43  | 3.308 |                           |                            |
| DMRNW_015095128.1:147401 | NW_015095128.1 | 147401 | 149400 | 2000 | 4  | 2.28E-19 | 35  | 1.75  |                           |                            |
| DMRNW_015095137.1:76701  | NW_015095137.1 | 76701  | 77100  | 400  | 1  | 5.86E-09 | 14  | 3.5   | gfra3                     |                            |
| DMRNW_015095142.1:237101 | NW_015095142.1 | 237101 | 237400 | 300  | 1  | 6.99E-14 | 11  | 3.667 |                           |                            |
| DMRNW_015095145.1:51401  | NW_015095145.1 | 51401  | 52700  | 1300 | 2  | 2.75E-10 | 20  | 1.538 | vipr2                     | Receptor                   |

|                          |                |        |        |      |   |          |     |       |                           |               |
|--------------------------|----------------|--------|--------|------|---|----------|-----|-------|---------------------------|---------------|
| DMRNW_015095145.1:72701  | NW_015095145.1 | 72701  | 74400  | 1700 | 1 | 2.36E-08 | 29  | 1.706 | vipr2                     | Receptor      |
| DMRNW_015095146.1:294301 | NW_015095146.1 | 294301 | 295300 | 1000 | 1 | 8.77E-09 | 33  | 3.3   |                           |               |
| DMRNW_015095147.1:286301 | NW_015095147.1 | 286301 | 287600 | 1300 | 1 | 5.57E-12 | 42  | 3.231 | arap2                     | Signaling     |
| DMRNW_015095148.1:148401 | NW_015095148.1 | 148401 | 149600 | 1200 | 1 | 5.31E-12 | 13  | 1.083 | LOC106923619              |               |
| DMRNW_015095149.1:41201  | NW_015095149.1 | 41201  | 42900  | 1700 | 2 | 1.04E-08 | 14  | 0.824 | LOC106923648              |               |
| DMRNW_015095149.1:46301  | NW_015095149.1 | 46301  | 49300  | 3000 | 4 | 5.37E-10 | 57  | 1.9   | LOC106923648              |               |
| DMRNW_015095149.1:284501 | NW_015095149.1 | 284501 | 285800 | 1300 | 1 | 6.27E-08 | 46  | 3.538 |                           |               |
| DMRNW_015095150.1:7601   | NW_015095150.1 | 7601   | 10000  | 2400 | 1 | 1.03E-10 | 65  | 2.708 | LOC106923650              |               |
| DMRNW_015095153.1:165301 | NW_015095153.1 | 165301 | 167600 | 2300 | 1 | 5.33E-12 | 89  | 3.87  | LOC106923708              |               |
| DMRNW_015095156.1:71801  | NW_015095156.1 | 71801  | 72800  | 1000 | 1 | 1.39E-12 | 19  | 1.9   | LOC106923754              |               |
| DMRNW_015095161.1:234801 | NW_015095161.1 | 234801 | 236100 | 1300 | 1 | 9.92E-08 | 45  | 3.462 |                           |               |
| DMRNW_015095165.1:280501 | NW_015095165.1 | 280501 | 281000 | 500  | 1 | 7.58E-08 | 17  | 3.4   |                           |               |
| DMRNW_015095167.1:131301 | NW_015095167.1 | 131301 | 132000 | 700  | 3 | 1.55E-38 | 8   | 1.143 |                           |               |
| DMRNW_015095169.1:86801  | NW_015095169.1 | 86801  | 88300  | 1500 | 1 | 1.31E-08 | 48  | 3.2   | LOC106923872              |               |
| DMRNW_015095173.1:275801 | NW_015095173.1 | 275801 | 276300 | 500  | 2 | 2.18E-08 | 33  | 6.6   | LOC106923922              |               |
| DMRNW_015095174.1:73801  | NW_015095174.1 | 73801  | 75100  | 1300 | 1 | 2.82E-08 | 62  | 4.769 | LOC106923942              |               |
| DMRNW_015095174.1:163001 | NW_015095174.1 | 163001 | 164200 | 1200 | 1 | 6.30E-08 | 39  | 3.25  | kiaa1109                  |               |
| DMRNW_015095177.1:9301   | NW_015095177.1 | 9301   | 11900  | 2600 | 3 | 7.40E-11 | 88  | 3.385 |                           |               |
| DMRNW_015095180.1:222301 | NW_015095180.1 | 222301 | 224900 | 2600 | 4 | 5.48E-84 | 89  | 3.423 | LOC106924056              |               |
| DMRNW_015095187.1:208701 | NW_015095187.1 | 208701 | 210500 | 1800 | 1 | 2.32E-09 | 32  | 1.778 | phf10                     | Transcription |
| DMRNW_015095188.1:119401 | NW_015095188.1 | 119401 | 122700 | 3300 | 1 | 5.98E-11 | 167 | 5.061 | kifap3                    | Cytoskeleton  |
| DMRNW_015095188.1:160701 | NW_015095188.1 | 160701 | 162100 | 1400 | 1 | 2.81E-08 | 35  | 2.5   | trmt1l                    |               |
| DMRNW_015095188.1:172401 | NW_015095188.1 | 172401 | 173400 | 1000 | 4 | 4.86E-24 | 63  | 6.3   | prpf38a                   |               |
| DMRNW_015095188.1:269601 | NW_015095188.1 | 269601 | 269900 | 300  | 1 | 7.41E-08 | 20  | 6.667 | LOC106924175              |               |
| DMRNW_015095189.1:332201 | NW_015095189.1 | 332201 | 335100 | 2900 | 1 | 2.54E-10 | 35  | 1.207 |                           |               |
| DMRNW_015095196.1:282501 | NW_015095196.1 | 282501 | 284000 | 1500 | 2 | 2.44E-10 | 77  | 5.133 |                           |               |
| DMRNW_015095197.1:124301 | NW_015095197.1 | 124301 | 126300 | 2000 | 3 | 6.82E-09 | 64  | 3.2   | celsr2                    | Cytoskeleton  |
| DMRNW_015095198.1:20501  | NW_015095198.1 | 20501  | 21700  | 1200 | 6 | 2.79E-22 | 41  | 3.417 | unc119                    | Receptor      |
| DMRNW_015095200.1:36001  | NW_015095200.1 | 36001  | 37600  | 1600 | 1 | 2.42E-09 | 47  | 2.938 |                           |               |
| DMRNW_015095201.1:89801  | NW_015095201.1 | 89801  | 90800  | 1000 | 1 | 2.10E-08 | 41  | 4.1   | ibtk                      |               |
| DMRNW_015095202.1:14101  | NW_015095202.1 | 14101  | 15100  | 1000 | 2 | 2.33E-09 | 32  | 3.2   |                           |               |
| DMRNW_015095203.1:251201 | NW_015095203.1 | 251201 | 252600 | 1400 | 2 | 4.78E-08 | 17  | 1.214 | prkd1                     | Signaling     |
| DMRNW_015095208.1:69201  | NW_015095208.1 | 69201  | 69800  | 600  | 1 | 4.46E-10 | 11  | 1.833 |                           |               |
| DMRNW_015095209.1:9701   | NW_015095209.1 | 9701   | 10000  | 300  | 3 | 8.36E-29 | 8   | 2.667 | LOC106924447              |               |
| DMRNW_015095213.1:166301 | NW_015095213.1 | 166301 | 168000 | 1700 | 1 | 1.75E-08 | 30  | 1.765 | gcnt1                     | Golgi         |
| DMRNW_015095213.1:392101 | NW_015095213.1 | 392101 | 392900 | 800  | 4 | 1.29E-12 | 22  | 2.75  |                           |               |
| DMRNW_015095213.1:397601 | NW_015095213.1 | 397601 | 399700 | 2100 | 1 | 1.97E-08 | 35  | 1.667 |                           |               |
| DMRNW_015095216.1:283001 | NW_015095216.1 | 283001 | 284000 | 1000 | 3 | 2.21E-14 | 1   | 0.1   | LOC106924570              |               |
| DMRNW_015095218.1:73501  | NW_015095218.1 | 73501  | 75600  | 2100 | 1 | 1.80E-09 | 73  | 3.476 |                           |               |
| DMRNW_015095218.1:88901  | NW_015095218.1 | 88901  | 92000  | 3100 | 1 | 1.13E-08 | 83  | 2.877 |                           |               |
| DMRNW_015095220.1:136001 | NW_015095220.1 | 136001 | 142200 | 6200 | 1 | 2.25E-08 | 187 | 3.016 | LOC106924627              |               |
| DMRNW_015095224.1:283201 | NW_015095224.1 | 283201 | 284600 | 1400 | 2 | 3.23E-17 | 42  | 3     | csmd3                     |               |
| DMRNW_015095227.1:89501  | NW_015095227.1 | 89501  | 92300  | 2800 | 5 | 2.90E-16 | 96  | 3.429 | pacs2                     |               |
| DMRNW_015095229.1:183401 | NW_015095229.1 | 183401 | 189500 | 6100 | 2 | 1.38E-08 | 287 | 4.705 | LOC106924783;LOC106924784 |               |
| DMRNW_015095231.1:9301   | NW_015095231.1 | 9301   | 10300  | 1000 | 1 | 4.28E-12 | 27  | 2.7   | LOC106924804              |               |
| DMRNW_015095231.1:13101  | NW_015095231.1 | 13101  | 15000  | 1900 | 2 | 9.77E-10 | 31  | 1.632 | LOC106924804              |               |
| DMRNW_015095241.1:264801 | NW_015095241.1 | 264801 | 265400 | 600  | 1 | 4.32E-08 | 25  | 4.167 |                           |               |
| DMRNW_015095244.1:162701 | NW_015095244.1 | 162701 | 164300 | 1600 | 1 | 1.85E-08 | 103 | 6.438 | prps2                     |               |
| DMRNW_015095244.1:243601 | NW_015095244.1 | 243601 | 245100 | 1500 | 4 | 1.29E-11 | 44  | 2.933 | LOC106924959              |               |
| DMRNW_015095245.1:31801  | NW_015095245.1 | 31801  | 32400  | 600  | 1 | 5.28E-09 | 7   | 1.167 | LOC106924982              |               |
| DMRNW_015095248.1:237601 | NW_015095248.1 | 237601 | 240100 | 2500 | 2 | 2.69E-09 | 79  | 3.16  |                           |               |
| DMRNW_015095249.1:149201 | NW_015095249.1 | 149201 | 149400 | 200  | 1 | 3.48E-13 | 19  | 9.5   | trhde                     | Signaling     |
| DMRNW_015095249.1:168801 | NW_015095249.1 | 168801 | 172600 | 3800 | 2 | 1.93E-09 | 80  | 2.105 | trhde                     | Signaling     |
| DMRNW_015095249.1:208701 | NW_015095249.1 | 208701 | 209800 | 1100 | 1 | 6.51E-08 | 44  | 4     | trhde                     | Signaling     |
| DMRNW_015095257.1:225601 | NW_015095257.1 | 225601 | 226700 | 1100 | 1 | 4.92E-09 | 12  | 1.091 |                           |               |
| DMRNW_015095259.1:74601  | NW_015095259.1 | 74601  | 76500  | 1900 | 1 | 3.45E-08 | 54  | 2.842 | ncan                      |               |
| DMRNW_015095260.1:4401   | NW_015095260.1 | 4401   | 7000   | 2600 | 1 | 2.15E-08 | 42  | 1.615 |                           |               |
| DMRNW_015095260.1:177501 | NW_015095260.1 | 177501 | 179200 | 1700 | 1 | 2.75E-11 | 23  | 1.353 |                           |               |
| DMRNW_015095262.1:191101 | NW_015095262.1 | 191101 | 192100 | 1000 | 2 | 6.58E-08 | 30  | 3     | myo9a                     | Cytoskeleton  |
| DMRNW_015095265.1:222101 | NW_015095265.1 | 222101 | 224000 | 1900 | 1 | 3.09E-11 | 55  | 2.895 |                           |               |
| DMRNW_015095267.1:216601 | NW_015095267.1 | 216601 | 218900 | 2300 | 1 | 1.56E-09 | 34  | 1.478 | erc2                      | Cytoskeleton  |
| DMRNW_015095273.1:123501 | NW_015095273.1 | 123501 | 124400 | 900  | 1 | 2.94E-08 | 52  | 5.778 | LOC106925301              |               |
| DMRNW_015095278.1:105701 | NW_015095278.1 | 105701 | 109400 | 3700 | 1 | 6.51E-08 | 257 | 6.946 | LOC106925351              |               |
| DMRNW_015095281.1:234201 | NW_015095281.1 | 234201 | 236500 | 2300 | 2 | 2.55E-08 | 56  | 2.435 | ttyh1                     | Transport     |
| DMRNW_015095284.1:192401 | NW_015095284.1 | 192401 | 193100 | 700  | 2 | 9.33E-19 | 15  | 2.143 | LOC106925436              |               |
| DMRNW_015095284.1:196101 | NW_015095284.1 | 196101 | 196400 | 300  | 2 | 5.29E-16 | 0   | 0     | LOC106925436              |               |
| DMRNW_015095287.1:142101 | NW_015095287.1 | 142101 | 143300 | 1200 | 1 | 5.49E-09 | 48  | 4     | LOC106925467              |               |
| DMRNW_015095293.1:76001  | NW_015095293.1 | 76001  | 82200  | 6200 | 3 | 6.60E-11 | 104 | 1.677 |                           |               |
| DMRNW_015095294.1:108901 | NW_015095294.1 | 108901 | 109900 | 1000 | 1 | 1.31E-29 | 65  | 6.5   | taf1c                     |               |
| DMRNW_015095294.1:143001 | NW_015095294.1 | 143001 | 147000 | 4000 | 1 | 2.61E-08 | 115 | 2.875 | LOC106925541              |               |
| DMRNW_015095294.1:183601 | NW_015095294.1 | 183601 | 185200 | 1600 | 3 | 1.62E-19 | 41  | 2.562 | LOC106925544              |               |
| DMRNW_015095294.1:218301 | NW_015095294.1 | 218301 | 218700 | 400  | 1 | 2.53E-09 | 32  | 8     | LOC106925544              |               |
| DMRNW_015095298.1:226201 | NW_015095298.1 | 226201 | 226700 | 500  | 3 | 3.28E-15 | 3   | 0.6   | LOC106925584              |               |

|                          |                |        |        |      |   |          |     |       |                           |                      |
|--------------------------|----------------|--------|--------|------|---|----------|-----|-------|---------------------------|----------------------|
| DMRNW_015095299.1:45501  | NW_015095299.1 | 45501  | 47400  | 1900 | 1 | 5.67E-08 | 75  | 3.947 | sest1                     | Signaling            |
| DMRNW_015095300.1:146401 | NW_015095300.1 | 146401 | 148000 | 1600 | 4 | 2.43E-11 | 36  | 2.25  | dpy19l3                   | Development          |
| DMRNW_015095308.1:13701  | NW_015095308.1 | 13701  | 14100  | 400  | 1 | 8.62E-09 | 25  | 6.25  | srx29;LOC106925731        | Cytoskeleton         |
| DMRNW_015095308.1:111101 | NW_015095308.1 | 111101 | 114800 | 3700 | 1 | 1.02E-08 | 124 | 3.351 | maff                      |                      |
| DMRNW_015095308.1:120301 | NW_015095308.1 | 120301 | 122400 | 2100 | 2 | 3.68E-09 | 102 | 4.857 | LOC106925735              |                      |
| DMRNW_015095309.1:91901  | NW_015095309.1 | 91901  | 93000  | 1100 | 3 | 5.09E-13 | 21  | 1.909 | LOC106925759              |                      |
| DMRNW_015095311.1:144801 | NW_015095311.1 | 144801 | 147500 | 2700 | 1 | 3.86E-08 | 52  | 1.926 | LOC106925778              |                      |
| DMRNW_015095313.1:16101  | NW_015095313.1 | 16101  | 19400  | 3300 | 5 | 9.30E-11 | 97  | 2.939 | LOC106925788              |                      |
| DMRNW_015095318.1:176901 | NW_015095318.1 | 176901 | 181800 | 4900 | 3 | 9.52E-10 | 164 | 3.347 | sema5b                    |                      |
| DMRNW_015095318.1:192101 | NW_015095318.1 | 192101 | 194500 | 2400 | 1 | 6.97E-09 | 95  | 3.958 | sema5b                    |                      |
| DMRNW_015095320.1:1201   | NW_015095320.1 | 1201   | 4300   | 3100 | 1 | 9.09E-14 | 71  | 2.29  |                           |                      |
| DMRNW_015095325.1:16301  | NW_015095325.1 | 16301  | 17200  | 900  | 1 | 8.11E-08 | 22  | 2.444 |                           |                      |
| DMRNW_015095326.1:174501 | NW_015095326.1 | 174501 | 184400 | 9900 | 7 | 1.86E-16 | 230 | 2.323 |                           |                      |
| DMRNW_015095327.1:325001 | NW_015095327.1 | 325001 | 325700 | 700  | 3 | 1.30E-09 | 41  | 5.857 | LOC106925983              |                      |
| DMRNW_015095331.1:401    | NW_015095331.1 | 401    | 900    | 500  | 1 | 2.48E-08 | 14  | 2.8   |                           |                      |
| DMRNW_015095339.1:253701 | NW_015095339.1 | 253701 | 254383 | 683  | 1 | 1.94E-08 | 33  | 4.832 |                           |                      |
| DMRNW_015095340.1:206201 | NW_015095340.1 | 206201 | 206500 | 300  | 1 | 9.84E-10 | 1   | 0.333 | dgki                      | Signaling            |
| DMRNW_015095344.1:143301 | NW_015095344.1 | 143301 | 144600 | 1300 | 1 | 6.13E-09 | 47  | 3.615 | LOC106926176              |                      |
| DMRNW_015095353.1:192701 | NW_015095353.1 | 192701 | 194500 | 1800 | 1 | 8.86E-08 | 35  | 1.944 | ttll10                    |                      |
| DMRNW_015095356.1:111301 | NW_015095356.1 | 111301 | 112400 | 1100 | 4 | 2.29E-14 | 39  | 3.545 |                           |                      |
| DMRNW_015095356.1:117101 | NW_015095356.1 | 117101 | 119500 | 2400 | 2 | 3.47E-15 | 56  | 2.333 | LOC106926305              |                      |
| DMRNW_015095358.1:204801 | NW_015095358.1 | 204801 | 206000 | 1200 | 1 | 2.61E-09 | 29  | 2.417 | frmpd3                    |                      |
| DMRNW_015095361.1:110701 | NW_015095361.1 | 110701 | 114300 | 3600 | 1 | 1.37E-08 | 71  | 1.972 | LOC106926353              |                      |
| DMRNW_015095367.1:390801 | NW_015095367.1 | 390801 | 392749 | 1949 | 4 | 1.72E-17 | 37  | 1.898 |                           |                      |
| DMRNW_015095372.1:86401  | NW_015095372.1 | 86401  | 87800  | 1400 | 1 | 2.27E-08 | 119 | 8.5   | LOC106926456              |                      |
| DMRNW_015095375.1:1      | NW_015095375.1 | 1      | 400    | 400  | 2 | 8.48E-18 | 9   | 2.25  |                           |                      |
| DMRNW_015095375.1:171401 | NW_015095375.1 | 171401 | 172200 | 800  | 5 | 1.39E-13 | 24  | 3     |                           |                      |
| DMRNW_015095378.1:239001 | NW_015095378.1 | 239001 | 240500 | 1500 | 1 | 4.21E-10 | 46  | 3.067 | ccm2l                     |                      |
| DMRNW_015095382.1:183901 | NW_015095382.1 | 183901 | 185200 | 1300 | 1 | 1.41E-09 | 48  | 3.692 |                           |                      |
| DMRNW_015095383.1:234301 | NW_015095383.1 | 234301 | 237000 | 2700 | 1 | 1.74E-09 | 75  | 2.778 |                           |                      |
| DMRNW_015095386.1:37201  | NW_015095386.1 | 37201  | 38300  | 1100 | 1 | 4.25E-09 | 30  | 2.727 | arnt2                     | Transcription        |
| DMRNW_015095388.1:141001 | NW_015095388.1 | 141001 | 144300 | 3300 | 1 | 5.62E-10 | 121 | 3.667 | unc5d                     | Receptor             |
| DMRNW_015095393.1:141601 | NW_015095393.1 | 141601 | 142800 | 1200 | 1 | 3.72E-11 | 49  | 4.083 | LOC106926703              |                      |
| DMRNW_015095394.1:225601 | NW_015095394.1 | 225601 | 225800 | 200  | 1 | 8.93E-09 | 5   | 2.5   |                           |                      |
| DMRNW_015095396.1:336301 | NW_015095396.1 | 336301 | 337200 | 900  | 3 | 5.71E-09 | 47  | 5.222 | barhl1                    | Transcription        |
| DMRNW_015095397.1:32101  | NW_015095397.1 | 32101  | 33800  | 1700 | 2 | 1.35E-09 | 94  | 5.529 | LOC106926739;LOC106926738 |                      |
| DMRNW_015095405.1:104301 | NW_015095405.1 | 104301 | 107200 | 2900 | 2 | 3.41E-10 | 51  | 1.759 | reln                      | Protease             |
| DMRNW_015095406.1:44201  | NW_015095406.1 | 44201  | 44600  | 400  | 2 | 1.74E-10 | 2   | 0.5   |                           |                      |
| DMRNW_015095407.1:299001 | NW_015095407.1 | 299001 | 299600 | 600  | 1 | 1.68E-08 | 23  | 3.833 | znf804a                   |                      |
| DMRNW_015095413.1:10101  | NW_015095413.1 | 10101  | 13000  | 2900 | 1 | 6.83E-08 | 46  | 1.586 |                           |                      |
| DMRNW_015095413.1:238201 | NW_015095413.1 | 238201 | 239000 | 800  | 1 | 1.17E-13 | 15  | 1.875 |                           |                      |
| DMRNW_015095416.1:63901  | NW_015095416.1 | 63901  | 64800  | 900  | 2 | 1.95E-10 | 17  | 1.889 | cwc27                     | Metabolism           |
| DMRNW_015095416.1:175801 | NW_015095416.1 | 175801 | 177100 | 1300 | 1 | 2.86E-13 | 33  | 2.538 | plac8                     |                      |
| DMRNW_015095416.1:224101 | NW_015095416.1 | 224101 | 224600 | 500  | 1 | 2.21E-08 | 17  | 3.4   | sec31a                    | Transport            |
| DMRNW_015095420.1:168901 | NW_015095420.1 | 168901 | 169900 | 1000 | 1 | 1.82E-08 | 25  | 2.5   | LOC106926980              |                      |
| DMRNW_015095426.1:53401  | NW_015095426.1 | 53401  | 57500  | 4100 | 1 | 2.05E-11 | 183 | 4.463 | nadk2                     |                      |
| DMRNW_015095426.1:90201  | NW_015095426.1 | 90201  | 90400  | 200  | 1 | 4.68E-08 | 1   | 0.5   | sptan1                    |                      |
| DMRNW_015095432.1:27001  | NW_015095432.1 | 27001  | 27500  | 500  | 3 | 9.86E-20 | 5   | 1     | LOC106927110              |                      |
| DMRNW_015095432.1:44801  | NW_015095432.1 | 44801  | 45900  | 1100 | 2 | 8.84E-12 | 41  | 3.727 | LOC106927112              |                      |
| DMRNW_015095434.1:34801  | NW_015095434.1 | 34801  | 37600  | 2800 | 1 | 5.42E-08 | 61  | 2.179 | LOC106927141              |                      |
| DMRNW_015095436.1:197001 | NW_015095436.1 | 197001 | 201500 | 4500 | 4 | 3.33E-10 | 74  | 1.644 | nphs1                     | Extracellular Matrix |
| DMRNW_015095437.1:120901 | NW_015095437.1 | 120901 | 124400 | 3500 | 7 | 8.84E-14 | 103 | 2.943 | LOC106927194              |                      |
| DMRNW_015095441.1:204701 | NW_015095441.1 | 204701 | 208100 | 3400 | 3 | 8.85E-11 | 90  | 2.647 | LOC106927233              |                      |
| DMRNW_015095442.1:54201  | NW_015095442.1 | 54201  | 55900  | 1700 | 9 | 2.11E-13 | 15  | 0.882 |                           |                      |
| DMRNW_015095443.1:240001 | NW_015095443.1 | 240001 | 240400 | 400  | 1 | 8.81E-08 | 18  | 4.5   | cnot11                    |                      |
| DMRNW_015095444.1:103301 | NW_015095444.1 | 103301 | 106600 | 3300 | 3 | 3.06E-10 | 81  | 2.455 | vav3                      | Signaling            |
| DMRNW_015095447.1:270901 | NW_015095447.1 | 270901 | 272100 | 1200 | 1 | 1.52E-08 | 14  | 1.167 | LOC106927302              |                      |
| DMRNW_015095453.1:204801 | NW_015095453.1 | 204801 | 206300 | 1500 | 2 | 7.29E-11 | 25  | 1.667 |                           |                      |
| DMRNW_015095453.1:211501 | NW_015095453.1 | 211501 | 212600 | 1100 | 2 | 5.45E-09 | 36  | 3.273 |                           |                      |
| DMRNW_015095454.1:184401 | NW_015095454.1 | 184401 | 185300 | 900  | 1 | 1.76E-08 | 7   | 0.778 | LOC106927372              |                      |
| DMRNW_015095458.1:18601  | NW_015095458.1 | 18601  | 18900  | 300  | 1 | 2.03E-09 | 7   | 2.333 | baz1a                     | Metabolism           |
| DMRNW_015095460.1:1301   | NW_015095460.1 | 1301   | 1600   | 300  | 1 | 3.03E-08 | 4   | 1.333 | LOC106927437              |                      |
| DMRNW_015095462.1:205801 | NW_015095462.1 | 205801 | 206700 | 900  | 3 | 6.93E-13 | 42  | 4.667 | pgs1                      | Metabolism           |
| DMRNW_015095465.1:99301  | NW_015095465.1 | 99301  | 100600 | 1300 | 1 | 4.70E-08 | 46  | 3.538 | sdccag8                   |                      |
| DMRNW_015095465.1:275701 | NW_015095465.1 | 275701 | 278900 | 3200 | 1 | 1.99E-08 | 56  | 1.75  | LOC106927534              |                      |
| DMRNW_015095466.1:10001  | NW_015095466.1 | 10001  | 11900  | 1900 | 2 | 2.68E-15 | 57  | 3     | LOC106927541              |                      |
| DMRNW_015095471.1:167601 | NW_015095471.1 | 167601 | 170000 | 2400 | 4 | 3.81E-13 | 24  | 1     |                           |                      |
| DMRNW_015095471.1:193401 | NW_015095471.1 | 193401 | 197400 | 4000 | 1 | 1.24E-11 | 128 | 3.2   |                           |                      |
| DMRNW_015095472.1:163601 | NW_015095472.1 | 163601 | 164400 | 800  | 1 | 6.33E-08 | 63  | 7.875 | paf1                      |                      |
| DMRNW_015095473.1:182001 | NW_015095473.1 | 182001 | 182400 | 400  | 1 | 4.08E-09 | 10  | 2.5   | LOC106927638              |                      |
| DMRNW_015095473.1:190201 | NW_015095473.1 | 190201 | 192500 | 2300 | 1 | 2.41E-10 | 65  | 2.826 | tpmt;LOC106927636         |                      |
| DMRNW_015095473.1:212501 | NW_015095473.1 | 212501 | 218100 | 5600 | 2 | 6.41E-15 | 209 | 3.732 |                           |                      |
| DMRNW_015095474.1:299601 | NW_015095474.1 | 299601 | 304500 | 4900 | 2 | 4.60E-10 | 108 | 2.204 | LOC106927654              |                      |



|                          |                |        |        |      |    |          |     |       |                           |               |
|--------------------------|----------------|--------|--------|------|----|----------|-----|-------|---------------------------|---------------|
| DMRNW_015095474.1:314701 | NW_015095474.1 | 314701 | 318600 | 3900 | 1  | 6.46E-08 | 107 | 2.744 | LOC106927653              |               |
| DMRNW_015095477.1:39101  | NW_015095477.1 | 39101  | 42000  | 2900 | 6  | 4.57E-17 | 49  | 1.69  | LOC106927690              |               |
| DMRNW_015095478.1:173801 | NW_015095478.1 | 173801 | 174300 | 500  | 1  | 5.61E-08 | 11  | 2.2   | stard3                    | Metabolism    |
| DMRNW_015095483.1:124301 | NW_015095483.1 | 124301 | 124900 | 600  | 1  | 4.41E-12 | 6   | 1     | LOC106927778              |               |
| DMRNW_015095489.1:9601   | NW_015095489.1 | 9601   | 10100  | 500  | 1  | 1.06E-09 | 3   | 0.6   | lfn2                      | Receptor      |
| DMRNW_015095490.1:55201  | NW_015095490.1 | 55201  | 56000  | 800  | 3  | 1.72E-20 | 7   | 0.875 | LOC106927857              |               |
| DMRNW_015095490.1:61601  | NW_015095490.1 | 61601  | 63000  | 1400 | 1  | 8.63E-08 | 40  | 2.857 | LOC106927857              |               |
| DMRNW_015095499.1:203301 | NW_015095499.1 | 203301 | 206500 | 3200 | 1  | 6.05E-08 | 65  | 2.031 | LOC106927964              |               |
| DMRNW_015095505.1:133701 | NW_015095505.1 | 133701 | 134000 | 300  | 1  | 2.45E-08 | 12  | 4     | smurf1                    | Metabolism    |
| DMRNW_015095506.1:126701 | NW_015095506.1 | 126701 | 127700 | 1000 | 1  | 8.69E-08 | 20  | 2     |                           |               |
| DMRNW_015095509.1:4701   | NW_015095509.1 | 4701   | 9300   | 4600 | 1  | 2.38E-08 | 189 | 4.109 | LOC106928063              |               |
| DMRNW_015095509.1:248401 | NW_015095509.1 | 248401 | 248600 | 200  | 2  | 1.35E-15 | 11  | 5.5   | nit2                      | Metabolism    |
| DMRNW_015095510.1:209901 | NW_015095510.1 | 209901 | 210800 | 900  | 1  | 2.23E-08 | 32  | 3.556 | trim33                    | Transcription |
| DMRNW_015095511.1:190001 | NW_015095511.1 | 190001 | 190900 | 900  | 3  | 9.20E-15 | 20  | 2.222 |                           |               |
| DMRNW_015095516.1:34401  | NW_015095516.1 | 34401  | 35000  | 600  | 1  | 2.80E-08 | 12  | 2     | LOC106928128;LOC106928127 |               |
| DMRNW_015095517.1:17601  | NW_015095517.1 | 17601  | 20500  | 2900 | 2  | 2.18E-18 | 146 | 5.034 | smg7                      |               |
| DMRNW_015095524.1:112601 | NW_015095524.1 | 112601 | 114500 | 1900 | 1  | 3.59E-10 | 42  | 2.211 | LOC106928270              |               |
| DMRNW_015095525.1:110101 | NW_015095525.1 | 110101 | 112700 | 2600 | 2  | 4.21E-08 | 55  | 2.115 |                           |               |
| DMRNW_015095530.1:159501 | NW_015095530.1 | 159501 | 160500 | 1000 | 1  | 4.02E-08 | 17  | 1.7   | LOC106928327;LOC106928326 |               |
| DMRNW_015095531.1:38501  | NW_015095531.1 | 38501  | 40900  | 2400 | 2  | 9.67E-13 | 83  | 3.458 | LOC106928339              |               |
| DMRNW_015095544.1:1      | NW_015095544.1 | 1      | 1300   | 1300 | 1  | 5.44E-08 | 55  | 4.231 | LOC106928514              |               |
| DMRNW_015095544.1:132301 | NW_015095544.1 | 132301 | 134600 | 2300 | 2  | 4.36E-08 | 52  | 2.261 |                           |               |
| DMRNW_015095548.1:116101 | NW_015095548.1 | 116101 | 118500 | 2400 | 1  | 9.15E-09 | 68  | 2.833 | fam13b                    |               |
| DMRNW_015095550.1:215301 | NW_015095550.1 | 215301 | 217306 | 2006 | 2  | 1.42E-08 | 60  | 2.991 |                           |               |
| DMRNW_015095556.1:231001 | NW_015095556.1 | 231001 | 231700 | 700  | 1  | 2.20E-08 | 36  | 5.143 | LOC106928678              |               |
| DMRNW_015095567.1:164101 | NW_015095567.1 | 164101 | 165000 | 900  | 1  | 2.92E-09 | 33  | 3.667 | LOC106928770              |               |
| DMRNW_015095568.1:1001   | NW_015095568.1 | 1001   | 1600   | 600  | 1  | 2.77E-08 | 15  | 2.5   |                           |               |
| DMRNW_015095572.1:184501 | NW_015095572.1 | 184501 | 185700 | 1200 | 1  | 1.13E-08 | 51  | 4.25  |                           |               |
| DMRNW_015095576.1:323101 | NW_015095576.1 | 323101 | 324000 | 900  | 1  | 5.09E-12 | 12  | 1.333 |                           |               |
| DMRNW_015095581.1:13601  | NW_015095581.1 | 13601  | 14000  | 400  | 1  | 7.06E-08 | 22  | 5.5   | inpp4a                    |               |
| DMRNW_015095582.1:205001 | NW_015095582.1 | 205001 | 205300 | 300  | 1  | 6.37E-11 | 23  | 7.667 | slit3                     | Development   |
| DMRNW_015095587.1:21701  | NW_015095587.1 | 21701  | 22300  | 600  | 1  | 5.05E-08 | 18  | 3     | atp11b                    | Transport     |
| DMRNW_015095588.1:157601 | NW_015095588.1 | 157601 | 160900 | 3300 | 1  | 4.39E-08 | 77  | 2.333 | LOC106928996              |               |
| DMRNW_015095590.1:163601 | NW_015095590.1 | 163601 | 165400 | 1800 | 2  | 2.15E-08 | 51  | 2.833 | col11a1                   |               |
| DMRNW_015095591.1:29401  | NW_015095591.1 | 29401  | 31400  | 2000 | 2  | 4.47E-09 | 36  | 1.8   | LOC106929031              |               |
| DMRNW_015095593.1:183701 | NW_015095593.1 | 183701 | 184000 | 300  | 1  | 3.04E-08 | 2   | 0.667 | pkib                      |               |
| DMRNW_015095596.1:39301  | NW_015095596.1 | 39301  | 42100  | 2800 | 2  | 3.00E-12 | 200 | 7.143 | LOC106929083              |               |
| DMRNW_015095600.1:501    | NW_015095600.1 | 501    | 1000   | 500  | 1  | 8.68E-08 | 14  | 2.8   |                           |               |
| DMRNW_015095605.1:166201 | NW_015095605.1 | 166201 | 168100 | 1900 | 1  | 3.61E-09 | 59  | 3.105 |                           |               |
| DMRNW_015095608.1:39601  | NW_015095608.1 | 39601  | 40200  | 600  | 1  | 4.80E-08 | 22  | 3.667 | LOC106929167              |               |
| DMRNW_015095612.1:164701 | NW_015095612.1 | 164701 | 165100 | 400  | 2  | 4.50E-12 | 3   | 0.75  | ankrd1                    |               |
| DMRNW_015095612.1:190101 | NW_015095612.1 | 190101 | 192100 | 2000 | 2  | 3.32E-15 | 49  | 2.45  | kif20b                    | Cytoskeleton  |
| DMRNW_015095614.1:87601  | NW_015095614.1 | 87601  | 88600  | 1000 | 1  | 9.57E-11 | 41  | 4.1   |                           |               |
| DMRNW_015095616.1:186601 | NW_015095616.1 | 186601 | 186900 | 300  | 1  | 5.96E-09 | 15  | 5     | LOC106929245              |               |
| DMRNW_015095617.1:283201 | NW_015095617.1 | 283201 | 284600 | 1400 | 1  | 3.66E-08 | 60  | 4.286 | ankrd46                   |               |
| DMRNW_015095617.1:293701 | NW_015095617.1 | 293701 | 294500 | 800  | 2  | 1.31E-10 | 18  | 2.25  | ankrd46                   |               |
| DMRNW_015095620.1:163301 | NW_015095620.1 | 163301 | 165400 | 2100 | 2  | 8.81E-10 | 72  | 3.429 | maob                      |               |
| DMRNW_015095624.1:53901  | NW_015095624.1 | 53901  | 55300  | 1400 | 2  | 3.30E-09 | 47  | 3.357 | setd5                     |               |
| DMRNW_015095625.1:216801 | NW_015095625.1 | 216801 | 219100 | 2300 | 6  | 1.12E-16 | 72  | 3.13  | LOC106929339              |               |
| DMRNW_015095627.1:56301  | NW_015095627.1 | 56301  | 58500  | 2200 | 11 | 1.55E-25 | 65  | 2.955 | LOC106929359              |               |
| DMRNW_015095627.1:181801 | NW_015095627.1 | 181801 | 184600 | 2800 | 1  | 5.92E-08 | 61  | 2.179 | gpr139                    | Receptor      |
| DMRNW_015095640.1:1201   | NW_015095640.1 | 1201   | 3900   | 2700 | 1  | 3.06E-08 | 127 | 4.704 |                           |               |
| DMRNW_015095640.1:33601  | NW_015095640.1 | 33601  | 35700  | 2100 | 1  | 1.64E-09 | 93  | 4.429 | atp8b1                    | Transport     |
| DMRNW_015095640.1:43101  | NW_015095640.1 | 43101  | 44400  | 1300 | 1  | 2.28E-08 | 27  | 2.077 | LOC106929464              |               |
| DMRNW_015095640.1:48201  | NW_015095640.1 | 48201  | 48700  | 500  | 1  | 3.77E-09 | 0   | 0     | LOC106929464              |               |
| DMRNW_015095640.1:235201 | NW_015095640.1 | 235201 | 240900 | 5700 | 2  | 1.74E-10 | 223 | 3.912 | dcc                       | Receptor      |
| DMRNW_015095653.1:20301  | NW_015095653.1 | 20301  | 20700  | 400  | 2  | 2.61E-09 | 10  | 2.5   |                           |               |
| DMRNW_015095658.1:73001  | NW_015095658.1 | 73001  | 75300  | 2300 | 1  | 5.81E-09 | 31  | 1.348 | LOC106929607              |               |
| DMRNW_015095658.1:91101  | NW_015095658.1 | 91101  | 93100  | 2000 | 1  | 1.28E-08 | 108 | 5.4   | armac5                    | Unknown       |
| DMRNW_015095658.1:109901 | NW_015095658.1 | 109901 | 110600 | 700  | 1  | 2.54E-08 | 26  | 3.714 | LOC106929611              |               |
| DMRNW_015095659.1:85801  | NW_015095659.1 | 85801  | 89000  | 3200 | 1  | 8.10E-08 | 182 | 5.688 | LOC106929617              |               |
| DMRNW_015095670.1:145101 | NW_015095670.1 | 145101 | 146300 | 1200 | 1  | 3.63E-08 | 11  | 0.917 | igsf21                    | Immune        |
| DMRNW_015095672.1:98401  | NW_015095672.1 | 98401  | 102100 | 3700 | 5  | 1.61E-11 | 107 | 2.892 | scara5                    | Unknown       |
| DMRNW_015095675.1:21201  | NW_015095675.1 | 21201  | 22200  | 1000 | 1  | 6.43E-08 | 38  | 3.8   |                           |               |
| DMRNW_015095675.1:196101 | NW_015095675.1 | 196101 | 198000 | 1900 | 1  | 2.86E-09 | 60  | 3.158 | LOC106929752              |               |
| DMRNW_015095686.1:92101  | NW_015095686.1 | 92101  | 93000  | 900  | 1  | 1.88E-08 | 24  | 2.667 | dhx32                     | Transcription |
| DMRNW_015095691.1:96701  | NW_015095691.1 | 96701  | 100500 | 3800 | 3  | 9.78E-11 | 129 | 3.395 | telo2                     |               |
| DMRNW_015095691.1:347501 | NW_015095691.1 | 347501 | 348300 | 800  | 2  | 2.19E-10 | 13  | 1.625 | LOC106929885              |               |
| DMRNW_015095693.1:166801 | NW_015095693.1 | 166801 | 167100 | 300  | 1  | 2.81E-08 | 7   | 2.333 |                           |               |
| DMRNW_015095694.1:78501  | NW_015095694.1 | 78501  | 78800  | 300  | 1  | 7.79E-08 | 1   | 0.333 | LOC106929905              |               |
| DMRNW_015095699.1:40901  | NW_015095699.1 | 40901  | 46700  | 5800 | 3  | 1.10E-15 | 163 | 2.81  | LOC106929942              |               |
| DMRNW_015095699.1:90001  | NW_015095699.1 | 90001  | 91700  | 1700 | 1  | 1.31E-08 | 42  | 2.471 |                           |               |
| DMRNW_015095701.1:185701 | NW_015095701.1 | 185701 | 186000 | 300  | 1  | 3.32E-10 | 4   | 1.333 | LOC106929958              |               |

|                          |                |        |        |      |    |          |     |       |                           |               |
|--------------------------|----------------|--------|--------|------|----|----------|-----|-------|---------------------------|---------------|
| DMRNW_015095702.1:163401 | NW_015095702.1 | 163401 | 166600 | 3200 | 1  | 5.55E-09 | 83  | 2.594 | LOC106929967              |               |
| DMRNW_015095703.1:187901 | NW_015095703.1 | 187901 | 189300 | 1400 | 6  | 1.74E-16 | 31  | 2.214 |                           |               |
| DMRNW_015095703.1:196501 | NW_015095703.1 | 196501 | 197000 | 500  | 2  | 1.25E-15 | 9   | 1.8   |                           |               |
| DMRNW_015095706.1:167301 | NW_015095706.1 | 167301 | 168100 | 800  | 2  | 4.85E-13 | 20  | 2.5   | LOC106930034              |               |
| DMRNW_015095713.1:44001  | NW_015095713.1 | 44001  | 44300  | 300  | 1  | 1.22E-08 | 3   | 1     | garnl3                    | Signaling     |
| DMRNW_015095720.1:146001 | NW_015095720.1 | 146001 | 148900 | 2900 | 1  | 8.52E-10 | 91  | 3.138 | sytl5                     | Development   |
| DMRNW_015095721.1:73201  | NW_015095721.1 | 73201  | 74800  | 1600 | 1  | 3.87E-10 | 41  | 2.562 |                           |               |
| DMRNW_015095723.1:17601  | NW_015095723.1 | 17601  | 17700  | 100  | 1  | 1.10E-09 | 1   | 1     | LOC106930191              |               |
| DMRNW_015095723.1:21401  | NW_015095723.1 | 21401  | 22700  | 1300 | 9  | 3.48E-20 | 16  | 1.231 | LOC106930191              |               |
| DMRNW_015095723.1:26501  | NW_015095723.1 | 26501  | 27600  | 1100 | 4  | 3.25E-14 | 45  | 4.091 | LOC106930191              |               |
| DMRNW_015095723.1:75601  | NW_015095723.1 | 75601  | 75900  | 300  | 1  | 1.87E-10 | 8   | 2.667 | apc2                      | Cytoskeleton  |
| DMRNW_015095723.1:81801  | NW_015095723.1 | 81801  | 82700  | 900  | 1  | 2.36E-08 | 12  | 1.333 | apc2                      | Cytoskeleton  |
| DMRNW_015095726.1:40901  | NW_015095726.1 | 40901  | 41100  | 200  | 1  | 8.85E-08 | 5   | 2.5   | bcas3                     | Transcription |
| DMRNW_015095738.1:77401  | NW_015095738.1 | 77401  | 79000  | 1600 | 1  | 4.15E-10 | 39  | 2.438 |                           |               |
| DMRNW_015095745.1:132301 | NW_015095745.1 | 132301 | 133500 | 1200 | 2  | 1.58E-09 | 37  | 3.083 | LOC106930411;LOC106930412 |               |
| DMRNW_015095745.1:165701 | NW_015095745.1 | 165701 | 166000 | 300  | 1  | 9.45E-16 | 16  | 5.333 | socs5                     | Signaling     |
| DMRNW_015095751.1:133701 | NW_015095751.1 | 133701 | 137000 | 3300 | 2  | 1.71E-09 | 123 | 3.727 | efnb1                     | Signaling     |
| DMRNW_015095754.1:26901  | NW_015095754.1 | 26901  | 27500  | 600  | 3  | 1.41E-14 | 15  | 2.5   | LOC106930500              |               |
| DMRNW_015095754.1:69401  | NW_015095754.1 | 69401  | 70300  | 900  | 1  | 3.89E-11 | 61  | 6.778 | LOC106930504              |               |
| DMRNW_015095760.1:156401 | NW_015095760.1 | 156401 | 158300 | 1900 | 2  | 9.34E-18 | 19  | 1     |                           |               |
| DMRNW_015095762.1:67001  | NW_015095762.1 | 67001  | 71800  | 4800 | 3  | 3.68E-10 | 119 | 2.479 | kirrel3                   |               |
| DMRNW_015095765.1:168101 | NW_015095765.1 | 168101 | 169100 | 1000 | 4  | 5.98E-27 | 20  | 2     | tmeff2                    | Signaling     |
| DMRNW_015095771.1:41001  | NW_015095771.1 | 41001  | 44800  | 3800 | 1  | 3.91E-08 | 100 | 2.632 | LOC106930631              |               |
| DMRNW_015095790.1:305201 | NW_015095790.1 | 305201 | 305572 | 372  | 1  | 2.28E-08 | 4   | 1.075 |                           |               |
| DMRNW_015095791.1:3901   | NW_015095791.1 | 3901   | 7000   | 3100 | 1  | 4.17E-09 | 106 | 3.419 | LOC106930745              |               |
| DMRNW_015095801.1:171601 | NW_015095801.1 | 171601 | 172600 | 1000 | 1  | 1.84E-09 | 28  | 2.8   |                           |               |
| DMRNW_015095807.1:261101 | NW_015095807.1 | 261101 | 266200 | 5100 | 23 | 8.02E-31 | 142 | 2.784 |                           |               |
| DMRNW_015095808.1:58201  | NW_015095808.1 | 58201  | 60500  | 2300 | 1  | 9.21E-08 | 67  | 2.913 | slc1a7                    | Transport     |
| DMRNW_015095810.1:15701  | NW_015095810.1 | 15701  | 17400  | 1700 | 2  | 9.65E-11 | 64  | 3.765 | LOC106930863              |               |
| DMRNW_015095816.1:55101  | NW_015095816.1 | 55101  | 56800  | 1700 | 3  | 2.23E-10 | 56  | 3.294 | LOC106930904              |               |
| DMRNW_015095817.1:37701  | NW_015095817.1 | 37701  | 39000  | 1300 | 1  | 4.33E-08 | 43  | 3.308 | LOC106930915              |               |
| DMRNW_015095828.1:26701  | NW_015095828.1 | 26701  | 29200  | 2500 | 1  | 5.30E-08 | 80  | 3.2   | LOC106931031              |               |
| DMRNW_015095828.1:78101  | NW_015095828.1 | 78101  | 79300  | 1200 | 12 | 4.03E-40 | 19  | 1.583 |                           |               |
| DMRNW_015095831.1:50001  | NW_015095831.1 | 50001  | 50400  | 400  | 1  | 4.64E-08 | 17  | 4.25  |                           |               |
| DMRNW_015095845.1:111601 | NW_015095845.1 | 111601 | 116600 | 5000 | 1  | 8.71E-08 | 169 | 3.38  | LOC106931148              |               |
| DMRNW_015095845.1:217301 | NW_015095845.1 | 217301 | 222600 | 5300 | 1  | 3.00E-08 | 188 | 3.547 | rgl1                      | Signaling     |
| DMRNW_015095853.1:49201  | NW_015095853.1 | 49201  | 50300  | 1100 | 1  | 2.88E-08 | 49  | 4.455 |                           |               |
| DMRNW_015095860.1:62401  | NW_015095860.1 | 62401  | 63400  | 1000 | 1  | 4.95E-12 | 15  | 1.5   | LOC106931292              |               |
| DMRNW_015095866.1:47601  | NW_015095866.1 | 47601  | 49200  | 1600 | 1  | 3.15E-08 | 43  | 2.688 |                           |               |
| DMRNW_015095875.1:272201 | NW_015095875.1 | 272201 | 273200 | 1000 | 1  | 2.32E-08 | 29  | 2.9   | LOC106931407              |               |
| DMRNW_015095888.1:126701 | NW_015095888.1 | 126701 | 127300 | 600  | 1  | 5.29E-11 | 10  | 1.667 | dhx36                     | Transcription |
| DMRNW_015095890.1:138901 | NW_015095890.1 | 138901 | 142500 | 3600 | 1  | 2.99E-08 | 111 | 3.083 | LOC106931550              |               |
| DMRNW_015095892.1:27201  | NW_015095892.1 | 27201  | 28800  | 1600 | 1  | 7.87E-09 | 37  | 2.312 | tcf4                      | Transcription |
| DMRNW_015095892.1:146201 | NW_015095892.1 | 146201 | 148500 | 2300 | 2  | 1.16E-14 | 70  | 3.043 | tcf4                      | Transcription |
| DMRNW_015095892.1:158001 | NW_015095892.1 | 158001 | 158500 | 500  | 1  | 4.49E-08 | 4   | 0.8   | tcf4                      | Transcription |
| DMRNW_015095894.1:154901 | NW_015095894.1 | 154901 | 155400 | 500  | 1  | 7.72E-09 | 20  | 4     | LOC106931560              |               |
| DMRNW_015095900.1:135101 | NW_015095900.1 | 135101 | 137200 | 2100 | 2  | 3.23E-09 | 55  | 2.619 | ptk7                      |               |
| DMRNW_015095901.1:59001  | NW_015095901.1 | 59001  | 60700  | 1700 | 1  | 2.53E-09 | 60  | 3.529 | neu1                      | Development   |
| DMRNW_015095904.1:81401  | NW_015095904.1 | 81401  | 82300  | 900  | 1  | 3.67E-12 | 32  | 3.556 | LOC106931627              |               |
| DMRNW_015095907.1:117301 | NW_015095907.1 | 117301 | 118600 | 1300 | 1  | 3.80E-08 | 32  | 2.462 | rnf111                    | Proteolysis   |
| DMRNW_015095914.1:46401  | NW_015095914.1 | 46401  | 47100  | 700  | 3  | 2.88E-11 | 2   | 0.286 |                           |               |
| DMRNW_015095914.1:50001  | NW_015095914.1 | 50001  | 50600  | 600  | 1  | 4.60E-11 | 1   | 0.167 | LOC106931709              |               |
| DMRNW_015095916.1:23701  | NW_015095916.1 | 23701  | 24000  | 300  | 1  | 6.53E-08 | 19  | 6.333 | rusc2                     |               |
| DMRNW_015095919.1:159801 | NW_015095919.1 | 159801 | 160100 | 300  | 2  | 1.22E-08 | 9   | 3     | ncaph2                    |               |
| DMRNW_015095919.1:162801 | NW_015095919.1 | 162801 | 165300 | 2500 | 1  | 4.65E-10 | 61  | 2.44  |                           |               |
| DMRNW_015095921.1:140701 | NW_015095921.1 | 140701 | 143400 | 2700 | 1  | 5.53E-08 | 107 | 3.963 | LOC106931783;LOC106931784 |               |
| DMRNW_015095922.1:165001 | NW_015095922.1 | 165001 | 166600 | 1600 | 1  | 3.03E-08 | 51  | 3.188 | LOC106931789              |               |
| DMRNW_015095923.1:106801 | NW_015095923.1 | 106801 | 108000 | 1200 | 1  | 1.11E-09 | 28  | 2.333 |                           |               |
| DMRNW_015095926.1:5401   | NW_015095926.1 | 5401   | 5900   | 500  | 1  | 1.94E-09 | 4   | 0.8   |                           |               |
| DMRNW_015095929.1:84801  | NW_015095929.1 | 84801  | 86100  | 1300 | 1  | 6.57E-11 | 9   | 0.692 |                           |               |
| DMRNW_015095930.1:155601 | NW_015095930.1 | 155601 | 156000 | 400  | 1  | 1.20E-11 | 3   | 0.75  |                           |               |
| DMRNW_015095931.1:144401 | NW_015095931.1 | 144401 | 146900 | 2500 | 5  | 1.48E-20 | 60  | 2.4   |                           |               |
| DMRNW_015095941.1:84101  | NW_015095941.1 | 84101  | 85700  | 1600 | 3  | 9.66E-09 | 43  | 2.688 |                           |               |
| DMRNW_015095944.1:132901 | NW_015095944.1 | 132901 | 133200 | 300  | 1  | 3.50E-11 | 7   | 2.333 | LOC106931923              |               |
| DMRNW_015095951.1:158701 | NW_015095951.1 | 158701 | 159300 | 600  | 1  | 6.69E-08 | 18  | 3     | cnst                      |               |
| DMRNW_015095951.1:292501 | NW_015095951.1 | 292501 | 293000 | 500  | 1  | 8.49E-10 | 8   | 1.6   | LOC106931972              |               |
| DMRNW_015095952.1:103401 | NW_015095952.1 | 103401 | 108500 | 5100 | 3  | 2.18E-14 | 156 | 3.059 | nop9                      |               |
| DMRNW_015095955.1:51801  | NW_015095955.1 | 51801  | 52900  | 1100 | 1  | 3.69E-08 | 47  | 4.273 | gigyf1                    |               |
| DMRNW_015095958.1:127101 | NW_015095958.1 | 127101 | 127800 | 700  | 2  | 5.79E-16 | 23  | 3.286 | LOC106932059              |               |
| DMRNW_015095972.1:115001 | NW_015095972.1 | 115001 | 115400 | 400  | 1  | 1.59E-08 | 5   | 1.25  |                           |               |
| DMRNW_015095975.1:48401  | NW_015095975.1 | 48401  | 49300  | 900  | 4  | 1.27E-14 | 24  | 2.667 | atrn                      | Signaling     |
| DMRNW_015095976.1:17701  | NW_015095976.1 | 17701  | 19500  | 1800 | 3  | 6.16E-12 | 32  | 1.778 | LOC106932196              |               |
| DMRNW_015095980.1:53701  | NW_015095980.1 | 53701  | 54000  | 300  | 1  | 3.43E-08 | 14  | 4.667 |                           |               |

|                          |                |        |        |      |   |          |     |       |                           |               |
|--------------------------|----------------|--------|--------|------|---|----------|-----|-------|---------------------------|---------------|
| DMRNW_015095981.1:111601 | NW_015095981.1 | 111601 | 113300 | 1700 | 1 | 1.68E-08 | 69  | 4.059 | wwox                      | Metabolism    |
| DMRNW_015095982.1:121401 | NW_015095982.1 | 121401 | 123300 | 1900 | 1 | 5.12E-09 | 39  | 2.053 | LOC106932241              |               |
| DMRNW_015095985.1:83701  | NW_015095985.1 | 83701  | 84200  | 500  | 1 | 6.41E-08 | 12  | 2.4   | LOC106932261              |               |
| DMRNW_015095995.1:153801 | NW_015095995.1 | 153801 | 155700 | 1900 | 1 | 3.03E-08 | 27  | 1.421 |                           |               |
| DMRNW_015096001.1:48201  | NW_015096001.1 | 48201  | 48600  | 400  | 1 | 1.30E-10 | 30  | 7.5   | rcor3                     | Transcription |
| DMRNW_015096002.1:70801  | NW_015096002.1 | 70801  | 72400  | 1600 | 1 | 5.61E-08 | 22  | 1.375 | LOC106932400              |               |
| DMRNW_015096004.1:138501 | NW_015096004.1 | 138501 | 138900 | 400  | 1 | 4.27E-08 | 16  | 4     | rfx5                      |               |
| DMRNW_015096005.1:77901  | NW_015096005.1 | 77901  | 81500  | 3600 | 1 | 1.64E-08 | 84  | 2.333 | cnksr2                    | Signaling     |
| DMRNW_015096005.1:147801 | NW_015096005.1 | 147801 | 148400 | 600  | 4 | 2.14E-20 | 19  | 3.167 | LOC106932437              |               |
| DMRNW_015096011.1:125901 | NW_015096011.1 | 125901 | 128300 | 2400 | 1 | 3.18E-08 | 88  | 3.667 |                           |               |
| DMRNW_015096015.1:110801 | NW_015096015.1 | 110801 | 111200 | 400  | 3 | 3.95E-11 | 4   | 1     |                           |               |
| DMRNW_015096016.1:156001 | NW_015096016.1 | 156001 | 157400 | 1400 | 1 | 8.49E-10 | 36  | 2.571 |                           |               |
| DMRNW_015096019.1:150101 | NW_015096019.1 | 150101 | 150300 | 200  | 1 | 5.40E-08 | 24  | 12    | LOC106932526              |               |
| DMRNW_015096035.1:124501 | NW_015096035.1 | 124501 | 124700 | 200  | 1 | 5.71E-09 | 8   | 4     |                           |               |
| DMRNW_015096040.1:50901  | NW_015096040.1 | 50901  | 55400  | 4500 | 2 | 3.25E-17 | 126 | 2.8   | LOC106932722              |               |
| DMRNW_015096047.1:19601  | NW_015096047.1 | 19601  | 24000  | 4400 | 1 | 1.75E-11 | 122 | 2.773 |                           |               |
| DMRNW_015096047.1:129401 | NW_015096047.1 | 129401 | 131200 | 1800 | 2 | 6.62E-10 | 44  | 2.444 | cldn11                    | Cytoskeleton  |
| DMRNW_015096047.1:157801 | NW_015096047.1 | 157801 | 159100 | 1300 | 1 | 7.39E-08 | 31  | 2.385 | slc7a14;LOC106932775      | Transport     |
| DMRNW_015096047.1:246801 | NW_015096047.1 | 246801 | 248300 | 1500 | 2 | 3.87E-10 | 30  | 2     |                           |               |
| DMRNW_015096053.1:5501   | NW_015096053.1 | 5501   | 7900   | 2400 | 1 | 1.85E-08 | 88  | 3.667 | LOC106932839              |               |
| DMRNW_015096053.1:21501  | NW_015096053.1 | 21501  | 29200  | 7700 | 1 | 9.58E-08 | 323 | 4.195 | eif5b                     | Translation   |
| DMRNW_015096053.1:84301  | NW_015096053.1 | 84301  | 85500  | 1200 | 1 | 5.85E-11 | 42  | 3.5   | LOC106932835              |               |
| DMRNW_015096055.1:139601 | NW_015096055.1 | 139601 | 140900 | 1300 | 2 | 4.10E-12 | 59  | 4.538 | LOC106932843              |               |
| DMRNW_015096056.1:60101  | NW_015096056.1 | 60101  | 63400  | 3300 | 1 | 1.74E-11 | 112 | 3.394 | LOC106932848              |               |
| DMRNW_015096056.1:78701  | NW_015096056.1 | 78701  | 79600  | 900  | 1 | 8.99E-12 | 8   | 0.889 |                           |               |
| DMRNW_015096060.1:153001 | NW_015096060.1 | 153001 | 153500 | 500  | 1 | 1.25E-09 | 33  | 6.6   |                           |               |
| DMRNW_015096066.1:66401  | NW_015096066.1 | 66401  | 68800  | 2400 | 1 | 1.76E-08 | 50  | 2.083 |                           |               |
| DMRNW_015096071.1:44401  | NW_015096071.1 | 44401  | 45500  | 1100 | 2 | 7.65E-09 | 25  | 2.273 |                           |               |
| DMRNW_015096075.1:1      | NW_015096075.1 | 1      | 500    | 500  | 2 | 2.33E-11 | 1   | 0.2   |                           |               |
| DMRNW_015096075.1:20401  | NW_015096075.1 | 20401  | 20600  | 200  | 1 | 3.80E-08 | 7   | 3.5   | LOC106932972              |               |
| DMRNW_015096075.1:60601  | NW_015096075.1 | 60601  | 61000  | 400  | 1 | 9.84E-08 | 16  | 4     |                           |               |
| DMRNW_015096081.1:43001  | NW_015096081.1 | 43001  | 45800  | 2800 | 1 | 4.54E-08 | 49  | 1.75  | ptk2                      | Signaling     |
| DMRNW_015096082.1:106001 | NW_015096082.1 | 106001 | 106600 | 600  | 1 | 1.00E-10 | 30  | 5     | LOC106933022              |               |
| DMRNW_015096085.1:91901  | NW_015096085.1 | 91901  | 93500  | 1600 | 1 | 5.13E-15 | 25  | 1.562 |                           |               |
| DMRNW_015096097.1:2101   | NW_015096097.1 | 2101   | 2500   | 400  | 1 | 1.86E-08 | 8   | 2     | LOC106933152              |               |
| DMRNW_015096103.1:90501  | NW_015096103.1 | 90501  | 92500  | 2000 | 5 | 9.32E-12 | 73  | 3.65  |                           |               |
| DMRNW_015096103.1:195301 | NW_015096103.1 | 195301 | 197300 | 2000 | 2 | 9.56E-09 | 45  | 2.25  |                           |               |
| DMRNW_015096106.1:36601  | NW_015096106.1 | 36601  | 37700  | 1100 | 3 | 4.70E-13 | 46  | 4.182 | LOC106933230              |               |
| DMRNW_015096115.1:87401  | NW_015096115.1 | 87401  | 87700  | 300  | 1 | 1.03E-09 | 3   | 1     |                           |               |
| DMRNW_015096129.1:75301  | NW_015096129.1 | 75301  | 76300  | 1000 | 1 | 1.84E-10 | 11  | 1.1   |                           |               |
| DMRNW_015096139.1:89101  | NW_015096139.1 | 89101  | 91600  | 2500 | 1 | 3.23E-14 | 135 | 5.4   | LOC106933445              |               |
| DMRNW_015096139.1:137601 | NW_015096139.1 | 137601 | 142500 | 4900 | 1 | 5.15E-08 | 197 | 4.02  | LOC106933448              |               |
| DMRNW_015096143.1:35201  | NW_015096143.1 | 35201  | 35600  | 400  | 2 | 1.69E-17 | 3   | 0.75  | LOC106933474              |               |
| DMRNW_015096147.1:39701  | NW_015096147.1 | 39701  | 42700  | 3000 | 1 | 6.67E-08 | 72  | 2.4   |                           |               |
| DMRNW_015096152.1:2001   | NW_015096152.1 | 2001   | 3400   | 1400 | 1 | 9.96E-08 | 28  | 2     |                           |               |
| DMRNW_015096167.1:94801  | NW_015096167.1 | 94801  | 95500  | 700  | 1 | 3.86E-10 | 46  | 6.571 | LOC106933629;pus10        |               |
| DMRNW_015096170.1:51201  | NW_015096170.1 | 51201  | 55100  | 3900 | 2 | 2.12E-11 | 149 | 3.821 |                           |               |
| DMRNW_015096170.1:222201 | NW_015096170.1 | 222201 | 222400 | 200  | 1 | 2.16E-09 | 15  | 7.5   | itpr3                     |               |
| DMRNW_015096173.1:134201 | NW_015096173.1 | 134201 | 136500 | 2300 | 1 | 1.39E-09 | 55  | 2.391 | LOC106933670              |               |
| DMRNW_015096176.1:62101  | NW_015096176.1 | 62101  | 62500  | 400  | 1 | 1.12E-08 | 18  | 4.5   | zc3h4                     |               |
| DMRNW_015096177.1:98601  | NW_015096177.1 | 98601  | 99800  | 1200 | 2 | 2.09E-10 | 27  | 2.25  | LOC106933692;LOC106933695 |               |
| DMRNW_015096177.1:102101 | NW_015096177.1 | 102101 | 103900 | 1800 | 2 | 2.22E-12 | 70  | 3.889 | LOC106933692              |               |
| DMRNW_015096180.1:19701  | NW_015096180.1 | 19701  | 20900  | 1200 | 4 | 9.86E-22 | 26  | 2.167 | cntn2                     | Cytoskeleton  |
| DMRNW_015096197.1:109701 | NW_015096197.1 | 109701 | 111700 | 2000 | 1 | 5.66E-09 | 42  | 2.1   | LOC106933811              |               |
| DMRNW_015096199.1:54901  | NW_015096199.1 | 54901  | 56300  | 1400 | 1 | 5.67E-10 | 44  | 3.143 |                           |               |
| DMRNW_015096201.1:11001  | NW_015096201.1 | 11001  | 15000  | 4000 | 1 | 1.52E-08 | 106 | 2.65  | LOC106933848              |               |
| DMRNW_015096201.1:42101  | NW_015096201.1 | 42101  | 42800  | 700  | 2 | 1.80E-10 | 6   | 0.857 | anapc1                    | Cell Cycle    |
| DMRNW_015096208.1:112601 | NW_015096208.1 | 112601 | 112900 | 300  | 1 | 4.25E-08 | 7   | 2.333 | inadl                     | Cytoskeleton  |
| DMRNW_015096208.1:123101 | NW_015096208.1 | 123101 | 125400 | 2300 | 1 | 4.95E-11 | 103 | 4.478 | inadl;LOC106933912        | Cytoskeleton  |
| DMRNW_015096210.1:30801  | NW_015096210.1 | 30801  | 32600  | 1800 | 2 | 1.20E-17 | 46  | 2.556 | LOC106933922              |               |
| DMRNW_015096215.1:94701  | NW_015096215.1 | 94701  | 97000  | 2300 | 1 | 3.87E-09 | 147 | 6.391 | slx4                      |               |
| DMRNW_015096218.1:25001  | NW_015096218.1 | 25001  | 26800  | 1800 | 2 | 3.73E-08 | 75  | 4.167 | LOC106933963              |               |
| DMRNW_015096228.1:52001  | NW_015096228.1 | 52001  | 55100  | 3100 | 5 | 2.77E-11 | 62  | 2     |                           |               |
| DMRNW_015096230.1:23301  | NW_015096230.1 | 23301  | 23500  | 200  | 1 | 2.23E-08 | 0   | 0     | LOC106934046              |               |
| DMRNW_015096230.1:29201  | NW_015096230.1 | 29201  | 31900  | 2700 | 2 | 6.13E-15 | 69  | 2.556 | LOC106934041              |               |
| DMRNW_015096230.1:119901 | NW_015096230.1 | 119901 | 121000 | 1100 | 2 | 1.35E-23 | 60  | 5.455 | LOC106934044              |               |
| DMRNW_015096230.1:136801 | NW_015096230.1 | 136801 | 139200 | 2400 | 1 | 4.50E-08 | 78  | 3.25  |                           |               |
| DMRNW_015096231.1:16101  | NW_015096231.1 | 16101  | 17600  | 1500 | 2 | 4.72E-11 | 34  | 2.267 | LOC106934051              |               |
| DMRNW_015096231.1:92301  | NW_015096231.1 | 92301  | 92900  | 600  | 1 | 1.93E-08 | 13  | 2.167 | LOC106934054              |               |
| DMRNW_015096236.1:33201  | NW_015096236.1 | 33201  | 38500  | 5300 | 2 | 6.70E-10 | 144 | 2.717 | LOC106934076              |               |
| DMRNW_015096239.1:41701  | NW_015096239.1 | 41701  | 44500  | 2800 | 1 | 7.83E-08 | 72  | 2.571 | mtor                      | Signaling     |
| DMRNW_015096239.1:81701  | NW_015096239.1 | 81701  | 82300  | 600  | 1 | 4.25E-10 | 5   | 0.833 | mtor                      | Signaling     |
| DMRNW_015096242.1:99501  | NW_015096242.1 | 99501  | 102200 | 2700 | 1 | 1.44E-09 | 60  | 2.222 | LOC106934130              |               |

|                          |                |        |        |      |    |          |     |       |                           |               |
|--------------------------|----------------|--------|--------|------|----|----------|-----|-------|---------------------------|---------------|
| DMRNW_015096243.1:91701  | NW_015096243.1 | 91701  | 93000  | 1300 | 2  | 1.43E-09 | 10  | 0.769 | larp4b                    |               |
| DMRNW_015096246.1:84001  | NW_015096246.1 | 84001  | 84400  | 400  | 1  | 4.42E-10 | 23  | 5.75  | lyrm4                     |               |
| DMRNW_015096246.1:127601 | NW_015096246.1 | 127601 | 128200 | 600  | 2  | 4.33E-08 | 22  | 3.667 |                           |               |
| DMRNW_015096247.1:27701  | NW_015096247.1 | 27701  | 34200  | 6500 | 1  | 1.67E-08 | 130 | 2     | LOC106934173;slc35e2b     | Transport     |
| DMRNW_015096247.1:36001  | NW_015096247.1 | 36001  | 37900  | 1900 | 1  | 1.12E-09 | 40  | 2.105 | slc35e2b                  | Transport     |
| DMRNW_015096257.1:35101  | NW_015096257.1 | 35101  | 36100  | 1000 | 8  | 1.43E-15 | 71  | 7.1   | LOC106934239              |               |
| DMRNW_015096257.1:126201 | NW_015096257.1 | 126201 | 129000 | 2800 | 1  | 7.66E-09 | 149 | 5.321 | LOC106934240              |               |
| DMRNW_015096258.1:132501 | NW_015096258.1 | 132501 | 134862 | 2362 | 3  | 6.02E-27 | 37  | 1.566 |                           |               |
| DMRNW_015096259.1:6101   | NW_015096259.1 | 6101   | 7200   | 1100 | 3  | 4.55E-11 | 26  | 2.364 |                           |               |
| DMRNW_015096263.1:201301 | NW_015096263.1 | 201301 | 204000 | 2700 | 1  | 1.06E-17 | 75  | 2.778 |                           |               |
| DMRNW_015096263.1:208501 | NW_015096263.1 | 208501 | 209800 | 1300 | 2  | 1.31E-09 | 61  | 4.692 |                           |               |
| DMRNW_015096263.1:215801 | NW_015096263.1 | 215801 | 216600 | 800  | 1  | 3.93E-09 | 14  | 1.75  |                           |               |
| DMRNW_015096263.1:219901 | NW_015096263.1 | 219901 | 221100 | 1200 | 2  | 1.11E-12 | 25  | 2.083 |                           |               |
| DMRNW_015096266.1:112001 | NW_015096266.1 | 112001 | 112400 | 400  | 1  | 2.65E-09 | 20  | 5     | LOC106934325              |               |
| DMRNW_015096270.1:54101  | NW_015096270.1 | 54101  | 54500  | 400  | 1  | 2.46E-08 | 13  | 3.25  |                           |               |
| DMRNW_015096272.1:60001  | NW_015096272.1 | 60001  | 61600  | 1600 | 2  | 2.01E-08 | 19  | 1.188 |                           |               |
| DMRNW_015096276.1:1      | NW_015096276.1 | 1      | 200    | 200  | 2  | 2.14E-08 | 6   | 3     |                           |               |
| DMRNW_015096283.1:83301  | NW_015096283.1 | 83301  | 87200  | 3900 | 2  | 4.33E-11 | 102 | 2.615 | LOC106903253              |               |
| DMRNW_015096283.1:112901 | NW_015096283.1 | 112901 | 115500 | 2600 | 3  | 1.04E-09 | 69  | 2.654 | igf2bp3                   | Transcription |
| DMRNW_015096288.1:40301  | NW_015096288.1 | 40301  | 41900  | 1600 | 1  | 1.03E-08 | 29  | 1.812 |                           |               |
| DMRNW_015096293.1:230901 | NW_015096293.1 | 230901 | 231912 | 1012 | 1  | 4.40E-08 | 58  | 5.731 |                           |               |
| DMRNW_015096302.1:50901  | NW_015096302.1 | 50901  | 51600  | 700  | 1  | 6.34E-08 | 52  | 7.429 |                           |               |
| DMRNW_015096303.1:95201  | NW_015096303.1 | 95201  | 98300  | 3100 | 2  | 9.19E-10 | 92  | 2.968 | LOC106903390;LOC106903394 |               |
| DMRNW_015096303.1:128101 | NW_015096303.1 | 128101 | 129900 | 1800 | 7  | 5.35E-15 | 110 | 6.111 | LOC106903392              |               |
| DMRNW_015096312.1:43101  | NW_015096312.1 | 43101  | 43600  | 500  | 1  | 3.40E-08 | 18  | 3.6   | LOC106903436              |               |
| DMRNW_015096318.1:31801  | NW_015096318.1 | 31801  | 32700  | 900  | 1  | 1.87E-10 | 41  | 4.556 | hectd1                    | Metabolism    |
| DMRNW_015096329.1:7601   | NW_015096329.1 | 7601   | 9000   | 1400 | 3  | 3.93E-12 | 26  | 1.857 |                           |               |
| DMRNW_015096329.1:90601  | NW_015096329.1 | 90601  | 90800  | 200  | 1  | 8.20E-08 | 0   | 0     |                           |               |
| DMRNW_015096329.1:112801 | NW_015096329.1 | 112801 | 115000 | 2200 | 1  | 5.10E-10 | 30  | 1.364 | LOC106903527              |               |
| DMRNW_015096333.1:161101 | NW_015096333.1 | 161101 | 163200 | 2100 | 3  | 8.75E-09 | 55  | 2.619 |                           |               |
| DMRNW_015096335.1:78201  | NW_015096335.1 | 78201  | 81300  | 3100 | 1  | 7.29E-08 | 132 | 4.258 | rhbdl1                    | Protease      |
| DMRNW_015096335.1:85901  | NW_015096335.1 | 85901  | 90000  | 4100 | 2  | 6.26E-15 | 131 | 3.195 | rhbdl1                    | Protease      |
| DMRNW_015096335.1:115401 | NW_015096335.1 | 115401 | 116000 | 600  | 2  | 6.47E-17 | 10  | 1.667 | rhbdl1                    | Protease      |
| DMRNW_015096336.1:92301  | NW_015096336.1 | 92301  | 96200  | 3900 | 1  | 8.04E-08 | 100 | 2.564 |                           |               |
| DMRNW_015096338.1:46601  | NW_015096338.1 | 46601  | 47600  | 1000 | 3  | 1.61E-11 | 40  | 4     | tnk2                      | Signaling     |
| DMRNW_015096353.1:36401  | NW_015096353.1 | 36401  | 37000  | 600  | 1  | 6.06E-09 | 3   | 0.5   | LOC106903720              |               |
| DMRNW_015096355.1:110101 | NW_015096355.1 | 110101 | 112800 | 2700 | 1  | 1.90E-10 | 79  | 2.926 | fbn1                      | Development   |
| DMRNW_015096357.1:127201 | NW_015096357.1 | 127201 | 129600 | 2400 | 1  | 5.88E-08 | 67  | 2.792 |                           |               |
| DMRNW_015096363.1:8101   | NW_015096363.1 | 8101   | 12600  | 4500 | 1  | 1.68E-09 | 110 | 2.444 | LOC106903802              |               |
| DMRNW_015096363.1:98401  | NW_015096363.1 | 98401  | 100600 | 2200 | 1  | 4.89E-10 | 123 | 5.591 | LOC106903798              |               |
| DMRNW_015096370.1:54601  | NW_015096370.1 | 54601  | 56100  | 1500 | 1  | 7.07E-12 | 58  | 3.867 |                           |               |
| DMRNW_015096370.1:88401  | NW_015096370.1 | 88401  | 91700  | 3300 | 2  | 2.73E-09 | 78  | 2.364 | LOC106903842              |               |
| DMRNW_015096384.1:23301  | NW_015096384.1 | 23301  | 25600  | 2300 | 1  | 6.05E-08 | 56  | 2.435 | LOC106903932              |               |
| DMRNW_015096385.1:16401  | NW_015096385.1 | 16401  | 17900  | 1500 | 1  | 2.03E-08 | 14  | 0.933 |                           |               |
| DMRNW_015096388.1:80101  | NW_015096388.1 | 80101  | 82700  | 2600 | 4  | 2.90E-12 | 98  | 3.769 | LOC106903959              |               |
| DMRNW_015096406.1:121901 | NW_015096406.1 | 121901 | 123700 | 1800 | 1  | 5.57E-08 | 60  | 3.333 |                           |               |
| DMRNW_015096411.1:66301  | NW_015096411.1 | 66301  | 67900  | 1600 | 2  | 1.54E-09 | 57  | 3.562 | LOC106904101              |               |
| DMRNW_015096414.1:41301  | NW_015096414.1 | 41301  | 42000  | 700  | 3  | 2.67E-17 | 18  | 2.571 | LOC106904132              |               |
| DMRNW_015096414.1:46701  | NW_015096414.1 | 46701  | 47400  | 700  | 3  | 1.43E-17 | 35  | 5     | LOC106904132              |               |
| DMRNW_015096414.1:58601  | NW_015096414.1 | 58601  | 62900  | 4300 | 1  | 5.10E-10 | 197 | 4.581 | dcul1d3                   | Proteolysis   |
| DMRNW_015096414.1:77601  | NW_015096414.1 | 77601  | 83300  | 5700 | 1  | 6.04E-09 | 358 | 6.281 | kiaa0556                  |               |
| DMRNW_015096418.1:1      | NW_015096418.1 | 1      | 800    | 800  | 2  | 3.84E-14 | 15  | 1.875 |                           |               |
| DMRNW_015096421.1:31001  | NW_015096421.1 | 31001  | 31300  | 300  | 1  | 4.55E-08 | 4   | 1.333 | LOC106904178              |               |
| DMRNW_015096421.1:82801  | NW_015096421.1 | 82801  | 84100  | 1300 | 1  | 5.86E-09 | 20  | 1.538 | LOC106904177              |               |
| DMRNW_015096428.1:65401  | NW_015096428.1 | 65401  | 66100  | 700  | 3  | 5.62E-27 | 19  | 2.714 | LOC106904219;LOC106904222 |               |
| DMRNW_015096429.1:71401  | NW_015096429.1 | 71401  | 72200  | 800  | 1  | 8.92E-11 | 29  | 3.625 |                           |               |
| DMRNW_015096439.1:7101   | NW_015096439.1 | 7101   | 7500   | 400  | 1  | 1.44E-08 | 10  | 2.5   |                           |               |
| DMRNW_015096446.1:12201  | NW_015096446.1 | 12201  | 12400  | 200  | 1  | 4.01E-10 | 3   | 1.5   |                           |               |
| DMRNW_015096449.1:15701  | NW_015096449.1 | 15701  | 16400  | 700  | 3  | 1.48E-20 | 24  | 3.429 |                           |               |
| DMRNW_015096449.1:19801  | NW_015096449.1 | 19801  | 20500  | 700  | 3  | 6.78E-27 | 38  | 5.429 |                           |               |
| DMRNW_015096449.1:101401 | NW_015096449.1 | 101401 | 101700 | 300  | 1  | 2.36E-08 | 15  | 5     |                           |               |
| DMRNW_015096456.1:25801  | NW_015096456.1 | 25801  | 27100  | 1300 | 2  | 1.71E-11 | 40  | 3.077 | LOC106904371              |               |
| DMRNW_015096458.1:98201  | NW_015096458.1 | 98201  | 98500  | 300  | 1  | 2.91E-10 | 1   | 0.333 |                           |               |
| DMRNW_015096475.1:112101 | NW_015096475.1 | 112101 | 115400 | 3300 | 9  | 1.20E-31 | 65  | 1.97  | ppm1e                     | Signaling     |
| DMRNW_015096475.1:151201 | NW_015096475.1 | 151201 | 153300 | 2100 | 5  | 3.43E-10 | 58  | 2.762 | ppm1e                     | Signaling     |
| DMRNW_015096476.1:53601  | NW_015096476.1 | 53601  | 53900  | 300  | 2  | 1.96E-19 | 15  | 5     |                           |               |
| DMRNW_015096476.1:71401  | NW_015096476.1 | 71401  | 71600  | 200  | 2  | 4.65E-17 | 11  | 5.5   |                           |               |
| DMRNW_015096488.1:85401  | NW_015096488.1 | 85401  | 86300  | 900  | 3  | 5.00E-11 | 41  | 4.556 |                           |               |
| DMRNW_015096488.1:123301 | NW_015096488.1 | 123301 | 124900 | 1600 | 1  | 2.03E-09 | 47  | 2.938 | LOC106904532              |               |
| DMRNW_015096493.1:149501 | NW_015096493.1 | 149501 | 149900 | 400  | 1  | 2.71E-09 | 8   | 2     | LOC106904550              |               |
| DMRNW_015096502.1:1      | NW_015096502.1 | 1      | 2800   | 2800 | 2  | 4.71E-08 | 52  | 1.857 |                           |               |
| DMRNW_015096502.1:7401   | NW_015096502.1 | 7401   | 14400  | 7000 | 11 | 1.43E-15 | 129 | 1.843 |                           |               |
| DMRNW_015096507.1:78401  | NW_015096507.1 | 78401  | 79500  | 1100 | 1  | 2.10E-11 | 69  | 6.273 | LOC106904649;plod3        | Metabolism    |
| DMRNW_015096507.1:83001  | NW_015096507.1 | 83001  | 86000  | 3000 | 1  | 4.00E-10 | 110 | 3.667 | LOC106904649;plod3        | Metabolism    |

|                          |                |        |        |      |    |          |     |       |                           |               |
|--------------------------|----------------|--------|--------|------|----|----------|-----|-------|---------------------------|---------------|
| DMRNW_015096507.1:92901  | NW_015096507.1 | 92901  | 94100  | 1200 | 2  | 1.17E-14 | 34  | 2.833 | zhnit1                    | Transcription |
| DMRNW_015096507.1:108601 | NW_015096507.1 | 108601 | 109700 | 1100 | 7  | 3.57E-35 | 14  | 1.273 |                           |               |
| DMRNW_015096507.1:115001 | NW_015096507.1 | 115001 | 116216 | 1216 | 12 | 6.53E-31 | 37  | 3.043 |                           |               |
| DMRNW_015096512.1:16201  | NW_015096512.1 | 16201  | 18300  | 2100 | 2  | 2.72E-12 | 35  | 1.667 | LOC106904663              |               |
| DMRNW_015096515.1:9201   | NW_015096515.1 | 9201   | 11300  | 2100 | 2  | 4.77E-10 | 24  | 1.143 |                           |               |
| DMRNW_015096533.1:13901  | NW_015096533.1 | 13901  | 14500  | 600  | 1  | 5.90E-09 | 14  | 2.333 | rpl30                     | Transcription |
| DMRNW_015096535.1:75101  | NW_015096535.1 | 75101  | 78700  | 3600 | 6  | 5.99E-11 | 73  | 2.028 | LOC106904820              |               |
| DMRNW_015096540.1:12001  | NW_015096540.1 | 12001  | 13300  | 1300 | 1  | 1.45E-09 | 113 | 8.692 | LOC106904835              |               |
| DMRNW_015096540.1:16201  | NW_015096540.1 | 16201  | 18200  | 2000 | 1  | 9.25E-08 | 67  | 3.35  | LOC106904835              |               |
| DMRNW_015096550.1:16001  | NW_015096550.1 | 16001  | 16600  | 600  | 1  | 3.73E-12 | 29  | 4.833 | dcaf11                    | Unknown       |
| DMRNW_015096552.1:58001  | NW_015096552.1 | 58001  | 58200  | 200  | 1  | 2.10E-08 | 6   | 3     | LOC106904910              |               |
| DMRNW_015096561.1:86201  | NW_015096561.1 | 86201  | 88700  | 2500 | 1  | 7.30E-08 | 44  | 1.76  | LOC106904951;LOC106904952 |               |
| DMRNW_015096561.1:174301 | NW_015096561.1 | 174301 | 174700 | 400  | 1  | 2.73E-08 | 19  | 4.75  | LOC106904958              |               |
| DMRNW_015096574.1:26401  | NW_015096574.1 | 26401  | 28100  | 1700 | 1  | 2.38E-10 | 50  | 2.941 |                           |               |
| DMRNW_015096579.1:54701  | NW_015096579.1 | 54701  | 55500  | 800  | 2  | 3.70E-11 | 63  | 7.875 | ddx42                     | Transcription |
| DMRNW_015096590.1:7301   | NW_015096590.1 | 7301   | 7800   | 500  | 2  | 3.09E-12 | 16  | 3.2   | eya2                      | Development   |
| DMRNW_015096591.1:82901  | NW_015096591.1 | 82901  | 83500  | 600  | 1  | 3.54E-10 | 21  | 3.5   | LOC106905124              |               |
| DMRNW_015096591.1:88201  | NW_015096591.1 | 88201  | 89300  | 1100 | 9  | 4.00E-17 | 79  | 7.182 |                           |               |
| DMRNW_015096595.1:5201   | NW_015096595.1 | 5201   | 6300   | 1100 | 1  | 3.28E-12 | 42  | 3.818 |                           |               |
| DMRNW_015096604.1:96701  | NW_015096604.1 | 96701  | 97300  | 600  | 1  | 5.88E-08 | 4   | 0.667 | LOC106905191              |               |
| DMRNW_015096605.1:17101  | NW_015096605.1 | 17101  | 22500  | 5400 | 3  | 2.03E-10 | 121 | 2.241 | LOC106905197              |               |
| DMRNW_015096610.1:74401  | NW_015096610.1 | 74401  | 76300  | 1900 | 2  | 7.59E-10 | 54  | 2.842 |                           |               |
| DMRNW_015096617.1:32001  | NW_015096617.1 | 32001  | 33200  | 1200 | 1  | 1.92E-12 | 24  | 2     | LOC106905274              |               |
| DMRNW_015096620.1:69001  | NW_015096620.1 | 69001  | 71100  | 2100 | 1  | 3.19E-13 | 50  | 2.381 |                           |               |
| DMRNW_015096622.1:38701  | NW_015096622.1 | 38701  | 42200  | 3500 | 1  | 1.40E-09 | 94  | 2.686 | LOC106905296              |               |
| DMRNW_015096628.1:65201  | NW_015096628.1 | 65201  | 69500  | 4300 | 1  | 3.36E-10 | 98  | 2.279 | LOC106905319              |               |
| DMRNW_015096629.1:59501  | NW_015096629.1 | 59501  | 60100  | 600  | 4  | 3.85E-20 | 5   | 0.833 | LOC106905325              |               |
| DMRNW_015096629.1:64201  | NW_015096629.1 | 64201  | 65700  | 1500 | 4  | 2.05E-17 | 27  | 1.8   | LOC106905325              |               |
| DMRNW_015096634.1:82001  | NW_015096634.1 | 82001  | 83600  | 1600 | 1  | 8.37E-08 | 44  | 2.75  | LOC106905363              |               |
| DMRNW_015096634.1:103901 | NW_015096634.1 | 103901 | 106000 | 2100 | 6  | 3.27E-12 | 66  | 3.143 |                           |               |
| DMRNW_015096652.1:7701   | NW_015096652.1 | 7701   | 8000   | 300  | 2  | 1.90E-13 | 7   | 2.333 |                           |               |
| DMRNW_015096652.1:76701  | NW_015096652.1 | 76701  | 79600  | 2900 | 14 | 1.29E-15 | 83  | 2.862 |                           |               |
| DMRNW_015096652.1:151901 | NW_015096652.1 | 151901 | 152100 | 200  | 1  | 7.84E-08 | 3   | 1.5   | LOC106905445              |               |
| DMRNW_015096654.1:5501   | NW_015096654.1 | 5501   | 9600   | 4100 | 1  | 1.01E-10 | 159 | 3.878 | unk                       |               |
| DMRNW_015096662.1:80901  | NW_015096662.1 | 80901  | 88700  | 7800 | 1  | 5.02E-09 | 111 | 1.423 |                           |               |
| DMRNW_015096662.1:97701  | NW_015096662.1 | 97701  | 101400 | 3700 | 4  | 2.40E-22 | 33  | 0.892 |                           |               |
| DMRNW_015096681.1:32301  | NW_015096681.1 | 32301  | 34700  | 2400 | 1  | 3.21E-08 | 69  | 2.875 | LOC106905629              |               |
| DMRNW_015096681.1:39501  | NW_015096681.1 | 39501  | 40700  | 1200 | 1  | 2.73E-09 | 56  | 4.667 | ppp4r4                    |               |
| DMRNW_015096696.1:75301  | NW_015096696.1 | 75301  | 76200  | 900  | 2  | 3.45E-15 | 15  | 1.667 |                           |               |
| DMRNW_015096713.1:48501  | NW_015096713.1 | 48501  | 51700  | 3200 | 1  | 8.96E-08 | 78  | 2.438 |                           |               |
| DMRNW_015096722.1:56101  | NW_015096722.1 | 56101  | 57900  | 1800 | 1  | 2.24E-12 | 46  | 2.556 |                           |               |
| DMRNW_015096722.1:61801  | NW_015096722.1 | 61801  | 63200  | 1400 | 1  | 4.82E-13 | 36  | 2.571 |                           |               |
| DMRNW_015096722.1:68601  | NW_015096722.1 | 68601  | 69400  | 800  | 1  | 2.13E-08 | 39  | 4.875 |                           |               |
| DMRNW_015096722.1:74701  | NW_015096722.1 | 74701  | 76000  | 1300 | 2  | 1.17E-08 | 34  | 2.615 |                           |               |
| DMRNW_015096742.1:74901  | NW_015096742.1 | 74901  | 76000  | 1100 | 1  | 3.67E-08 | 51  | 4.636 | LOC106905869              |               |
| DMRNW_015096745.1:67701  | NW_015096745.1 | 67701  | 68600  | 900  | 1  | 1.83E-08 | 43  | 4.778 | slc8a1                    | Transport     |
| DMRNW_015096747.1:21801  | NW_015096747.1 | 21801  | 23300  | 1500 | 1  | 1.16E-08 | 32  | 2.133 | LOC106905882              |               |
| DMRNW_015096747.1:81301  | NW_015096747.1 | 81301  | 81700  | 400  | 1  | 5.54E-10 | 5   | 1.25  | LOC106905887              |               |
| DMRNW_015096755.1:98001  | NW_015096755.1 | 98001  | 98800  | 800  | 1  | 6.57E-14 | 14  | 1.75  |                           |               |
| DMRNW_015096757.1:23801  | NW_015096757.1 | 23801  | 26700  | 2900 | 1  | 2.10E-08 | 63  | 2.172 |                           |               |
| DMRNW_015096760.1:44701  | NW_015096760.1 | 44701  | 46000  | 1300 | 1  | 4.09E-10 | 38  | 2.923 | LOC106905949              |               |
| DMRNW_015096761.1:61301  | NW_015096761.1 | 61301  | 62500  | 1200 | 2  | 3.73E-08 | 29  | 2.417 |                           |               |
| DMRNW_015096773.1:14101  | NW_015096773.1 | 14101  | 15700  | 1600 | 1  | 5.85E-09 | 144 | 9     | setd1a                    |               |
| DMRNW_015096773.1:20301  | NW_015096773.1 | 20301  | 23600  | 3300 | 2  | 1.11E-08 | 227 | 6.879 | setd1a                    |               |
| DMRNW_015096773.1:81201  | NW_015096773.1 | 81201  | 81800  | 600  | 1  | 5.81E-09 | 28  | 4.667 |                           |               |
| DMRNW_015096775.1:101    | NW_015096775.1 | 101    | 800    | 700  | 2  | 1.07E-09 | 13  | 1.857 |                           |               |
| DMRNW_015096775.1:4701   | NW_015096775.1 | 4701   | 7000   | 2300 | 5  | 1.11E-12 | 53  | 2.304 | LOC106906023              |               |
| DMRNW_015096782.1:42501  | NW_015096782.1 | 42501  | 44100  | 1600 | 1  | 3.03E-08 | 20  | 1.25  |                           |               |
| DMRNW_015096783.1:24801  | NW_015096783.1 | 24801  | 31300  | 6500 | 1  | 6.22E-10 | 123 | 1.892 | tspan1                    | Cytoskeleton  |
| DMRNW_015096809.1:103101 | NW_015096809.1 | 103101 | 103700 | 600  | 1  | 9.45E-08 | 9   | 1.5   |                           |               |
| DMRNW_015096810.1:43901  | NW_015096810.1 | 43901  | 45400  | 1500 | 2  | 3.44E-14 | 20  | 1.333 |                           |               |
| DMRNW_015096816.1:51301  | NW_015096816.1 | 51301  | 51900  | 600  | 1  | 7.87E-09 | 9   | 1.5   | LOC106906222              |               |
| DMRNW_015096816.1:92801  | NW_015096816.1 | 92801  | 94500  | 1700 | 1  | 6.57E-08 | 39  | 2.294 |                           |               |
| DMRNW_015096819.1:67901  | NW_015096819.1 | 67901  | 68200  | 300  | 1  | 2.08E-08 | 5   | 1.667 |                           |               |
| DMRNW_015096819.1:74901  | NW_015096819.1 | 74901  | 76200  | 1300 | 3  | 1.06E-15 | 27  | 2.077 |                           |               |
| DMRNW_015096824.1:90701  | NW_015096824.1 | 90701  | 94900  | 4200 | 1  | 8.57E-10 | 180 | 4.286 |                           |               |
| DMRNW_015096828.1:1      | NW_015096828.1 | 1      | 600    | 600  | 5  | 7.44E-21 | 5   | 0.833 |                           |               |
| DMRNW_015096828.1:10701  | NW_015096828.1 | 10701  | 11900  | 1200 | 2  | 8.47E-12 | 19  | 1.583 |                           |               |
| DMRNW_015096841.1:35301  | NW_015096841.1 | 35301  | 38600  | 3300 | 3  | 1.08E-13 | 90  | 2.727 |                           |               |
| DMRNW_015096841.1:91401  | NW_015096841.1 | 91401  | 93100  | 1700 | 1  | 3.18E-09 | 41  | 2.412 |                           |               |
| DMRNW_015096856.1:13501  | NW_015096856.1 | 13501  | 14400  | 900  | 1  | 5.84E-08 | 21  | 2.333 |                           |               |
| DMRNW_015096856.1:18401  | NW_015096856.1 | 18401  | 19800  | 1400 | 4  | 4.12E-09 | 61  | 4.357 | pcsk9                     | Protease      |
| DMRNW_015096865.1:47301  | NW_015096865.1 | 47301  | 48200  | 900  | 1  | 7.80E-12 | 16  | 1.778 | LOC106906431              |               |
| DMRNW_015096868.1:114201 | NW_015096868.1 | 114201 | 116100 | 1900 | 1  | 3.09E-08 | 67  | 3.526 |                           |               |

|                         |                |       |       |       |   |          |     |       |                           |               |
|-------------------------|----------------|-------|-------|-------|---|----------|-----|-------|---------------------------|---------------|
| DMRNW_015096870.1:84801 | NW_015096870.1 | 84801 | 86200 | 1400  | 6 | 3.23E-13 | 51  | 3.643 | LOC106906450              |               |
| DMRNW_015096895.1:14001 | NW_015096895.1 | 14001 | 16300 | 2300  | 1 | 2.85E-08 | 56  | 2.435 |                           |               |
| DMRNW_015096896.1:87901 | NW_015096896.1 | 87901 | 90800 | 2900  | 4 | 1.82E-12 | 115 | 3.966 |                           |               |
| DMRNW_015096900.1:50501 | NW_015096900.1 | 50501 | 51100 | 600   | 1 | 5.68E-11 | 17  | 2.833 | LOC106906593              |               |
| DMRNW_015096909.1:66301 | NW_015096909.1 | 66301 | 66600 | 300   | 1 | 2.79E-09 | 9   | 3     | LOC106906631;LOC106906632 |               |
| DMRNW_015096915.1:72101 | NW_015096915.1 | 72101 | 75000 | 2900  | 2 | 9.69E-10 | 85  | 2.931 |                           |               |
| DMRNW_015096916.1:47301 | NW_015096916.1 | 47301 | 47900 | 600   | 1 | 2.14E-11 | 11  | 1.833 |                           |               |
| DMRNW_015096916.1:85901 | NW_015096916.1 | 85901 | 87800 | 1900  | 1 | 1.08E-08 | 28  | 1.474 |                           |               |
| DMRNW_015096929.1:75101 | NW_015096929.1 | 75101 | 81100 | 6000  | 3 | 7.99E-12 | 140 | 2.333 | LOC106906729              |               |
| DMRNW_015096943.1:61901 | NW_015096943.1 | 61901 | 65700 | 3800  | 3 | 1.89E-10 | 89  | 2.342 | LOC106906807              |               |
| DMRNW_015096943.1:87701 | NW_015096943.1 | 87701 | 88900 | 1200  | 1 | 1.09E-09 | 33  | 2.75  | LOC106906804              |               |
| DMRNW_015096945.1:33501 | NW_015096945.1 | 33501 | 35500 | 2000  | 2 | 9.52E-10 | 44  | 2.2   | lmb1                      | Cytoskeleton  |
| DMRNW_015096951.1:69601 | NW_015096951.1 | 69601 | 70700 | 1100  | 1 | 9.01E-08 | 10  | 0.909 |                           |               |
| DMRNW_015096971.1:38601 | NW_015096971.1 | 38601 | 39700 | 1100  | 5 | 1.99E-31 | 47  | 4.273 | LOC106906924              |               |
| DMRNW_015096972.1:34401 | NW_015096972.1 | 34401 | 34600 | 200   | 1 | 6.12E-14 | 0   | 0     |                           |               |
| DMRNW_015096982.1:90201 | NW_015096982.1 | 90201 | 91800 | 1600  | 2 | 2.92E-09 | 18  | 1.125 | LOC106906974              |               |
| DMRNW_015096984.1:401   | NW_015096984.1 | 401   | 1100  | 700   | 1 | 7.42E-09 | 15  | 2.143 |                           |               |
| DMRNW_015096992.1:42001 | NW_015096992.1 | 42001 | 45500 | 3500  | 1 | 9.78E-08 | 85  | 2.429 | LOC106907024              |               |
| DMRNW_015097001.1:74001 | NW_015097001.1 | 74001 | 74300 | 300   | 1 | 2.83E-08 | 13  | 4.333 |                           |               |
| DMRNW_015097007.1:13001 | NW_015097007.1 | 13001 | 28900 | 15900 | 1 | 1.05E-09 | 179 | 1.126 | LOC106907080              |               |
| DMRNW_015097007.1:57301 | NW_015097007.1 | 57301 | 59000 | 1700  | 1 | 6.60E-08 | 49  | 2.882 |                           |               |
| DMRNW_015097018.1:3201  | NW_015097018.1 | 3201  | 4500  | 1300  | 1 | 5.91E-10 | 13  | 1     |                           |               |
| DMRNW_015097027.1:70501 | NW_015097027.1 | 70501 | 71500 | 1000  | 3 | 9.63E-10 | 26  | 2.6   |                           |               |
| DMRNW_015097029.1:13501 | NW_015097029.1 | 13501 | 14800 | 1300  | 1 | 2.04E-09 | 29  | 2.231 |                           |               |
| DMRNW_015097029.1:50401 | NW_015097029.1 | 50401 | 51000 | 600   | 3 | 7.15E-13 | 29  | 4.833 |                           |               |
| DMRNW_015097029.1:72001 | NW_015097029.1 | 72001 | 73600 | 1600  | 3 | 1.22E-15 | 31  | 1.938 |                           |               |
| DMRNW_015097031.1:52401 | NW_015097031.1 | 52401 | 54200 | 1800  | 2 | 2.41E-09 | 82  | 4.556 | wdr45b                    |               |
| DMRNW_015097054.1:16301 | NW_015097054.1 | 16301 | 16500 | 200   | 1 | 5.05E-08 | 0   | 0     |                           |               |
| DMRNW_015097057.1:28501 | NW_015097057.1 | 28501 | 30200 | 1700  | 2 | 3.08E-16 | 28  | 1.647 | LOC106907279              |               |
| DMRNW_015097060.1:7401  | NW_015097060.1 | 7401  | 9000  | 1600  | 6 | 1.16E-13 | 53  | 3.312 |                           |               |
| DMRNW_015097063.1:19601 | NW_015097063.1 | 19601 | 21100 | 1500  | 3 | 3.03E-12 | 48  | 3.2   | LOC106907302              |               |
| DMRNW_015097075.1:52501 | NW_015097075.1 | 52501 | 56500 | 4000  | 1 | 9.19E-09 | 75  | 1.875 |                           |               |
| DMRNW_015097079.1:59601 | NW_015097079.1 | 59601 | 61000 | 1400  | 1 | 1.66E-10 | 19  | 1.357 | tp73                      | Transcription |
| DMRNW_015097084.1:36601 | NW_015097084.1 | 36601 | 36800 | 200   | 2 | 8.24E-13 | 15  | 7.5   |                           |               |
| DMRNW_015097089.1:22001 | NW_015097089.1 | 22001 | 23600 | 1600  | 1 | 1.99E-09 | 47  | 2.938 | tfap2e                    | Transcription |
| DMRNW_015097089.1:94101 | NW_015097089.1 | 94101 | 98500 | 4400  | 2 | 2.65E-09 | 182 | 4.136 | LOC106907404              |               |
| DMRNW_015097094.1:79501 | NW_015097094.1 | 79501 | 79800 | 300   | 1 | 4.17E-09 | 8   | 2.667 |                           |               |
| DMRNW_015097098.1:201   | NW_015097098.1 | 201   | 800   | 600   | 1 | 8.19E-09 | 10  | 1.667 |                           |               |
| DMRNW_015097105.1:37901 | NW_015097105.1 | 37901 | 38100 | 200   | 1 | 7.79E-08 | 2   | 1     |                           |               |
| DMRNW_015097134.1:64501 | NW_015097134.1 | 64501 | 67500 | 3000  | 2 | 2.23E-13 | 80  | 2.667 |                           |               |
| DMRNW_015097137.1:26901 | NW_015097137.1 | 26901 | 27900 | 1000  | 1 | 6.28E-08 | 36  | 3.6   |                           |               |
| DMRNW_015097147.1:16001 | NW_015097147.1 | 16001 | 16700 | 700   | 1 | 3.09E-10 | 57  | 8.143 | LOC106907676              |               |
| DMRNW_015097147.1:64001 | NW_015097147.1 | 64001 | 66900 | 2900  | 1 | 2.03E-09 | 89  | 3.069 | gls                       | Metabolism    |
| DMRNW_015097153.1:76501 | NW_015097153.1 | 76501 | 77449 | 949   | 4 | 3.51E-13 | 40  | 4.215 |                           |               |
| DMRNW_015097158.1:18201 | NW_015097158.1 | 18201 | 18600 | 400   | 3 | 1.72E-19 | 2   | 0.5   |                           |               |
| DMRNW_015097159.1:17801 | NW_015097159.1 | 17801 | 18600 | 800   | 2 | 1.19E-15 | 3   | 0.375 |                           |               |
| DMRNW_015097167.1:50701 | NW_015097167.1 | 50701 | 51900 | 1200  | 3 | 1.34E-37 | 12  | 1     | LOC106907760              |               |
| DMRNW_015097169.1:11201 | NW_015097169.1 | 11201 | 12700 | 1500  | 7 | 2.35E-31 | 33  | 2.2   |                           |               |
| DMRNW_015097174.1:88401 | NW_015097174.1 | 88401 | 91600 | 3200  | 1 | 7.39E-12 | 62  | 1.938 | LOC106907808              |               |
| DMRNW_015097177.1:33401 | NW_015097177.1 | 33401 | 36500 | 3100  | 2 | 2.68E-22 | 84  | 2.71  | LOC106907817              |               |
| DMRNW_015097180.1:49801 | NW_015097180.1 | 49801 | 50700 | 900   | 1 | 7.27E-08 | 57  | 6.333 | LOC106907832              |               |
| DMRNW_015097183.1:72701 | NW_015097183.1 | 72701 | 75000 | 2300  | 1 | 5.58E-13 | 32  | 1.391 | LOC106907844              |               |
| DMRNW_015097185.1:6301  | NW_015097185.1 | 6301  | 9600  | 3300  | 2 | 3.13E-11 | 75  | 2.273 | dcdc2                     | Development   |
| DMRNW_015097187.1:8601  | NW_015097187.1 | 8601  | 11100 | 2500  | 1 | 1.54E-08 | 129 | 5.16  | metap1                    | Protease      |
| DMRNW_015097191.1:84601 | NW_015097191.1 | 84601 | 85100 | 500   | 1 | 2.51E-11 | 6   | 1.2   |                           |               |
| DMRNW_015097195.1:1     | NW_015097195.1 | 1     | 700   | 700   | 3 | 2.08E-14 | 21  | 3     |                           |               |
| DMRNW_015097199.1:66301 | NW_015097199.1 | 66301 | 67400 | 1100  | 1 | 7.72E-20 | 26  | 2.364 |                           |               |
| DMRNW_015097200.1:12301 | NW_015097200.1 | 12301 | 13300 | 1000  | 2 | 1.53E-08 | 44  | 4.4   |                           |               |
| DMRNW_015097202.1:17101 | NW_015097202.1 | 17101 | 17500 | 400   | 1 | 1.36E-08 | 9   | 2.25  | LOC106907913              |               |
| DMRNW_015097202.1:21501 | NW_015097202.1 | 21501 | 22700 | 1200  | 1 | 3.01E-10 | 19  | 1.583 | LOC106907913              |               |
| DMRNW_015097206.1:65501 | NW_015097206.1 | 65501 | 70200 | 4700  | 1 | 3.39E-09 | 101 | 2.149 |                           |               |
| DMRNW_015097208.1:1     | NW_015097208.1 | 1     | 600   | 600   | 2 | 6.11E-13 | 17  | 2.833 | LOC106907945              |               |
| DMRNW_015097221.1:65801 | NW_015097221.1 | 65801 | 73700 | 7900  | 1 | 4.49E-08 | 148 | 1.873 |                           |               |
| DMRNW_015097224.1:50301 | NW_015097224.1 | 50301 | 51000 | 700   | 1 | 8.56E-08 | 19  | 2.714 | LOC106908019              |               |
| DMRNW_015097224.1:57401 | NW_015097224.1 | 57401 | 58000 | 600   | 2 | 1.18E-09 | 2   | 0.333 | LOC106908019              |               |
| DMRNW_015097224.1:74901 | NW_015097224.1 | 74901 | 75384 | 484   | 1 | 6.71E-10 | 5   | 1.033 |                           |               |
| DMRNW_015097225.1:54401 | NW_015097225.1 | 54401 | 54600 | 200   | 1 | 8.66E-08 | 12  | 6     | LOC106908023              |               |
| DMRNW_015097226.1:68301 | NW_015097226.1 | 68301 | 69300 | 1000  | 1 | 1.33E-10 | 21  | 2.1   | LOC106908032              |               |
| DMRNW_015097235.1:15901 | NW_015097235.1 | 15901 | 17000 | 1100  | 4 | 1.10E-11 | 106 | 9.636 | LOC106908059              |               |
| DMRNW_015097254.1:37201 | NW_015097254.1 | 37201 | 37500 | 300   | 2 | 2.39E-14 | 7   | 2.333 | LOC106908141;LOC106908140 |               |
| DMRNW_015097254.1:41201 | NW_015097254.1 | 41201 | 44300 | 3100  | 2 | 3.66E-15 | 89  | 2.871 | LOC106908141;LOC106908140 |               |
| DMRNW_015097254.1:48701 | NW_015097254.1 | 48701 | 52900 | 4200  | 9 | 2.14E-17 | 105 | 2.5   | LOC106908141              |               |
| DMRNW_015097254.1:69601 | NW_015097254.1 | 69601 | 72500 | 2900  | 1 | 9.52E-10 | 66  | 2.276 |                           |               |
| DMRNW_015097256.1:1     | NW_015097256.1 | 1     | 1700  | 1700  | 2 | 1.89E-17 | 47  | 2.765 |                           |               |

|                          |                |        |        |       |    |          |     |       |              |               |
|--------------------------|----------------|--------|--------|-------|----|----------|-----|-------|--------------|---------------|
| DMRNW_015097260.1:92501  | NW_015097260.1 | 92501  | 93700  | 1200  | 2  | 2.73E-10 | 61  | 5.083 | LOC106908156 |               |
| DMRNW_015097268.1:19501  | NW_015097268.1 | 19501  | 21100  | 1600  | 2  | 3.76E-10 | 21  | 1.312 | LOC106908184 |               |
| DMRNW_015097269.1:18101  | NW_015097269.1 | 18101  | 21300  | 3200  | 1  | 1.13E-08 | 90  | 2.812 |              |               |
| DMRNW_015097271.1:1      | NW_015097271.1 | 1      | 1100   | 1100  | 2  | 1.32E-08 | 47  | 4.273 | ddx27        | Transcription |
| DMRNW_015097282.1:23701  | NW_015097282.1 | 23701  | 24900  | 1200  | 1  | 3.96E-08 | 42  | 3.5   | LOC106908229 |               |
| DMRNW_015097295.1:601    | NW_015097295.1 | 601    | 4700   | 4100  | 3  | 4.70E-11 | 93  | 2.268 |              |               |
| DMRNW_015097303.1:1      | NW_015097303.1 | 1      | 1300   | 1300  | 2  | 6.29E-09 | 37  | 2.846 |              |               |
| DMRNW_015097309.1:35001  | NW_015097309.1 | 35001  | 38800  | 3800  | 4  | 3.19E-08 | 140 | 3.684 |              |               |
| DMRNW_015097309.1:44901  | NW_015097309.1 | 44901  | 49500  | 4600  | 5  | 1.69E-12 | 111 | 2.413 | LOC106908309 |               |
| DMRNW_015097309.1:54101  | NW_015097309.1 | 54101  | 67200  | 13100 | 11 | 2.48E-28 | 327 | 2.496 |              |               |
| DMRNW_015097310.1:4301   | NW_015097310.1 | 4301   | 6700   | 2400  | 3  | 8.05E-20 | 76  | 3.167 |              |               |
| DMRNW_015097312.1:79001  | NW_015097312.1 | 79001  | 79400  | 400   | 2  | 3.25E-13 | 15  | 3.75  | wdr78        | Cytoskeleton  |
| DMRNW_015097316.1:2301   | NW_015097316.1 | 2301   | 4900   | 2600  | 5  | 5.61E-16 | 59  | 2.269 |              |               |
| DMRNW_015097316.1:19701  | NW_015097316.1 | 19701  | 22700  | 3000  | 1  | 1.49E-11 | 89  | 2.967 | LOC106908342 |               |
| DMRNW_015097324.1:63101  | NW_015097324.1 | 63101  | 64800  | 1700  | 1  | 1.73E-08 | 91  | 5.353 | LOC106908373 |               |
| DMRNW_015097335.1:65801  | NW_015097335.1 | 65801  | 68500  | 2700  | 1  | 7.90E-10 | 112 | 4.148 | LOC106908404 |               |
| DMRNW_015097336.1:23501  | NW_015097336.1 | 23501  | 26400  | 2900  | 2  | 2.49E-11 | 32  | 1.103 | LOC106908409 |               |
| DMRNW_015097343.1:20801  | NW_015097343.1 | 20801  | 33200  | 12400 | 10 | 2.52E-12 | 369 | 2.976 | LOC106908431 |               |
| DMRNW_015097345.1:29701  | NW_015097345.1 | 29701  | 30600  | 900   | 1  | 6.82E-14 | 10  | 1.111 |              |               |
| DMRNW_015097353.1:1      | NW_015097353.1 | 1      | 1300   | 1300  | 1  | 3.44E-15 | 69  | 5.308 | LOC106908469 |               |
| DMRNW_015097353.1:26801  | NW_015097353.1 | 26801  | 27100  | 300   | 2  | 4.07E-28 | 5   | 1.667 | LOC106908470 |               |
| DMRNW_015097356.1:1201   | NW_015097356.1 | 1201   | 3900   | 2700  | 18 | 4.96E-22 | 116 | 4.296 |              |               |
| DMRNW_015097356.1:9701   | NW_015097356.1 | 9701   | 10500  | 800   | 6  | 1.31E-21 | 22  | 2.75  |              |               |
| DMRNW_015097365.1:22101  | NW_015097365.1 | 22101  | 23200  | 1100  | 1  | 9.92E-08 | 38  | 3.455 |              |               |
| DMRNW_015097365.1:24401  | NW_015097365.1 | 24401  | 28300  | 3900  | 3  | 5.45E-20 | 144 | 3.692 | LOC106908515 |               |
| DMRNW_015097365.1:48501  | NW_015097365.1 | 48501  | 51100  | 2600  | 1  | 2.93E-11 | 75  | 2.885 | LOC106908515 |               |
| DMRNW_015097380.1:73501  | NW_015097380.1 | 73501  | 73854  | 354   | 1  | 2.90E-08 | 7   | 1.977 |              |               |
| DMRNW_015097383.1:43301  | NW_015097383.1 | 43301  | 44000  | 700   | 1  | 9.10E-08 | 18  | 2.571 |              |               |
| DMRNW_015097384.1:43201  | NW_015097384.1 | 43201  | 43600  | 400   | 2  | 1.07E-08 | 21  | 5.25  | LOC106908569 |               |
| DMRNW_015097387.1:12701  | NW_015097387.1 | 12701  | 13100  | 400   | 2  | 1.85E-08 | 10  | 2.5   |              |               |
| DMRNW_015097400.1:81301  | NW_015097400.1 | 81301  | 84200  | 2900  | 2  | 5.45E-10 | 83  | 2.862 | LOC106908612 |               |
| DMRNW_015097404.1:32501  | NW_015097404.1 | 32501  | 34400  | 1900  | 2  | 4.93E-21 | 59  | 3.105 | kif1c        | Cytoskeleton  |
| DMRNW_015097408.1:65101  | NW_015097408.1 | 65101  | 65900  | 800   | 1  | 1.90E-08 | 29  | 3.625 |              |               |
| DMRNW_015097417.1:59401  | NW_015097417.1 | 59401  | 59900  | 500   | 1  | 2.28E-08 | 14  | 2.8   | LOC106908680 |               |
| DMRNW_015097418.1:49901  | NW_015097418.1 | 49901  | 50800  | 900   | 7  | 6.53E-15 | 24  | 2.667 | LOC106908689 |               |
| DMRNW_015097420.1:23001  | NW_015097420.1 | 23001  | 28300  | 5300  | 1  | 4.30E-09 | 222 | 4.189 |              |               |
| DMRNW_015097425.1:101    | NW_015097425.1 | 101    | 900    | 800   | 1  | 3.87E-08 | 28  | 3.5   |              |               |
| DMRNW_015097425.1:51801  | NW_015097425.1 | 51801  | 52100  | 300   | 1  | 1.56E-12 | 6   | 2     |              |               |
| DMRNW_015097426.1:67901  | NW_015097426.1 | 67901  | 68100  | 200   | 1  | 5.39E-08 | 20  | 10    | LOC106908710 |               |
| DMRNW_015097433.1:6301   | NW_015097433.1 | 6301   | 7400   | 1100  | 5  | 1.55E-22 | 29  | 2.636 |              |               |
| DMRNW_015097433.1:11801  | NW_015097433.1 | 11801  | 14000  | 2200  | 3  | 7.06E-10 | 36  | 1.636 |              |               |
| DMRNW_015097437.1:61101  | NW_015097437.1 | 61101  | 64100  | 3000  | 1  | 8.24E-08 | 89  | 2.967 | LOC106908745 |               |
| DMRNW_015097438.1:1      | NW_015097438.1 | 1      | 1400   | 1400  | 1  | 3.11E-11 | 39  | 2.786 |              |               |
| DMRNW_015097442.1:26001  | NW_015097442.1 | 26001  | 27500  | 1500  | 2  | 1.04E-11 | 48  | 3.2   | LOC106908768 |               |
| DMRNW_015097444.1:33401  | NW_015097444.1 | 33401  | 33600  | 200   | 1  | 2.96E-08 | 1   | 0.5   | LOC106908773 |               |
| DMRNW_015097449.1:1      | NW_015097449.1 | 1      | 1300   | 1300  | 1  | 5.66E-14 | 38  | 2.923 | LOC106908788 |               |
| DMRNW_015097449.1:135301 | NW_015097449.1 | 135301 | 136200 | 900   | 1  | 3.45E-09 | 17  | 1.889 | cngb1        | Receptor      |
| DMRNW_015097453.1:46601  | NW_015097453.1 | 46601  | 49100  | 2500  | 2  | 4.28E-08 | 65  | 2.6   | LOC106908806 |               |
| DMRNW_015097466.1:33401  | NW_015097466.1 | 33401  | 35100  | 1700  | 1  | 4.83E-13 | 56  | 3.294 |              |               |
| DMRNW_015097487.1:49201  | NW_015097487.1 | 49201  | 51800  | 2600  | 1  | 1.77E-09 | 101 | 3.885 | LOC106908893 |               |
| DMRNW_015097488.1:33201  | NW_015097488.1 | 33201  | 40800  | 7600  | 48 | 3.77E-73 | 118 | 1.553 |              |               |
| DMRNW_015097494.1:114001 | NW_015097494.1 | 114001 | 117000 | 3000  | 2  | 2.66E-12 | 165 | 5.5   | LOC106908912 |               |
| DMRNW_015097507.1:47901  | NW_015097507.1 | 47901  | 48100  | 200   | 2  | 5.85E-12 | 3   | 1.5   |              |               |
| DMRNW_015097534.1:20601  | NW_015097534.1 | 20601  | 21800  | 1200  | 5  | 1.83E-15 | 20  | 1.667 | LOC106909045 |               |
| DMRNW_015097542.1:2101   | NW_015097542.1 | 2101   | 2300   | 200   | 1  | 2.28E-09 | 2   | 1     |              |               |
| DMRNW_015097547.1:21501  | NW_015097547.1 | 21501  | 21900  | 400   | 2  | 6.82E-10 | 19  | 4.75  | tbc1d13      | Signaling     |
| DMRNW_015097558.1:57101  | NW_015097558.1 | 57101  | 58100  | 1000  | 1  | 4.54E-09 | 53  | 5.3   | LOC106909111 |               |
| DMRNW_015097583.1:47801  | NW_015097583.1 | 47801  | 48400  | 600   | 1  | 1.48E-10 | 26  | 4.333 |              |               |
| DMRNW_015097584.1:13501  | NW_015097584.1 | 13501  | 14100  | 600   | 1  | 4.61E-08 | 26  | 4.333 | LOC106909195 |               |
| DMRNW_015097603.1:49801  | NW_015097603.1 | 49801  | 51300  | 1500  | 1  | 4.82E-08 | 43  | 2.867 |              |               |
| DMRNW_015097617.1:43901  | NW_015097617.1 | 43901  | 44700  | 800   | 2  | 1.50E-15 | 7   | 0.875 |              |               |
| DMRNW_015097625.1:27301  | NW_015097625.1 | 27301  | 28000  | 700   | 2  | 2.02E-09 | 11  | 1.571 |              |               |
| DMRNW_015097647.1:91401  | NW_015097647.1 | 91401  | 93000  | 1600  | 1  | 9.33E-08 | 50  | 3.125 |              |               |
| DMRNW_015097650.1:39501  | NW_015097650.1 | 39501  | 44600  | 5100  | 2  | 8.14E-09 | 70  | 1.373 |              |               |
| DMRNW_015097652.1:48601  | NW_015097652.1 | 48601  | 49600  | 1000  | 1  | 4.29E-10 | 0   | 0     |              |               |
| DMRNW_015097652.1:55701  | NW_015097652.1 | 55701  | 55886  | 186   | 2  | 1.55E-09 | 1   | 0.538 |              |               |
| DMRNW_015097654.1:55801  | NW_015097654.1 | 55801  | 56100  | 300   | 1  | 6.70E-09 | 5   | 1.667 |              |               |
| DMRNW_015097678.1:53501  | NW_015097678.1 | 53501  | 54800  | 1300  | 1  | 1.20E-11 | 12  | 0.923 |              |               |
| DMRNW_015097680.1:12901  | NW_015097680.1 | 12901  | 14400  | 1500  | 1  | 1.24E-09 | 82  | 5.467 | LOC106909469 |               |
| DMRNW_015097685.1:43901  | NW_015097685.1 | 43901  | 45200  | 1300  | 1  | 8.04E-08 | 54  | 4.154 | LOC106909478 |               |
| DMRNW_015097687.1:14801  | NW_015097687.1 | 14801  | 15600  | 800   | 1  | 1.89E-12 | 38  | 4.75  | LOC106909486 |               |
| DMRNW_015097694.1:27901  | NW_015097694.1 | 27901  | 28500  | 600   | 2  | 3.89E-15 | 15  | 2.5   |              |               |
| DMRNW_015097711.1:41401  | NW_015097711.1 | 41401  | 42100  | 700   | 2  | 7.77E-11 | 32  | 4.571 |              |               |
| DMRNW_015097717.1:50001  | NW_015097717.1 | 50001  | 52600  | 2600  | 2  | 5.89E-09 | 79  | 3.038 |              |               |

|                         |                |       |       |      |    |          |     |       |                                |             |
|-------------------------|----------------|-------|-------|------|----|----------|-----|-------|--------------------------------|-------------|
| DMRNW_015097744.1:50001 | NW_015097744.1 | 50001 | 52000 | 2000 | 2  | 6.84E-10 | 79  | 3.95  | LOC106909654                   |             |
| DMRNW_015097764.1:1     | NW_015097764.1 | 1     | 600   | 600  | 4  | 7.59E-19 | 32  | 5.333 |                                |             |
| DMRNW_015097766.1:12301 | NW_015097766.1 | 12301 | 16300 | 4000 | 1  | 3.86E-08 | 180 | 4.5   | LOC106909693;LOC106909692      |             |
| DMRNW_015097772.1:36501 | NW_015097772.1 | 36501 | 37200 | 700  | 2  | 3.06E-08 | 29  | 4.143 |                                |             |
| DMRNW_015097775.1:41501 | NW_015097775.1 | 41501 | 42100 | 600  | 2  | 8.33E-11 | 8   | 1.333 |                                |             |
| DMRNW_015097782.1:30601 | NW_015097782.1 | 30601 | 31100 | 500  | 1  | 2.70E-08 | 1   | 0.2   | LOC106909728                   |             |
| DMRNW_015097785.1:101   | NW_015097785.1 | 101   | 2900  | 2800 | 1  | 2.46E-08 | 53  | 1.893 |                                |             |
| DMRNW_015097807.1:2301  | NW_015097807.1 | 2301  | 5400  | 3100 | 1  | 1.26E-10 | 125 | 4.032 | wdr33                          | Unknown     |
| DMRNW_015097818.1:45601 | NW_015097818.1 | 45601 | 47200 | 1600 | 1  | 4.02E-08 | 52  | 3.25  | LOC106909815                   |             |
| DMRNW_015097842.1:18901 | NW_015097842.1 | 18901 | 23600 | 4700 | 14 | 1.88E-17 | 131 | 2.787 | LOC106909861;LOC106909862      |             |
| DMRNW_015097861.1:14601 | NW_015097861.1 | 14601 | 14800 | 200  | 2  | 1.87E-14 | 8   | 4     | LOC106909901                   |             |
| DMRNW_015097866.1:1     | NW_015097866.1 | 1     | 900   | 900  | 1  | 7.44E-15 | 17  | 1.889 |                                |             |
| DMRNW_015097884.1:1     | NW_015097884.1 | 1     | 600   | 600  | 1  | 8.37E-08 | 22  | 3.667 |                                |             |
| DMRNW_015097894.1:6201  | NW_015097894.1 | 6201  | 6900  | 700  | 1  | 1.24E-08 | 23  | 3.286 |                                |             |
| DMRNW_015097894.1:10401 | NW_015097894.1 | 10401 | 13700 | 3300 | 3  | 6.43E-10 | 168 | 5.091 |                                |             |
| DMRNW_015097896.1:37701 | NW_015097896.1 | 37701 | 40800 | 3100 | 1  | 3.35E-08 | 144 | 4.645 | LOC106909977;LOC106909982      |             |
| DMRNW_015097896.1:45401 | NW_015097896.1 | 45401 | 47800 | 2400 | 2  | 1.45E-09 | 73  | 3.042 | LOC106909977;LOC106909982.phf1 | Epigenetic  |
| DMRNW_015097905.1:44101 | NW_015097905.1 | 44101 | 47100 | 3000 | 1  | 1.52E-08 | 40  | 1.333 |                                |             |
| DMRNW_015097910.1:28701 | NW_015097910.1 | 28701 | 29700 | 1000 | 1  | 2.92E-09 | 31  | 3.1   | LOC106910008                   |             |
| DMRNW_015097911.1:23701 | NW_015097911.1 | 23701 | 25400 | 1700 | 2  | 8.67E-11 | 66  | 3.882 | LOC106910013;LOC106910011      |             |
| DMRNW_015097917.1:20301 | NW_015097917.1 | 20301 | 26600 | 6300 | 1  | 2.63E-08 | 129 | 2.048 |                                |             |
| DMRNW_015097917.1:27701 | NW_015097917.1 | 27701 | 29900 | 2200 | 1  | 2.73E-09 | 56  | 2.545 |                                |             |
| DMRNW_015097917.1:39301 | NW_015097917.1 | 39301 | 43200 | 3900 | 6  | 5.54E-19 | 66  | 1.692 |                                |             |
| DMRNW_015097925.1:25001 | NW_015097925.1 | 25001 | 25900 | 900  | 5  | 4.55E-16 | 53  | 5.889 |                                |             |
| DMRNW_015097926.1:46001 | NW_015097926.1 | 46001 | 46200 | 200  | 1  | 8.02E-12 | 9   | 4.5   |                                |             |
| DMRNW_015097942.1:45801 | NW_015097942.1 | 45801 | 46100 | 300  | 1  | 5.76E-08 | 2   | 0.667 |                                |             |
| DMRNW_015097943.1:23501 | NW_015097943.1 | 23501 | 27000 | 3500 | 1  | 1.60E-08 | 152 | 4.343 |                                |             |
| DMRNW_015097943.1:43601 | NW_015097943.1 | 43601 | 44100 | 500  | 2  | 8.59E-16 | 13  | 2.6   |                                |             |
| DMRNW_015097947.1:5101  | NW_015097947.1 | 5101  | 5700  | 600  | 2  | 2.14E-21 | 2   | 0.333 |                                |             |
| DMRNW_015097948.1:32901 | NW_015097948.1 | 32901 | 34800 | 1900 | 1  | 4.15E-09 | 85  | 4.474 | LOC106910102                   |             |
| DMRNW_015097951.1:1     | NW_015097951.1 | 1     | 400   | 400  | 2  | 4.27E-08 | 6   | 1.5   | LOC106910109                   |             |
| DMRNW_015097957.1:1     | NW_015097957.1 | 1     | 4600  | 4600 | 2  | 9.88E-17 | 215 | 4.674 | gpatch1                        |             |
| DMRNW_015097957.1:29101 | NW_015097957.1 | 29101 | 33800 | 4700 | 1  | 1.21E-12 | 206 | 4.383 | wdr88;wdr59                    | Unknown     |
| DMRNW_015097969.1:43501 | NW_015097969.1 | 43501 | 45200 | 1700 | 2  | 8.04E-10 | 67  | 3.941 |                                |             |
| DMRNW_015097981.1:35401 | NW_015097981.1 | 35401 | 35700 | 300  | 1  | 2.73E-08 | 11  | 3.667 |                                |             |
| DMRNW_015097983.1:7901  | NW_015097983.1 | 7901  | 9500  | 1600 | 1  | 4.37E-08 | 22  | 1.375 |                                |             |
| DMRNW_015097990.1:12901 | NW_015097990.1 | 12901 | 14300 | 1400 | 1  | 5.81E-08 | 14  | 1     | LOC106910210                   |             |
| DMRNW_015097990.1:19001 | NW_015097990.1 | 19001 | 23500 | 4500 | 6  | 4.66E-27 | 103 | 2.289 |                                |             |
| DMRNW_015097990.1:26601 | NW_015097990.1 | 26601 | 27700 | 1100 | 6  | 1.58E-10 | 54  | 4.909 |                                |             |
| DMRNW_015098007.1:10501 | NW_015098007.1 | 10501 | 18700 | 8200 | 1  | 4.17E-08 | 456 | 5.561 | pkhd11                         | Development |
| DMRNW_015098018.1:2001  | NW_015098018.1 | 2001  | 4500  | 2500 | 1  | 3.07E-08 | 66  | 2.64  |                                |             |
| DMRNW_015098018.1:26401 | NW_015098018.1 | 26401 | 30200 | 3800 | 5  | 3.80E-12 | 153 | 4.026 |                                |             |
| DMRNW_015098041.1:29301 | NW_015098041.1 | 29301 | 31900 | 2600 | 2  | 6.70E-16 | 72  | 2.769 | LOC106910333                   |             |
| DMRNW_015098043.1:38001 | NW_015098043.1 | 38001 | 41500 | 3500 | 1  | 1.43E-08 | 51  | 1.457 |                                |             |
| DMRNW_015098044.1:24001 | NW_015098044.1 | 24001 | 25800 | 1800 | 1  | 9.71E-09 | 67  | 3.722 |                                |             |
| DMRNW_015098063.1:5001  | NW_015098063.1 | 5001  | 8100  | 3100 | 1  | 6.54E-08 | 79  | 2.548 |                                |             |
| DMRNW_015098063.1:31701 | NW_015098063.1 | 31701 | 32100 | 400  | 3  | 5.60E-10 | 15  | 3.75  | LOC106910384                   |             |
| DMRNW_015098069.1:19301 | NW_015098069.1 | 19301 | 20700 | 1400 | 2  | 3.07E-17 | 64  | 4.571 |                                |             |
| DMRNW_015098085.1:2101  | NW_015098085.1 | 2101  | 7500  | 5400 | 1  | 4.40E-08 | 213 | 3.944 |                                |             |
| DMRNW_015098089.1:1     | NW_015098089.1 | 1     | 400   | 400  | 3  | 3.48E-16 | 9   | 2.25  |                                |             |
| DMRNW_015098093.1:49301 | NW_015098093.1 | 49301 | 51800 | 2500 | 1  | 2.77E-08 | 73  | 2.92  |                                |             |
| DMRNW_015098098.1:9201  | NW_015098098.1 | 9201  | 14200 | 5000 | 2  | 1.51E-09 | 118 | 2.36  | LOC106910464;LOC106910463      |             |
| DMRNW_015098101.1:54801 | NW_015098101.1 | 54801 | 55000 | 200  | 1  | 7.00E-08 | 9   | 4.5   |                                |             |
| DMRNW_015098104.1:41801 | NW_015098104.1 | 41801 | 42100 | 300  | 1  | 1.26E-08 | 12  | 4     |                                |             |
| DMRNW_015098104.1:54101 | NW_015098104.1 | 54101 | 56800 | 2700 | 2  | 4.81E-22 | 56  | 2.074 |                                |             |
| DMRNW_015098112.1:21001 | NW_015098112.1 | 21001 | 22100 | 1100 | 2  | 7.34E-10 | 55  | 5     | LOC106910487                   |             |
| DMRNW_015098112.1:25801 | NW_015098112.1 | 25801 | 30200 | 4400 | 3  | 4.87E-09 | 325 | 7.386 | LOC106910487                   |             |
| DMRNW_015098127.1:1     | NW_015098127.1 | 1     | 400   | 400  | 2  | 9.91E-13 | 7   | 1.75  |                                |             |
| DMRNW_015098130.1:39201 | NW_015098130.1 | 39201 | 40900 | 1700 | 1  | 1.35E-08 | 62  | 3.647 | LOC106910524                   |             |
| DMRNW_015098136.1:14501 | NW_015098136.1 | 14501 | 17100 | 2600 | 1  | 3.36E-08 | 27  | 1.038 |                                |             |
| DMRNW_015098153.1:27301 | NW_015098153.1 | 27301 | 27900 | 600  | 1  | 7.15E-08 | 12  | 2     | LOC106910579                   |             |
| DMRNW_015098164.1:35301 | NW_015098164.1 | 35301 | 36500 | 1200 | 3  | 6.28E-10 | 31  | 2.583 | LOC106910604                   |             |
| DMRNW_015098177.1:32101 | NW_015098177.1 | 32101 | 33000 | 900  | 1  | 2.83E-26 | 18  | 2     |                                |             |
| DMRNW_015098209.1:15301 | NW_015098209.1 | 15301 | 17800 | 2500 | 1  | 8.83E-09 | 52  | 2.08  | LOC106910720                   |             |
| DMRNW_015098217.1:9501  | NW_015098217.1 | 9501  | 12900 | 3400 | 2  | 1.08E-08 | 42  | 1.235 | LOC106910738                   |             |
| DMRNW_015098217.1:18601 | NW_015098217.1 | 18601 | 20000 | 1400 | 3  | 6.51E-15 | 36  | 2.571 | LOC106910738                   |             |
| DMRNW_015098217.1:27201 | NW_015098217.1 | 27201 | 28000 | 800  | 1  | 5.43E-08 | 7   | 0.875 | LOC106910738                   |             |
| DMRNW_015098224.1:48701 | NW_015098224.1 | 48701 | 49400 | 700  | 1  | 8.68E-10 | 24  | 3.429 |                                |             |
| DMRNW_015098230.1:5401  | NW_015098230.1 | 5401  | 6900  | 1500 | 1  | 5.32E-08 | 65  | 4.333 |                                |             |
| DMRNW_015098240.1:52301 | NW_015098240.1 | 52301 | 53100 | 800  | 2  | 1.45E-08 | 24  | 3     | LOC106910784                   |             |
| DMRNW_015098248.1:37701 | NW_015098248.1 | 37701 | 39200 | 1500 | 1  | 1.49E-09 | 29  | 1.933 |                                |             |
| DMRNW_015098248.1:45601 | NW_015098248.1 | 45601 | 47200 | 1600 | 2  | 1.04E-13 | 36  | 2.25  |                                |             |



|                         |                |       |       |      |    |          |     |       |                                 |
|-------------------------|----------------|-------|-------|------|----|----------|-----|-------|---------------------------------|
| DMRNW_015098257.1:17901 | NW_015098257.1 | 17901 | 20000 | 2100 | 1  | 8.75E-09 | 65  | 3.095 | LOC106910825;rbmx2;LOC106910826 |
| DMRNW_015098260.1:1     | NW_015098260.1 | 1     | 1000  | 1000 | 1  | 2.08E-08 | 43  | 4.3   | trnad-guc                       |
| DMRNW_015098273.1:11001 | NW_015098273.1 | 11001 | 18900 | 7900 | 2  | 1.27E-16 | 379 | 4.797 | LOC106910866                    |
| DMRNW_015098276.1:11101 | NW_015098276.1 | 11101 | 11400 | 300  | 1  | 9.71E-09 | 18  | 6     | LOC106910873                    |
| DMRNW_015098281.1:15301 | NW_015098281.1 | 15301 | 15800 | 500  | 1  | 1.29E-09 | 15  | 3     |                                 |
| DMRNW_015098281.1:19401 | NW_015098281.1 | 19401 | 20900 | 1500 | 3  | 8.20E-13 | 31  | 2.067 | LOC106910891                    |
| DMRNW_015098284.1:29701 | NW_015098284.1 | 29701 | 30500 | 800  | 1  | 5.17E-11 | 9   | 1.125 |                                 |
| DMRNW_015098326.1:3201  | NW_015098326.1 | 3201  | 6100  | 2900 | 2  | 3.54E-10 | 71  | 2.448 |                                 |
| DMRNW_015098326.1:17501 | NW_015098326.1 | 17501 | 19700 | 2200 | 2  | 1.73E-08 | 88  | 4     | LOC106910967                    |
| DMRNW_015098326.1:33401 | NW_015098326.1 | 33401 | 35400 | 2000 | 3  | 3.22E-09 | 29  | 1.45  | LOC106910966                    |
| DMRNW_015098326.1:36701 | NW_015098326.1 | 36701 | 39100 | 2400 | 3  | 6.52E-11 | 40  | 1.667 |                                 |
| DMRNW_015098327.1:27701 | NW_015098327.1 | 27701 | 28600 | 900  | 4  | 1.84E-18 | 25  | 2.778 | LOC106910969                    |
| DMRNW_015098329.1:5401  | NW_015098329.1 | 5401  | 8800  | 3400 | 1  | 4.90E-14 | 95  | 2.794 |                                 |
| DMRNW_015098385.1:40001 | NW_015098385.1 | 40001 | 41100 | 1100 | 1  | 8.10E-09 | 16  | 1.455 |                                 |
| DMRNW_015098395.1:12801 | NW_015098395.1 | 12801 | 13800 | 1000 | 3  | 1.08E-13 | 34  | 3.4   | LOC106911071                    |
| DMRNW_015098442.1:28701 | NW_015098442.1 | 28701 | 30200 | 1500 | 1  | 2.80E-08 | 30  | 2     |                                 |
| DMRNW_015098452.1:1     | NW_015098452.1 | 1     | 1700  | 1700 | 1  | 8.83E-10 | 55  | 3.235 |                                 |
| DMRNW_015098509.1:1     | NW_015098509.1 | 1     | 2100  | 2100 | 2  | 7.78E-09 | 22  | 1.048 | LOC106911268                    |
| DMRNW_015098509.1:4801  | NW_015098509.1 | 4801  | 9000  | 4200 | 3  | 4.81E-12 | 160 | 3.81  |                                 |
| DMRNW_015098525.1:15301 | NW_015098525.1 | 15301 | 16300 | 1000 | 4  | 4.17E-10 | 35  | 3.5   |                                 |
| DMRNW_015098532.1:38401 | NW_015098532.1 | 38401 | 39972 | 1572 | 1  | 2.77E-08 | 45  | 2.863 | LOC106911315                    |
| DMRNW_015098534.1:14801 | NW_015098534.1 | 14801 | 16100 | 1300 | 1  | 7.77E-10 | 6   | 0.462 |                                 |
| DMRNW_015098550.1:10301 | NW_015098550.1 | 10301 | 10800 | 500  | 1  | 2.42E-09 | 16  | 3.2   |                                 |
| DMRNW_015098560.1:30301 | NW_015098560.1 | 30301 | 30925 | 625  | 7  | 6.41E-52 | 13  | 2.08  |                                 |
| DMRNW_015098566.1:6501  | NW_015098566.1 | 6501  | 8400  | 1900 | 1  | 2.44E-09 | 39  | 2.053 |                                 |
| DMRNW_015098583.1:4701  | NW_015098583.1 | 4701  | 9400  | 4700 | 1  | 5.68E-12 | 179 | 3.809 | LOC106911420                    |
| DMRNW_015098584.1:33401 | NW_015098584.1 | 33401 | 34883 | 1483 | 2  | 6.09E-09 | 30  | 2.023 |                                 |
| DMRNW_015098586.1:30201 | NW_015098586.1 | 30201 | 30400 | 200  | 1  | 8.87E-08 | 9   | 4.5   |                                 |
| DMRNW_015098605.1:1     | NW_015098605.1 | 1     | 1600  | 1600 | 2  | 5.38E-10 | 38  | 2.375 |                                 |
| DMRNW_015098621.1:14201 | NW_015098621.1 | 14201 | 16000 | 1800 | 2  | 9.68E-14 | 34  | 1.889 |                                 |
| DMRNW_015098621.1:19401 | NW_015098621.1 | 19401 | 20900 | 1500 | 1  | 4.47E-09 | 37  | 2.467 | LOC106911470                    |
| DMRNW_015098621.1:26201 | NW_015098621.1 | 26201 | 26900 | 700  | 4  | 1.52E-17 | 22  | 3.143 | LOC106911470                    |
| DMRNW_015098636.1:1     | NW_015098636.1 | 1     | 400   | 400  | 1  | 7.95E-08 | 13  | 3.25  |                                 |
| DMRNW_015098691.1:16301 | NW_015098691.1 | 16301 | 19300 | 3000 | 1  | 3.73E-08 | 48  | 1.6   | LOC106911568;LOC106911567       |
| DMRNW_015098693.1:27301 | NW_015098693.1 | 27301 | 28300 | 1000 | 1  | 1.03E-08 | 15  | 1.5   |                                 |
| DMRNW_015098753.1:25901 | NW_015098753.1 | 25901 | 27000 | 1100 | 2  | 9.02E-09 | 30  | 2.727 |                                 |
| DMRNW_015098764.1:1301  | NW_015098764.1 | 1301  | 3700  | 2400 | 2  | 6.78E-12 | 51  | 2.125 |                                 |
| DMRNW_015098770.1:7201  | NW_015098770.1 | 7201  | 7700  | 500  | 1  | 5.81E-10 | 6   | 1.2   | LOC106911674                    |
| DMRNW_015098779.1:22001 | NW_015098779.1 | 22001 | 26800 | 4800 | 9  | 2.46E-12 | 293 | 6.104 |                                 |
| DMRNW_015098801.1:31201 | NW_015098801.1 | 31201 | 31700 | 500  | 1  | 5.87E-11 | 19  | 3.8   |                                 |
| DMRNW_015098804.1:10901 | NW_015098804.1 | 10901 | 11300 | 400  | 2  | 1.29E-10 | 7   | 1.75  |                                 |
| DMRNW_015098839.1:101   | NW_015098839.1 | 101   | 1300  | 1200 | 2  | 5.54E-19 | 29  | 2.417 |                                 |
| DMRNW_015098839.1:4801  | NW_015098839.1 | 4801  | 9100  | 4300 | 21 | 1.26E-34 | 124 | 2.884 | LOC106911767                    |
| DMRNW_015098839.1:10101 | NW_015098839.1 | 10101 | 11700 | 1600 | 5  | 2.38E-23 | 56  | 3.5   |                                 |
| DMRNW_015098839.1:16501 | NW_015098839.1 | 16501 | 18900 | 2400 | 6  | 3.67E-10 | 93  | 3.875 |                                 |
| DMRNW_015098839.1:23501 | NW_015098839.1 | 23501 | 25800 | 2300 | 4  | 5.04E-10 | 35  | 1.522 |                                 |
| DMRNW_015098863.1:101   | NW_015098863.1 | 101   | 600   | 500  | 2  | 4.77E-12 | 32  | 6.4   |                                 |
| DMRNW_015098893.1:12101 | NW_015098893.1 | 12101 | 15700 | 3600 | 1  | 2.07E-10 | 114 | 3.167 |                                 |
| DMRNW_015098924.1:14601 | NW_015098924.1 | 14601 | 16900 | 2300 | 5  | 1.35E-16 | 38  | 1.652 | LOC106911878                    |
| DMRNW_015098927.1:15101 | NW_015098927.1 | 15101 | 16800 | 1700 | 1  | 5.32E-09 | 66  | 3.882 |                                 |
| DMRNW_015098929.1:9401  | NW_015098929.1 | 9401  | 10400 | 1000 | 2  | 3.43E-10 | 17  | 1.7   | LOC106911887                    |
| DMRNW_015098943.1:26401 | NW_015098943.1 | 26401 | 27000 | 600  | 1  | 2.13E-09 | 18  | 3     |                                 |
| DMRNW_015098943.1:42601 | NW_015098943.1 | 42601 | 43600 | 1000 | 1  | 7.93E-08 | 31  | 3.1   |                                 |
| DMRNW_015098962.1:1301  | NW_015098962.1 | 1301  | 2800  | 1500 | 2  | 1.21E-15 | 18  | 1.2   | LOC106911929                    |
| DMRNW_015098978.1:21101 | NW_015098978.1 | 21101 | 22400 | 1300 | 1  | 3.57E-10 | 31  | 2.385 |                                 |
| DMRNW_015098982.1:29601 | NW_015098982.1 | 29601 | 37400 | 7800 | 4  | 4.85E-17 | 183 | 2.346 |                                 |
| DMRNW_015099009.1:13701 | NW_015099009.1 | 13701 | 15000 | 1300 | 2  | 1.87E-18 | 31  | 2.385 | LOC106911984                    |
| DMRNW_015099029.1:14101 | NW_015099029.1 | 14101 | 15700 | 1600 | 2  | 2.56E-10 | 61  | 3.812 |                                 |
| DMRNW_015099057.1:6701  | NW_015099057.1 | 6701  | 7100  | 400  | 2  | 9.43E-11 | 19  | 4.75  |                                 |
| DMRNW_015099058.1:11001 | NW_015099058.1 | 11001 | 11400 | 400  | 1  | 7.20E-08 | 4   | 1     | LOC106912034                    |
| DMRNW_015099074.1:201   | NW_015099074.1 | 201   | 900   | 700  | 1  | 4.26E-09 | 10  | 1.429 |                                 |
| DMRNW_015099078.1:2701  | NW_015099078.1 | 2701  | 9800  | 7100 | 12 | 8.28E-15 | 185 | 2.606 |                                 |
| DMRNW_015099088.1:14001 | NW_015099088.1 | 14001 | 14800 | 800  | 1  | 6.34E-09 | 2   | 0.25  |                                 |
| DMRNW_015099088.1:20901 | NW_015099088.1 | 20901 | 22000 | 1100 | 1  | 3.65E-13 | 4   | 0.364 |                                 |
| DMRNW_015099097.1:801   | NW_015099097.1 | 801   | 2700  | 1900 | 2  | 2.50E-18 | 27  | 1.421 |                                 |
| DMRNW_015099156.1:6701  | NW_015099156.1 | 6701  | 7800  | 1100 | 2  | 2.06E-15 | 39  | 3.545 | LOC106912130                    |
| DMRNW_015099178.1:301   | NW_015099178.1 | 301   | 1600  | 1300 | 1  | 4.26E-14 | 21  | 1.615 |                                 |
| DMRNW_015099194.1:17201 | NW_015099194.1 | 17201 | 18600 | 1400 | 2  | 6.15E-11 | 55  | 3.929 |                                 |
| DMRNW_015099232.1:5601  | NW_015099232.1 | 5601  | 6000  | 400  | 1  | 1.09E-08 | 27  | 6.75  | LOC106912221                    |
| DMRNW_015099243.1:11701 | NW_015099243.1 | 11701 | 13500 | 1800 | 2  | 5.48E-16 | 50  | 2.778 | LOC106912238                    |
| DMRNW_015099259.1:201   | NW_015099259.1 | 201   | 1600  | 1400 | 1  | 4.67E-08 | 64  | 4.571 |                                 |
| DMRNW_015099259.1:8401  | NW_015099259.1 | 8401  | 11500 | 3100 | 1  | 1.28E-08 | 154 | 4.968 |                                 |
| DMRNW_015099315.1:27201 | NW_015099315.1 | 27201 | 27450 | 250  | 3  | 1.64E-19 | 14  | 5.6   | trnan-guu                       |
| DMRNW_015099321.1:13801 | NW_015099321.1 | 13801 | 14300 | 500  | 1  | 3.28E-10 | 23  | 4.6   |                                 |

|                         |                |       |       |       |   |          |     |        |                           |
|-------------------------|----------------|-------|-------|-------|---|----------|-----|--------|---------------------------|
| DMRNW_015099325.1:16001 | NW_015099325.1 | 16001 | 17300 | 1300  | 1 | 1.49E-12 | 49  | 3.769  |                           |
| DMRNW_015099332.1:401   | NW_015099332.1 | 401   | 1300  | 900   | 1 | 3.91E-08 | 31  | 3.444  |                           |
| DMRNW_015099332.1:13101 | NW_015099332.1 | 13101 | 17539 | 4439  | 2 | 4.30E-08 | 67  | 1.509  |                           |
| DMRNW_015099349.1:5101  | NW_015099349.1 | 5101  | 6400  | 1300  | 3 | 3.58E-13 | 31  | 2.385  |                           |
| DMRNW_015099354.1:21601 | NW_015099354.1 | 21601 | 24100 | 2500  | 3 | 8.75E-12 | 32  | 1.28   |                           |
| DMRNW_015099368.1:15401 | NW_015099368.1 | 15401 | 16800 | 1400  | 3 | 4.40E-11 | 39  | 2.786  |                           |
| DMRNW_015099381.1:5801  | NW_015099381.1 | 5801  | 11000 | 5200  | 5 | 2.63E-29 | 229 | 4.404  | cfap77;LOC106912394       |
| DMRNW_015099384.1:10901 | NW_015099384.1 | 10901 | 16755 | 5855  | 3 | 1.17E-10 | 98  | 1.674  |                           |
| DMRNW_015099390.1:8901  | NW_015099390.1 | 8901  | 9600  | 700   | 1 | 3.89E-09 | 15  | 2.143  |                           |
| DMRNW_015099392.1:3201  | NW_015099392.1 | 3201  | 4600  | 1400  | 1 | 9.08E-12 | 12  | 0.857  | LOC106912403              |
| DMRNW_015099412.1:12101 | NW_015099412.1 | 12101 | 12800 | 700   | 3 | 2.14E-18 | 29  | 4.143  |                           |
| DMRNW_015099414.1:3701  | NW_015099414.1 | 3701  | 4400  | 700   | 4 | 7.57E-17 | 30  | 4.286  |                           |
| DMRNW_015099445.1:1     | NW_015099445.1 | 1     | 1800  | 1800  | 2 | 2.93E-08 | 88  | 4.889  |                           |
| DMRNW_015099455.1:1701  | NW_015099455.1 | 1701  | 3300  | 1600  | 1 | 8.60E-08 | 36  | 2.25   | LOC106912473              |
| DMRNW_015099485.1:101   | NW_015099485.1 | 101   | 600   | 500   | 3 | 4.48E-15 | 14  | 2.8    |                           |
| DMRNW_015099549.1:14701 | NW_015099549.1 | 14701 | 15142 | 442   | 1 | 1.17E-08 | 14  | 3.167  |                           |
| DMRNW_015099557.1:7101  | NW_015099557.1 | 7101  | 8300  | 1200  | 1 | 2.81E-09 | 26  | 2.167  |                           |
| DMRNW_015099571.1:7601  | NW_015099571.1 | 7601  | 8300  | 700   | 1 | 2.99E-09 | 10  | 1.429  |                           |
| DMRNW_015099575.1:14201 | NW_015099575.1 | 14201 | 14953 | 753   | 1 | 8.02E-10 | 12  | 1.594  |                           |
| DMRNW_015099583.1:10901 | NW_015099583.1 | 10901 | 13900 | 3000  | 1 | 9.74E-08 | 52  | 1.733  | LOC106912572              |
| DMRNW_015099600.1:701   | NW_015099600.1 | 701   | 1300  | 600   | 1 | 2.22E-08 | 28  | 4.667  |                           |
| DMRNW_015099621.1:8201  | NW_015099621.1 | 8201  | 9100  | 900   | 1 | 4.98E-08 | 33  | 3.667  |                           |
| DMRNW_015099622.1:48101 | NW_015099622.1 | 48101 | 53100 | 5000  | 2 | 4.72E-13 | 191 | 3.82   | LOC106912595              |
| DMRNW_015099630.1:20701 | NW_015099630.1 | 20701 | 21100 | 400   | 1 | 6.67E-08 | 24  | 6      |                           |
| DMRNW_015099648.1:6901  | NW_015099648.1 | 6901  | 8200  | 1300  | 1 | 3.36E-08 | 13  | 1      |                           |
| DMRNW_015099651.1:1     | NW_015099651.1 | 1     | 400   | 400   | 2 | 7.05E-12 | 21  | 5.25   |                           |
| DMRNW_015099689.1:2301  | NW_015099689.1 | 2301  | 6100  | 3800  | 3 | 1.86E-11 | 171 | 4.5    |                           |
| DMRNW_015099706.1:5901  | NW_015099706.1 | 5901  | 13100 | 7200  | 1 | 1.52E-12 | 177 | 2.458  |                           |
| DMRNW_015099710.1:5001  | NW_015099710.1 | 5001  | 5800  | 800   | 1 | 3.42E-08 | 26  | 3.25   | LOC106912652              |
| DMRNW_015099717.1:1     | NW_015099717.1 | 1     | 10800 | 10800 | 2 | 8.79E-09 | 481 | 4.454  |                           |
| DMRNW_015099740.1:12601 | NW_015099740.1 | 12601 | 13100 | 500   | 1 | 8.40E-09 | 1   | 0.2    | LOC106912681              |
| DMRNW_015099748.1:1     | NW_015099748.1 | 1     | 700   | 700   | 3 | 1.09E-20 | 35  | 5      |                           |
| DMRNW_015099782.1:6001  | NW_015099782.1 | 6001  | 13100 | 7100  | 4 | 5.11E-10 | 194 | 2.732  |                           |
| DMRNW_015099788.1:7601  | NW_015099788.1 | 7601  | 9400  | 1800  | 1 | 8.42E-08 | 55  | 3.056  | LOC106912706              |
| DMRNW_015099817.1:801   | NW_015099817.1 | 801   | 1200  | 400   | 1 | 2.83E-09 | 8   | 2      | LOC106912727              |
| DMRNW_015099824.1:6301  | NW_015099824.1 | 6301  | 6700  | 400   | 2 | 3.69E-10 | 13  | 3.25   |                           |
| DMRNW_015099825.1:4301  | NW_015099825.1 | 4301  | 6600  | 2300  | 1 | 5.23E-08 | 37  | 1.609  | LOC106912733              |
| DMRNW_015099902.1:1801  | NW_015099902.1 | 1801  | 2900  | 1100  | 9 | 3.01E-27 | 14  | 1.273  | LOC106912802              |
| DMRNW_015099925.1:1     | NW_015099925.1 | 1     | 1600  | 1600  | 2 | 9.13E-18 | 9   | 0.562  |                           |
| DMRNW_015099928.1:17401 | NW_015099928.1 | 17401 | 18298 | 898   | 1 | 4.81E-08 | 41  | 4.566  |                           |
| DMRNW_015099981.1:18201 | NW_015099981.1 | 18201 | 18681 | 481   | 2 | 8.09E-09 | 10  | 2.079  |                           |
| DMRNW_015099992.1:13901 | NW_015099992.1 | 13901 | 14252 | 352   | 2 | 2.42E-23 | 11  | 3.125  |                           |
| DMRNW_015099994.1:9501  | NW_015099994.1 | 9501  | 10091 | 591   | 2 | 1.33E-16 | 19  | 3.215  |                           |
| DMRNW_015100018.1:1001  | NW_015100018.1 | 1001  | 4300  | 3300  | 2 | 1.10E-10 | 65  | 1.97   | LOC106912867              |
| DMRNW_015100024.1:1     | NW_015100024.1 | 1     | 1600  | 1600  | 1 | 1.63E-09 | 38  | 2.375  |                           |
| DMRNW_015100049.1:1     | NW_015100049.1 | 1     | 5600  | 5600  | 1 | 3.10E-09 | 217 | 3.875  | LOC106912894;LOC106912893 |
| DMRNW_015100054.1:501   | NW_015100054.1 | 501   | 1000  | 500   | 2 | 1.13E-13 | 14  | 2.8    |                           |
| DMRNW_015100063.1:8601  | NW_015100063.1 | 8601  | 9696  | 1096  | 4 | 8.67E-21 | 33  | 3.011  |                           |
| DMRNW_015100099.1:401   | NW_015100099.1 | 401   | 700   | 300   | 2 | 7.50E-15 | 5   | 1.667  |                           |
| DMRNW_015100109.1:8601  | NW_015100109.1 | 8601  | 9300  | 700   | 1 | 7.35E-10 | 16  | 2.286  |                           |
| DMRNW_015100116.1:101   | NW_015100116.1 | 101   | 2400  | 2300  | 1 | 8.76E-08 | 37  | 1.609  | LOC106912940;LOC106912939 |
| DMRNW_015100175.1:8401  | NW_015100175.1 | 8401  | 8800  | 400   | 1 | 4.89E-10 | 8   | 2      |                           |
| DMRNW_015100201.1:1     | NW_015100201.1 | 1     | 3000  | 3000  | 3 | 3.90E-14 | 43  | 1.433  |                           |
| DMRNW_015100231.1:101   | NW_015100231.1 | 101   | 4100  | 4000  | 2 | 5.30E-09 | 162 | 4.05   | LOC106912998              |
| DMRNW_015100298.1:14201 | NW_015100298.1 | 14201 | 15700 | 1500  | 2 | 3.33E-15 | 84  | 5.6    | LOC106913027              |
| DMRNW_015100348.1:7701  | NW_015100348.1 | 7701  | 8100  | 400   | 2 | 5.91E-12 | 41  | 10.25  |                           |
| DMRNW_015100366.1:7901  | NW_015100366.1 | 7901  | 8329  | 429   | 3 | 1.52E-10 | 7   | 1.632  |                           |
| DMRNW_015100386.1:7101  | NW_015100386.1 | 7101  | 8257  | 1157  | 1 | 2.76E-09 | 20  | 1.729  |                           |
| DMRNW_015100391.1:101   | NW_015100391.1 | 101   | 1100  | 1000  | 1 | 7.35E-10 | 30  | 3      |                           |
| DMRNW_015100410.1:16401 | NW_015100410.1 | 16401 | 17300 | 900   | 1 | 1.23E-09 | 19  | 2.111  |                           |
| DMRNW_015100415.1:14101 | NW_015100415.1 | 14101 | 16400 | 2300  | 8 | 2.41E-23 | 78  | 3.391  |                           |
| DMRNW_015100420.1:7401  | NW_015100420.1 | 7401  | 8149  | 749   | 3 | 1.39E-14 | 22  | 2.937  |                           |
| DMRNW_015100449.1:7501  | NW_015100449.1 | 7501  | 8099  | 599   | 1 | 1.25E-08 | 11  | 1.836  |                           |
| DMRNW_015100451.1:1     | NW_015100451.1 | 1     | 1500  | 1500  | 3 | 6.15E-15 | 22  | 1.467  |                           |
| DMRNW_015100457.1:7201  | NW_015100457.1 | 7201  | 7900  | 700   | 1 | 8.24E-10 | 13  | 1.857  |                           |
| DMRNW_015100492.1:1     | NW_015100492.1 | 1     | 900   | 900   | 5 | 1.42E-10 | 8   | 0.889  |                           |
| DMRNW_015100492.1:7001  | NW_015100492.1 | 7001  | 8300  | 1300  | 3 | 1.60E-10 | 28  | 2.154  |                           |
| DMRNW_015100509.1:401   | NW_015100509.1 | 401   | 900   | 500   | 4 | 1.93E-11 | 3   | 0.6    | LOC106913083              |
| DMRNW_015100522.1:101   | NW_015100522.1 | 101   | 1200  | 1100  | 1 | 2.95E-10 | 40  | 3.636  | trnal-aag;trnal-cag       |
| DMRNW_015100582.1:7101  | NW_015100582.1 | 7101  | 7800  | 700   | 2 | 1.16E-12 | 31  | 4.429  |                           |
| DMRNW_015100607.1:6301  | NW_015100607.1 | 6301  | 7767  | 1467  | 1 | 1.85E-08 | 12  | 0.818  |                           |
| DMRNW_015100619.1:7101  | NW_015100619.1 | 7101  | 8000  | 900   | 2 | 5.88E-10 | 62  | 6.889  |                           |
| DMRNW_015100622.1:1     | NW_015100622.1 | 1     | 1000  | 1000  | 2 | 2.18E-09 | 21  | 2.1    |                           |
| DMRNW_015100651.1:7001  | NW_015100651.1 | 7001  | 7600  | 600   | 1 | 4.11E-09 | 64  | 10.667 | LOC106913125              |
| DMRNW_015100704.1:6201  | NW_015100704.1 | 6201  | 8000  | 1800  | 1 | 2.91E-08 | 54  | 3      |                           |

|                         |                |       |       |      |   |          |     |       |              |
|-------------------------|----------------|-------|-------|------|---|----------|-----|-------|--------------|
| DMRNW_015100752.1:1     | NW_015100752.1 | 1     | 400   | 400  | 1 | 3.02E-08 | 18  | 4.5   |              |
| DMRNW_015100768.1:6601  | NW_015100768.1 | 6601  | 7400  | 800  | 1 | 2.98E-11 | 19  | 2.375 |              |
| DMRNW_015100791.1:5001  | NW_015100791.1 | 5001  | 5700  | 700  | 1 | 5.05E-08 | 17  | 2.429 | LOC106913153 |
| DMRNW_015100851.1:6501  | NW_015100851.1 | 6501  | 7200  | 700  | 1 | 6.30E-08 | 10  | 1.429 |              |
| DMRNW_015100891.1:1     | NW_015100891.1 | 1     | 500   | 500  | 1 | 1.76E-22 | 10  | 2     |              |
| DMRNW_015100898.1:1     | NW_015100898.1 | 1     | 2300  | 2300 | 4 | 5.18E-16 | 92  | 4     |              |
| DMRNW_015100997.1:4201  | NW_015100997.1 | 4201  | 8670  | 4470 | 7 | 4.23E-16 | 128 | 2.864 |              |
| DMRNW_015101045.1:1     | NW_015101045.1 | 1     | 600   | 600  | 2 | 1.82E-16 | 5   | 0.833 |              |
| DMRNW_015101062.1:1     | NW_015101062.1 | 1     | 2300  | 2300 | 1 | 4.37E-09 | 73  | 3.174 |              |
| DMRNW_015101065.1:2601  | NW_015101065.1 | 2601  | 7400  | 4800 | 1 | 2.07E-11 | 167 | 3.479 | LOC106913260 |
| DMRNW_015101107.1:1601  | NW_015101107.1 | 1601  | 4400  | 2800 | 5 | 5.99E-12 | 47  | 1.679 | LOC106913278 |
| DMRNW_015101144.1:22001 | NW_015101144.1 | 22001 | 22600 | 600  | 4 | 2.57E-10 | 13  | 2.167 |              |
| DMRNW_015101208.1:1     | NW_015101208.1 | 1     | 4100  | 4100 | 2 | 2.76E-08 | 96  | 2.341 |              |
| DMRNW_015101229.1:3801  | NW_015101229.1 | 3801  | 4017  | 217  | 1 | 1.50E-09 | 4   | 1.843 |              |
| DMRNW_015101314.1:301   | NW_015101314.1 | 301   | 2700  | 2400 | 1 | 4.18E-08 | 31  | 1.292 |              |
| DMRNW_015101323.1:1     | NW_015101323.1 | 1     | 3100  | 3100 | 1 | 4.12E-10 | 115 | 3.71  |              |
| DMRNW_015101342.1:101   | NW_015101342.1 | 101   | 3000  | 2900 | 2 | 3.36E-10 | 57  | 1.966 |              |
| DMRNW_015101356.1:101   | NW_015101356.1 | 101   | 3300  | 3200 | 2 | 2.00E-08 | 80  | 2.5   |              |
| DMRNW_015101380.1:601   | NW_015101380.1 | 601   | 3274  | 2674 | 1 | 1.84E-14 | 64  | 2.393 |              |
| DMRNW_015101441.1:201   | NW_015101441.1 | 201   | 2800  | 2600 | 1 | 5.21E-08 | 100 | 3.846 |              |
| DMRNW_015101514.1:201   | NW_015101514.1 | 201   | 2863  | 2663 | 1 | 2.10E-11 | 59  | 2.216 |              |
| DMRNW_015101526.1:1     | NW_015101526.1 | 1     | 2800  | 2800 | 2 | 1.02E-09 | 45  | 1.607 | LOC106913412 |
| DMRNW_015101639.1:1101  | NW_015101639.1 | 1101  | 2523  | 1423 | 2 | 2.80E-09 | 60  | 4.216 |              |
| DMRNW_015101829.1:7701  | NW_015101829.1 | 7701  | 9138  | 1438 | 1 | 1.00E-07 | 43  | 2.99  |              |
| DMRNW_015101845.1:1801  | NW_015101845.1 | 1801  | 2113  | 313  | 1 | 7.94E-09 | 17  | 5.431 |              |
| DMRNW_015101979.1:1     | NW_015101979.1 | 1     | 1200  | 1200 | 1 | 5.79E-10 | 25  | 2.083 |              |
| DMRNW_015102000.1:1     | NW_015102000.1 | 1     | 1900  | 1900 | 1 | 1.42E-12 | 81  | 4.263 |              |
| DMRNW_015102047.1:1     | NW_015102047.1 | 1     | 1855  | 1855 | 2 | 3.39E-08 | 32  | 1.725 |              |
| DMRNW_015102082.1:701   | NW_015102082.1 | 701   | 1700  | 1000 | 1 | 2.10E-08 | 48  | 4.8   |              |
| DMRNW_015102210.1:1     | NW_015102210.1 | 1     | 1700  | 1700 | 7 | 4.67E-17 | 75  | 4.412 |              |
| DMRNW_015102260.1:7101  | NW_015102260.1 | 7101  | 8000  | 900  | 3 | 2.97E-16 | 17  | 1.889 |              |
| DMRNW_015102345.1:1     | NW_015102345.1 | 1     | 1200  | 1200 | 1 | 3.95E-09 | 21  | 1.75  |              |
| DMRNW_015102393.1:1201  | NW_015102393.1 | 1201  | 1567  | 367  | 2 | 1.68E-12 | 6   | 1.635 |              |
| DMRNW_015102455.1:101   | NW_015102455.1 | 101   | 900   | 800  | 2 | 3.96E-11 | 14  | 1.75  |              |
| DMRNW_015102524.1:1     | NW_015102524.1 | 1     | 1486  | 1486 | 3 | 4.09E-12 | 74  | 4.98  |              |
| DMRNW_015102542.1:1101  | NW_015102542.1 | 1101  | 1473  | 373  | 2 | 2.28E-08 | 1   | 0.268 | LOC106913602 |
| DMRNW_015102624.1:401   | NW_015102624.1 | 401   | 1400  | 1000 | 1 | 1.55E-08 | 41  | 4.1   |              |
| DMRNW_015102712.1:1     | NW_015102712.1 | 1     | 1386  | 1386 | 2 | 2.07E-12 | 30  | 2.165 |              |
| DMRNW_015102723.1:201   | NW_015102723.1 | 201   | 900   | 700  | 1 | 6.29E-08 | 19  | 2.714 |              |
| DMRNW_015102739.1:1     | NW_015102739.1 | 1     | 1371  | 1371 | 2 | 3.65E-09 | 49  | 3.574 |              |
| DMRNW_015102824.1:101   | NW_015102824.1 | 101   | 1300  | 1200 | 1 | 2.58E-12 | 52  | 4.333 |              |
| DMRNW_015102979.1:1     | NW_015102979.1 | 1     | 1100  | 1100 | 1 | 3.52E-11 | 66  | 6     |              |
| DMRNW_015103142.1:501   | NW_015103142.1 | 501   | 1200  | 700  | 2 | 1.16E-16 | 11  | 1.571 |              |
| DMRNW_015103182.1:801   | NW_015103182.1 | 801   | 1100  | 300  | 2 | 4.57E-10 | 20  | 6.667 |              |
| DMRNW_015103261.1:301   | NW_015103261.1 | 301   | 900   | 600  | 1 | 5.88E-08 | 5   | 0.833 |              |
| DMRNW_015103297.1:501   | NW_015103297.1 | 501   | 1148  | 648  | 4 | 1.92E-15 | 25  | 3.858 |              |
| DMRNW_015103351.1:101   | NW_015103351.1 | 101   | 1133  | 1033 | 3 | 1.36E-14 | 16  | 1.549 |              |
| DMRNW_015103352.1:1     | NW_015103352.1 | 1     | 1100  | 1100 | 2 | 1.90E-10 | 42  | 3.818 |              |
| DMRNW_015103366.1:401   | NW_015103366.1 | 401   | 1100  | 700  | 4 | 9.22E-16 | 13  | 1.857 |              |
| DMRNW_015103513.1:1     | NW_015103513.1 | 1     | 400   | 400  | 1 | 6.21E-09 | 8   | 2     |              |
| DMRNW_015103562.1:1     | NW_015103562.1 | 1     | 1070  | 1070 | 3 | 8.06E-18 | 21  | 1.963 |              |
| DMRNW_015103583.1:1     | NW_015103583.1 | 1     | 1000  | 1000 | 4 | 3.12E-17 | 18  | 1.8   |              |
| DMRNW_015103716.1:201   | NW_015103716.1 | 201   | 600   | 400  | 1 | 3.75E-10 | 17  | 4.25  |              |
| DMRNW_015103724.1:201   | NW_015103724.1 | 201   | 900   | 700  | 1 | 6.15E-12 | 8   | 1.143 |              |
| DMRNW_015103802.1:1     | NW_015103802.1 | 1     | 800   | 800  | 2 | 1.96E-08 | 27  | 3.375 |              |
| DMRNW_015103842.1:1     | NW_015103842.1 | 1     | 200   | 200  | 1 | 5.54E-12 | 5   | 2.5   |              |
| DMRNW_015103898.1:7201  | NW_015103898.1 | 7201  | 8144  | 944  | 1 | 6.81E-09 | 68  | 7.203 |              |
| DMRNW_015103924.1:101   | NW_015103924.1 | 101   | 900   | 800  | 1 | 7.22E-08 | 22  | 2.75  |              |
| DMRNW_015104102.1:701   | NW_015104102.1 | 701   | 900   | 200  | 1 | 5.40E-10 | 5   | 2.5   |              |
| DMRNW_015104127.1:7001  | NW_015104127.1 | 7001  | 7800  | 800  | 1 | 1.35E-10 | 9   | 1.125 |              |
| DMRNW_015104270.1:1     | NW_015104270.1 | 1     | 500   | 500  | 1 | 2.71E-09 | 30  | 6     |              |
| DMRNW_015104342.1:1     | NW_015104342.1 | 1     | 500   | 500  | 1 | 9.86E-08 | 11  | 2.2   |              |
| DMRNW_015104492.1:1     | NW_015104492.1 | 1     | 800   | 800  | 3 | 4.62E-14 | 21  | 2.625 |              |
| DMRNW_015104590.1:1     | NW_015104590.1 | 1     | 400   | 400  | 1 | 9.31E-08 | 0   | 0     |              |
| DMRNW_015104646.1:201   | NW_015104646.1 | 201   | 600   | 400  | 1 | 5.62E-11 | 18  | 4.5   |              |
| DMRNW_015104719.1:1     | NW_015104719.1 | 1     | 700   | 700  | 2 | 6.28E-14 | 15  | 2.143 |              |
| DMRNW_015104757.1:1     | NW_015104757.1 | 1     | 500   | 500  | 1 | 9.48E-09 | 8   | 1.6   |              |
| DMRNW_015104819.1:201   | NW_015104819.1 | 201   | 772   | 572  | 2 | 5.04E-13 | 20  | 3.497 |              |
| DMRNW_015104827.1:101   | NW_015104827.1 | 101   | 771   | 671  | 1 | 5.63E-16 | 43  | 6.408 |              |
| DMRNW_015104858.1:101   | NW_015104858.1 | 101   | 765   | 665  | 1 | 1.56E-15 | 11  | 1.654 |              |
| DMRNW_015104907.1:1     | NW_015104907.1 | 1     | 400   | 400  | 3 | 2.14E-25 | 1   | 0.25  |              |
| DMRNW_015105017.1:201   | NW_015105017.1 | 201   | 700   | 500  | 1 | 7.45E-10 | 4   | 0.8   |              |
| DMRNW_015105204.1:201   | NW_015105204.1 | 201   | 500   | 300  | 2 | 9.86E-11 | 15  | 5     |              |
| DMRNW_015105218.1:1     | NW_015105218.1 | 1     | 400   | 400  | 1 | 2.84E-10 | 25  | 6.25  |              |
| DMRNW_015105227.1:1     | NW_015105227.1 | 1     | 710   | 710  | 1 | 3.15E-09 | 5   | 0.704 |              |
| DMRNW_015105247.1:201   | NW_015105247.1 | 201   | 700   | 500  | 1 | 6.73E-10 | 20  | 4     |              |

|                       |                |     |     |     |   |          |    |        |  |
|-----------------------|----------------|-----|-----|-----|---|----------|----|--------|--|
| DMRNW_015105262.1:401 | NW_015105262.1 | 401 | 705 | 305 | 1 | 3.03E-09 | 8  | 2.623  |  |
| DMRNW_015105356.1:1   | NW_015105356.1 | 1   | 400 | 400 | 1 | 2.86E-09 | 11 | 2.75   |  |
| DMRNW_015105360.1:1   | NW_015105360.1 | 1   | 600 | 600 | 1 | 2.16E-12 | 20 | 3.333  |  |
| DMRNW_015105365.1:1   | NW_015105365.1 | 1   | 500 | 500 | 3 | 1.31E-14 | 26 | 5.2    |  |
| DMRNW_015105601.1:1   | NW_015105601.1 | 1   | 600 | 600 | 2 | 1.81E-11 | 35 | 5.833  |  |
| DMRNW_015105604.1:1   | NW_015105604.1 | 1   | 664 | 664 | 3 | 6.32E-20 | 8  | 1.205  |  |
| DMRNW_015105641.1:1   | NW_015105641.1 | 1   | 600 | 600 | 1 | 8.84E-08 | 38 | 6.333  |  |
| DMRNW_015105680.1:1   | NW_015105680.1 | 1   | 600 | 600 | 1 | 1.35E-11 | 0  | 0      |  |
| DMRNW_015105746.1:1   | NW_015105746.1 | 1   | 650 | 650 | 5 | 2.40E-57 | 10 | 1.538  |  |
| DMRNW_015105829.1:1   | NW_015105829.1 | 1   | 640 | 640 | 1 | 9.46E-08 | 34 | 5.312  |  |
| DMRNW_015106184.1:1   | NW_015106184.1 | 1   | 400 | 400 | 1 | 2.96E-10 | 4  | 1      |  |
| DMRNW_015106185.1:1   | NW_015106185.1 | 1   | 600 | 600 | 4 | 9.49E-15 | 14 | 2.333  |  |
| DMRNW_015106192.1:1   | NW_015106192.1 | 1   | 500 | 500 | 5 | 4.72E-23 | 10 | 2      |  |
| DMRNW_015106204.1:201 | NW_015106204.1 | 201 | 500 | 300 | 1 | 3.77E-11 | 31 | 10.333 |  |
| DMRNW_015106206.1:1   | NW_015106206.1 | 1   | 599 | 599 | 2 | 3.15E-10 | 22 | 3.673  |  |
| DMRNW_015106360.1:1   | NW_015106360.1 | 1   | 584 | 584 | 4 | 1.65E-12 | 13 | 2.226  |  |
| DMRNW_015106400.1:1   | NW_015106400.1 | 1   | 581 | 581 | 1 | 2.73E-08 | 40 | 6.885  |  |
| DMRNW_015106592.1:101 | NW_015106592.1 | 101 | 565 | 465 | 1 | 8.13E-09 | 1  | 0.215  |  |
| DMRNW_015106750.1:1   | NW_015106750.1 | 1   | 552 | 552 | 4 | 6.14E-32 | 10 | 1.812  |  |
| DMRNW_015106827.1:1   | NW_015106827.1 | 1   | 545 | 545 | 1 | 1.74E-08 | 0  | 0      |  |
| DMRNW_015106934.1:1   | NW_015106934.1 | 1   | 537 | 537 | 2 | 3.07E-11 | 36 | 6.704  |  |
| DMRNW_015106975.1:1   | NW_015106975.1 | 1   | 500 | 500 | 1 | 4.08E-11 | 10 | 2      |  |
| DMRNW_015106994.1:201 | NW_015106994.1 | 201 | 533 | 333 | 1 | 6.12E-08 | 6  | 1.802  |  |
| DMRNW_015107034.1:101 | NW_015107034.1 | 101 | 500 | 400 | 3 | 6.69E-14 | 12 | 3      |  |
| DMRNW_015107132.1:101 | NW_015107132.1 | 101 | 524 | 424 | 1 | 4.44E-10 | 10 | 2.358  |  |
| DMRNW_015107192.1:1   | NW_015107192.1 | 1   | 500 | 500 | 2 | 1.67E-14 | 23 | 4.6    |  |
| DMRNW_015107203.1:1   | NW_015107203.1 | 1   | 500 | 500 | 3 | 1.41E-12 | 12 | 2.4    |  |
| DMRNW_015107252.1:201 | NW_015107252.1 | 201 | 515 | 315 | 1 | 3.37E-10 | 3  | 0.952  |  |
| DMRNW_015107389.1:1   | NW_015107389.1 | 1   | 400 | 400 | 1 | 8.26E-12 | 7  | 1.75   |  |
| DMRNW_015107410.1:1   | NW_015107410.1 | 1   | 500 | 500 | 2 | 5.50E-11 | 11 | 2.2    |  |
| DMRNW_015107442.1:1   | NW_015107442.1 | 1   | 499 | 499 | 1 | 8.05E-09 | 31 | 6.212  |  |
| DMRNW_015107568.1:1   | NW_015107568.1 | 1   | 489 | 489 | 1 | 8.29E-08 | 21 | 4.294  |  |
| DMRNW_015107658.1:1   | NW_015107658.1 | 1   | 200 | 200 | 1 | 7.16E-08 | 5  | 2.5    |  |
| DMRNW_015107680.1:1   | NW_015107680.1 | 1   | 481 | 481 | 2 | 2.59E-18 | 21 | 4.366  |  |
| DMRNW_015107728.1:1   | NW_015107728.1 | 1   | 478 | 478 | 5 | 4.48E-29 | 25 | 5.23   |  |
| DMRNW_015107814.1:1   | NW_015107814.1 | 1   | 400 | 400 | 1 | 3.03E-08 | 10 | 2.5    |  |
| DMRNW_015107963.1:201 | NW_015107963.1 | 201 | 462 | 262 | 2 | 1.72E-20 | 10 | 3.817  |  |
| DMRNW_015108003.1:1   | NW_015108003.1 | 1   | 459 | 459 | 1 | 4.06E-09 | 0  | 0      |  |
| DMRNW_015108097.1:1   | NW_015108097.1 | 1   | 300 | 300 | 1 | 3.50E-09 | 5  | 1.667  |  |
| DMRNW_015108163.1:1   | NW_015108163.1 | 1   | 400 | 400 | 1 | 2.34E-11 | 8  | 2      |  |
| DMRNW_015108209.1:1   | NW_015108209.1 | 1   | 400 | 400 | 2 | 4.00E-09 | 3  | 0.75   |  |
| DMRNW_015108210.1:1   | NW_015108210.1 | 1   | 400 | 400 | 1 | 9.54E-08 | 17 | 4.25   |  |
| DMRNW_015108354.1:1   | NW_015108354.1 | 1   | 300 | 300 | 2 | 3.53E-28 | 19 | 6.333  |  |
| DMRNW_015108374.1:1   | NW_015108374.1 | 1   | 400 | 400 | 1 | 1.28E-08 | 4  | 1      |  |
| DMRNW_015108411.1:1   | NW_015108411.1 | 1   | 300 | 300 | 1 | 9.59E-08 | 4  | 1.333  |  |
| DMRNW_015108419.1:1   | NW_015108419.1 | 1   | 200 | 200 | 1 | 9.43E-09 | 10 | 5      |  |
| DMRNW_015108576.1:1   | NW_015108576.1 | 1   | 400 | 400 | 1 | 2.00E-08 | 0  | 0      |  |
| DMRNW_015108721.1:1   | NW_015108721.1 | 1   | 400 | 400 | 1 | 1.33E-09 | 20 | 5      |  |
| DMRNW_015109193.1:1   | NW_015109193.1 | 1   | 300 | 300 | 1 | 8.65E-08 | 1  | 0.333  |  |
| DMRNW_015109253.1:1   | NW_015109253.1 | 1   | 373 | 373 | 3 | 9.34E-14 | 14 | 3.753  |  |
| DMRNW_015109407.1:1   | NW_015109407.1 | 1   | 364 | 364 | 1 | 6.68E-10 | 0  | 0      |  |
| DMRNW_015109450.1:1   | NW_015109450.1 | 1   | 360 | 360 | 1 | 2.92E-10 | 8  | 2.222  |  |
| DMRNW_015109470.1:1   | NW_015109470.1 | 1   | 300 | 300 | 1 | 6.44E-08 | 12 | 4      |  |
| DMRNW_015109521.1:101 | NW_015109521.1 | 101 | 300 | 200 | 1 | 9.19E-08 | 0  | 0      |  |
| DMRNW_015109627.1:1   | NW_015109627.1 | 1   | 350 | 350 | 2 | 6.81E-11 | 15 | 4.286  |  |
| DMRNW_015109720.1:101 | NW_015109720.1 | 101 | 344 | 244 | 2 | 3.32E-13 | 5  | 2.049  |  |
| DMRNW_015109740.1:1   | NW_015109740.1 | 1   | 300 | 300 | 3 | 4.52E-14 | 9  | 3      |  |
| DMRNW_015109991.1:1   | NW_015109991.1 | 1   | 300 | 300 | 1 | 1.03E-09 | 19 | 6.333  |  |
| DMRNW_015110161.1:1   | NW_015110161.1 | 1   | 318 | 318 | 3 | 1.13E-15 | 10 | 3.145  |  |
| DMRNW_015110589.1:1   | NW_015110589.1 | 1   | 294 | 294 | 1 | 5.64E-08 | 11 | 3.741  |  |
| DMRNW_015110737.1:1   | NW_015110737.1 | 1   | 286 | 286 | 2 | 4.20E-14 | 11 | 3.846  |  |
| DMRNW_015110809.1:1   | NW_015110809.1 | 1   | 282 | 282 | 1 | 8.63E-09 | 18 | 6.383  |  |
| DMRNW_015110865.1:101 | NW_015110865.1 | 101 | 280 | 180 | 1 | 9.52E-09 | 5  | 2.778  |  |
| DMRNW_015111473.1:1   | NW_015111473.1 | 1   | 250 | 250 | 1 | 1.92E-08 | 13 | 5.2    |  |
| DMRNW_015111596.1:1   | NW_015111596.1 | 1   | 243 | 243 | 1 | 7.21E-08 | 11 | 4.527  |  |
| DMRNW_015111732.1:1   | NW_015111732.1 | 1   | 238 | 238 | 1 | 6.84E-08 | 0  | 0      |  |
| DMRNW_015112094.1:1   | NW_015112094.1 | 1   | 222 | 222 | 2 | 1.98E-11 | 1  | 0.45   |  |
| DMRNW_015112256.1:1   | NW_015112256.1 | 1   | 215 | 215 | 1 | 6.29E-14 | 8  | 3.721  |  |
| DMRNW_015112287.1:1   | NW_015112287.1 | 1   | 200 | 200 | 1 | 5.61E-09 | 5  | 2.5    |  |
| DMRNW_015112483.1:1   | NW_015112483.1 | 1   | 205 | 205 | 2 | 9.27E-11 | 4  | 1.951  |  |
| DMRNW_015112580.1:1   | NW_015112580.1 | 1   | 200 | 200 | 1 | 3.03E-08 | 10 | 5      |  |

**Supplemental Table S3**  
**DMR List SML vs NML p<1e-07**

| DMR Name                  | Chr            | Start   | Stop    | Length | # Sig Win | minP     | CpG # | CpG Density | Gene Annotation           | Gene Category |
|---------------------------|----------------|---------|---------|--------|-----------|----------|-------|-------------|---------------------------|---------------|
| DMRNW_015094511.1:390401  | NW_015094511.1 | 390401  | 395200  | 4800   | 1         | 1.01E-08 | 112   | 2.333       |                           |               |
| DMRNW_015094511.1:438201  | NW_015094511.1 | 438201  | 441300  | 3100   | 4         | 7.68E-16 | 65    | 2.097       | hlf                       | Transcription |
| DMRNW_015094511.1:1082901 | NW_015094511.1 | 1082901 | 1083300 | 400    | 1         | 2.79E-08 | 8     | 2           | rbfox3                    |               |
| DMRNW_015094511.1:1218101 | NW_015094511.1 | 1218101 | 1219500 | 1400   | 1         | 8.00E-09 | 75    | 5.357       | rbfox3;LOC106914683       |               |
| DMRNW_015094511.1:1318301 | NW_015094511.1 | 1318301 | 1318800 | 500    | 2         | 7.41E-08 | 27    | 5.4         | LOC106914683;LOC106914401 |               |
| DMRNW_015094512.1:597801  | NW_015094512.1 | 597801  | 601100  | 3300   | 2         | 1.16E-09 | 78    | 2.364       | axl                       | Receptor      |
| DMRNW_015094512.1:968801  | NW_015094512.1 | 968801  | 971200  | 2400   | 1         | 2.50E-14 | 45    | 1.875       | caln1                     | Signaling     |
| DMRNW_015094513.1:68401   | NW_015094513.1 | 68401   | 68900   | 500    | 1         | 3.34E-08 | 3     | 0.6         | LOC106924173;trnai-aau    |               |
| DMRNW_015094514.1:789301  | NW_015094514.1 | 789301  | 790500  | 1200   | 1         | 3.34E-08 | 34    | 2.833       |                           |               |
| DMRNW_015094515.1:402001  | NW_015094515.1 | 402001  | 404400  | 2400   | 1         | 7.55E-08 | 44    | 1.833       | slc22a16                  | Transport     |
| DMRNW_015094515.1:670101  | NW_015094515.1 | 670101  | 671000  | 900    | 2         | 7.41E-12 | 11    | 1.222       |                           |               |
| DMRNW_015094515.1:726201  | NW_015094515.1 | 726201  | 729700  | 3500   | 1         | 4.06E-09 | 80    | 2.286       | tdrp                      |               |
| DMRNW_015094515.1:792001  | NW_015094515.1 | 792001  | 793300  | 1300   | 1         | 1.21E-10 | 31    | 2.385       | nhs1                      |               |
| DMRNW_015094516.1:125701  | NW_015094516.1 | 125701  | 127500  | 1800   | 2         | 1.49E-20 | 19    | 1.056       |                           |               |
| DMRNW_015094516.1:673601  | NW_015094516.1 | 673601  | 673900  | 300    | 1         | 9.37E-08 | 2     | 0.667       | cadm4                     | Receptor      |
| DMRNW_015094521.1:309001  | NW_015094521.1 | 309001  | 309700  | 700    | 1         | 5.36E-11 | 12    | 1.714       | adm2                      |               |
| DMRNW_015094521.1:450001  | NW_015094521.1 | 450001  | 450400  | 400    | 1         | 1.17E-11 | 8     | 2           | LOC106915396              |               |
| DMRNW_015094521.1:662001  | NW_015094521.1 | 662001  | 663100  | 1100   | 4         | 1.73E-10 | 12    | 1.091       | LOC106915557;LOC106915571 |               |
| DMRNW_015094521.1:664301  | NW_015094521.1 | 664301  | 665500  | 1200   | 1         | 1.60E-10 | 20    | 1.667       | LOC106915557;LOC106915575 |               |
| DMRNW_015094522.1:153301  | NW_015094522.1 | 153301  | 154200  | 900    | 1         | 7.41E-11 | 23    | 2.556       | LOC106915761              |               |
| DMRNW_015094522.1:817701  | NW_015094522.1 | 817701  | 818600  | 900    | 1         | 3.53E-10 | 26    | 2.889       | ttc28                     | Unknown       |
| DMRNW_015094523.1:253301  | NW_015094523.1 | 253301  | 253600  | 300    | 2         | 5.12E-18 | 2     | 0.667       |                           |               |
| DMRNW_015094523.1:323101  | NW_015094523.1 | 323101  | 325000  | 1900   | 2         | 4.13E-13 | 39    | 2.053       | LOC106916047              |               |
| DMRNW_015094523.1:344901  | NW_015094523.1 | 344901  | 345200  | 300    | 1         | 1.34E-08 | 12    | 4           |                           |               |
| DMRNW_015094523.1:352401  | NW_015094523.1 | 352401  | 352700  | 300    | 1         | 1.42E-08 | 6     | 2           |                           |               |
| DMRNW_015094523.1:497801  | NW_015094523.1 | 497801  | 498500  | 700    | 1         | 1.64E-14 | 12    | 1.714       | LOC106916238              |               |
| DMRNW_015094523.1:633501  | NW_015094523.1 | 633501  | 637600  | 4100   | 2         | 1.80E-11 | 129   | 3.146       | LOC106916288              |               |
| DMRNW_015094523.1:664701  | NW_015094523.1 | 664701  | 667500  | 2800   | 1         | 9.20E-08 | 46    | 1.643       | LOC106916288              |               |
| DMRNW_015094523.1:682001  | NW_015094523.1 | 682001  | 682300  | 300    | 1         | 2.71E-08 | 3     | 1           | LOC106916288              |               |
| DMRNW_015094523.1:691501  | NW_015094523.1 | 691501  | 692900  | 1400   | 1         | 4.14E-08 | 25    | 1.786       | LOC106916288              |               |
| DMRNW_015094524.1:268101  | NW_015094524.1 | 268101  | 270900  | 2800   | 1         | 1.78E-13 | 31    | 1.107       | LOC106916498              |               |
| DMRNW_015094525.1:709601  | NW_015094525.1 | 709601  | 709800  | 200    | 1         | 9.17E-09 | 15    | 7.5         | LOC106917017              |               |
| DMRNW_015094526.1:36401   | NW_015094526.1 | 36401   | 41400   | 5000   | 1         | 1.06E-08 | 163   | 3.26        | LOC106917146              |               |
| DMRNW_015094526.1:380401  | NW_015094526.1 | 380401  | 385700  | 5300   | 5         | 7.53E-22 | 132   | 2.491       | LOC106917226              |               |
| DMRNW_015094528.1:228501  | NW_015094528.1 | 228501  | 230700  | 2200   | 1         | 6.93E-08 | 45    | 2.045       | lrfn1                     | Cytoskeleton  |
| DMRNW_015094531.1:208201  | NW_015094531.1 | 208201  | 208600  | 400    | 1         | 5.45E-12 | 4     | 1           |                           |               |
| DMRNW_015094531.1:839201  | NW_015094531.1 | 839201  | 841900  | 2700   | 1         | 1.09E-08 | 53    | 1.963       |                           |               |
| DMRNW_015094532.1:719001  | NW_015094532.1 | 719001  | 721600  | 2600   | 1         | 8.38E-10 | 26    | 1           |                           |               |
| DMRNW_015094532.1:889301  | NW_015094532.1 | 889301  | 889700  | 400    | 2         | 1.04E-24 | 9     | 2.25        |                           |               |
| DMRNW_015094532.1:1148201 | NW_015094532.1 | 1148201 | 1149200 | 1000   | 2         | 1.95E-09 | 2     | 0.2         | heg1                      |               |
| DMRNW_015094532.1:1359901 | NW_015094532.1 | 1359901 | 1362100 | 2200   | 1         | 2.00E-09 | 22    | 1           | sh3rf3                    |               |
| DMRNW_015094533.1:62901   | NW_015094533.1 | 62901   | 63300   | 400    | 1         | 7.55E-10 | 7     | 1.75        | LOC106918986              |               |
| DMRNW_015094533.1:218101  | NW_015094533.1 | 218101  | 221000  | 2900   | 1         | 1.47E-10 | 52    | 1.793       | nenf;LOC106919117         | Development   |
| DMRNW_015094533.1:360501  | NW_015094533.1 | 360501  | 361400  | 900    | 1         | 3.67E-08 | 20    | 2.222       | manba                     | Golgi         |
| DMRNW_015094533.1:834301  | NW_015094533.1 | 834301  | 836400  | 2100   | 2         | 1.30E-09 | 111   | 5.286       |                           |               |
| DMRNW_015094535.1:196201  | NW_015094535.1 | 196201  | 198700  | 2500   | 3         | 2.10E-18 | 53    | 2.12        | LOC106920206              |               |
| DMRNW_015094537.1:24401   | NW_015094537.1 | 24401   | 26100   | 1700   | 2         | 5.59E-16 | 28    | 1.647       | LOC106920722              |               |
| DMRNW_015094537.1:474001  | NW_015094537.1 | 474001  | 478900  | 4900   | 1         | 5.68E-10 | 126   | 2.571       |                           |               |
| DMRNW_015094538.1:259201  | NW_015094538.1 | 259201  | 260600  | 1400   | 1         | 1.86E-09 | 25    | 1.786       | LOC106921335              |               |
| DMRNW_015094539.1:340001  | NW_015094539.1 | 340001  | 342400  | 2400   | 2         | 2.22E-09 | 45    | 1.875       | LOC106922193;LOC106922075 |               |
| DMRNW_015094539.1:709901  | NW_015094539.1 | 709901  | 710700  | 800    | 1         | 3.60E-08 | 19    | 2.375       | LOC106921980              |               |
| DMRNW_015094540.1:203001  | NW_015094540.1 | 203001  | 203700  | 700    | 3         | 1.05E-31 | 16    | 2.286       | LOC106922645              |               |
| DMRNW_015094540.1:621101  | NW_015094540.1 | 621101  | 621900  | 800    | 1         | 1.69E-12 | 14    | 1.75        | LOC106922767              |               |
| DMRNW_015094542.1:18401   | NW_015094542.1 | 18401   | 23800   | 5400   | 3         | 1.34E-10 | 62    | 1.148       | LOC106923244              |               |
| DMRNW_015094544.1:518301  | NW_015094544.1 | 518301  | 518900  | 600    | 1         | 9.86E-12 | 13    | 2.167       | scfd2                     | Unknown       |
| DMRNW_015094544.1:574301  | NW_015094544.1 | 574301  | 577200  | 2900   | 1         | 1.35E-08 | 81    | 2.793       | scfd2;LOC106924250        | Unknown       |
| DMRNW_015094545.1:96201   | NW_015094545.1 | 96201   | 96800   | 600    | 1         | 1.52E-09 | 13    | 2.167       |                           |               |
| DMRNW_015094545.1:463901  | NW_015094545.1 | 463901  | 466800  | 2900   | 1         | 8.25E-08 | 72    | 2.483       |                           |               |
| DMRNW_015094545.1:565201  | NW_015094545.1 | 565201  | 568200  | 3000   | 5         | 9.66E-21 | 101   | 3.367       |                           |               |
| DMRNW_015094546.1:286001  | NW_015094546.1 | 286001  | 286500  | 500    | 1         | 1.05E-08 | 9     | 1.8         | LOC106924852              |               |
| DMRNW_015094546.1:778401  | NW_015094546.1 | 778401  | 780200  | 1800   | 1         | 3.66E-09 | 54    | 3           | cacna2d2                  | Transport     |
| DMRNW_015094548.1:584901  | NW_015094548.1 | 584901  | 587900  | 3000   | 3         | 2.44E-43 | 48    | 1.6         | drosha                    | Transcription |
| DMRNW_015094550.1:376301  | NW_015094550.1 | 376301  | 380500  | 4200   | 1         | 9.76E-11 | 106   | 2.524       | snx14                     | Signaling     |
| DMRNW_015094550.1:753101  | NW_015094550.1 | 753101  | 753300  | 200    | 1         | 1.26E-21 | 2     | 1           |                           |               |
| DMRNW_015094553.1:294901  | NW_015094553.1 | 294901  | 296300  | 1400   | 2         | 1.03E-25 | 24    | 1.714       | LOC106927059              |               |

|                          |                |        |        |      |    |          |     |       |                                                  |               |
|--------------------------|----------------|--------|--------|------|----|----------|-----|-------|--------------------------------------------------|---------------|
| DMRNW_015094553.1:642501 | NW_015094553.1 | 642501 | 642800 | 300  | 1  | 4.15E-08 | 2   | 0.667 | LOC106927177                                     |               |
| DMRNW_015094554.1:219201 | NW_015094554.1 | 219201 | 222500 | 3300 | 1  | 7.96E-10 | 69  | 2.091 | magi2                                            | Metabolism    |
| DMRNW_015094554.1:582601 | NW_015094554.1 | 582601 | 584800 | 2200 | 1  | 1.96E-12 | 36  | 1.636 | LOC106927353                                     |               |
| DMRNW_015094554.1:667301 | NW_015094554.1 | 667301 | 669500 | 2200 | 1  | 3.96E-08 | 66  | 3     | LOC106927343                                     |               |
| DMRNW_015094555.1:656901 | NW_015094555.1 | 656901 | 660600 | 3700 | 1  | 2.19E-08 | 68  | 1.838 |                                                  |               |
| DMRNW_015094556.1:656601 | NW_015094556.1 | 656601 | 656800 | 200  | 1  | 3.30E-08 | 2   | 1     |                                                  |               |
| DMRNW_015094562.1:143701 | NW_015094562.1 | 143701 | 144800 | 1100 | 5  | 1.02E-26 | 30  | 2.727 |                                                  |               |
| DMRNW_015094562.1:155601 | NW_015094562.1 | 155601 | 162900 | 7300 | 4  | 6.09E-10 | 134 | 1.836 | LOC106929794;LOC106929787;LOC106929769;trnan-guu |               |
| DMRNW_015094562.1:187301 | NW_015094562.1 | 187301 | 187800 | 500  | 3  | 2.82E-12 | 11  | 2.2   | LOC106929615                                     |               |
| DMRNW_015094563.1:59801  | NW_015094563.1 | 59801  | 60400  | 600  | 1  | 9.98E-08 | 8   | 1.333 | LOC106930124                                     |               |
| DMRNW_015094565.1:646901 | NW_015094565.1 | 646901 | 648100 | 1200 | 2  | 3.08E-12 | 25  | 2.083 | LOC106931261                                     |               |
| DMRNW_015094567.1:488301 | NW_015094567.1 | 488301 | 490900 | 2600 | 10 | 5.84E-17 | 45  | 1.731 | pde10a                                           | Signaling     |
| DMRNW_015094567.1:977201 | NW_015094567.1 | 977201 | 978100 | 900  | 2  | 6.72E-09 | 17  | 1.889 |                                                  |               |
| DMRNW_015094568.1:140801 | NW_015094568.1 | 140801 | 141100 | 300  | 1  | 2.71E-08 | 3   | 1     |                                                  |               |
| DMRNW_015094569.1:57501  | NW_015094569.1 | 57501  | 57800  | 300  | 1  | 5.50E-09 | 7   | 2.333 |                                                  |               |
| DMRNW_015094569.1:332501 | NW_015094569.1 | 332501 | 334100 | 1600 | 1  | 8.74E-08 | 32  | 2     |                                                  |               |
| DMRNW_015094573.1:229701 | NW_015094573.1 | 229701 | 232500 | 2800 | 7  | 3.09E-19 | 38  | 1.357 | LOC106933764                                     |               |
| DMRNW_015094575.1:139301 | NW_015094575.1 | 139301 | 144900 | 5600 | 1  | 3.91E-10 | 141 | 2.518 | slc1a5                                           | Transport     |
| DMRNW_015094575.1:184801 | NW_015094575.1 | 184801 | 186800 | 2000 | 1  | 2.75E-08 | 73  | 3.65  | LOC106934088                                     |               |
| DMRNW_015094575.1:341001 | NW_015094575.1 | 341001 | 343700 | 2700 | 1  | 3.15E-08 | 102 | 3.778 | arhgap35                                         | Signaling     |
| DMRNW_015094576.1:198701 | NW_015094576.1 | 198701 | 199100 | 400  | 1  | 6.95E-08 | 4   | 1     |                                                  |               |
| DMRNW_015094578.1:352201 | NW_015094578.1 | 352201 | 354600 | 2400 | 2  | 1.76E-11 | 20  | 0.833 | ltbp2                                            |               |
| DMRNW_015094579.1:436501 | NW_015094579.1 | 436501 | 438000 | 1500 | 2  | 3.43E-09 | 47  | 3.133 | pgbd5                                            | Epigenetic    |
| DMRNW_015094580.1:98001  | NW_015094580.1 | 98001  | 98800  | 800  | 2  | 1.02E-08 | 9   | 1.125 | LOC106904147                                     |               |
| DMRNW_015094584.1:991201 | NW_015094584.1 | 991201 | 991500 | 300  | 2  | 7.89E-09 | 4   | 1.333 | grm8                                             | Receptor      |
| DMRNW_015094588.1:69801  | NW_015094588.1 | 69801  | 71400  | 1600 | 1  | 1.22E-08 | 16  | 1     |                                                  |               |
| DMRNW_015094590.1:68401  | NW_015094590.1 | 68401  | 68900  | 500  | 2  | 3.28E-12 | 23  | 4.6   | afap1l2;LOC106907472                             | Cytoskeleton  |
| DMRNW_015094590.1:348801 | NW_015094590.1 | 348801 | 349800 | 1000 | 1  | 7.83E-08 | 27  | 2.7   | dnmbp                                            | EST           |
| DMRNW_015094591.1:165101 | NW_015094591.1 | 165101 | 170200 | 5100 | 3  | 4.10E-10 | 113 | 2.216 | LOC106907790;LOC106907796                        |               |
| DMRNW_015094592.1:304301 | NW_015094592.1 | 304301 | 304500 | 200  | 2  | 9.45E-10 | 0   | 0     | vav1                                             |               |
| DMRNW_015094599.1:538701 | NW_015094599.1 | 538701 | 539200 | 500  | 1  | 3.92E-08 | 8   | 1.6   |                                                  |               |
| DMRNW_015094600.1:75001  | NW_015094600.1 | 75001  | 77300  | 2300 | 1  | 2.50E-08 | 41  | 1.783 | LOC106910345                                     |               |
| DMRNW_015094600.1:365401 | NW_015094600.1 | 365401 | 372200 | 6800 | 7  | 4.08E-22 | 117 | 1.721 | LOC106910644;LOC106910635                        |               |
| DMRNW_015094600.1:617101 | NW_015094600.1 | 617101 | 617800 | 700  | 2  | 3.27E-18 | 33  | 4.714 |                                                  |               |
| DMRNW_015094600.1:724701 | NW_015094600.1 | 724701 | 729500 | 4800 | 1  | 6.78E-09 | 63  | 1.312 | LOC106910882                                     |               |
| DMRNW_015094602.1:499301 | NW_015094602.1 | 499301 | 501200 | 1900 | 2  | 5.71E-09 | 24  | 1.263 | tmem121;LOC106911415                             |               |
| DMRNW_015094603.1:44701  | NW_015094603.1 | 44701  | 47800  | 3100 | 1  | 3.88E-08 | 119 | 3.839 | LOC106911494                                     |               |
| DMRNW_015094604.1:335901 | NW_015094604.1 | 335901 | 337300 | 1400 | 2  | 5.81E-11 | 27  | 1.929 |                                                  |               |
| DMRNW_015094605.1:815101 | NW_015094605.1 | 815101 | 815900 | 800  | 1  | 8.69E-08 | 4   | 0.5   |                                                  |               |
| DMRNW_015094607.1:453701 | NW_015094607.1 | 453701 | 459400 | 5700 | 1  | 1.34E-09 | 117 | 2.053 | LOC106912857                                     |               |
| DMRNW_015094608.1:298701 | NW_015094608.1 | 298701 | 299000 | 300  | 1  | 3.48E-08 | 5   | 1.667 |                                                  |               |
| DMRNW_015094611.1:190201 | NW_015094611.1 | 190201 | 190500 | 300  | 1  | 1.21E-08 | 6   | 2     | LOC106913590                                     |               |
| DMRNW_015094611.1:313601 | NW_015094611.1 | 313601 | 313900 | 300  | 1  | 9.98E-09 | 3   | 1     | wdpcp                                            |               |
| DMRNW_015094613.1:140801 | NW_015094613.1 | 140801 | 144400 | 3600 | 1  | 6.87E-09 | 90  | 2.5   | LOC106913902;LOC106913903                        |               |
| DMRNW_015094615.1:101    | NW_015094615.1 | 101    | 1000   | 900  | 1  | 1.38E-08 | 20  | 2.222 |                                                  |               |
| DMRNW_015094615.1:260201 | NW_015094615.1 | 260201 | 263100 | 2900 | 2  | 1.37E-11 | 58  | 2     | LOC106913993                                     |               |
| DMRNW_015094618.1:310601 | NW_015094618.1 | 310601 | 313700 | 3100 | 1  | 3.95E-08 | 72  | 2.323 | grem2                                            |               |
| DMRNW_015094618.1:360901 | NW_015094618.1 | 360901 | 361100 | 200  | 1  | 3.12E-11 | 5   | 2.5   | LOC106914055                                     |               |
| DMRNW_015094619.1:39401  | NW_015094619.1 | 39401  | 39900  | 500  | 2  | 1.56E-16 | 13  | 2.6   |                                                  |               |
| DMRNW_015094619.1:130601 | NW_015094619.1 | 130601 | 132300 | 1700 | 5  | 1.07E-14 | 46  | 2.706 | tom1l2                                           | Transport     |
| DMRNW_015094619.1:232601 | NW_015094619.1 | 232601 | 234900 | 2300 | 1  | 1.78E-08 | 44  | 1.913 |                                                  |               |
| DMRNW_015094620.1:404801 | NW_015094620.1 | 404801 | 407900 | 3100 | 10 | 2.19E-28 | 37  | 1.194 | LOC106914091;LOC106914092                        |               |
| DMRNW_015094621.1:323401 | NW_015094621.1 | 323401 | 324300 | 900  | 1  | 9.33E-11 | 10  | 1.111 | LOC106914131                                     |               |
| DMRNW_015094622.1:63801  | NW_015094622.1 | 63801  | 64400  | 600  | 1  | 2.26E-09 | 6   | 1     | cd3e                                             | Receptor      |
| DMRNW_015094622.1:260601 | NW_015094622.1 | 260601 | 261900 | 1300 | 2  | 1.22E-10 | 29  | 2.231 | mfrp                                             |               |
| DMRNW_015094624.1:260701 | NW_015094624.1 | 260701 | 264300 | 3600 | 1  | 8.67E-08 | 76  | 2.111 | pth1r                                            |               |
| DMRNW_015094625.1:122001 | NW_015094625.1 | 122001 | 123000 | 1000 | 1  | 5.38E-08 | 16  | 1.6   | rnf168                                           |               |
| DMRNW_015094625.1:382401 | NW_015094625.1 | 382401 | 383300 | 900  | 2  | 2.43E-11 | 24  | 2.667 | rnpepl1                                          | Metabolism    |
| DMRNW_015094625.1:386601 | NW_015094625.1 | 386601 | 387700 | 1100 | 2  | 2.98E-09 | 28  | 2.545 | rnpepl1                                          | Metabolism    |
| DMRNW_015094625.1:395101 | NW_015094625.1 | 395101 | 396500 | 1400 | 1  | 1.99E-13 | 32  | 2.286 | dvl3                                             | Signaling     |
| DMRNW_015094628.1:36401  | NW_015094628.1 | 36401  | 36900  | 500  | 1  | 3.75E-08 | 9   | 1.8   |                                                  |               |
| DMRNW_015094628.1:287401 | NW_015094628.1 | 287401 | 287800 | 400  | 1  | 3.81E-08 | 9   | 2.25  | LOC106914397                                     |               |
| DMRNW_015094630.1:94201  | NW_015094630.1 | 94201  | 95000  | 800  | 1  | 1.35E-08 | 3   | 0.375 | atxn1                                            | Transcription |
| DMRNW_015094630.1:250301 | NW_015094630.1 | 250301 | 253000 | 2700 | 2  | 4.31E-09 | 67  | 2.481 | dtbnp1                                           |               |
| DMRNW_015094630.1:312001 | NW_015094630.1 | 312001 | 313900 | 1900 | 1  | 9.10E-08 | 34  | 1.789 | jarid2                                           | Epigenetic    |
| DMRNW_015094630.1:471501 | NW_015094630.1 | 471501 | 472000 | 500  | 1  | 4.22E-09 | 9   | 1.8   |                                                  |               |
| DMRNW_015094631.1:351601 | NW_015094631.1 | 351601 | 355000 | 3400 | 1  | 5.57E-08 | 106 | 3.118 | anks1b                                           | Receptor      |
| DMRNW_015094631.1:430601 | NW_015094631.1 | 430601 | 431400 | 800  | 1  | 1.40E-08 | 9   | 1.125 | anks1b                                           | Receptor      |
| DMRNW_015094633.1:198101 | NW_015094633.1 | 198101 | 199100 | 1000 | 1  | 3.13E-08 | 11  | 1.1   | LOC106914544                                     |               |
| DMRNW_015094635.1:28801  | NW_015094635.1 | 28801  | 29000  | 200  | 2  | 2.76E-11 | 0   | 0     | LOC106914585;LOC106914582                        |               |

|                          |                |        |        |      |    |          |     |       |                              |                      |
|--------------------------|----------------|--------|--------|------|----|----------|-----|-------|------------------------------|----------------------|
| DMRNW_015094635.1:523201 | NW_015094635.1 | 523201 | 524500 | 1300 | 2  | 6.67E-10 | 25  | 1.923 | LOC106914608                 |                      |
| DMRNW_015094636.1:454701 | NW_015094636.1 | 454701 | 454900 | 200  | 2  | 2.52E-11 | 0   | 0     | LOC106914648;ppef1           | Signaling            |
| DMRNW_015094638.1:17201  | NW_015094638.1 | 17201  | 20300  | 3100 | 1  | 6.63E-08 | 30  | 0.968 | LOC106914677                 |                      |
| DMRNW_015094639.1:94001  | NW_015094639.1 | 94001  | 94600  | 600  | 1  | 1.01E-14 | 11  | 1.833 | zfhx4                        | Transcription        |
| DMRNW_015094640.1:175501 | NW_015094640.1 | 175501 | 177800 | 2300 | 1  | 9.38E-13 | 36  | 1.565 | pacsin1                      | Transport            |
| DMRNW_015094640.1:256301 | NW_015094640.1 | 256301 | 257400 | 1100 | 2  | 4.34E-12 | 16  | 1.455 | anks1a                       | Unknown              |
| DMRNW_015094641.1:368701 | NW_015094641.1 | 368701 | 370300 | 1600 | 1  | 2.13E-08 | 19  | 1.188 |                              |                      |
| DMRNW_015094641.1:423701 | NW_015094641.1 | 423701 | 424600 | 900  | 1  | 1.11E-10 | 39  | 4.333 | LOC106914751                 |                      |
| DMRNW_015094641.1:425801 | NW_015094641.1 | 425801 | 430400 | 4600 | 5  | 4.66E-15 | 122 | 2.652 | LOC106914751;LOC106914750    |                      |
| DMRNW_015094642.1:350001 | NW_015094642.1 | 350001 | 354100 | 4100 | 3  | 1.43E-17 | 90  | 2.195 | LOC106914767                 |                      |
| DMRNW_015094649.1:329101 | NW_015094649.1 | 329101 | 329500 | 400  | 1  | 3.11E-08 | 10  | 2.5   | LOC106914938                 |                      |
| DMRNW_015094651.1:85401  | NW_015094651.1 | 85401  | 88900  | 3500 | 1  | 9.98E-09 | 93  | 2.657 | LOC106914978                 |                      |
| DMRNW_015094653.1:56101  | NW_015094653.1 | 56101  | 61600  | 5500 | 1  | 4.37E-09 | 231 | 4.2   | nfib;LOC106915036            | Transcription        |
| DMRNW_015094663.1:227001 | NW_015094663.1 | 227001 | 229600 | 2600 | 2  | 2.01E-14 | 57  | 2.192 |                              |                      |
| DMRNW_015094663.1:276601 | NW_015094663.1 | 276601 | 277500 | 900  | 2  | 9.08E-09 | 29  | 3.222 |                              |                      |
| DMRNW_015094664.1:25001  | NW_015094664.1 | 25001  | 26300  | 1300 | 1  | 8.37E-08 | 13  | 1     |                              |                      |
| DMRNW_015094666.1:89701  | NW_015094666.1 | 89701  | 91600  | 1900 | 1  | 6.95E-08 | 73  | 3.842 | LOC106915314                 |                      |
| DMRNW_015094672.1:420401 | NW_015094672.1 | 420401 | 421900 | 1500 | 1  | 3.26E-09 | 47  | 3.133 | pcdh15                       | Extracellular Matrix |
| DMRNW_015094676.1:166601 | NW_015094676.1 | 166601 | 170400 | 3800 | 1  | 1.42E-09 | 89  | 2.342 | LOC106915543                 |                      |
| DMRNW_015094676.1:486501 | NW_015094676.1 | 486501 | 487000 | 500  | 1  | 9.40E-09 | 14  | 2.8   |                              |                      |
| DMRNW_015094678.1:13601  | NW_015094678.1 | 13601  | 15400  | 1800 | 1  | 2.59E-10 | 35  | 1.944 | rabgap1                      | Signaling            |
| DMRNW_015094678.1:476701 | NW_015094678.1 | 476701 | 480200 | 3500 | 2  | 2.88E-19 | 79  | 2.257 | LOC106915587                 |                      |
| DMRNW_015094680.1:387701 | NW_015094680.1 | 387701 | 388200 | 500  | 4  | 1.39E-16 | 28  | 5.6   | ncmap                        |                      |
| DMRNW_015094680.1:393601 | NW_015094680.1 | 393601 | 395400 | 1800 | 1  | 3.24E-10 | 20  | 1.111 | ncmap                        |                      |
| DMRNW_015094680.1:473401 | NW_015094680.1 | 473401 | 474300 | 900  | 1  | 3.08E-08 | 21  | 2.333 | grhl3                        | Transcription        |
| DMRNW_015094683.1:314101 | NW_015094683.1 | 314101 | 314400 | 300  | 1  | 9.13E-10 | 4   | 1.333 | LOC106915741                 |                      |
| DMRNW_015094684.1:744901 | NW_015094684.1 | 744901 | 753100 | 8200 | 1  | 4.70E-08 | 116 | 1.415 |                              |                      |
| DMRNW_015094686.1:225301 | NW_015094686.1 | 225301 | 227100 | 1800 | 1  | 2.35E-08 | 52  | 2.889 | LOC106915818                 |                      |
| DMRNW_015094688.1:171701 | NW_015094688.1 | 171701 | 172900 | 1200 | 1  | 1.53E-09 | 54  | 4.5   |                              |                      |
| DMRNW_015094688.1:613301 | NW_015094688.1 | 613301 | 614300 | 1000 | 1  | 5.75E-10 | 29  | 2.9   | auts2                        | Development          |
| DMRNW_015094690.1:254401 | NW_015094690.1 | 254401 | 255300 | 900  | 3  | 5.39E-24 | 57  | 6.333 | LOC106915865                 |                      |
| DMRNW_015094691.1:49901  | NW_015094691.1 | 49901  | 51500  | 1600 | 4  | 1.74E-13 | 18  | 1.125 |                              |                      |
| DMRNW_015094691.1:57401  | NW_015094691.1 | 57401  | 62900  | 5500 | 13 | 9.80E-21 | 77  | 1.4   |                              |                      |
| DMRNW_015094692.1:195901 | NW_015094692.1 | 195901 | 197200 | 1300 | 3  | 7.14E-27 | 22  | 1.692 | ufm1                         | Proteolysis          |
| DMRNW_015094692.1:375501 | NW_015094692.1 | 375501 | 377900 | 2400 | 1  | 1.87E-10 | 22  | 0.917 |                              |                      |
| DMRNW_015094693.1:466901 | NW_015094693.1 | 466901 | 471200 | 4300 | 1  | 7.21E-10 | 152 | 3.535 | LOC106915978                 |                      |
| DMRNW_015094693.1:697901 | NW_015094693.1 | 697901 | 701800 | 3900 | 2  | 7.55E-13 | 123 | 3.154 | LOC106915994                 |                      |
| DMRNW_015094694.1:134201 | NW_015094694.1 | 134201 | 136500 | 2300 | 2  | 4.36E-20 | 51  | 2.217 | rreb1                        | Signaling            |
| DMRNW_015094694.1:147201 | NW_015094694.1 | 147201 | 147900 | 700  | 1  | 3.52E-08 | 16  | 2.286 | rreb1                        | Signaling            |
| DMRNW_015094694.1:383201 | NW_015094694.1 | 383201 | 384200 | 1000 | 1  | 2.81E-17 | 52  | 5.2   | LOC106916028                 |                      |
| DMRNW_015094694.1:444101 | NW_015094694.1 | 444101 | 445100 | 1000 | 2  | 2.78E-11 | 30  | 3     | LOC106916029                 |                      |
| DMRNW_015094696.1:150201 | NW_015094696.1 | 150201 | 152000 | 1800 | 1  | 9.98E-09 | 24  | 1.333 | sspn                         | Development          |
| DMRNW_015094696.1:334901 | NW_015094696.1 | 334901 | 336900 | 2000 | 8  | 9.51E-11 | 97  | 4.85  |                              |                      |
| DMRNW_015094696.1:339901 | NW_015094696.1 | 339901 | 342300 | 2400 | 2  | 3.71E-10 | 54  | 2.25  |                              |                      |
| DMRNW_015094698.1:446601 | NW_015094698.1 | 446601 | 451500 | 4900 | 1  | 8.35E-08 | 63  | 1.286 | LOC106916106;LOC106916112;tm | Unknown              |
| DMRNW_015094699.1:416501 | NW_015094699.1 | 416501 | 417000 | 500  | 2  | 4.55E-12 | 27  | 5.4   | LOC106916141;LOC106916151    |                      |
| DMRNW_015094702.1:18001  | NW_015094702.1 | 18001  | 19300  | 1300 | 1  | 1.87E-08 | 14  | 1.077 |                              |                      |
| DMRNW_015094702.1:166901 | NW_015094702.1 | 166901 | 169400 | 2500 | 1  | 4.85E-11 | 30  | 1.2   | prkci                        | Signaling            |
| DMRNW_015094702.1:285001 | NW_015094702.1 | 285001 | 285600 | 600  | 1  | 4.16E-08 | 28  | 4.667 | LOC106916198                 |                      |
| DMRNW_015094703.1:205101 | NW_015094703.1 | 205101 | 206400 | 1300 | 1  | 8.95E-12 | 32  | 2.462 | arsb                         | Metabolism           |
| DMRNW_015094704.1:31301  | NW_015094704.1 | 31301  | 33000  | 1700 | 2  | 2.40E-09 | 53  | 3.118 |                              |                      |
| DMRNW_015094707.1:61201  | NW_015094707.1 | 61201  | 66200  | 5000 | 2  | 9.12E-09 | 69  | 1.38  | LOC106916302                 |                      |
| DMRNW_015094708.1:317501 | NW_015094708.1 | 317501 | 320100 | 2600 | 1  | 3.08E-08 | 25  | 0.962 | LOC106916333                 |                      |
| DMRNW_015094712.1:214201 | NW_015094712.1 | 214201 | 216000 | 1800 | 1  | 1.54E-08 | 45  | 2.5   |                              |                      |
| DMRNW_015094714.1:411701 | NW_015094714.1 | 411701 | 414100 | 2400 | 2  | 2.94E-10 | 61  | 2.542 | LOC106916478                 |                      |
| DMRNW_015094714.1:418901 | NW_015094714.1 | 418901 | 420800 | 1900 | 5  | 8.52E-23 | 52  | 2.737 |                              |                      |
| DMRNW_015094719.1:404701 | NW_015094719.1 | 404701 | 406300 | 1600 | 1  | 1.33E-08 | 22  | 1.375 | plxna4                       | Receptor             |
| DMRNW_015094721.1:299301 | NW_015094721.1 | 299301 | 299700 | 400  | 1  | 4.30E-11 | 8   | 2     | LOC106916610                 |                      |
| DMRNW_015094721.1:852401 | NW_015094721.1 | 852401 | 852600 | 200  | 2  | 2.06E-09 | 4   | 2     | LOC106916635                 |                      |
| DMRNW_015094723.1:340701 | NW_015094723.1 | 340701 | 342500 | 1800 | 1  | 7.67E-08 | 38  | 2.111 | lrch2                        | Unknown              |
| DMRNW_015094725.1:285801 | NW_015094725.1 | 285801 | 288400 | 2600 | 1  | 4.37E-08 | 55  | 2.115 | ppp2ca                       | Signaling            |
| DMRNW_015094725.1:349101 | NW_015094725.1 | 349101 | 349600 | 500  | 1  | 3.14E-13 | 1   | 0.2   | tcf7                         | Transcription        |
| DMRNW_015094729.1:223201 | NW_015094729.1 | 223201 | 225500 | 2300 | 1  | 2.89E-08 | 53  | 2.304 |                              |                      |
| DMRNW_015094729.1:237901 | NW_015094729.1 | 237901 | 238700 | 800  | 1  | 2.10E-08 | 20  | 2.5   |                              |                      |
| DMRNW_015094729.1:338601 | NW_015094729.1 | 338601 | 338900 | 300  | 1  | 4.57E-08 | 10  | 3.333 |                              |                      |
| DMRNW_015094729.1:346501 | NW_015094729.1 | 346501 | 351200 | 4700 | 2  | 8.59E-09 | 127 | 2.702 | LOC106916757                 |                      |
| DMRNW_015094729.1:457201 | NW_015094729.1 | 457201 | 457400 | 200  | 1  | 2.81E-08 | 4   | 2     | LOC106916758                 |                      |
| DMRNW_015094730.1:54601  | NW_015094730.1 | 54601  | 54800  | 200  | 1  | 2.83E-08 | 6   | 3     | fnbp4                        | Receptor             |
| DMRNW_015094733.1:73701  | NW_015094733.1 | 73701  | 76200  | 2500 | 1  | 9.96E-10 | 55  | 2.2   | LOC106916808                 |                      |

|                          |                |        |        |       |   |          |     |       |                                                 |                      |
|--------------------------|----------------|--------|--------|-------|---|----------|-----|-------|-------------------------------------------------|----------------------|
| DMRNW_015094734.1:197401 | NW_015094734.1 | 197401 | 200300 | 2900  | 4 | 3.25E-11 | 76  | 2.621 |                                                 |                      |
| DMRNW_015094735.1:352701 | NW_015094735.1 | 352701 | 354400 | 1700  | 3 | 5.82E-74 | 35  | 2.059 | akap9                                           |                      |
| DMRNW_015094735.1:357601 | NW_015094735.1 | 357601 | 358200 | 600   | 1 | 2.19E-09 | 17  | 2.833 | akap9                                           |                      |
| DMRNW_015094737.1:438801 | NW_015094737.1 | 438801 | 440200 | 1400  | 1 | 9.70E-11 | 27  | 1.929 |                                                 |                      |
| DMRNW_015094737.1:451001 | NW_015094737.1 | 451001 | 453000 | 2000  | 1 | 4.34E-08 | 85  | 4.25  | LOC106916940                                    |                      |
| DMRNW_015094739.1:1501   | NW_015094739.1 | 1501   | 1900   | 400   | 1 | 6.48E-08 | 4   | 1     | LOC106916968                                    |                      |
| DMRNW_015094739.1:356601 | NW_015094739.1 | 356601 | 356900 | 300   | 1 | 5.04E-09 | 2   | 0.667 |                                                 |                      |
| DMRNW_015094742.1:304501 | NW_015094742.1 | 304501 | 305200 | 700   | 1 | 1.41E-09 | 24  | 3.429 | LOC106917018                                    |                      |
| DMRNW_015094745.1:162801 | NW_015094745.1 | 162801 | 163000 | 200   | 1 | 6.49E-08 | 2   | 1     | nkain2                                          | Transport            |
| DMRNW_015094745.1:210601 | NW_015094745.1 | 210601 | 212700 | 2100  | 3 | 6.38E-17 | 50  | 2.381 | nkain2                                          | Transport            |
| DMRNW_015094745.1:265801 | NW_015094745.1 | 265801 | 268500 | 2700  | 1 | 1.21E-09 | 49  | 1.815 | akap7                                           |                      |
| DMRNW_015094746.1:19101  | NW_015094746.1 | 19101  | 21400  | 2300  | 1 | 3.93E-09 | 91  | 3.957 | eps8                                            | Signaling            |
| DMRNW_015094746.1:239301 | NW_015094746.1 | 239301 | 240000 | 700   | 2 | 2.06E-09 | 9   | 1.286 |                                                 |                      |
| DMRNW_015094750.1:357701 | NW_015094750.1 | 357701 | 360300 | 2600  | 1 | 5.23E-11 | 76  | 2.923 | sorcs2                                          | Receptor             |
| DMRNW_015094754.1:381701 | NW_015094754.1 | 381701 | 382100 | 400   | 1 | 9.05E-08 | 3   | 0.75  | LOC106917241                                    |                      |
| DMRNW_015094755.1:316001 | NW_015094755.1 | 316001 | 320600 | 4600  | 2 | 1.55E-11 | 127 | 2.761 | LOC106917252                                    |                      |
| DMRNW_015094761.1:316401 | NW_015094761.1 | 316401 | 318700 | 2300  | 3 | 1.74E-16 | 39  | 1.696 | LOC106917366                                    |                      |
| DMRNW_015094764.1:621001 | NW_015094764.1 | 621001 | 622400 | 1400  | 2 | 8.43E-13 | 31  | 2.214 | LOC106917407                                    |                      |
| DMRNW_015094766.1:468401 | NW_015094766.1 | 468401 | 469000 | 600   | 1 | 4.78E-08 | 4   | 0.667 |                                                 |                      |
| DMRNW_015094767.1:48801  | NW_015094767.1 | 48801  | 50300  | 1500  | 1 | 1.13E-11 | 43  | 2.867 |                                                 |                      |
| DMRNW_015094767.1:249601 | NW_015094767.1 | 249601 | 251700 | 2100  | 2 | 5.73E-11 | 75  | 3.571 |                                                 |                      |
| DMRNW_015094767.1:289801 | NW_015094767.1 | 289801 | 290900 | 1100  | 1 | 1.32E-08 | 21  | 1.909 |                                                 |                      |
| DMRNW_015094768.1:365201 | NW_015094768.1 | 365201 | 367400 | 2200  | 1 | 3.74E-09 | 35  | 1.591 | tmc6                                            | Transport            |
| DMRNW_015094770.1:318801 | NW_015094770.1 | 318801 | 323700 | 4900  | 2 | 4.66E-09 | 160 | 3.265 | rin1                                            | Signaling            |
| DMRNW_015094771.1:138201 | NW_015094771.1 | 138201 | 138800 | 600   | 1 | 2.09E-08 | 10  | 1.667 | vwa8                                            |                      |
| DMRNW_015094771.1:366001 | NW_015094771.1 | 366001 | 369200 | 3200  | 2 | 2.19E-08 | 89  | 2.781 | epsti1                                          | Development          |
| DMRNW_015094771.1:373501 | NW_015094771.1 | 373501 | 374400 | 900   | 2 | 2.62E-08 | 15  | 1.667 | idh1                                            | Metabolism           |
| DMRNW_015094772.1:37601  | NW_015094772.1 | 37601  | 40600  | 3000  | 3 | 1.34E-12 | 59  | 1.967 | lmx1b                                           |                      |
| DMRNW_015094774.1:282301 | NW_015094774.1 | 282301 | 283500 | 1200  | 1 | 3.57E-08 | 43  | 3.583 | LOC106917709                                    |                      |
| DMRNW_015094775.1:94201  | NW_015094775.1 | 94201  | 95300  | 1100  | 2 | 6.11E-19 | 34  | 3.091 | gpc3;trnas-gcu;LOC106917717;trnaa-agc;trnaa-agg | Cytoskeleton         |
| DMRNW_015094775.1:100901 | NW_015094775.1 | 100901 | 101900 | 1000  | 3 | 9.50E-17 | 34  | 3.4   | gpc3;LOC106917717;trnaa-agc;trnaa-agg           | Cytoskeleton         |
| DMRNW_015094775.1:104601 | NW_015094775.1 | 104601 | 105700 | 1100  | 2 | 7.37E-13 | 26  | 2.364 | gpc3;LOC106917717;trnaa-agc                     | Cytoskeleton         |
| DMRNW_015094775.1:256401 | NW_015094775.1 | 256401 | 259600 | 3200  | 2 | 2.03E-11 | 134 | 4.188 | gpc3                                            | Cytoskeleton         |
| DMRNW_015094777.1:162401 | NW_015094777.1 | 162401 | 164500 | 2100  | 1 | 8.56E-09 | 62  | 2.952 | fsd1                                            |                      |
| DMRNW_015094777.1:231401 | NW_015094777.1 | 231401 | 231500 | 100   | 1 | 3.59E-08 | 1   | 1     | ubxn6                                           |                      |
| DMRNW_015094778.1:25601  | NW_015094778.1 | 25601  | 25900  | 300   | 1 | 3.94E-09 | 3   | 1     |                                                 |                      |
| DMRNW_015094781.1:126401 | NW_015094781.1 | 126401 | 133000 | 6600  | 1 | 2.22E-21 | 148 | 2.242 | gnl1                                            | Transcription        |
| DMRNW_015094783.1:228701 | NW_015094783.1 | 228701 | 229000 | 300   | 2 | 2.89E-09 | 14  | 4.667 |                                                 |                      |
| DMRNW_015094783.1:270501 | NW_015094783.1 | 270501 | 273200 | 2700  | 1 | 4.24E-08 | 43  | 1.593 | itga10                                          | Extracellular Matrix |
| DMRNW_015094783.1:345201 | NW_015094783.1 | 345201 | 345500 | 300   | 1 | 9.27E-09 | 2   | 0.667 | ash1l                                           |                      |
| DMRNW_015094785.1:324601 | NW_015094785.1 | 324601 | 327100 | 2500  | 1 | 2.45E-09 | 26  | 1.04  | grip2                                           | Signaling            |
| DMRNW_015094785.1:424701 | NW_015094785.1 | 424701 | 424900 | 200   | 2 | 1.63E-09 | 16  | 8     |                                                 |                      |
| DMRNW_015094786.1:111201 | NW_015094786.1 | 111201 | 111500 | 300   | 1 | 3.92E-08 | 23  | 7.667 | LOC106917945                                    |                      |
| DMRNW_015094788.1:313601 | NW_015094788.1 | 313601 | 316400 | 2800  | 1 | 5.54E-10 | 54  | 1.929 |                                                 |                      |
| DMRNW_015094788.1:365701 | NW_015094788.1 | 365701 | 366000 | 300   | 1 | 1.81E-10 | 4   | 1.333 |                                                 |                      |
| DMRNW_015094788.1:564301 | NW_015094788.1 | 564301 | 564500 | 200   | 1 | 4.19E-10 | 1   | 0.5   | LOC106917983                                    |                      |
| DMRNW_015094789.1:418401 | NW_015094789.1 | 418401 | 420400 | 2000  | 1 | 7.37E-08 | 56  | 2.8   |                                                 |                      |
| DMRNW_015094792.1:70901  | NW_015094792.1 | 70901  | 72800  | 1900  | 1 | 4.56E-08 | 57  | 3     | LOC106918030                                    |                      |
| DMRNW_015094793.1:175901 | NW_015094793.1 | 175901 | 180000 | 4100  | 1 | 1.78E-09 | 77  | 1.878 | LOC106918048;LOC106918039                       |                      |
| DMRNW_015094793.1:207801 | NW_015094793.1 | 207801 | 210100 | 2300  | 6 | 7.09E-25 | 65  | 2.826 | LOC106918050                                    |                      |
| DMRNW_015094794.1:218701 | NW_015094794.1 | 218701 | 220800 | 2100  | 1 | 2.93E-08 | 37  | 1.762 |                                                 |                      |
| DMRNW_015094795.1:83801  | NW_015094795.1 | 83801  | 86600  | 2800  | 1 | 1.08E-09 | 73  | 2.607 | kiaa2022                                        | Transcription        |
| DMRNW_015094798.1:377901 | NW_015094798.1 | 377901 | 380000 | 2100  | 1 | 9.97E-09 | 61  | 2.905 | LOC106918162                                    |                      |
| DMRNW_015094798.1:401601 | NW_015094798.1 | 401601 | 401900 | 300   | 1 | 7.02E-08 | 7   | 2.333 |                                                 |                      |
| DMRNW_015094799.1:473401 | NW_015094799.1 | 473401 | 475800 | 2400  | 5 | 1.30E-11 | 59  | 2.458 | LOC106918190                                    |                      |
| DMRNW_015094799.1:526401 | NW_015094799.1 | 526401 | 530300 | 3900  | 5 | 7.65E-17 | 95  | 2.436 | LOC106918190                                    |                      |
| DMRNW_015094803.1:319001 | NW_015094803.1 | 319001 | 319400 | 400   | 1 | 5.55E-10 | 9   | 2.25  |                                                 |                      |
| DMRNW_015094805.1:166101 | NW_015094805.1 | 166101 | 166300 | 200   | 2 | 2.55E-22 | 2   | 1     | LOC106918276                                    |                      |
| DMRNW_015094809.1:17901  | NW_015094809.1 | 17901  | 18200  | 300   | 1 | 9.49E-08 | 10  | 3.333 |                                                 |                      |
| DMRNW_015094809.1:252501 | NW_015094809.1 | 252501 | 252700 | 200   | 2 | 4.76E-10 | 7   | 3.5   |                                                 |                      |
| DMRNW_015094809.1:256301 | NW_015094809.1 | 256301 | 256600 | 300   | 1 | 2.34E-09 | 0   | 0     |                                                 |                      |
| DMRNW_015094810.1:125601 | NW_015094810.1 | 125601 | 137100 | 11500 | 1 | 4.89E-10 | 116 | 1.009 | LOC106918357;LOC106918358;LOC106918355          |                      |
| DMRNW_015094810.1:181501 | NW_015094810.1 | 181501 | 183300 | 1800  | 1 | 1.42E-14 | 32  | 1.778 | LOC106918359                                    |                      |
| DMRNW_015094812.1:146801 | NW_015094812.1 | 146801 | 147500 | 700   | 2 | 4.47E-10 | 5   | 0.714 |                                                 |                      |
| DMRNW_015094812.1:543001 | NW_015094812.1 | 543001 | 543200 | 200   | 1 | 9.66E-08 | 1   | 0.5   | LOC106918409                                    |                      |
| DMRNW_015094813.1:294401 | NW_015094813.1 | 294401 | 295900 | 1500  | 2 | 8.34E-10 | 26  | 1.733 | tns4                                            | Signaling            |
| DMRNW_015094816.1:54401  | NW_015094816.1 | 54401  | 57700  | 3300  | 1 | 7.95E-09 | 45  | 1.364 | LOC106918471                                    |                      |
| DMRNW_015094817.1:42001  | NW_015094817.1 | 42001  | 43500  | 1500  | 2 | 1.74E-12 | 37  | 2.467 | LOC106918477                                    |                      |
| DMRNW_015094817.1:153801 | NW_015094817.1 | 153801 | 154400 | 600   | 1 | 2.12E-08 | 10  | 1.667 | tex264                                          | Development          |
| DMRNW_015094817.1:227801 | NW_015094817.1 | 227801 | 228400 | 600   | 1 | 2.02E-11 | 16  | 2.667 | fancd2                                          |                      |



|                          |                |        |        |      |   |          |     |       |                           |                      |
|--------------------------|----------------|--------|--------|------|---|----------|-----|-------|---------------------------|----------------------|
| DMRNW_015094817.1:235701 | NW_015094817.1 | 235701 | 237000 | 1300 | 2 | 6.98E-15 | 36  | 2.769 |                           |                      |
| DMRNW_015094818.1:72901  | NW_015094818.1 | 72901  | 73800  | 900  | 1 | 8.51E-08 | 51  | 5.667 | rbm15                     | Transcription        |
| DMRNW_015094819.1:207001 | NW_015094819.1 | 207001 | 209700 | 2700 | 4 | 3.90E-16 | 99  | 3.667 |                           |                      |
| DMRNW_015094820.1:246601 | NW_015094820.1 | 246601 | 249300 | 2700 | 1 | 5.17E-08 | 49  | 1.815 | LOC106918584              |                      |
| DMRNW_015094822.1:325401 | NW_015094822.1 | 325401 | 328000 | 2600 | 1 | 7.65E-11 | 76  | 2.923 | cactin                    |                      |
| DMRNW_015094823.1:122501 | NW_015094823.1 | 122501 | 125400 | 2900 | 1 | 1.14E-10 | 30  | 1.034 | astn1                     |                      |
| DMRNW_015094827.1:385001 | NW_015094827.1 | 385001 | 388800 | 3800 | 3 | 2.07E-18 | 87  | 2.289 | wdr11                     |                      |
| DMRNW_015094829.1:114401 | NW_015094829.1 | 114401 | 114800 | 400  | 1 | 8.90E-09 | 23  | 5.75  | usp31                     | Proteolysis          |
| DMRNW_015094829.1:382801 | NW_015094829.1 | 382801 | 384000 | 1200 | 5 | 7.05E-16 | 54  | 4.5   |                           |                      |
| DMRNW_015094835.1:181601 | NW_015094835.1 | 181601 | 182400 | 800  | 1 | 1.13E-08 | 35  | 4.375 | cdh13                     | Extracellular Matrix |
| DMRNW_015094835.1:462401 | NW_015094835.1 | 462401 | 462900 | 500  | 1 | 5.26E-13 | 3   | 0.6   |                           |                      |
| DMRNW_015094835.1:488601 | NW_015094835.1 | 488601 | 491900 | 3300 | 1 | 8.40E-08 | 87  | 2.636 |                           |                      |
| DMRNW_015094838.1:503001 | NW_015094838.1 | 503001 | 503800 | 800  | 1 | 1.97E-09 | 3   | 0.375 | LOC106918891              |                      |
| DMRNW_015094839.1:205701 | NW_015094839.1 | 205701 | 206400 | 700  | 2 | 8.51E-13 | 13  | 1.857 |                           |                      |
| DMRNW_015094840.1:147501 | NW_015094840.1 | 147501 | 152600 | 5100 | 6 | 1.13E-12 | 115 | 2.255 | LOC106918932              |                      |
| DMRNW_015094840.1:153601 | NW_015094840.1 | 153601 | 159500 | 5900 | 5 | 2.66E-13 | 70  | 1.186 |                           |                      |
| DMRNW_015094841.1:527001 | NW_015094841.1 | 527001 | 528400 | 1400 | 2 | 4.08E-10 | 43  | 3.071 |                           |                      |
| DMRNW_015094842.1:363201 | NW_015094842.1 | 363201 | 364500 | 1300 | 3 | 6.69E-10 | 17  | 1.308 |                           |                      |
| DMRNW_015094842.1:371001 | NW_015094842.1 | 371001 | 371400 | 400  | 2 | 5.45E-25 | 7   | 1.75  |                           |                      |
| DMRNW_015094843.1:195001 | NW_015094843.1 | 195001 | 199300 | 4300 | 3 | 1.88E-10 | 75  | 1.744 | prdm6;LOC106918988        | Transcription        |
| DMRNW_015094851.1:52901  | NW_015094851.1 | 52901  | 53200  | 300  | 1 | 5.73E-09 | 2   | 0.667 |                           |                      |
| DMRNW_015094851.1:388101 | NW_015094851.1 | 388101 | 390100 | 2000 | 1 | 3.28E-10 | 54  | 2.7   |                           |                      |
| DMRNW_015094853.1:18001  | NW_015094853.1 | 18001  | 18400  | 400  | 2 | 3.56E-18 | 3   | 0.75  |                           |                      |
| DMRNW_015094854.1:138001 | NW_015094854.1 | 138001 | 140400 | 2400 | 1 | 6.08E-08 | 29  | 1.208 |                           |                      |
| DMRNW_015094856.1:47101  | NW_015094856.1 | 47101  | 47600  | 500  | 1 | 1.05E-08 | 31  | 6.2   | atp9b                     | Transport            |
| DMRNW_015094857.1:3901   | NW_015094857.1 | 3901   | 6000   | 2100 | 7 | 1.79E-16 | 24  | 1.143 | LOC106919185;LOC106919182 |                      |
| DMRNW_015094858.1:8301   | NW_015094858.1 | 8301   | 8700   | 400  | 2 | 2.32E-11 | 2   | 0.5   |                           |                      |
| DMRNW_015094859.1:440001 | NW_015094859.1 | 440001 | 440600 | 600  | 1 | 2.16E-08 | 3   | 0.5   |                           |                      |
| DMRNW_015094860.1:16301  | NW_015094860.1 | 16301  | 16900  | 600  | 3 | 9.08E-12 | 27  | 4.5   |                           |                      |
| DMRNW_015094860.1:139201 | NW_015094860.1 | 139201 | 143500 | 4300 | 1 | 7.57E-09 | 70  | 1.628 |                           |                      |
| DMRNW_015094860.1:315501 | NW_015094860.1 | 315501 | 316000 | 500  | 2 | 6.53E-14 | 14  | 2.8   |                           |                      |
| DMRNW_015094862.1:273101 | NW_015094862.1 | 273101 | 274000 | 900  | 1 | 3.11E-10 | 10  | 1.111 | LOC106919272              |                      |
| DMRNW_015094863.1:124501 | NW_015094863.1 | 124501 | 129700 | 5200 | 3 | 8.77E-10 | 176 | 3.385 | LOC106919291              |                      |
| DMRNW_015094864.1:293101 | NW_015094864.1 | 293101 | 294500 | 1400 | 2 | 2.07E-15 | 41  | 2.929 | tjp1                      | Extracellular Matrix |
| DMRNW_015094864.1:363401 | NW_015094864.1 | 363401 | 366400 | 3000 | 1 | 5.87E-10 | 95  | 3.167 | LOC106919354              |                      |
| DMRNW_015094867.1:311601 | NW_015094867.1 | 311601 | 313000 | 1400 | 1 | 2.52E-08 | 78  | 5.571 | aspa                      | Metabolism           |
| DMRNW_015094869.1:544301 | NW_015094869.1 | 544301 | 546800 | 2500 | 1 | 9.73E-09 | 84  | 3.36  | itgb5                     | Receptor             |
| DMRNW_015094869.1:568201 | NW_015094869.1 | 568201 | 569500 | 1300 | 1 | 6.40E-11 | 41  | 3.154 | itgb5                     | Receptor             |
| DMRNW_015094869.1:770201 | NW_015094869.1 | 770201 | 771700 | 1500 | 1 | 1.47E-11 | 33  | 2.2   | tsnare1                   | Transport            |
| DMRNW_015094874.1:313201 | NW_015094874.1 | 313201 | 314500 | 1300 | 1 | 4.89E-08 | 20  | 1.538 |                           |                      |
| DMRNW_015094875.1:318901 | NW_015094875.1 | 318901 | 319100 | 200  | 1 | 1.14E-09 | 1   | 0.5   | wnk4                      |                      |
| DMRNW_015094878.1:65501  | NW_015094878.1 | 65501  | 65800  | 300  | 1 | 6.31E-09 | 10  | 3.333 | LOC106919544              |                      |
| DMRNW_015094881.1:266501 | NW_015094881.1 | 266501 | 268500 | 2000 | 1 | 1.16E-09 | 47  | 2.35  | LOC106919638              |                      |
| DMRNW_015094883.1:87601  | NW_015094883.1 | 87601  | 95600  | 8000 | 4 | 1.22E-10 | 238 | 2.975 | LOC106919668              |                      |
| DMRNW_015094883.1:132901 | NW_015094883.1 | 132901 | 133700 | 800  | 1 | 7.17E-09 | 12  | 1.5   |                           |                      |
| DMRNW_015094885.1:43801  | NW_015094885.1 | 43801  | 46100  | 2300 | 2 | 3.62E-11 | 46  | 2     | LOC106919713              |                      |
| DMRNW_015094885.1:280201 | NW_015094885.1 | 280201 | 282200 | 2000 | 1 | 1.87E-12 | 43  | 2.15  | myo10                     | Cytoskeleton         |
| DMRNW_015094886.1:15601  | NW_015094886.1 | 15601  | 17400  | 1800 | 1 | 7.89E-08 | 10  | 0.556 |                           |                      |
| DMRNW_015094886.1:25701  | NW_015094886.1 | 25701  | 26200  | 500  | 1 | 1.31E-08 | 18  | 3.6   |                           |                      |
| DMRNW_015094886.1:28501  | NW_015094886.1 | 28501  | 30200  | 1700 | 2 | 4.67E-10 | 52  | 3.059 |                           |                      |
| DMRNW_015094886.1:57201  | NW_015094886.1 | 57201  | 59100  | 1900 | 4 | 5.56E-09 | 69  | 3.632 |                           |                      |
| DMRNW_015094889.1:191801 | NW_015094889.1 | 191801 | 194400 | 2600 | 1 | 1.39E-10 | 26  | 1     |                           |                      |
| DMRNW_015094891.1:38301  | NW_015094891.1 | 38301  | 39400  | 1100 | 1 | 1.23E-10 | 20  | 1.818 |                           |                      |
| DMRNW_015094894.1:474501 | NW_015094894.1 | 474501 | 475800 | 1300 | 1 | 1.07E-08 | 39  | 3     | gpr143;LOC106919849       |                      |
| DMRNW_015094895.1:166101 | NW_015094895.1 | 166101 | 168500 | 2400 | 1 | 1.23E-10 | 35  | 1.458 |                           |                      |
| DMRNW_015094898.1:103301 | NW_015094898.1 | 103301 | 103600 | 300  | 1 | 8.03E-09 | 8   | 2.667 | LOC106919901              |                      |
| DMRNW_015094900.1:234201 | NW_015094900.1 | 234201 | 235000 | 800  | 1 | 1.87E-09 | 41  | 5.125 | LOC106919937              |                      |
| DMRNW_015094903.1:166201 | NW_015094903.1 | 166201 | 167300 | 1100 | 1 | 1.74E-09 | 15  | 1.364 | rsrc1                     |                      |
| DMRNW_015094904.1:296701 | NW_015094904.1 | 296701 | 300200 | 3500 | 1 | 2.66E-08 | 40  | 1.143 | nphp4                     | Development          |
| DMRNW_015094905.1:560601 | NW_015094905.1 | 560601 | 564000 | 3400 | 2 | 3.30E-17 | 51  | 1.5   | opr1                      | Receptor             |
| DMRNW_015094906.1:171501 | NW_015094906.1 | 171501 | 171900 | 400  | 1 | 6.92E-17 | 17  | 4.25  | LOC106920002              |                      |
| DMRNW_015094907.1:10801  | NW_015094907.1 | 10801  | 15400  | 4600 | 3 | 1.47E-15 | 99  | 2.152 |                           |                      |
| DMRNW_015094907.1:295901 | NW_015094907.1 | 295901 | 298200 | 2300 | 1 | 6.23E-10 | 21  | 0.913 | atraid                    |                      |
| DMRNW_015094909.1:19601  | NW_015094909.1 | 19601  | 21400  | 1800 | 1 | 3.54E-08 | 25  | 1.389 | tulp4                     |                      |
| DMRNW_015094910.1:382701 | NW_015094910.1 | 382701 | 384000 | 1300 | 1 | 8.23E-15 | 17  | 1.308 | LOC106920077              |                      |
| DMRNW_015094912.1:103901 | NW_015094912.1 | 103901 | 105400 | 1500 | 4 | 1.74E-12 | 15  | 1     | LOC106920123              |                      |
| DMRNW_015094913.1:20601  | NW_015094913.1 | 20601  | 21600  | 1000 | 1 | 3.75E-09 | 21  | 2.1   |                           |                      |
| DMRNW_015094913.1:31501  | NW_015094913.1 | 31501  | 32800  | 1300 | 1 | 2.18E-08 | 38  | 2.923 |                           |                      |
| DMRNW_015094915.1:147201 | NW_015094915.1 | 147201 | 147500 | 300  | 2 | 5.39E-11 | 3   | 1     | LOC106920154              |                      |
| DMRNW_015094917.1:199501 | NW_015094917.1 | 199501 | 200300 | 800  | 2 | 2.08E-15 | 28  | 3.5   |                           |                      |

|                          |                |        |        |      |   |          |     |       |                           |               |
|--------------------------|----------------|--------|--------|------|---|----------|-----|-------|---------------------------|---------------|
| DMRNW_015094929.1:355001 | NW_015094929.1 | 355001 | 356500 | 1500 | 1 | 1.88E-08 | 16  | 1.067 | LOC106920354              |               |
| DMRNW_015094930.1:119301 | NW_015094930.1 | 119301 | 121300 | 2000 | 1 | 8.65E-11 | 27  | 1.35  | tmod4                     | Cytoskeleton  |
| DMRNW_015094932.1:214001 | NW_015094932.1 | 214001 | 215800 | 1800 | 2 | 7.37E-10 | 69  | 3.833 | LOC106920393              |               |
| DMRNW_015094932.1:633101 | NW_015094932.1 | 633101 | 634600 | 1500 | 1 | 9.15E-09 | 47  | 3.133 | gabbr1                    | Receptor      |
| DMRNW_015094932.1:635701 | NW_015094932.1 | 635701 | 636900 | 1200 | 1 | 1.23E-10 | 21  | 1.75  | gabbr1                    | Receptor      |
| DMRNW_015094932.1:790701 | NW_015094932.1 | 790701 | 791800 | 1100 | 2 | 1.57E-13 | 23  | 2.091 |                           |               |
| DMRNW_015094934.1:121201 | NW_015094934.1 | 121201 | 130200 | 9000 | 5 | 8.37E-12 | 302 | 3.356 | LOC106920461;LOC106920460 |               |
| DMRNW_015094934.1:141501 | NW_015094934.1 | 141501 | 144700 | 3200 | 2 | 2.12E-11 | 85  | 2.656 |                           |               |
| DMRNW_015094944.1:266201 | NW_015094944.1 | 266201 | 267500 | 1300 | 1 | 6.69E-08 | 19  | 1.462 | sgpp2                     | Signaling     |
| DMRNW_015094946.1:165401 | NW_015094946.1 | 165401 | 167700 | 2300 | 1 | 4.06E-08 | 43  | 1.87  | LOC106920636              |               |
| DMRNW_015094947.1:60501  | NW_015094947.1 | 60501  | 62300  | 1800 | 2 | 1.66E-12 | 68  | 3.778 |                           |               |
| DMRNW_015094949.1:142901 | NW_015094949.1 | 142901 | 143100 | 200  | 1 | 8.14E-08 | 5   | 2.5   | LOC106920671              |               |
| DMRNW_015094949.1:289901 | NW_015094949.1 | 289901 | 291000 | 1100 | 1 | 1.70E-08 | 8   | 0.727 |                           |               |
| DMRNW_015094951.1:149701 | NW_015094951.1 | 149701 | 151600 | 1900 | 1 | 2.56E-10 | 13  | 0.684 | LOC106920706              |               |
| DMRNW_015094955.1:98901  | NW_015094955.1 | 98901  | 99900  | 1000 | 1 | 3.07E-08 | 71  | 7.1   | arhgap21                  |               |
| DMRNW_015094957.1:252701 | NW_015094957.1 | 252701 | 253900 | 1200 | 1 | 2.89E-10 | 23  | 1.917 |                           |               |
| DMRNW_015094959.1:143201 | NW_015094959.1 | 143201 | 146600 | 3400 | 7 | 1.38E-30 | 78  | 2.294 | trps1                     | Development   |
| DMRNW_015094960.1:220101 | NW_015094960.1 | 220101 | 222100 | 2000 | 2 | 1.53E-09 | 33  | 1.65  |                           |               |
| DMRNW_015094960.1:314001 | NW_015094960.1 | 314001 | 316000 | 2000 | 1 | 8.32E-08 | 22  | 1.1   |                           |               |
| DMRNW_015094962.1:584401 | NW_015094962.1 | 584401 | 584700 | 300  | 1 | 1.74E-09 | 3   | 1     | LOC106920866              |               |
| DMRNW_015094964.1:200601 | NW_015094964.1 | 200601 | 205100 | 4500 | 2 | 6.03E-08 | 98  | 2.178 |                           |               |
| DMRNW_015094965.1:236201 | NW_015094965.1 | 236201 | 240100 | 3900 | 1 | 6.88E-09 | 93  | 2.385 | tcf7l2                    | Transcription |
| DMRNW_015094966.1:168201 | NW_015094966.1 | 168201 | 171800 | 3600 | 1 | 1.46E-08 | 58  | 1.611 |                           |               |
| DMRNW_015094968.1:25101  | NW_015094968.1 | 25101  | 26300  | 1200 | 1 | 7.64E-08 | 33  | 2.75  | LOC106920963              |               |
| DMRNW_015094968.1:49601  | NW_015094968.1 | 49601  | 50100  | 500  | 3 | 7.82E-15 | 16  | 3.2   | LOC106920963              |               |
| DMRNW_015094968.1:159501 | NW_015094968.1 | 159501 | 161300 | 1800 | 1 | 2.58E-08 | 59  | 3.278 | fnip1                     |               |
| DMRNW_015094968.1:177101 | NW_015094968.1 | 177101 | 177900 | 800  | 1 | 1.21E-11 | 13  | 1.625 | fnip1                     |               |
| DMRNW_015094968.1:252401 | NW_015094968.1 | 252401 | 252400 | 1200 | 2 | 4.21E-10 | 15  | 1.25  |                           |               |
| DMRNW_015094968.1:337001 | NW_015094968.1 | 337001 | 337300 | 300  | 1 | 2.81E-08 | 4   | 1.333 | LOC106920972              |               |
| DMRNW_015094973.1:269701 | NW_015094973.1 | 269701 | 270100 | 400  | 1 | 1.75E-09 | 10  | 2.5   | LOC106921059              |               |
| DMRNW_015094974.1:198201 | NW_015094974.1 | 198201 | 199900 | 1700 | 1 | 2.71E-08 | 36  | 2.118 | LOC106921071              |               |
| DMRNW_015094975.1:172801 | NW_015094975.1 | 172801 | 174100 | 1300 | 1 | 1.58E-09 | 40  | 3.077 | dtx1                      | Signaling     |
| DMRNW_015094976.1:330101 | NW_015094976.1 | 330101 | 330600 | 500  | 2 | 6.45E-08 | 3   | 0.6   |                           |               |
| DMRNW_015094976.1:342801 | NW_015094976.1 | 342801 | 344232 | 1432 | 1 | 4.72E-10 | 34  | 2.374 |                           |               |
| DMRNW_015094977.1:31201  | NW_015094977.1 | 31201  | 32800  | 1600 | 2 | 2.00E-12 | 29  | 1.812 |                           |               |
| DMRNW_015094979.1:211301 | NW_015094979.1 | 211301 | 211900 | 600  | 1 | 1.90E-08 | 7   | 1.167 | ahnak2                    |               |
| DMRNW_015094980.1:6901   | NW_015094980.1 | 6901   | 7300   | 400  | 3 | 4.69E-22 | 15  | 3.75  |                           |               |
| DMRNW_015094980.1:8401   | NW_015094980.1 | 8401   | 10500  | 2100 | 2 | 3.57E-10 | 40  | 1.905 |                           |               |
| DMRNW_015094982.1:330701 | NW_015094982.1 | 330701 | 335200 | 4500 | 3 | 6.97E-13 | 115 | 2.556 |                           |               |
| DMRNW_015094983.1:426901 | NW_015094983.1 | 426901 | 427200 | 300  | 1 | 7.89E-08 | 4   | 1.333 | lepr                      | Receptor      |
| DMRNW_015094984.1:8601   | NW_015094984.1 | 8601   | 10500  | 1900 | 2 | 5.56E-15 | 63  | 3.316 |                           |               |
| DMRNW_015094985.1:178901 | NW_015094985.1 | 178901 | 180100 | 1200 | 2 | 2.75E-11 | 36  | 3     |                           |               |
| DMRNW_015094985.1:181301 | NW_015094985.1 | 181301 | 183000 | 1700 | 1 | 3.41E-08 | 52  | 3.059 | mocs1                     | Unknown       |
| DMRNW_015094988.1:304501 | NW_015094988.1 | 304501 | 308700 | 4200 | 1 | 3.66E-10 | 145 | 3.452 | LOC106921292              |               |
| DMRNW_015094988.1:567801 | NW_015094988.1 | 567801 | 568800 | 1000 | 2 | 7.91E-10 | 4   | 0.4   |                           |               |
| DMRNW_015094990.1:181201 | NW_015094990.1 | 181201 | 183300 | 2100 | 1 | 2.80E-08 | 61  | 2.905 |                           |               |
| DMRNW_015094990.1:280001 | NW_015094990.1 | 280001 | 280700 | 700  | 1 | 2.21E-09 | 12  | 1.714 | LOC106921331              |               |
| DMRNW_015094990.1:453201 | NW_015094990.1 | 453201 | 457700 | 4500 | 1 | 5.49E-08 | 117 | 2.6   | scml2                     | Transcription |
| DMRNW_015094991.1:136601 | NW_015094991.1 | 136601 | 137400 | 800  | 1 | 9.37E-08 | 22  | 2.75  | fam168a                   |               |
| DMRNW_015094993.1:119301 | NW_015094993.1 | 119301 | 123000 | 3700 | 2 | 3.26E-09 | 95  | 2.568 | plekhm1                   |               |
| DMRNW_015094994.1:213201 | NW_015094994.1 | 213201 | 215200 | 2000 | 1 | 2.50E-09 | 73  | 3.65  | LOC106921416              |               |
| DMRNW_015095002.1:28001  | NW_015095002.1 | 28001  | 28300  | 300  | 2 | 2.06E-14 | 9   | 3     | LOC106921515              |               |
| DMRNW_015095002.1:269601 | NW_015095002.1 | 269601 | 272400 | 2800 | 1 | 1.61E-08 | 78  | 2.786 | LOC106921519              |               |
| DMRNW_015095003.1:156801 | NW_015095003.1 | 156801 | 157700 | 900  | 1 | 6.72E-08 | 10  | 1.111 |                           |               |
| DMRNW_015095005.1:261001 | NW_015095005.1 | 261001 | 262500 | 1500 | 1 | 1.81E-11 | 17  | 1.133 | znf385c                   |               |
| DMRNW_015095008.1:147801 | NW_015095008.1 | 147801 | 148200 | 400  | 4 | 2.49E-12 | 1   | 0.25  | mtcl1                     |               |
| DMRNW_015095008.1:279901 | NW_015095008.1 | 279901 | 280500 | 600  | 1 | 1.11E-12 | 19  | 3.167 | twsg1                     |               |
| DMRNW_015095012.1:26201  | NW_015095012.1 | 26201  | 28200  | 2000 | 1 | 8.09E-29 | 53  | 2.65  | syne3                     |               |
| DMRNW_015095012.1:205001 | NW_015095012.1 | 205001 | 206700 | 1700 | 1 | 2.45E-09 | 33  | 1.941 | LOC106921649              |               |
| DMRNW_015095013.1:179601 | NW_015095013.1 | 179601 | 181600 | 2000 | 1 | 5.11E-08 | 18  | 0.9   |                           |               |
| DMRNW_015095013.1:186901 | NW_015095013.1 | 186901 | 189000 | 2100 | 3 | 2.10E-09 | 17  | 0.81  |                           |               |
| DMRNW_015095013.1:193701 | NW_015095013.1 | 193701 | 200100 | 6400 | 1 | 4.09E-08 | 144 | 2.25  |                           |               |
| DMRNW_015095014.1:86201  | NW_015095014.1 | 86201  | 87500  | 1300 | 1 | 5.40E-09 | 24  | 1.846 |                           |               |
| DMRNW_015095014.1:326101 | NW_015095014.1 | 326101 | 326400 | 300  | 1 | 3.60E-12 | 2   | 0.667 |                           |               |
| DMRNW_015095019.1:146801 | NW_015095019.1 | 146801 | 147400 | 600  | 1 | 1.42E-09 | 3   | 0.5   | ufd1l                     | Signaling     |
| DMRNW_015095022.1:63801  | NW_015095022.1 | 63801  | 66600  | 2800 | 1 | 2.22E-09 | 71  | 2.536 | rptor                     |               |
| DMRNW_015095022.1:308301 | NW_015095022.1 | 308301 | 308600 | 300  | 1 | 1.03E-10 | 4   | 1.333 | scrn2                     | Unknown       |
| DMRNW_015095024.1:560301 | NW_015095024.1 | 560301 | 561700 | 1400 | 1 | 8.16E-12 | 28  | 2     |                           |               |
| DMRNW_015095027.1:229301 | NW_015095027.1 | 229301 | 230500 | 1200 | 2 | 1.50E-08 | 50  | 4.167 | sybu                      |               |
| DMRNW_015095029.1:106201 | NW_015095029.1 | 106201 | 108700 | 2500 | 1 | 4.44E-09 | 31  | 1.24  |                           |               |

|                          |                |        |        |      |    |          |     |       |                           |                            |
|--------------------------|----------------|--------|--------|------|----|----------|-----|-------|---------------------------|----------------------------|
| DMRNW_015095030.1:253201 | NW_015095030.1 | 253201 | 253400 | 200  | 1  | 2.11E-11 | 7   | 3.5   | LOC106921874              |                            |
| DMRNW_015095030.1:315601 | NW_015095030.1 | 315601 | 317200 | 1600 | 2  | 2.77E-11 | 26  | 1.625 | LOC106921872              |                            |
| DMRNW_015095031.1:311101 | NW_015095031.1 | 311101 | 312400 | 1300 | 1  | 2.07E-09 | 20  | 1.538 | strbp                     | Translation                |
| DMRNW_015095036.1:2901   | NW_015095036.1 | 2901   | 4700   | 1800 | 7  | 5.50E-15 | 56  | 3.111 |                           |                            |
| DMRNW_015095038.1:197101 | NW_015095038.1 | 197101 | 199400 | 2300 | 1  | 1.12E-09 | 59  | 2.565 |                           |                            |
| DMRNW_015095040.1:162201 | NW_015095040.1 | 162201 | 164600 | 2400 | 1  | 1.27E-09 | 34  | 1.417 | cdyl2                     | Metabolism                 |
| DMRNW_015095040.1:300301 | NW_015095040.1 | 300301 | 301600 | 1300 | 1  | 2.41E-09 | 21  | 1.615 | LOC106921999              |                            |
| DMRNW_015095041.1:113801 | NW_015095041.1 | 113801 | 115200 | 1400 | 1  | 3.21E-08 | 28  | 2     | LOC106922009              |                            |
| DMRNW_015095042.1:19901  | NW_015095042.1 | 19901  | 23600  | 3700 | 2  | 4.54E-11 | 113 | 3.054 | LOC106922027              |                            |
| DMRNW_015095042.1:565501 | NW_015095042.1 | 565501 | 572700 | 7200 | 1  | 8.68E-08 | 91  | 1.264 | LOC106922060              |                            |
| DMRNW_015095042.1:586601 | NW_015095042.1 | 586601 | 587000 | 400  | 1  | 2.05E-09 | 17  | 4.25  | LOC106922060              |                            |
| DMRNW_015095044.1:93401  | NW_015095044.1 | 93401  | 95900  | 2500 | 5  | 1.10E-12 | 61  | 2.44  | vps50                     |                            |
| DMRNW_015095045.1:83501  | NW_015095045.1 | 83501  | 84400  | 900  | 1  | 8.59E-14 | 11  | 1.222 | lrp1b                     | Metabolism                 |
| DMRNW_015095047.1:32701  | NW_015095047.1 | 32701  | 33900  | 1200 | 1  | 9.36E-08 | 29  | 2.417 | LOC106922103              |                            |
| DMRNW_015095051.1:293901 | NW_015095051.1 | 293901 | 295900 | 2000 | 3  | 7.35E-21 | 33  | 1.65  | nyap1;LOC106922191        |                            |
| DMRNW_015095052.1:34301  | NW_015095052.1 | 34301  | 37200  | 2900 | 1  | 5.15E-08 | 48  | 1.655 | LOC106922195              |                            |
| DMRNW_015095052.1:126001 | NW_015095052.1 | 126001 | 126200 | 200  | 1  | 5.07E-08 | 3   | 1.5   | creb5                     | Transcription              |
| DMRNW_015095053.1:378201 | NW_015095053.1 | 378201 | 379400 | 1200 | 1  | 7.83E-08 | 57  | 4.75  | dclk1                     |                            |
| DMRNW_015095054.1:207701 | NW_015095054.1 | 207701 | 208200 | 500  | 1  | 9.33E-08 | 4   | 0.8   | LOC106922241;sema3a       | Growth Factors & Cytokines |
| DMRNW_015095057.1:601901 | NW_015095057.1 | 601901 | 603400 | 1500 | 2  | 4.51E-09 | 47  | 3.133 | LOC106922328              |                            |
| DMRNW_015095060.1:66101  | NW_015095060.1 | 66101  | 70000  | 3900 | 1  | 1.89E-08 | 68  | 1.744 |                           |                            |
| DMRNW_015095069.1:292901 | NW_015095069.1 | 292901 | 295100 | 2200 | 1  | 2.59E-10 | 47  | 2.136 |                           |                            |
| DMRNW_015095070.1:119701 | NW_015095070.1 | 119701 | 121900 | 2200 | 1  | 6.92E-08 | 40  | 1.818 | LOC106922457              |                            |
| DMRNW_015095070.1:265301 | NW_015095070.1 | 265301 | 265500 | 200  | 1  | 7.49E-12 | 4   | 2     | col22a1                   | Extracellular Matrix       |
| DMRNW_015095072.1:137801 | NW_015095072.1 | 137801 | 139500 | 1700 | 1  | 6.14E-08 | 16  | 0.941 |                           |                            |
| DMRNW_015095076.1:170501 | NW_015095076.1 | 170501 | 173200 | 2700 | 2  | 9.43E-24 | 42  | 1.556 | LOC106922530              |                            |
| DMRNW_015095076.1:269201 | NW_015095076.1 | 269201 | 269600 | 400  | 1  | 9.63E-10 | 16  | 4     |                           |                            |
| DMRNW_015095078.1:526901 | NW_015095078.1 | 526901 | 529500 | 2600 | 2  | 2.32E-08 | 60  | 2.308 | LOC106922562              |                            |
| DMRNW_015095081.1:8001   | NW_015095081.1 | 8001   | 8500   | 500  | 1  | 4.69E-13 | 17  | 3.4   | LOC106922590              |                            |
| DMRNW_015095081.1:99101  | NW_015095081.1 | 99101  | 100500 | 1400 | 4  | 1.19E-12 | 93  | 6.643 |                           |                            |
| DMRNW_015095083.1:236401 | NW_015095083.1 | 236401 | 238900 | 2500 | 1  | 6.57E-08 | 66  | 2.64  | LOC106922630;LOC106922629 |                            |
| DMRNW_015095084.1:68601  | NW_015095084.1 | 68601  | 69500  | 900  | 1  | 6.59E-08 | 28  | 3.111 | LOC106922638              |                            |
| DMRNW_015095087.1:6901   | NW_015095087.1 | 6901   | 8800   | 1900 | 1  | 2.79E-13 | 52  | 2.737 | LOC106922674              |                            |
| DMRNW_015095088.1:74901  | NW_015095088.1 | 74901  | 76400  | 1500 | 1  | 6.01E-09 | 62  | 4.133 | LOC106922696              |                            |
| DMRNW_015095088.1:77901  | NW_015095088.1 | 77901  | 79000  | 1100 | 2  | 5.35E-12 | 30  | 2.727 | LOC106922696              |                            |
| DMRNW_015095088.1:106101 | NW_015095088.1 | 106101 | 107500 | 1400 | 1  | 6.57E-08 | 56  | 4     | LOC106922700;LOC106922698 |                            |
| DMRNW_015095095.1:56101  | NW_015095095.1 | 56101  | 57600  | 1500 | 1  | 7.65E-10 | 27  | 1.8   |                           |                            |
| DMRNW_015095095.1:249001 | NW_015095095.1 | 249001 | 253300 | 4300 | 1  | 3.97E-09 | 122 | 2.837 | LOC106922818              |                            |
| DMRNW_015095099.1:24301  | NW_015095099.1 | 24301  | 26900  | 2600 | 6  | 2.73E-31 | 96  | 3.692 |                           |                            |
| DMRNW_015095099.1:30801  | NW_015095099.1 | 30801  | 32700  | 1900 | 10 | 4.25E-35 | 125 | 6.579 |                           |                            |
| DMRNW_015095099.1:37401  | NW_015095099.1 | 37401  | 38500  | 1100 | 2  | 7.48E-12 | 46  | 4.182 | dgkq                      | Signaling                  |
| DMRNW_015095100.1:166501 | NW_015095100.1 | 166501 | 167400 | 900  | 1  | 8.70E-10 | 33  | 3.667 |                           |                            |
| DMRNW_015095101.1:99501  | NW_015095101.1 | 99501  | 100600 | 1100 | 2  | 1.62E-14 | 10  | 0.909 |                           |                            |
| DMRNW_015095101.1:117301 | NW_015095101.1 | 117301 | 118000 | 700  | 1  | 2.56E-08 | 10  | 1.429 |                           |                            |
| DMRNW_015095101.1:131701 | NW_015095101.1 | 131701 | 132400 | 700  | 1  | 9.03E-08 | 20  | 2.857 | psma1                     | Protease                   |
| DMRNW_015095105.1:200201 | NW_015095105.1 | 200201 | 200700 | 500  | 2  | 5.58E-12 | 3   | 0.6   | kcnk10                    | Transport                  |
| DMRNW_015095105.1:238901 | NW_015095105.1 | 238901 | 239900 | 1000 | 3  | 3.84E-09 | 25  | 2.5   |                           |                            |
| DMRNW_015095105.1:296601 | NW_015095105.1 | 296601 | 300300 | 3700 | 1  | 7.12E-09 | 89  | 2.405 |                           |                            |
| DMRNW_015095107.1:74101  | NW_015095107.1 | 74101  | 74800  | 700  | 2  | 1.06E-19 | 14  | 2     |                           |                            |
| DMRNW_015095109.1:20701  | NW_015095109.1 | 20701  | 21900  | 1200 | 4  | 6.05E-16 | 5   | 0.417 | LOC106923083              |                            |
| DMRNW_015095109.1:207401 | NW_015095109.1 | 207401 | 207900 | 500  | 1  | 1.77E-11 | 24  | 4.8   | LOC106923075              |                            |
| DMRNW_015095109.1:271901 | NW_015095109.1 | 271901 | 272300 | 400  | 2  | 3.20E-09 | 19  | 4.75  | LOC106923075              |                            |
| DMRNW_015095111.1:191601 | NW_015095111.1 | 191601 | 193000 | 1400 | 2  | 2.45E-09 | 25  | 1.786 |                           |                            |
| DMRNW_015095113.1:262701 | NW_015095113.1 | 262701 | 263600 | 900  | 4  | 2.74E-16 | 29  | 3.222 | LOC106923133;LOC106923140 |                            |
| DMRNW_015095115.1:104801 | NW_015095115.1 | 104801 | 105400 | 600  | 1  | 2.21E-09 | 4   | 0.667 | b4galt5                   | Golgi                      |
| DMRNW_015095115.1:192001 | NW_015095115.1 | 192001 | 198900 | 6900 | 1  | 1.58E-09 | 111 | 1.609 |                           |                            |
| DMRNW_015095117.1:285901 | NW_015095117.1 | 285901 | 288800 | 2900 | 1  | 1.10E-08 | 69  | 2.379 |                           |                            |
| DMRNW_015095119.1:267501 | NW_015095119.1 | 267501 | 269400 | 1900 | 1  | 9.05E-08 | 38  | 2     | LOC106923245              |                            |
| DMRNW_015095121.1:302401 | NW_015095121.1 | 302401 | 303800 | 1400 | 1  | 5.06E-11 | 35  | 2.5   | LOC106923270              |                            |
| DMRNW_015095124.1:83801  | NW_015095124.1 | 83801  | 84100  | 300  | 2  | 7.19E-11 | 2   | 0.667 | map7d1                    |                            |
| DMRNW_015095128.1:357801 | NW_015095128.1 | 357801 | 358200 | 400  | 1  | 6.63E-10 | 12  | 3     |                           |                            |
| DMRNW_015095131.1:133801 | NW_015095131.1 | 133801 | 136100 | 2300 | 1  | 3.39E-15 | 46  | 2     | thsd7b                    | Extracellular Matrix       |
| DMRNW_015095131.1:295101 | NW_015095131.1 | 295101 | 297400 | 2300 | 2  | 1.01E-13 | 30  | 1.304 | thsd7b                    | Extracellular Matrix       |
| DMRNW_015095137.1:281901 | NW_015095137.1 | 281901 | 284400 | 2500 | 1  | 1.00E-10 | 71  | 2.84  |                           |                            |
| DMRNW_015095141.1:27201  | NW_015095141.1 | 27201  | 27500  | 300  | 2  | 1.37E-10 | 3   | 1     |                           |                            |
| DMRNW_015095141.1:60101  | NW_015095141.1 | 60101  | 60700  | 600  | 1  | 2.65E-08 | 9   | 1.5   |                           |                            |
| DMRNW_015095141.1:223901 | NW_015095141.1 | 223901 | 226900 | 3000 | 1  | 1.40E-09 | 40  | 1.333 | LOC106923555              |                            |
| DMRNW_015095147.1:54801  | NW_015095147.1 | 54801  | 57400  | 2600 | 5  | 2.46E-13 | 89  | 3.423 |                           |                            |
| DMRNW_015095147.1:133401 | NW_015095147.1 | 133401 | 133900 | 500  | 1  | 4.13E-14 | 42  | 8.4   | dthd1                     |                            |

|                          |                |        |        |       |   |          |     |       |                            |               |
|--------------------------|----------------|--------|--------|-------|---|----------|-----|-------|----------------------------|---------------|
| DMRNW_015095148.1:148401 | NW_015095148.1 | 148401 | 148700 | 300   | 2 | 2.72E-09 | 1   | 0.333 | LOC106923619               |               |
| DMRNW_015095149.1:53001  | NW_015095149.1 | 53001  | 65300  | 12300 | 2 | 5.31E-10 | 193 | 1.569 | LOC106923649; tbc1d8b      |               |
| DMRNW_015095150.1:156301 | NW_015095150.1 | 156301 | 157400 | 1100  | 1 | 2.50E-08 | 24  | 2.182 |                            |               |
| DMRNW_015095150.1:246401 | NW_015095150.1 | 246401 | 248300 | 1900  | 1 | 6.02E-10 | 56  | 2.947 | LOC106923666               |               |
| DMRNW_015095156.1:17301  | NW_015095156.1 | 17301  | 19400  | 2100  | 1 | 1.16E-10 | 54  | 2.571 |                            |               |
| DMRNW_015095159.1:144101 | NW_015095159.1 | 144101 | 146100 | 2000  | 1 | 4.88E-08 | 58  | 2.9   |                            |               |
| DMRNW_015095160.1:118401 | NW_015095160.1 | 118401 | 119500 | 1100  | 1 | 9.74E-12 | 48  | 4.364 | LOC106923783               |               |
| DMRNW_015095162.1:56101  | NW_015095162.1 | 56101  | 58900  | 2800  | 1 | 6.66E-08 | 42  | 1.5   |                            |               |
| DMRNW_015095162.1:199701 | NW_015095162.1 | 199701 | 201500 | 1800  | 1 | 3.71E-08 | 57  | 3.167 | rally; LOC106923811        | Transcription |
| DMRNW_015095167.1:17101  | NW_015095167.1 | 17101  | 18600  | 1500  | 2 | 1.78E-12 | 22  | 1.467 |                            |               |
| DMRNW_015095167.1:131501 | NW_015095167.1 | 131501 | 132200 | 700   | 2 | 2.69E-24 | 7   | 1     |                            |               |
| DMRNW_015095170.1:67101  | NW_015095170.1 | 67101  | 68000  | 900   | 1 | 5.80E-08 | 38  | 4.222 | unc13c                     | Development   |
| DMRNW_015095171.1:14201  | NW_015095171.1 | 14201  | 15300  | 1100  | 1 | 3.48E-08 | 11  | 1     | LOC106923889               |               |
| DMRNW_015095174.1:152601 | NW_015095174.1 | 152601 | 153500 | 900   | 1 | 6.05E-08 | 29  | 3.222 | kiaa1109                   |               |
| DMRNW_015095179.1:13501  | NW_015095179.1 | 13501  | 15000  | 1500  | 2 | 1.06E-09 | 42  | 2.8   | LOC106924049; LOC106924024 |               |
| DMRNW_015095180.1:222901 | NW_015095180.1 | 222901 | 224700 | 1800  | 2 | 6.78E-30 | 64  | 3.556 | LOC106924056               |               |
| DMRNW_015095181.1:202501 | NW_015095181.1 | 202501 | 203500 | 1000  | 2 | 5.24E-09 | 27  | 2.7   | LOC106924072               |               |
| DMRNW_015095181.1:268201 | NW_015095181.1 | 268201 | 269900 | 1700  | 2 | 9.37E-15 | 42  | 2.471 |                            |               |
| DMRNW_015095183.1:36701  | NW_015095183.1 | 36701  | 39500  | 2800  | 2 | 3.72E-08 | 43  | 1.536 | LOC106924111               |               |
| DMRNW_015095184.1:246201 | NW_015095184.1 | 246201 | 248000 | 1800  | 1 | 5.41E-08 | 62  | 3.444 | LOC106924122               |               |
| DMRNW_015095184.1:282701 | NW_015095184.1 | 282701 | 283300 | 600   | 2 | 1.44E-21 | 13  | 2.167 | LOC106924122               |               |
| DMRNW_015095188.1:84801  | NW_015095188.1 | 84801  | 85400  | 600   | 1 | 1.23E-10 | 37  | 6.167 |                            |               |
| DMRNW_015095188.1:110001 | NW_015095188.1 | 110001 | 112700 | 2700  | 1 | 1.01E-09 | 85  | 3.148 | kifap3                     | Cytoskeleton  |
| DMRNW_015095188.1:120901 | NW_015095188.1 | 120901 | 121300 | 400   | 1 | 1.17E-09 | 30  | 7.5   | kifap3                     | Cytoskeleton  |
| DMRNW_015095188.1:160001 | NW_015095188.1 | 160001 | 162100 | 2100  | 3 | 1.11E-13 | 72  | 3.429 | trmt1l                     |               |
| DMRNW_015095188.1:172701 | NW_015095188.1 | 172701 | 173400 | 700   | 4 | 3.47E-24 | 55  | 7.857 | prpf38a                    |               |
| DMRNW_015095196.1:285801 | NW_015095196.1 | 285801 | 287600 | 1800  | 2 | 2.05E-12 | 108 | 6     |                            |               |
| DMRNW_015095197.1:125101 | NW_015095197.1 | 125101 | 126300 | 1200  | 3 | 2.34E-13 | 43  | 3.583 | celsr2                     | Cytoskeleton  |
| DMRNW_015095204.1:300801 | NW_015095204.1 | 300801 | 301500 | 700   | 1 | 4.46E-09 | 15  | 2.143 |                            |               |
| DMRNW_015095208.1:68301  | NW_015095208.1 | 68301  | 69600  | 1300  | 1 | 2.86E-13 | 13  | 1     |                            |               |
| DMRNW_015095209.1:152901 | NW_015095209.1 | 152901 | 153700 | 800   | 1 | 3.17E-12 | 14  | 1.75  | gal3st4                    | Golgi         |
| DMRNW_015095210.1:172201 | NW_015095210.1 | 172201 | 172500 | 300   | 1 | 2.51E-08 | 2   | 0.667 |                            |               |
| DMRNW_015095211.1:46601  | NW_015095211.1 | 46601  | 52000  | 5400  | 1 | 7.55E-08 | 198 | 3.667 | agap1; LOC106924463        | Signaling     |
| DMRNW_015095211.1:168901 | NW_015095211.1 | 168901 | 175000 | 6100  | 1 | 1.07E-08 | 177 | 2.902 | LOC106924468               |               |
| DMRNW_015095213.1:163001 | NW_015095213.1 | 163001 | 170300 | 7300  | 2 | 7.95E-16 | 145 | 1.986 | gcnt1                      | Golgi         |
| DMRNW_015095213.1:389301 | NW_015095213.1 | 389301 | 392900 | 3600  | 1 | 3.00E-09 | 62  | 1.722 | LOC106924519               |               |
| DMRNW_015095213.1:397701 | NW_015095213.1 | 397701 | 399700 | 2000  | 1 | 8.62E-08 | 35  | 1.75  |                            |               |
| DMRNW_015095214.1:113501 | NW_015095214.1 | 113501 | 119500 | 6000  | 3 | 6.55E-15 | 99  | 1.65  |                            |               |
| DMRNW_015095226.1:5201   | NW_015095226.1 | 5201   | 5600   | 400   | 1 | 1.42E-10 | 9   | 2.25  | LOC106924705               |               |
| DMRNW_015095226.1:9301   | NW_015095226.1 | 9301   | 10700  | 1400  | 1 | 4.67E-10 | 18  | 1.286 | LOC106924705               |               |
| DMRNW_015095226.1:14301  | NW_015095226.1 | 14301  | 14500  | 200   | 1 | 4.25E-08 | 11  | 5.5   |                            |               |
| DMRNW_015095226.1:38301  | NW_015095226.1 | 38301  | 38900  | 600   | 2 | 2.45E-08 | 21  | 3.5   | LOC106924713               |               |
| DMRNW_015095227.1:89601  | NW_015095227.1 | 89601  | 92100  | 2500  | 4 | 4.86E-24 | 86  | 3.44  | pac3                       |               |
| DMRNW_015095228.1:69201  | NW_015095228.1 | 69201  | 70600  | 1400  | 1 | 9.70E-11 | 13  | 0.929 | tmem100; LOC106924746      | Unknown       |
| DMRNW_015095228.1:332501 | NW_015095228.1 | 332501 | 333300 | 800   | 1 | 3.91E-12 | 6   | 0.75  |                            |               |
| DMRNW_015095229.1:183401 | NW_015095229.1 | 183401 | 189500 | 6100  | 5 | 5.78E-12 | 287 | 4.705 | LOC106924783; LOC106924784 |               |
| DMRNW_015095229.1:282601 | NW_015095229.1 | 282601 | 288200 | 5600  | 1 | 2.70E-09 | 104 | 1.857 | map2k5                     | Signaling     |
| DMRNW_015095232.1:306401 | NW_015095232.1 | 306401 | 308300 | 1900  | 1 | 9.70E-10 | 53  | 2.789 | ptprn2                     | Signaling     |
| DMRNW_015095232.1:334301 | NW_015095232.1 | 334301 | 334900 | 600   | 1 | 4.03E-08 | 9   | 1.5   | ptprn2                     | Signaling     |
| DMRNW_015095232.1:437501 | NW_015095232.1 | 437501 | 437700 | 200   | 1 | 5.58E-13 | 6   | 3     | ncapg2                     |               |
| DMRNW_015095232.1:511301 | NW_015095232.1 | 511301 | 512300 | 1000  | 1 | 4.20E-16 | 16  | 1.6   |                            |               |
| DMRNW_015095234.1:229401 | NW_015095234.1 | 229401 | 229700 | 300   | 1 | 2.02E-09 | 1   | 0.333 | LOC106924850               |               |
| DMRNW_015095237.1:148301 | NW_015095237.1 | 148301 | 149600 | 1300  | 1 | 3.77E-08 | 25  | 1.923 |                            |               |
| DMRNW_015095240.1:59701  | NW_015095240.1 | 59701  | 61600  | 1900  | 1 | 3.12E-09 | 60  | 3.158 |                            |               |
| DMRNW_015095243.1:193301 | NW_015095243.1 | 193301 | 195200 | 1900  | 2 | 2.86E-10 | 57  | 3     | hand2                      | Transcription |
| DMRNW_015095244.1:243301 | NW_015095244.1 | 243301 | 245100 | 1800  | 3 | 7.75E-18 | 46  | 2.556 | LOC106924959               |               |
| DMRNW_015095245.1:32201  | NW_015095245.1 | 32201  | 32400  | 200   | 1 | 8.66E-08 | 4   | 2     | LOC106924982               |               |
| DMRNW_015095248.1:236401 | NW_015095248.1 | 236401 | 240000 | 3600  | 1 | 4.65E-12 | 97  | 2.694 |                            |               |
| DMRNW_015095250.1:156901 | NW_015095250.1 | 156901 | 158900 | 2000  | 1 | 8.49E-09 | 62  | 3.1   | LOC106925029; LOC106925026 |               |
| DMRNW_015095254.1:127601 | NW_015095254.1 | 127601 | 127900 | 300   | 1 | 3.37E-10 | 11  | 3.667 | kcng3                      | Transport     |
| DMRNW_015095266.1:192901 | NW_015095266.1 | 192901 | 194100 | 1200  | 1 | 2.37E-08 | 24  | 2     | LOC106925216               |               |
| DMRNW_015095267.1:269301 | NW_015095267.1 | 269301 | 270100 | 800   | 2 | 1.52E-20 | 11  | 1.375 | LOC106925241               |               |
| DMRNW_015095267.1:273801 | NW_015095267.1 | 273801 | 276700 | 2900  | 2 | 3.32E-09 | 25  | 0.862 | LOC106925241               |               |
| DMRNW_015095277.1:72501  | NW_015095277.1 | 72501  | 76100  | 3600  | 1 | 8.95E-08 | 129 | 3.583 | zswim5                     | Transcription |
| DMRNW_015095279.1:53801  | NW_015095279.1 | 53801  | 54100  | 300   | 2 | 2.57E-13 | 5   | 1.667 | LOC106925354               |               |
| DMRNW_015095281.1:73601  | NW_015095281.1 | 73601  | 74000  | 400   | 1 | 1.01E-08 | 19  | 4.75  | LOC106925374               |               |
| DMRNW_015095282.1:22501  | NW_015095282.1 | 22501  | 25600  | 3100  | 2 | 5.34E-13 | 44  | 1.419 |                            |               |
| DMRNW_015095282.1:39701  | NW_015095282.1 | 39701  | 45400  | 5700  | 1 | 2.86E-08 | 141 | 2.474 | LOC106925395               |               |
| DMRNW_015095283.1:473801 | NW_015095283.1 | 473801 | 478200 | 4400  | 4 | 6.72E-23 | 112 | 2.545 |                            |               |
| DMRNW_015095284.1:192801 | NW_015095284.1 | 192801 | 193100 | 300   | 2 | 6.84E-23 | 0   | 0     | LOC106925436               |               |

|                          |                |        |          |      |   |          |     |       |                           |               |
|--------------------------|----------------|--------|----------|------|---|----------|-----|-------|---------------------------|---------------|
| DMRNW_015095284.1:196101 | NW_015095284.1 | 196101 | 196600   | 500  | 2 | 1.34E-27 | 1   | 0.2   | LOC106925436              |               |
| DMRNW_015095287.1:94401  | NW_015095287.1 | 94401  | 95200    | 800  | 1 | 7.04E-08 | 8   | 1     |                           |               |
| DMRNW_015095287.1:142901 | NW_015095287.1 | 142901 | 144200   | 1300 | 4 | 5.59E-13 | 42  | 3.231 | LOC106925467              |               |
| DMRNW_015095288.1:165101 | NW_015095288.1 | 165101 | 166700   | 1600 | 2 | 2.62E-09 | 41  | 2.562 | LOC106925473              |               |
| DMRNW_015095289.1:93901  | NW_015095289.1 | 93901  | 98800    | 4900 | 2 | 1.25E-16 | 131 | 2.673 |                           |               |
| DMRNW_015095289.1:102901 | NW_015095289.1 | 102901 | 105900   | 3000 | 2 | 3.80E-09 | 94  | 3.133 |                           |               |
| DMRNW_015095291.1:208001 | NW_015095291.1 | 208001 | 209100   | 1100 | 1 | 7.39E-08 | 27  | 2.455 | LOC106925508;LOC106925502 |               |
| DMRNW_015095292.1:104901 | NW_015095292.1 | 104901 | 106800   | 1900 | 2 | 8.46E-14 | 35  | 1.842 | nrp1                      | Receptor      |
| DMRNW_015095293.1:78401  | NW_015095293.1 | 78401  | 82200    | 3800 | 6 | 1.42E-24 | 61  | 1.605 |                           |               |
| DMRNW_015095294.1:108601 | NW_015095294.1 | 108601 | 111500   | 2900 | 1 | 2.00E-09 | 144 | 4.966 | taf1c                     |               |
| DMRNW_015095294.1:113501 | NW_015095294.1 | 113501 | 115600   | 2100 | 1 | 2.25E-15 | 100 | 4.762 | taf1c                     |               |
| DMRNW_015095294.1:174501 | NW_015095294.1 | 174501 | 175100   | 600  | 2 | 3.06E-29 | 17  | 2.833 | LOC106925544              |               |
| DMRNW_015095294.1:183301 | NW_015095294.1 | 183301 | 185200   | 1900 | 2 | 2.15E-28 | 46  | 2.421 | LOC106925544              |               |
| DMRNW_015095294.1:217801 | NW_015095294.1 | 217801 | 218700   | 900  | 2 | 2.07E-12 | 39  | 4.333 | LOC106925544              |               |
| DMRNW_015095296.1:95201  | NW_015095296.1 | 95201  | 96200    | 1000 | 1 | 1.34E-08 | 12  | 1.2   | st5                       |               |
| DMRNW_015095299.1:188001 | NW_015095299.1 | 188001 | 192500   | 4500 | 1 | 3.90E-08 | 107 | 2.378 | plekhm3                   | Signaling     |
| DMRNW_015095305.1:244201 | NW_015095305.1 | 244201 | 246400   | 2200 | 1 | 2.92E-08 | 66  | 3     | LOC106925685              |               |
| DMRNW_015095306.1:15601  | NW_015095306.1 | 15601  | 17800    | 2200 | 1 | 1.71E-10 | 23  | 1.045 | LOC106925701              |               |
| DMRNW_015095309.1:168201 | NW_015095309.1 | 168201 | 169400   | 1200 | 1 | 6.96E-09 | 10  | 0.833 | cd81                      | Signaling     |
| DMRNW_015095311.1:86101  | NW_015095311.1 | 86101  | 86300    | 200  | 1 | 1.26E-08 | 3   | 1.5   | LOC106925778              |               |
| DMRNW_015095315.1:166101 | NW_015095315.1 | 166101 | 169200   | 3100 | 1 | 8.54E-08 | 52  | 1.677 | LOC106925806              |               |
| DMRNW_015095316.1:222301 | NW_015095316.1 | 222301 | 222600   | 300  | 1 | 3.63E-09 | 4   | 1.333 | LOC106925817              |               |
| DMRNW_015095318.1:176401 | NW_015095318.1 | 176401 | 181700   | 5300 | 6 | 1.89E-13 | 177 | 3.34  | sema5b                    |               |
| DMRNW_015095320.1:2801   | NW_015095320.1 | 2801   | 3300     | 500  | 1 | 4.83E-12 | 27  | 5.4   |                           |               |
| DMRNW_015095323.1:188501 | NW_015095323.1 | 188501 | 191800   | 3300 | 2 | 1.88E-14 | 68  | 2.061 | LOC106925915              |               |
| DMRNW_015095325.1:198501 | NW_015095325.1 | 198501 | 200500   | 2000 | 1 | 1.19E-11 | 25  | 1.25  |                           |               |
| DMRNW_015095328.1:95601  | NW_015095328.1 | 95601  | 96000    | 400  | 1 | 2.76E-10 | 10  | 2.5   |                           |               |
| DMRNW_015095336.1:29001  | NW_015095336.1 | 29001  | 30500    | 1500 | 1 | 4.82E-11 | 78  | 5.2   | LOC106926059              |               |
| DMRNW_015095339.1:245701 | NW_015095339.1 | 245701 | 246900   | 1200 | 3 | 1.56E-18 | 31  | 2.583 |                           |               |
| DMRNW_015095340.1:204701 | NW_015095340.1 | 204701 | 206500   | 1800 | 1 | 1.66E-09 | 34  | 1.889 | dgki                      | Signaling     |
| DMRNW_015095342.1:114401 | NW_015095342.1 | 114401 | 115800   | 1400 | 4 | 3.84E-21 | 24  | 1.714 | LOC106926154              |               |
| DMRNW_015095342.1:199801 | NW_015095342.1 | 199801 | 200100   | 300  | 1 | 1.62E-10 | 10  | 3.333 | wfdc1                     |               |
| DMRNW_015095343.1:5701   | NW_015095343.1 | 5701   | 11100    | 5400 | 1 | 4.60E-10 | 172 | 3.185 | LOC106926167              |               |
| DMRNW_015095344.1:227001 | NW_015095344.1 | 227001 | 228500   | 1500 | 1 | 7.63E-10 | 39  | 2.6   |                           |               |
| DMRNW_015095345.1:14901  | NW_015095345.1 | 14901  | 15700    | 800  | 1 | 9.31E-12 | 13  | 1.625 | dnm1                      | Cytoskeleton  |
| DMRNW_015095346.1:204701 | NW_015095346.1 | 204701 | 207500   | 2800 | 1 | 7.37E-10 | 63  | 2.25  | agmo                      | Metabolism    |
| DMRNW_015095348.1:48801  | NW_015095348.1 | 48801  | 50600    | 1800 | 2 | 3.21E-09 | 23  | 1.278 | ptpn4;LOC106926213        |               |
| DMRNW_015095352.1:129201 | NW_015095352.1 | 129201 | 130200   | 1000 | 2 | 1.87E-12 | 28  | 2.8   | LOC106926252              |               |
| DMRNW_015095352.1:145101 | NW_015095352.1 | 145101 | 146900   | 1800 | 2 | 1.26E-20 | 56  | 3.111 |                           |               |
| DMRNW_015095353.1:208601 | NW_015095353.1 | 208601 | 209400   | 800  | 2 | 2.01E-12 | 18  | 2.25  | ttll10                    |               |
| DMRNW_015095356.1:111301 | NW_015095356.1 | 111301 | 112400   | 1100 | 2 | 6.45E-09 | 39  | 3.545 |                           |               |
| DMRNW_015095356.1:117101 | NW_015095356.1 | 117101 | 119400   | 2300 | 3 | 6.10E-22 | 54  | 2.348 | LOC106926305              |               |
| DMRNW_015095356.1:199701 | NW_015095356.1 | 199701 | 2.00E+05 | 300  | 1 | 6.00E-08 | 4   | 1.333 |                           |               |
| DMRNW_015095357.1:265901 | NW_015095357.1 | 265901 | 266700   | 800  | 1 | 2.16E-08 | 8   | 1     | LOC106926311              |               |
| DMRNW_015095359.1:50501  | NW_015095359.1 | 50501  | 51700    | 1200 | 2 | 1.98E-10 | 26  | 2.167 | capn7                     | Proteolysis   |
| DMRNW_015095360.1:214701 | NW_015095360.1 | 214701 | 215900   | 1200 | 1 | 1.35E-08 | 20  | 1.667 | nr5a1                     | Receptor      |
| DMRNW_015095362.1:162201 | NW_015095362.1 | 162201 | 162500   | 300  | 1 | 7.10E-08 | 8   | 2.667 | LOC106926372              |               |
| DMRNW_015095367.1:344301 | NW_015095367.1 | 344301 | 345400   | 1100 | 1 | 9.26E-09 | 23  | 2.091 |                           |               |
| DMRNW_015095367.1:390801 | NW_015095367.1 | 390801 | 392749   | 1949 | 5 | 2.38E-27 | 37  | 1.898 |                           |               |
| DMRNW_015095369.1:153301 | NW_015095369.1 | 153301 | 155500   | 2200 | 2 | 1.43E-08 | 48  | 2.182 |                           |               |
| DMRNW_015095375.1:1      | NW_015095375.1 | 1      | 400      | 400  | 2 | 1.29E-17 | 9   | 2.25  |                           |               |
| DMRNW_015095375.1:7101   | NW_015095375.1 | 7101   | 7900     | 800  | 1 | 3.45E-08 | 31  | 3.875 |                           |               |
| DMRNW_015095375.1:171401 | NW_015095375.1 | 171401 | 172200   | 800  | 3 | 1.76E-10 | 24  | 3     |                           |               |
| DMRNW_015095387.1:60901  | NW_015095387.1 | 60901  | 61100    | 200  | 1 | 3.22E-08 | 2   | 1     |                           |               |
| DMRNW_015095388.1:82901  | NW_015095388.1 | 82901  | 84000    | 1100 | 1 | 4.20E-08 | 28  | 2.545 | LOC106926654              |               |
| DMRNW_015095393.1:155201 | NW_015095393.1 | 155201 | 156900   | 1700 | 1 | 5.45E-08 | 49  | 2.882 | LOC106926703              |               |
| DMRNW_015095396.1:162801 | NW_015095396.1 | 162801 | 163200   | 400  | 1 | 4.91E-10 | 28  | 7     | LOC106926728              |               |
| DMRNW_015095396.1:166201 | NW_015095396.1 | 166201 | 166800   | 600  | 2 | 7.37E-17 | 21  | 3.5   | LOC106926728              |               |
| DMRNW_015095396.1:335401 | NW_015095396.1 | 335401 | 337600   | 2200 | 5 | 1.40E-13 | 74  | 3.364 | barhl1                    | Transcription |
| DMRNW_015095398.1:85501  | NW_015095398.1 | 85501  | 87600    | 2100 | 1 | 3.56E-08 | 50  | 2.381 | asic4                     | Transport     |
| DMRNW_015095401.1:170001 | NW_015095401.1 | 170001 | 173100   | 3100 | 1 | 8.16E-08 | 58  | 1.871 |                           |               |
| DMRNW_015095401.1:222901 | NW_015095401.1 | 222901 | 226700   | 3800 | 1 | 6.03E-11 | 97  | 2.553 |                           |               |
| DMRNW_015095404.1:120801 | NW_015095404.1 | 120801 | 122200   | 1400 | 1 | 2.62E-10 | 31  | 2.214 | LOC106926818              |               |
| DMRNW_015095407.1:13901  | NW_015095407.1 | 13901  | 14400    | 500  | 3 | 1.61E-14 | 3   | 0.6   | itsn1                     | Signaling     |
| DMRNW_015095408.1:175301 | NW_015095408.1 | 175301 | 177900   | 2600 | 2 | 1.35E-09 | 60  | 2.308 |                           |               |
| DMRNW_015095409.1:168601 | NW_015095409.1 | 168601 | 169200   | 600  | 1 | 5.63E-08 | 17  | 2.833 | LOC106926863              |               |
| DMRNW_015095416.1:11201  | NW_015095416.1 | 11201  | 13100    | 1900 | 2 | 3.06E-10 | 76  | 4     | LOC106926922;trim23       | Signaling     |
| DMRNW_015095416.1:18101  | NW_015095416.1 | 18101  | 19500    | 1400 | 1 | 1.01E-08 | 60  | 4.286 | trim23                    | Signaling     |
| DMRNW_015095416.1:175801 | NW_015095416.1 | 175801 | 179700   | 3900 | 1 | 1.09E-20 | 88  | 2.256 | plac8                     |               |
| DMRNW_015095418.1:5501   | NW_015095418.1 | 5501   | 6500     | 1000 | 1 | 6.00E-08 | 32  | 3.2   |                           |               |

|                          |                |        |        |      |   |          |     |       |                           |                      |
|--------------------------|----------------|--------|--------|------|---|----------|-----|-------|---------------------------|----------------------|
| DMRNW_015095419.1:246901 | NW_015095419.1 | 246901 | 247200 | 300  | 1 | 4.62E-08 | 2   | 0.667 |                           |                      |
| DMRNW_015095426.1:184601 | NW_015095426.1 | 184601 | 188800 | 4200 | 2 | 2.61E-09 | 217 | 5.167 | skp2;LOC106927065         |                      |
| DMRNW_015095427.1:215901 | NW_015095427.1 | 215901 | 216200 | 300  | 1 | 3.19E-09 | 10  | 3.333 | atf7ip                    |                      |
| DMRNW_015095432.1:27001  | NW_015095432.1 | 27001  | 27300  | 300  | 3 | 3.28E-13 | 4   | 1.333 | LOC106927110              |                      |
| DMRNW_015095432.1:71101  | NW_015095432.1 | 71101  | 71500  | 400  | 1 | 1.54E-08 | 31  | 7.75  | LOC106927114              |                      |
| DMRNW_015095432.1:194701 | NW_015095432.1 | 194701 | 196300 | 1600 | 1 | 2.40E-08 | 64  | 4     | elac2                     | Translation          |
| DMRNW_015095434.1:33301  | NW_015095434.1 | 33301  | 35500  | 2200 | 1 | 2.57E-10 | 50  | 2.273 |                           |                      |
| DMRNW_015095434.1:205301 | NW_015095434.1 | 205301 | 206800 | 1500 | 1 | 1.91E-09 | 37  | 2.467 |                           |                      |
| DMRNW_015095436.1:198701 | NW_015095436.1 | 198701 | 201500 | 2800 | 9 | 8.02E-25 | 44  | 1.571 | nphs1                     | Extracellular Matrix |
| DMRNW_015095442.1:47201  | NW_015095442.1 | 47201  | 48600  | 1400 | 2 | 3.88E-13 | 11  | 0.786 |                           |                      |
| DMRNW_015095442.1:54101  | NW_015095442.1 | 54101  | 56300  | 2200 | 5 | 6.04E-16 | 21  | 0.955 |                           |                      |
| DMRNW_015095443.1:12201  | NW_015095443.1 | 12201  | 13700  | 1500 | 1 | 2.05E-10 | 7   | 0.467 | LOC106927250              |                      |
| DMRNW_015095446.1:207401 | NW_015095446.1 | 207401 | 208800 | 1400 | 2 | 6.98E-11 | 28  | 2     | LOC106927273              |                      |
| DMRNW_015095448.1:127501 | NW_015095448.1 | 127501 | 133500 | 6000 | 1 | 2.27E-09 | 153 | 2.55  | LOC106927306              |                      |
| DMRNW_015095453.1:204101 | NW_015095453.1 | 204101 | 206400 | 2300 | 1 | 9.52E-09 | 36  | 1.565 |                           |                      |
| DMRNW_015095454.1:183301 | NW_015095454.1 | 183301 | 185200 | 1900 | 1 | 7.25E-08 | 30  | 1.579 | LOC106927372              |                      |
| DMRNW_015095455.1:126501 | NW_015095455.1 | 126501 | 128600 | 2100 | 1 | 2.22E-08 | 37  | 1.762 |                           |                      |
| DMRNW_015095457.1:86801  | NW_015095457.1 | 86801  | 88300  | 1500 | 1 | 7.91E-08 | 13  | 0.867 | tmem132c                  | Unknown              |
| DMRNW_015095458.1:48301  | NW_015095458.1 | 48301  | 49600  | 1300 | 1 | 3.80E-09 | 9   | 0.692 | baz1a                     | Metabolism           |
| DMRNW_015095461.1:194101 | NW_015095461.1 | 194101 | 196000 | 1900 | 6 | 1.11E-14 | 67  | 3.526 | LOC106927450              |                      |
| DMRNW_015095465.1:98501  | NW_015095465.1 | 98501  | 100800 | 2300 | 1 | 1.65E-08 | 63  | 2.739 | sdccag8                   |                      |
| DMRNW_015095466.1:10201  | NW_015095466.1 | 10201  | 11900  | 1700 | 3 | 1.93E-22 | 53  | 3.118 | LOC106927541              |                      |
| DMRNW_015095471.1:115901 | NW_015095471.1 | 115901 | 116500 | 600  | 4 | 3.86E-37 | 8   | 1.333 | aldh1a3                   | Metabolism           |
| DMRNW_015095471.1:167601 | NW_015095471.1 | 167601 | 174400 | 6800 | 2 | 7.54E-11 | 54  | 0.794 |                           |                      |
| DMRNW_015095473.1:145501 | NW_015095473.1 | 145501 | 146500 | 1000 | 1 | 3.68E-10 | 36  | 3.6   |                           |                      |
| DMRNW_015095473.1:188401 | NW_015095473.1 | 188401 | 192500 | 4100 | 1 | 2.73E-10 | 132 | 3.22  | tpmt;LOC106927636         |                      |
| DMRNW_015095474.1:277101 | NW_015095474.1 | 277101 | 279200 | 2100 | 1 | 9.11E-08 | 67  | 3.19  |                           |                      |
| DMRNW_015095475.1:181701 | NW_015095475.1 | 181701 | 182900 | 1200 | 1 | 3.93E-09 | 13  | 1.083 |                           |                      |
| DMRNW_015095476.1:61301  | NW_015095476.1 | 61301  | 62400  | 1100 | 2 | 7.17E-09 | 20  | 1.818 |                           |                      |
| DMRNW_015095477.1:4901   | NW_015095477.1 | 4901   | 7100   | 2200 | 1 | 5.30E-11 | 35  | 1.591 | LOC106927688              |                      |
| DMRNW_015095477.1:38801  | NW_015095477.1 | 38801  | 42000  | 3200 | 5 | 1.49E-22 | 49  | 1.531 | LOC106927690              |                      |
| DMRNW_015095477.1:113101 | NW_015095477.1 | 113101 | 116200 | 3100 | 2 | 7.74E-09 | 98  | 3.161 |                           |                      |
| DMRNW_015095479.1:50901  | NW_015095479.1 | 50901  | 54100  | 3200 | 1 | 1.37E-09 | 63  | 1.969 | LOC106927731              |                      |
| DMRNW_015095481.1:211201 | NW_015095481.1 | 211201 | 213300 | 2100 | 1 | 9.36E-08 | 32  | 1.524 | LOC106927752              |                      |
| DMRNW_015095484.1:239301 | NW_015095484.1 | 239301 | 239500 | 200  | 2 | 1.15E-08 | 4   | 2     | tmem233                   |                      |
| DMRNW_015095486.1:107701 | NW_015095486.1 | 107701 | 110400 | 2700 | 1 | 2.14E-14 | 53  | 1.963 | nxn                       | Signaling            |
| DMRNW_015095489.1:200401 | NW_015095489.1 | 200401 | 201300 | 900  | 1 | 8.20E-09 | 29  | 3.222 |                           |                      |
| DMRNW_015095489.1:340801 | NW_015095489.1 | 340801 | 343100 | 2300 | 1 | 1.95E-11 | 54  | 2.348 | alk                       | Receptor             |
| DMRNW_015095499.1:74101  | NW_015095499.1 | 74101  | 76000  | 1900 | 1 | 5.23E-08 | 50  | 2.632 | LOC106927964              |                      |
| DMRNW_015095511.1:190101 | NW_015095511.1 | 190101 | 191400 | 1300 | 3 | 1.36E-14 | 22  | 1.692 |                           |                      |
| DMRNW_015095512.1:165601 | NW_015095512.1 | 165601 | 166400 | 800  | 3 | 9.13E-10 | 30  | 3.75  |                           |                      |
| DMRNW_015095514.1:214801 | NW_015095514.1 | 214801 | 216900 | 2100 | 1 | 2.36E-09 | 89  | 4.238 | LOC106928109              |                      |
| DMRNW_015095516.1:83401  | NW_015095516.1 | 83401  | 84600  | 1200 | 2 | 6.71E-10 | 35  | 2.917 | nrm;ppp1r18               |                      |
| DMRNW_015095516.1:201401 | NW_015095516.1 | 201401 | 202800 | 1400 | 1 | 4.86E-08 | 14  | 1     |                           |                      |
| DMRNW_015095517.1:43501  | NW_015095517.1 | 43501  | 44000  | 500  | 1 | 9.97E-09 | 0   | 0     | rasal2                    | Signaling            |
| DMRNW_015095522.1:112301 | NW_015095522.1 | 112301 | 112900 | 600  | 2 | 5.89E-13 | 15  | 2.5   |                           |                      |
| DMRNW_015095524.1:262601 | NW_015095524.1 | 262601 | 264500 | 1900 | 1 | 5.41E-12 | 20  | 1.053 | man1a1                    | Golgi                |
| DMRNW_015095526.1:301    | NW_015095526.1 | 301    | 2900   | 2600 | 4 | 2.45E-10 | 61  | 2.346 | tmem266                   |                      |
| DMRNW_015095538.1:70601  | NW_015095538.1 | 70601  | 73400  | 2800 | 2 | 8.55E-12 | 68  | 2.429 | luzp1                     |                      |
| DMRNW_015095541.1:101    | NW_015095541.1 | 101    | 7900   | 7800 | 2 | 7.81E-12 | 125 | 1.603 | LOC106928480;LOC106928479 |                      |
| DMRNW_015095543.1:228401 | NW_015095543.1 | 228401 | 228600 | 200  | 2 | 1.87E-11 | 2   | 1     |                           |                      |
| DMRNW_015095544.1:1      | NW_015095544.1 | 1      | 3200   | 3200 | 4 | 2.12E-12 | 77  | 2.406 | LOC106928514              |                      |
| DMRNW_015095547.1:20401  | NW_015095547.1 | 20401  | 21500  | 1100 | 3 | 1.10E-15 | 11  | 1     | LOC106928571              |                      |
| DMRNW_015095547.1:46501  | NW_015095547.1 | 46501  | 50000  | 3500 | 2 | 6.70E-10 | 225 | 6.429 | LOC106928574;LOC106928573 |                      |
| DMRNW_015095547.1:160801 | NW_015095547.1 | 160801 | 161500 | 700  | 2 | 2.94E-25 | 22  | 3.143 | LOC106928563              |                      |
| DMRNW_015095547.1:171401 | NW_015095547.1 | 171401 | 177600 | 6200 | 1 | 3.76E-10 | 223 | 3.597 | LOC106928576              |                      |
| DMRNW_015095548.1:123301 | NW_015095548.1 | 123301 | 124100 | 800  | 1 | 9.05E-09 | 34  | 4.25  | fam13b                    |                      |
| DMRNW_015095548.1:199201 | NW_015095548.1 | 199201 | 203400 | 4200 | 1 | 1.87E-08 | 82  | 1.952 |                           |                      |
| DMRNW_015095551.1:400901 | NW_015095551.1 | 400901 | 402500 | 1600 | 1 | 5.59E-09 | 9   | 0.562 | LOC106928608              |                      |
| DMRNW_015095556.1:118101 | NW_015095556.1 | 118101 | 119200 | 1100 | 3 | 4.10E-27 | 34  | 3.091 | LOC106928675              |                      |
| DMRNW_015095557.1:122801 | NW_015095557.1 | 122801 | 124600 | 1800 | 1 | 2.54E-10 | 48  | 2.667 | LOC106928688;LOC106928689 |                      |
| DMRNW_015095557.1:154401 | NW_015095557.1 | 154401 | 157100 | 2700 | 1 | 1.90E-08 | 68  | 2.519 | npat                      | Transcription        |
| DMRNW_015095560.1:91201  | NW_015095560.1 | 91201  | 92600  | 1400 | 1 | 9.10E-10 | 64  | 4.571 | zhx1                      | Transcription        |
| DMRNW_015095562.1:142601 | NW_015095562.1 | 142601 | 144800 | 2200 | 1 | 6.12E-09 | 50  | 2.273 | LOC106928731              |                      |
| DMRNW_015095563.1:148701 | NW_015095563.1 | 148701 | 150200 | 1500 | 2 | 4.02E-12 | 13  | 0.867 | LOC106928744              |                      |
| DMRNW_015095564.1:117501 | NW_015095564.1 | 117501 | 120900 | 3400 | 1 | 2.86E-08 | 74  | 2.176 |                           |                      |
| DMRNW_015095566.1:187601 | NW_015095566.1 | 187601 | 189600 | 2000 | 1 | 4.30E-09 | 23  | 1.15  | LOC106928768              |                      |
| DMRNW_015095568.1:201101 | NW_015095568.1 | 201101 | 204700 | 3600 | 1 | 3.64E-15 | 94  | 2.611 | basp1                     |                      |
| DMRNW_015095568.1:209101 | NW_015095568.1 | 209101 | 210800 | 1700 | 1 | 3.87E-09 | 49  | 2.882 | basp1                     |                      |
| DMRNW_015095570.1:41201  | NW_015095570.1 | 41201  | 42500  | 1300 | 1 | 1.04E-12 | 21  | 1.615 | LOC106928786              |                      |

|                          |                |        |        |      |   |          |     |       |                           |                      |
|--------------------------|----------------|--------|--------|------|---|----------|-----|-------|---------------------------|----------------------|
| DMRNW_015095570.1:95801  | NW_015095570.1 | 95801  | 97000  | 1200 | 1 | 3.08E-08 | 20  | 1.667 | LOC106928785              |                      |
| DMRNW_015095572.1:401    | NW_015095572.1 | 401    | 1600   | 1200 | 2 | 2.77E-14 | 62  | 5.167 |                           |                      |
| DMRNW_015095582.1:42501  | NW_015095582.1 | 42501  | 43900  | 1400 | 1 | 4.50E-08 | 54  | 3.857 | slit3                     | Development          |
| DMRNW_015095582.1:283201 | NW_015095582.1 | 283201 | 284300 | 1100 | 1 | 1.04E-09 | 49  | 4.455 | slit3                     | Development          |
| DMRNW_015095584.1:13901  | NW_015095584.1 | 13901  | 15000  | 1100 | 4 | 4.71E-12 | 44  | 4     |                           |                      |
| DMRNW_015095587.1:202201 | NW_015095587.1 | 202201 | 206600 | 4400 | 1 | 5.19E-08 | 68  | 1.545 | LOC106928983              |                      |
| DMRNW_015095590.1:163601 | NW_015095590.1 | 163601 | 165400 | 1800 | 7 | 7.70E-30 | 51  | 2.833 | col11a1                   |                      |
| DMRNW_015095596.1:40201  | NW_015095596.1 | 40201  | 41200  | 1000 | 1 | 1.61E-10 | 82  | 8.2   | LOC106929083              |                      |
| DMRNW_015095596.1:202901 | NW_015095596.1 | 202901 | 204700 | 1800 | 3 | 5.41E-13 | 54  | 3     |                           |                      |
| DMRNW_015095596.1:464601 | NW_015095596.1 | 464601 | 465100 | 500  | 1 | 1.01E-08 | 16  | 3.2   |                           |                      |
| DMRNW_015095603.1:136701 | NW_015095603.1 | 136701 | 136800 | 100  | 1 | 3.32E-12 | 0   | 0     | LOC106929144              |                      |
| DMRNW_015095605.1:11101  | NW_015095605.1 | 11101  | 14400  | 3300 | 1 | 1.58E-11 | 122 | 3.697 | LOC106929151;LOC106929152 |                      |
| DMRNW_015095606.1:119401 | NW_015095606.1 | 119401 | 122600 | 3200 | 1 | 1.21E-08 | 63  | 1.969 |                           |                      |
| DMRNW_015095608.1:207201 | NW_015095608.1 | 207201 | 210100 | 2900 | 1 | 3.30E-09 | 69  | 2.379 |                           |                      |
| DMRNW_015095610.1:83801  | NW_015095610.1 | 83801  | 88200  | 4400 | 1 | 1.56E-11 | 75  | 1.705 | fam171a1                  |                      |
| DMRNW_015095612.1:189401 | NW_015095612.1 | 189401 | 191900 | 2500 | 1 | 2.93E-10 | 43  | 1.72  | kif20b                    | Cytoskeleton         |
| DMRNW_015095616.1:10901  | NW_015095616.1 | 10901  | 12400  | 1500 | 1 | 8.45E-16 | 21  | 1.4   | LOC106929241              |                      |
| DMRNW_015095617.1:193601 | NW_015095617.1 | 193601 | 195200 | 1600 | 1 | 9.18E-08 | 43  | 2.688 | col4a6                    | Extracellular Matrix |
| DMRNW_015095617.1:277801 | NW_015095617.1 | 277801 | 279800 | 2000 | 1 | 5.28E-09 | 80  | 4     | col4a6                    | Extracellular Matrix |
| DMRNW_015095617.1:283201 | NW_015095617.1 | 283201 | 283500 | 300  | 1 | 1.71E-10 | 12  | 4     | ankrd46                   |                      |
| DMRNW_015095617.1:309201 | NW_015095617.1 | 309201 | 309900 | 700  | 2 | 3.67E-15 | 22  | 3.143 | LOC106929246              |                      |
| DMRNW_015095625.1:168901 | NW_015095625.1 | 168901 | 169200 | 300  | 1 | 2.86E-12 | 2   | 0.667 |                           |                      |
| DMRNW_015095625.1:203201 | NW_015095625.1 | 203201 | 203500 | 300  | 1 | 1.97E-08 | 1   | 0.333 | LOC106929331              |                      |
| DMRNW_015095626.1:74801  | NW_015095626.1 | 74801  | 76200  | 1400 | 3 | 1.47E-16 | 59  | 4.214 | dab1                      | Signaling            |
| DMRNW_015095632.1:47801  | NW_015095632.1 | 47801  | 48600  | 800  | 2 | 4.66E-09 | 17  | 2.125 | ipo11                     | Transport            |
| DMRNW_015095633.1:24701  | NW_015095633.1 | 24701  | 27500  | 2800 | 3 | 4.90E-09 | 46  | 1.643 |                           |                      |
| DMRNW_015095635.1:147701 | NW_015095635.1 | 147701 | 148700 | 1000 | 1 | 5.60E-09 | 8   | 0.8   | LOC106929410              |                      |
| DMRNW_015095640.1:69101  | NW_015095640.1 | 69101  | 69400  | 300  | 2 | 4.84E-21 | 0   | 0     | dcc                       | Receptor             |
| DMRNW_015095640.1:73201  | NW_015095640.1 | 73201  | 76700  | 3500 | 1 | 5.59E-09 | 175 | 5     | dcc                       | Receptor             |
| DMRNW_015095640.1:157701 | NW_015095640.1 | 157701 | 162100 | 4400 | 2 | 1.59E-21 | 167 | 3.795 | dcc                       | Receptor             |
| DMRNW_015095640.1:234901 | NW_015095640.1 | 234901 | 237500 | 2600 | 1 | 9.53E-09 | 81  | 3.115 | dcc                       | Receptor             |
| DMRNW_015095668.1:92301  | NW_015095668.1 | 92301  | 92700  | 400  | 1 | 6.40E-08 | 14  | 3.5   | LOC106929700              |                      |
| DMRNW_015095672.1:98601  | NW_015095672.1 | 98601  | 100200 | 1600 | 4 | 1.24E-17 | 49  | 3.062 | scara5                    | Unknown              |
| DMRNW_015095673.1:90501  | NW_015095673.1 | 90501  | 91000  | 500  | 3 | 1.12E-15 | 0   | 0     | LOC106929732              |                      |
| DMRNW_015095674.1:86201  | NW_015095674.1 | 86201  | 95700  | 9500 | 1 | 3.66E-09 | 213 | 2.242 | ebi3;LOC106929741         | Receptor             |
| DMRNW_015095675.1:232701 | NW_015095675.1 | 232701 | 232900 | 200  | 1 | 2.11E-13 | 12  | 6     | LOC106929746              |                      |
| DMRNW_015095675.1:256801 | NW_015095675.1 | 256801 | 258700 | 1900 | 1 | 4.29E-09 | 66  | 3.474 | LOC106929745              |                      |
| DMRNW_015095676.1:71201  | NW_015095676.1 | 71201  | 79500  | 8300 | 1 | 7.55E-11 | 229 | 2.759 | LOC106929762              |                      |
| DMRNW_015095677.1:167201 | NW_015095677.1 | 167201 | 172000 | 4800 | 1 | 6.17E-15 | 66  | 1.375 | LOC106929785              |                      |
| DMRNW_015095686.1:20301  | NW_015095686.1 | 20301  | 22300  | 2000 | 1 | 2.53E-09 | 26  | 1.3   | adam12                    | Protease             |
| DMRNW_015095686.1:91801  | NW_015095686.1 | 91801  | 95200  | 3400 | 3 | 2.94E-17 | 112 | 3.294 | dhx32                     | Transcription        |
| DMRNW_015095687.1:257201 | NW_015095687.1 | 257201 | 257400 | 200  | 1 | 2.63E-08 | 5   | 2.5   |                           |                      |
| DMRNW_015095687.1:272001 | NW_015095687.1 | 272001 | 272800 | 800  | 2 | 2.01E-18 | 23  | 2.875 |                           |                      |
| DMRNW_015095691.1:214601 | NW_015095691.1 | 214601 | 214800 | 200  | 1 | 8.45E-09 | 4   | 2     | LOC106929866              |                      |
| DMRNW_015095691.1:305801 | NW_015095691.1 | 305801 | 306400 | 600  | 1 | 3.70E-10 | 28  | 4.667 | LOC106929874              |                      |
| DMRNW_015095694.1:37501  | NW_015095694.1 | 37501  | 38300  | 800  | 1 | 7.14E-10 | 36  | 4.5   | cnksr1                    | Signaling            |
| DMRNW_015095694.1:78601  | NW_015095694.1 | 78601  | 78900  | 300  | 2 | 3.97E-13 | 2   | 0.667 | LOC106929905              |                      |
| DMRNW_015095697.1:100201 | NW_015095697.1 | 100201 | 101300 | 1100 | 1 | 1.36E-08 | 17  | 1.545 | LOC106929927              |                      |
| DMRNW_015095705.1:18001  | NW_015095705.1 | 18001  | 20800  | 2800 | 2 | 2.29E-15 | 78  | 2.786 |                           |                      |
| DMRNW_015095707.1:47701  | NW_015095707.1 | 47701  | 48000  | 300  | 1 | 1.71E-13 | 4   | 1.333 |                           |                      |
| DMRNW_015095709.1:185801 | NW_015095709.1 | 185801 | 187700 | 1900 | 1 | 2.15E-08 | 80  | 4.211 |                           |                      |
| DMRNW_015095720.1:48101  | NW_015095720.1 | 48101  | 49200  | 1100 | 3 | 2.62E-14 | 20  | 1.818 |                           |                      |
| DMRNW_015095724.1:64601  | NW_015095724.1 | 64601  | 67400  | 2800 | 1 | 1.03E-08 | 64  | 2.286 |                           |                      |
| DMRNW_015095728.1:50901  | NW_015095728.1 | 50901  | 53200  | 2300 | 1 | 3.76E-08 | 81  | 3.522 |                           |                      |
| DMRNW_015095728.1:114301 | NW_015095728.1 | 114301 | 116900 | 2600 | 1 | 4.15E-09 | 40  | 1.538 |                           |                      |
| DMRNW_015095734.1:601    | NW_015095734.1 | 601    | 1500   | 900  | 1 | 1.68E-08 | 25  | 2.778 | LOC106930297              |                      |
| DMRNW_015095738.1:96401  | NW_015095738.1 | 96401  | 99600  | 3200 | 1 | 3.27E-10 | 97  | 3.031 | LOC106930345              |                      |
| DMRNW_015095738.1:131001 | NW_015095738.1 | 131001 | 133100 | 2100 | 1 | 5.40E-10 | 36  | 1.714 | LOC106930346              |                      |
| DMRNW_015095739.1:36101  | NW_015095739.1 | 36101  | 38900  | 2800 | 1 | 8.82E-12 | 78  | 2.786 | LOC106930351              |                      |
| DMRNW_015095745.1:164101 | NW_015095745.1 | 164101 | 166000 | 1900 | 1 | 7.08E-13 | 37  | 1.947 | socs5                     | Signaling            |
| DMRNW_015095747.1:35001  | NW_015095747.1 | 35001  | 38300  | 3300 | 5 | 2.26E-15 | 82  | 2.485 |                           |                      |
| DMRNW_015095748.1:17401  | NW_015095748.1 | 17401  | 22000  | 4600 | 1 | 4.10E-12 | 84  | 1.826 |                           |                      |
| DMRNW_015095751.1:104601 | NW_015095751.1 | 104601 | 109100 | 4500 | 2 | 6.54E-24 | 166 | 3.689 | efnb1;LOC106930480        | Signaling            |
| DMRNW_015095759.1:52101  | NW_015095759.1 | 52101  | 55400  | 3300 | 1 | 4.97E-09 | 28  | 0.848 | LOC106930545              |                      |
| DMRNW_015095760.1:157301 | NW_015095760.1 | 157301 | 157600 | 300  | 1 | 2.24E-20 | 3   | 1     |                           |                      |
| DMRNW_015095761.1:95401  | NW_015095761.1 | 95401  | 95600  | 200  | 1 | 1.49E-08 | 1   | 0.5   |                           |                      |
| DMRNW_015095765.1:167601 | NW_015095765.1 | 167601 | 169000 | 1400 | 1 | 1.10E-08 | 16  | 1.143 | tmef2                     | Signaling            |
| DMRNW_015095769.1:13801  | NW_015095769.1 | 13801  | 17100  | 3300 | 1 | 8.88E-08 | 71  | 2.152 |                           |                      |
| DMRNW_015095769.1:23501  | NW_015095769.1 | 23501  | 29400  | 5900 | 1 | 5.60E-09 | 114 | 1.932 | LOC106930616              |                      |
| DMRNW_015095769.1:30401  | NW_015095769.1 | 30401  | 32300  | 1900 | 1 | 2.00E-08 | 40  | 2.105 |                           |                      |

|                          |                |        |        |      |   |          |     |       |                           |               |
|--------------------------|----------------|--------|--------|------|---|----------|-----|-------|---------------------------|---------------|
| DMRNW_015095770.1:21701  | NW_015095770.1 | 21701  | 22800  | 1100 | 1 | 1.08E-09 | 18  | 1.636 |                           |               |
| DMRNW_015095775.1:118401 | NW_015095775.1 | 118401 | 119300 | 900  | 5 | 6.85E-17 | 52  | 5.778 | frmd5                     | Signaling     |
| DMRNW_015095779.1:84501  | NW_015095779.1 | 84501  | 85200  | 700  | 1 | 2.32E-10 | 17  | 2.429 | tnr                       | Cytoskeleton  |
| DMRNW_015095781.1:75501  | NW_015095781.1 | 75501  | 76100  | 600  | 3 | 2.00E-20 | 33  | 5.5   |                           |               |
| DMRNW_015095784.1:3001   | NW_015095784.1 | 3001   | 7800   | 4800 | 1 | 5.41E-08 | 104 | 2.167 |                           |               |
| DMRNW_015095784.1:133401 | NW_015095784.1 | 133401 | 136800 | 3400 | 1 | 3.48E-08 | 102 | 3     | LOC106930697              |               |
| DMRNW_015095786.1:53401  | NW_015095786.1 | 53401  | 55300  | 1900 | 1 | 3.59E-08 | 20  | 1.053 | tpcn1                     | Metabolism    |
| DMRNW_015095790.1:305301 | NW_015095790.1 | 305301 | 305500 | 200  | 1 | 6.98E-10 | 3   | 1.5   |                           |               |
| DMRNW_015095793.1:52101  | NW_015095793.1 | 52101  | 53400  | 1300 | 2 | 3.23E-09 | 46  | 3.538 |                           |               |
| DMRNW_015095795.1:67801  | NW_015095795.1 | 67801  | 76300  | 8500 | 1 | 2.34E-08 | 165 | 1.941 | LOC106930767              |               |
| DMRNW_015095796.1:69801  | NW_015095796.1 | 69801  | 70600  | 800  | 1 | 4.42E-08 | 26  | 3.25  |                           |               |
| DMRNW_015095798.1:79201  | NW_015095798.1 | 79201  | 82900  | 3700 | 1 | 5.51E-11 | 84  | 2.27  |                           |               |
| DMRNW_015095801.1:171301 | NW_015095801.1 | 171301 | 172600 | 1300 | 1 | 1.01E-15 | 36  | 2.769 |                           |               |
| DMRNW_015095808.1:58101  | NW_015095808.1 | 58101  | 59400  | 1300 | 3 | 1.97E-12 | 26  | 2     | slc1a7                    | Transport     |
| DMRNW_015095810.1:52101  | NW_015095810.1 | 52101  | 57900  | 5800 | 2 | 6.87E-09 | 152 | 2.621 | LOC106930858;LOC106930860 |               |
| DMRNW_015095811.1:112901 | NW_015095811.1 | 112901 | 116700 | 3800 | 1 | 1.28E-08 | 88  | 2.316 | LOC106930871              |               |
| DMRNW_015095819.1:197201 | NW_015095819.1 | 197201 | 199600 | 2400 | 2 | 9.66E-11 | 24  | 1     |                           |               |
| DMRNW_015095827.1:168301 | NW_015095827.1 | 168301 | 169800 | 1500 | 6 | 3.94E-12 | 81  | 5.4   | ovol1                     | Transcription |
| DMRNW_015095831.1:48701  | NW_015095831.1 | 48701  | 50800  | 2100 | 2 | 9.85E-23 | 40  | 1.905 |                           |               |
| DMRNW_015095832.1:303901 | NW_015095832.1 | 303901 | 305500 | 1600 | 1 | 2.20E-08 | 17  | 1.062 |                           |               |
| DMRNW_015095833.1:132301 | NW_015095833.1 | 132301 | 135000 | 2700 | 1 | 7.38E-08 | 57  | 2.111 | kcnb1                     | Transport     |
| DMRNW_015095841.1:110201 | NW_015095841.1 | 110201 | 111100 | 900  | 1 | 1.53E-09 | 14  | 1.556 |                           |               |
| DMRNW_015095851.1:139401 | NW_015095851.1 | 139401 | 140100 | 700  | 1 | 9.44E-10 | 37  | 5.286 |                           |               |
| DMRNW_015095851.1:173201 | NW_015095851.1 | 173201 | 173700 | 500  | 1 | 6.06E-10 | 26  | 5.2   |                           |               |
| DMRNW_015095859.1:56001  | NW_015095859.1 | 56001  | 56500  | 500  | 1 | 6.92E-10 | 9   | 1.8   | LOC106931285              |               |
| DMRNW_015095860.1:60001  | NW_015095860.1 | 60001  | 60300  | 300  | 1 | 8.03E-09 | 0   | 0     | LOC106931292              |               |
| DMRNW_015095863.1:111101 | NW_015095863.1 | 111101 | 111500 | 400  | 1 | 2.03E-11 | 5   | 1.25  | LOC106931312              |               |
| DMRNW_015095865.1:172001 | NW_015095865.1 | 172001 | 173700 | 1700 | 1 | 1.53E-08 | 35  | 2.059 |                           |               |
| DMRNW_015095867.1:3101   | NW_015095867.1 | 3101   | 5100   | 2000 | 1 | 3.00E-08 | 54  | 2.7   | LOC106931340              |               |
| DMRNW_015095870.1:24701  | NW_015095870.1 | 24701  | 27400  | 2700 | 2 | 1.32E-16 | 54  | 2     | larp4                     |               |
| DMRNW_015095872.1:118101 | NW_015095872.1 | 118101 | 120100 | 2000 | 1 | 2.79E-08 | 26  | 1.3   | LOC106931385              |               |
| DMRNW_015095875.1:271901 | NW_015095875.1 | 271901 | 273700 | 1800 | 1 | 1.33E-08 | 38  | 2.111 | LOC106931407              |               |
| DMRNW_015095879.1:74301  | NW_015095879.1 | 74301  | 76500  | 2200 | 1 | 7.67E-09 | 57  | 2.591 |                           |               |
| DMRNW_015095881.1:35801  | NW_015095881.1 | 35801  | 36500  | 700  | 1 | 3.32E-13 | 16  | 2.286 | LOC106931474              |               |
| DMRNW_015095881.1:164801 | NW_015095881.1 | 164801 | 167900 | 3100 | 1 | 9.98E-09 | 41  | 1.323 | LOC106931478              |               |
| DMRNW_015095888.1:71201  | NW_015095888.1 | 71201  | 72800  | 1600 | 4 | 2.12E-17 | 67  | 4.188 | gpr149                    |               |
| DMRNW_015095888.1:127101 | NW_015095888.1 | 127101 | 128000 | 900  | 2 | 7.81E-12 | 30  | 3.333 | dhx36                     | Transcription |
| DMRNW_015095889.1:109101 | NW_015095889.1 | 109101 | 109500 | 400  | 1 | 8.39E-08 | 8   | 2     | ralb                      |               |
| DMRNW_015095890.1:138801 | NW_015095890.1 | 138801 | 140200 | 1400 | 1 | 1.39E-08 | 29  | 2.071 | LOC106931550              |               |
| DMRNW_015095891.1:150401 | NW_015095891.1 | 150401 | 155300 | 4900 | 2 | 3.71E-10 | 134 | 2.735 | LOC106931553              |               |
| DMRNW_015095900.1:46701  | NW_015095900.1 | 46701  | 47000  | 300  | 1 | 3.34E-08 | 6   | 2     | srf                       | Transcription |
| DMRNW_015095901.1:72201  | NW_015095901.1 | 72201  | 73800  | 1600 | 1 | 2.98E-11 | 31  | 1.938 | neu1;LOC106931608         | Development   |
| DMRNW_015095909.1:131701 | NW_015095909.1 | 131701 | 134900 | 3200 | 1 | 1.22E-08 | 63  | 1.969 |                           |               |
| DMRNW_015095919.1:2001   | NW_015095919.1 | 2001   | 4900   | 2900 | 1 | 2.83E-08 | 24  | 0.828 | LOC106931759              |               |
| DMRNW_015095919.1:124101 | NW_015095919.1 | 124101 | 125400 | 1300 | 1 | 4.02E-09 | 63  | 4.846 | opn1sw                    | Receptor      |
| DMRNW_015095919.1:159901 | NW_015095919.1 | 159901 | 164300 | 4400 | 2 | 9.65E-14 | 120 | 2.727 | ncaph2                    |               |
| DMRNW_015095925.1:63201  | NW_015095925.1 | 63201  | 65900  | 2700 | 1 | 2.40E-08 | 29  | 1.074 |                           |               |
| DMRNW_015095930.1:82401  | NW_015095930.1 | 82401  | 82900  | 500  | 2 | 1.41E-08 | 7   | 1.4   |                           |               |
| DMRNW_015095933.1:62701  | NW_015095933.1 | 62701  | 63800  | 1100 | 1 | 9.10E-08 | 47  | 4.273 | gpr3                      |               |
| DMRNW_015095933.1:113401 | NW_015095933.1 | 113401 | 119200 | 5800 | 1 | 1.31E-11 | 165 | 2.845 | ahdc1;fgr                 |               |
| DMRNW_015095936.1:165901 | NW_015095936.1 | 165901 | 166957 | 1057 | 1 | 3.29E-08 | 17  | 1.608 |                           |               |
| DMRNW_015095937.1:74001  | NW_015095937.1 | 74001  | 74400  | 400  | 1 | 6.75E-10 | 8   | 2     |                           |               |
| DMRNW_015095941.1:264201 | NW_015095941.1 | 264201 | 264500 | 300  | 1 | 2.47E-08 | 11  | 3.667 | larp1                     |               |
| DMRNW_015095952.1:103901 | NW_015095952.1 | 103901 | 107600 | 3700 | 2 | 2.06E-11 | 112 | 3.027 | nop9                      |               |
| DMRNW_015095956.1:105601 | NW_015095956.1 | 105601 | 107500 | 1900 | 2 | 4.87E-12 | 41  | 2.158 | LOC106932022              |               |
| DMRNW_015095956.1:136901 | NW_015095956.1 | 136901 | 137500 | 600  | 1 | 1.51E-13 | 9   | 1.5   | LOC106932022;LOC106932024 |               |
| DMRNW_015095970.1:111601 | NW_015095970.1 | 111601 | 113600 | 2000 | 1 | 1.98E-13 | 26  | 1.3   | sbf1                      | Signaling     |
| DMRNW_015095971.1:20601  | NW_015095971.1 | 20601  | 22400  | 1800 | 1 | 1.17E-09 | 45  | 2.5   |                           |               |
| DMRNW_015095971.1:112001 | NW_015095971.1 | 112001 | 112300 | 300  | 1 | 9.11E-08 | 11  | 3.667 | LOC106932145              |               |
| DMRNW_015095975.1:109701 | NW_015095975.1 | 109701 | 115200 | 5500 | 1 | 7.09E-08 | 119 | 2.164 | atrn                      | Signaling     |
| DMRNW_015095978.1:1      | NW_015095978.1 | 1      | 100    | 100  | 1 | 7.70E-08 | 1   | 1     |                           |               |
| DMRNW_015095978.1:18901  | NW_015095978.1 | 18901  | 22500  | 3600 | 1 | 3.12E-09 | 108 | 3     | LOC106932212              |               |
| DMRNW_015095978.1:128101 | NW_015095978.1 | 128101 | 130500 | 2400 | 2 | 5.05E-08 | 69  | 2.875 | LOC106932214              |               |
| DMRNW_015095980.1:25301  | NW_015095980.1 | 25301  | 28600  | 3300 | 1 | 4.28E-10 | 127 | 3.848 |                           |               |
| DMRNW_015095982.1:1301   | NW_015095982.1 | 1301   | 7000   | 5700 | 3 | 3.55E-20 | 124 | 2.175 | LOC106932242              |               |
| DMRNW_015095982.1:14801  | NW_015095982.1 | 14801  | 16700  | 1900 | 1 | 8.40E-15 | 34  | 1.789 |                           |               |
| DMRNW_015095986.1:36301  | NW_015095986.1 | 36301  | 36700  | 400  | 2 | 3.27E-19 | 10  | 2.5   |                           |               |
| DMRNW_015095989.1:49501  | NW_015095989.1 | 49501  | 52000  | 2500 | 1 | 1.81E-09 | 62  | 2.48  |                           |               |
| DMRNW_015095989.1:110001 | NW_015095989.1 | 110001 | 111400 | 1400 | 1 | 1.31E-17 | 14  | 1     | itpr1                     | Signaling     |
| DMRNW_015095989.1:183301 | NW_015095989.1 | 183301 | 185300 | 2000 | 1 | 8.94E-09 | 35  | 1.75  | itpr1                     | Signaling     |



|                          |                |        |        |      |   |          |     |       |                           |               |
|--------------------------|----------------|--------|--------|------|---|----------|-----|-------|---------------------------|---------------|
| DMRNW_015095991.1:130401 | NW_015095991.1 | 130401 | 131700 | 1300 | 2 | 2.53E-09 | 13  | 1     | lig3                      | Transcription |
| DMRNW_015095994.1:118701 | NW_015095994.1 | 118701 | 120500 | 1800 | 1 | 7.99E-09 | 47  | 2.611 | nup205                    | Metabolism    |
| DMRNW_015095996.1:55101  | NW_015095996.1 | 55101  | 55600  | 500  | 1 | 3.69E-08 | 12  | 2.4   | LOC106932347              |               |
| DMRNW_015095996.1:58101  | NW_015095996.1 | 58101  | 63800  | 5700 | 4 | 8.89E-14 | 99  | 1.737 | LOC106932347              |               |
| DMRNW_015095996.1:67901  | NW_015095996.1 | 67901  | 68100  | 200  | 2 | 1.21E-17 | 0   | 0     |                           |               |
| DMRNW_015096001.1:119201 | NW_015096001.1 | 119201 | 122800 | 3600 | 2 | 2.95E-09 | 51  | 1.417 | rrp36                     |               |
| DMRNW_015096004.1:1      | NW_015096004.1 | 1      | 1200   | 1200 | 3 | 8.95E-10 | 7   | 0.583 |                           |               |
| DMRNW_015096005.1:136901 | NW_015096005.1 | 136901 | 138100 | 1200 | 1 | 2.27E-08 | 26  | 2.167 |                           |               |
| DMRNW_015096006.1:13101  | NW_015096006.1 | 13101  | 13500  | 400  | 2 | 3.31E-10 | 11  | 2.75  | lrfn5                     | Receptor      |
| DMRNW_015096009.1:66201  | NW_015096009.1 | 66201  | 67300  | 1100 | 1 | 4.40E-09 | 24  | 2.182 | LOC106932450              |               |
| DMRNW_015096012.1:81001  | NW_015096012.1 | 81001  | 84500  | 3500 | 1 | 1.41E-08 | 137 | 3.914 | sf3b1                     | Transcription |
| DMRNW_015096023.1:115201 | NW_015096023.1 | 115201 | 120300 | 5100 | 1 | 8.50E-08 | 42  | 0.824 |                           |               |
| DMRNW_015096029.1:11301  | NW_015096029.1 | 11301  | 12200  | 900  | 1 | 1.47E-08 | 12  | 1.333 |                           |               |
| DMRNW_015096031.1:54201  | NW_015096031.1 | 54201  | 56200  | 2000 | 1 | 1.64E-08 | 63  | 3.15  | ccdc171                   |               |
| DMRNW_015096031.1:114601 | NW_015096031.1 | 114601 | 117700 | 3100 | 1 | 4.02E-12 | 95  | 3.065 | LOC106932613              |               |
| DMRNW_015096039.1:10901  | NW_015096039.1 | 10901  | 13100  | 2200 | 1 | 9.66E-09 | 77  | 3.5   | tmem79                    |               |
| DMRNW_015096040.1:53501  | NW_015096040.1 | 53501  | 55500  | 2000 | 3 | 2.50E-30 | 33  | 1.65  | LOC106932722              |               |
| DMRNW_015096046.1:119501 | NW_015096046.1 | 119501 | 120100 | 600  | 1 | 9.62E-09 | 14  | 2.333 | ski                       | Transcription |
| DMRNW_015096047.1:20901  | NW_015096047.1 | 20901  | 22000  | 1100 | 2 | 7.81E-09 | 43  | 3.909 |                           |               |
| DMRNW_015096049.1:23401  | NW_015096049.1 | 23401  | 24900  | 1500 | 1 | 6.49E-08 | 28  | 1.867 | LOC106932787              |               |
| DMRNW_015096049.1:26201  | NW_015096049.1 | 26201  | 28400  | 2200 | 1 | 2.04E-08 | 34  | 1.545 | LOC106932787              |               |
| DMRNW_015096050.1:163001 | NW_015096050.1 | 163001 | 169700 | 6700 | 2 | 2.56E-10 | 196 | 2.925 | iqcj                      |               |
| DMRNW_015096057.1:55501  | NW_015096057.1 | 55501  | 57200  | 1700 | 1 | 1.20E-10 | 91  | 5.353 |                           |               |
| DMRNW_015096063.1:30801  | NW_015096063.1 | 30801  | 31300  | 500  | 1 | 5.86E-08 | 8   | 1.6   | LOC106932889              |               |
| DMRNW_015096064.1:22601  | NW_015096064.1 | 22601  | 23700  | 1100 | 1 | 2.32E-10 | 14  | 1.273 |                           |               |
| DMRNW_015096082.1:34301  | NW_015096082.1 | 34301  | 34800  | 500  | 1 | 7.45E-09 | 1   | 0.2   |                           |               |
| DMRNW_015096082.1:77901  | NW_015096082.1 | 77901  | 79400  | 1500 | 1 | 4.58E-10 | 38  | 2.533 | LOC106933027;LOC106933025 |               |
| DMRNW_015096082.1:93701  | NW_015096082.1 | 93701  | 96600  | 2900 | 1 | 1.22E-10 | 54  | 1.862 | LOC106933027;LOC106933028 |               |
| DMRNW_015096092.1:54301  | NW_015096092.1 | 54301  | 54700  | 400  | 2 | 5.48E-15 | 2   | 0.5   | LOC106933080;LOC106933081 |               |
| DMRNW_015096094.1:901    | NW_015096094.1 | 901    | 1300   | 400  | 1 | 8.25E-08 | 7   | 1.75  | LOC106933125;LOC106933126 |               |
| DMRNW_015096094.1:11001  | NW_015096094.1 | 11001  | 12500  | 1500 | 3 | 6.56E-10 | 41  | 2.733 | LOC106933126;LOC106933124 |               |
| DMRNW_015096094.1:17301  | NW_015096094.1 | 17301  | 17700  | 400  | 2 | 3.79E-18 | 6   | 1.5   | LOC106933126              |               |
| DMRNW_015096098.1:44901  | NW_015096098.1 | 44901  | 49400  | 4500 | 2 | 2.51E-09 | 175 | 3.889 | LOC106933155              |               |
| DMRNW_015096100.1:47401  | NW_015096100.1 | 47401  | 47800  | 400  | 1 | 2.43E-12 | 17  | 4.25  | LOC106933171              |               |
| DMRNW_015096103.1:90901  | NW_015096103.1 | 90901  | 93300  | 2400 | 4 | 1.36E-12 | 66  | 2.75  |                           |               |
| DMRNW_015096103.1:101101 | NW_015096103.1 | 101101 | 104600 | 3500 | 2 | 3.82E-11 | 103 | 2.943 | LOC106933189              |               |
| DMRNW_015096105.1:125101 | NW_015096105.1 | 125101 | 126300 | 1200 | 1 | 5.97E-10 | 6   | 0.5   | LOC106933220              |               |
| DMRNW_015096111.1:39301  | NW_015096111.1 | 39301  | 39800  | 500  | 1 | 7.21E-09 | 6   | 1.2   |                           |               |
| DMRNW_015096113.1:29901  | NW_015096113.1 | 29901  | 31200  | 1300 | 1 | 2.09E-10 | 11  | 0.846 | LOC106933277              |               |
| DMRNW_015096113.1:203301 | NW_015096113.1 | 203301 | 206200 | 2900 | 1 | 2.00E-09 | 70  | 2.414 | LOC106933279              |               |
| DMRNW_015096121.1:10701  | NW_015096121.1 | 10701  | 11900  | 1200 | 1 | 7.15E-08 | 19  | 1.583 |                           |               |
| DMRNW_015096138.1:92401  | NW_015096138.1 | 92401  | 94100  | 1700 | 1 | 2.00E-08 | 27  | 1.588 | col14a1                   |               |
| DMRNW_015096138.1:101101 | NW_015096138.1 | 101101 | 102200 | 1100 | 1 | 1.01E-08 | 22  | 2     | col14a1                   |               |
| DMRNW_015096143.1:35301  | NW_015096143.1 | 35301  | 37600  | 2300 | 1 | 2.95E-10 | 32  | 1.391 | LOC106933474              |               |
| DMRNW_015096147.1:42001  | NW_015096147.1 | 42001  | 42600  | 600  | 1 | 1.34E-08 | 16  | 2.667 |                           |               |
| DMRNW_015096147.1:96101  | NW_015096147.1 | 96101  | 96800  | 700  | 1 | 3.48E-08 | 28  | 4     | LOC106933501;LOC106933500 |               |
| DMRNW_015096147.1:100601 | NW_015096147.1 | 100601 | 102600 | 2000 | 1 | 7.70E-08 | 44  | 2.2   | LOC106933499              |               |
| DMRNW_015096148.1:92701  | NW_015096148.1 | 92701  | 94200  | 1500 | 1 | 7.04E-08 | 14  | 0.933 | LOC106933507              |               |
| DMRNW_015096152.1:15401  | NW_015096152.1 | 15401  | 17200  | 1800 | 1 | 2.16E-09 | 29  | 1.611 |                           |               |
| DMRNW_015096153.1:75801  | NW_015096153.1 | 75801  | 78600  | 2800 | 1 | 1.29E-10 | 85  | 3.036 | LOC106933541              |               |
| DMRNW_015096156.1:183901 | NW_015096156.1 | 183901 | 186400 | 2500 | 1 | 1.83E-13 | 30  | 1.2   | axin1                     | Signaling     |
| DMRNW_015096161.1:134401 | NW_015096161.1 | 134401 | 135600 | 1200 | 1 | 7.75E-08 | 19  | 1.583 |                           |               |
| DMRNW_015096172.1:99101  | NW_015096172.1 | 99101  | 100700 | 1600 | 1 | 5.57E-08 | 55  | 3.438 |                           |               |
| DMRNW_015096177.1:140501 | NW_015096177.1 | 140501 | 141700 | 1200 | 7 | 2.59E-27 | 60  | 5     | LOC106933689              |               |
| DMRNW_015096188.1:68701  | NW_015096188.1 | 68701  | 68900  | 200  | 2 | 7.74E-09 | 2   | 1     | tmem117                   | Unknown       |
| DMRNW_015096188.1:95901  | NW_015096188.1 | 95901  | 96900  | 1000 | 1 | 9.53E-10 | 32  | 3.2   |                           |               |
| DMRNW_015096194.1:11701  | NW_015096194.1 | 11701  | 12600  | 900  | 1 | 1.37E-11 | 22  | 2.444 | LOC106933792              |               |
| DMRNW_015096196.1:136901 | NW_015096196.1 | 136901 | 138800 | 1900 | 1 | 5.28E-08 | 80  | 4.211 |                           |               |
| DMRNW_015096199.1:58801  | NW_015096199.1 | 58801  | 61800  | 3000 | 2 | 2.26E-14 | 75  | 2.5   | LOC106933830              |               |
| DMRNW_015096201.1:12301  | NW_015096201.1 | 12301  | 15600  | 3300 | 1 | 8.84E-09 | 87  | 2.636 | LOC106933848              |               |
| DMRNW_015096201.1:41801  | NW_015096201.1 | 41801  | 46400  | 4600 | 1 | 1.36E-08 | 94  | 2.043 | anapc1                    | Cell Cycle    |
| DMRNW_015096201.1:47701  | NW_015096201.1 | 47701  | 48600  | 900  | 2 | 1.29E-09 | 24  | 2.667 | anapc1                    | Cell Cycle    |
| DMRNW_015096202.1:103001 | NW_015096202.1 | 103001 | 105000 | 2000 | 1 | 1.89E-10 | 27  | 1.35  | LOC106933855              |               |
| DMRNW_015096205.1:46901  | NW_015096205.1 | 46901  | 48400  | 1500 | 2 | 8.70E-20 | 33  | 2.2   | cdh20                     | Cytoskeleton  |
| DMRNW_015096208.1:125001 | NW_015096208.1 | 125001 | 125500 | 500  | 1 | 3.40E-10 | 37  | 7.4   | inadl;LOC106933912        | Cytoskeleton  |
| DMRNW_015096210.1:117301 | NW_015096210.1 | 117301 | 118700 | 1400 | 2 | 9.78E-12 | 19  | 1.357 |                           |               |
| DMRNW_015096215.1:16001  | NW_015096215.1 | 16001  | 18200  | 2200 | 3 | 2.24E-13 | 62  | 2.818 |                           |               |
| DMRNW_015096216.1:69201  | NW_015096216.1 | 69201  | 76500  | 7300 | 1 | 7.91E-08 | 186 | 2.548 |                           |               |
| DMRNW_015096217.1:106401 | NW_015096217.1 | 106401 | 107200 | 800  | 1 | 2.26E-08 | 7   | 0.875 |                           |               |
| DMRNW_015096222.1:95001  | NW_015096222.1 | 95001  | 95500  | 500  | 2 | 5.11E-16 | 24  | 4.8   |                           |               |

|                          |                |        |        |      |   |          |     |       |                           |               |
|--------------------------|----------------|--------|--------|------|---|----------|-----|-------|---------------------------|---------------|
| DMRNW_015096222.1:105701 | NW_015096222.1 | 105701 | 112300 | 6600 | 1 | 1.60E-09 | 219 | 3.318 |                           |               |
| DMRNW_015096225.1:95701  | NW_015096225.1 | 95701  | 96900  | 1200 | 1 | 3.84E-10 | 29  | 2.417 |                           |               |
| DMRNW_015096228.1:16901  | NW_015096228.1 | 16901  | 17200  | 300  | 1 | 9.16E-08 | 5   | 1.667 | LOC106934024              |               |
| DMRNW_015096228.1:46701  | NW_015096228.1 | 46701  | 48800  | 2100 | 1 | 3.58E-08 | 31  | 1.476 |                           |               |
| DMRNW_015096229.1:91401  | NW_015096229.1 | 91401  | 91700  | 300  | 1 | 1.99E-09 | 2   | 0.667 | LOC106934037;LOC106934036 |               |
| DMRNW_015096230.1:15101  | NW_015096230.1 | 15101  | 15300  | 200  | 1 | 5.71E-08 | 8   | 4     | LOC106934046              |               |
| DMRNW_015096230.1:23301  | NW_015096230.1 | 23301  | 23500  | 200  | 1 | 2.52E-11 | 0   | 0     | LOC106934046              |               |
| DMRNW_015096230.1:28301  | NW_015096230.1 | 28301  | 29800  | 1500 | 2 | 1.27E-21 | 35  | 2.333 | LOC106934041              |               |
| DMRNW_015096230.1:120701 | NW_015096230.1 | 120701 | 121000 | 300  | 2 | 1.09E-16 | 18  | 6     | LOC106934044              |               |
| DMRNW_015096231.1:15501  | NW_015096231.1 | 15501  | 16400  | 900  | 1 | 1.67E-08 | 42  | 4.667 | LOC106934051              |               |
| DMRNW_015096245.1:44201  | NW_015096245.1 | 44201  | 45500  | 1300 | 1 | 4.64E-08 | 8   | 0.615 |                           |               |
| DMRNW_015096246.1:45601  | NW_015096246.1 | 45601  | 46000  | 400  | 2 | 4.46E-19 | 6   | 1.5   | lyrm4                     |               |
| DMRNW_015096246.1:58701  | NW_015096246.1 | 58701  | 60600  | 1900 | 1 | 5.84E-08 | 70  | 3.684 | lyrm4                     |               |
| DMRNW_015096246.1:67701  | NW_015096246.1 | 67701  | 68100  | 400  | 1 | 8.64E-15 | 14  | 3.5   | lyrm4                     |               |
| DMRNW_015096246.1:106201 | NW_015096246.1 | 106201 | 109200 | 3000 | 1 | 8.17E-09 | 110 | 3.667 | fars2                     |               |
| DMRNW_015096247.1:1      | NW_015096247.1 | 1      | 6400   | 6400 | 3 | 2.01E-10 | 123 | 1.922 |                           |               |
| DMRNW_015096247.1:28201  | NW_015096247.1 | 28201  | 34000  | 5800 | 1 | 6.90E-08 | 119 | 2.052 | LOC106934173;slc35e2b     | Transport     |
| DMRNW_015096257.1:35301  | NW_015096257.1 | 35301  | 36000  | 700  | 1 | 1.29E-08 | 48  | 6.857 | LOC106934239              |               |
| DMRNW_015096257.1:72001  | NW_015096257.1 | 72001  | 74400  | 2400 | 1 | 6.62E-08 | 102 | 4.25  | csrp2bp                   |               |
| DMRNW_015096258.1:73701  | NW_015096258.1 | 73701  | 75200  | 1500 | 1 | 2.15E-08 | 49  | 3.267 | drc7                      |               |
| DMRNW_015096258.1:132501 | NW_015096258.1 | 132501 | 132800 | 300  | 1 | 8.95E-08 | 4   | 1.333 |                           |               |
| DMRNW_015096258.1:134501 | NW_015096258.1 | 134501 | 134862 | 362  | 3 | 9.38E-21 | 12  | 3.315 |                           |               |
| DMRNW_015096263.1:14201  | NW_015096263.1 | 14201  | 14500  | 300  | 1 | 2.32E-09 | 14  | 4.667 | LOC106934294              |               |
| DMRNW_015096263.1:215701 | NW_015096263.1 | 215701 | 216600 | 900  | 4 | 2.05E-22 | 15  | 1.667 |                           |               |
| DMRNW_015096265.1:32801  | NW_015096265.1 | 32801  | 35200  | 2400 | 1 | 6.19E-08 | 57  | 2.375 | LOC106934321              |               |
| DMRNW_015096280.1:89901  | NW_015096280.1 | 89901  | 90100  | 200  | 1 | 3.63E-11 | 1   | 0.5   |                           |               |
| DMRNW_015096284.1:70401  | NW_015096284.1 | 70401  | 71100  | 700  | 5 | 3.85E-21 | 29  | 4.143 |                           |               |
| DMRNW_015096288.1:20101  | NW_015096288.1 | 20101  | 20500  | 400  | 2 | 6.20E-12 | 12  | 3     |                           |               |
| DMRNW_015096290.1:43201  | NW_015096290.1 | 43201  | 43400  | 200  | 1 | 7.75E-10 | 9   | 4.5   |                           |               |
| DMRNW_015096290.1:44901  | NW_015096290.1 | 44901  | 47800  | 2900 | 1 | 2.65E-11 | 68  | 2.345 |                           |               |
| DMRNW_015096293.1:230901 | NW_015096293.1 | 230901 | 231912 | 1012 | 5 | 6.50E-16 | 58  | 5.731 |                           |               |
| DMRNW_015096295.1:115701 | NW_015096295.1 | 115701 | 120000 | 4300 | 2 | 4.33E-09 | 209 | 4.86  | med16;LOC106903341        | Transcription |
| DMRNW_015096295.1:131401 | NW_015096295.1 | 131401 | 131600 | 200  | 1 | 4.16E-10 | 9   | 4.5   |                           |               |
| DMRNW_015096296.1:129701 | NW_015096296.1 | 129701 | 130500 | 800  | 4 | 9.77E-11 | 57  | 7.125 |                           |               |
| DMRNW_015096302.1:1      | NW_015096302.1 | 1      | 3600   | 3600 | 1 | 2.31E-51 | 171 | 4.75  |                           |               |
| DMRNW_015096302.1:14201  | NW_015096302.1 | 14201  | 18900  | 4700 | 1 | 7.72E-12 | 331 | 7.043 |                           |               |
| DMRNW_015096302.1:54201  | NW_015096302.1 | 54201  | 57100  | 2900 | 4 | 6.93E-12 | 171 | 5.897 |                           |               |
| DMRNW_015096302.1:81001  | NW_015096302.1 | 81001  | 81400  | 400  | 1 | 6.31E-08 | 24  | 6     |                           |               |
| DMRNW_015096309.1:80301  | NW_015096309.1 | 80301  | 82400  | 2100 | 2 | 3.08E-11 | 25  | 1.19  | LOC106903427              |               |
| DMRNW_015096312.1:47501  | NW_015096312.1 | 47501  | 48300  | 800  | 1 | 1.06E-09 | 18  | 2.25  | LOC106903436              |               |
| DMRNW_015096317.1:93501  | NW_015096317.1 | 93501  | 99900  | 6400 | 2 | 1.00E-08 | 79  | 1.234 | LOC106903459;LOC106903461 |               |
| DMRNW_015096319.1:96201  | NW_015096319.1 | 96201  | 99100  | 2900 | 2 | 4.66E-15 | 115 | 3.966 |                           |               |
| DMRNW_015096328.1:113501 | NW_015096328.1 | 113501 | 117100 | 3600 | 1 | 7.96E-15 | 117 | 3.25  | ssuh2                     |               |
| DMRNW_015096333.1:161201 | NW_015096333.1 | 161201 | 162600 | 1400 | 2 | 1.78E-08 | 32  | 2.286 |                           |               |
| DMRNW_015096335.1:187901 | NW_015096335.1 | 187901 | 189200 | 1300 | 1 | 2.65E-08 | 89  | 6.846 | wdr90                     | Unknown       |
| DMRNW_015096335.1:193201 | NW_015096335.1 | 193201 | 193600 | 400  | 1 | 1.05E-08 | 37  | 9.25  | wdr90                     | Unknown       |
| DMRNW_015096337.1:16301  | NW_015096337.1 | 16301  | 19000  | 2700 | 1 | 1.91E-11 | 98  | 3.63  | xpo4                      | Metabolism    |
| DMRNW_015096337.1:113201 | NW_015096337.1 | 113201 | 113600 | 400  | 1 | 5.19E-09 | 17  | 4.25  | cryl1                     | Metabolism    |
| DMRNW_015096340.1:130601 | NW_015096340.1 | 130601 | 133700 | 3100 | 1 | 7.25E-10 | 73  | 2.355 | LOC106903632;LOC106903631 |               |
| DMRNW_015096345.1:129601 | NW_015096345.1 | 129601 | 130500 | 900  | 1 | 2.18E-09 | 32  | 3.556 | LOC106903671              |               |
| DMRNW_015096348.1:25001  | NW_015096348.1 | 25001  | 26600  | 1600 | 1 | 2.06E-11 | 26  | 1.625 |                           |               |
| DMRNW_015096348.1:146401 | NW_015096348.1 | 146401 | 147700 | 1300 | 2 | 2.16E-11 | 16  | 1.231 | pih1d1                    | Signaling     |
| DMRNW_015096354.1:75801  | NW_015096354.1 | 75801  | 76400  | 600  | 3 | 2.29E-11 | 12  | 2     |                           |               |
| DMRNW_015096355.1:110801 | NW_015096355.1 | 110801 | 112700 | 1900 | 1 | 2.90E-11 | 68  | 3.579 | fbn1                      | Development   |
| DMRNW_015096368.1:68701  | NW_015096368.1 | 68701  | 69000  | 300  | 1 | 6.18E-11 | 9   | 3     | rnf212b                   |               |
| DMRNW_015096375.1:53701  | NW_015096375.1 | 53701  | 54300  | 600  | 1 | 2.04E-08 | 13  | 2.167 | nek10                     | Signaling     |
| DMRNW_015096375.1:72901  | NW_015096375.1 | 72901  | 73400  | 500  | 1 | 9.89E-10 | 4   | 0.8   | LOC106903866              |               |
| DMRNW_015096393.1:137201 | NW_015096393.1 | 137201 | 137372 | 172  | 1 | 1.41E-08 | 6   | 3.488 |                           |               |
| DMRNW_015096394.1:75101  | NW_015096394.1 | 75101  | 75400  | 300  | 1 | 9.78E-08 | 6   | 2     |                           |               |
| DMRNW_015096397.1:175801 | NW_015096397.1 | 175801 | 179100 | 3300 | 1 | 8.29E-08 | 77  | 2.333 | LOC106904003              |               |
| DMRNW_015096399.1:41601  | NW_015096399.1 | 41601  | 44100  | 2500 | 1 | 3.22E-08 | 57  | 2.28  | LOC106904022              |               |
| DMRNW_015096401.1:4901   | NW_015096401.1 | 4901   | 5300   | 400  | 2 | 1.86E-08 | 3   | 0.75  | hpse                      | Metabolism    |
| DMRNW_015096409.1:39101  | NW_015096409.1 | 39101  | 40200  | 1100 | 3 | 4.96E-18 | 39  | 3.545 | LOC106904084              |               |
| DMRNW_015096411.1:66401  | NW_015096411.1 | 66401  | 68300  | 1900 | 1 | 8.51E-11 | 72  | 3.789 | LOC106904101              |               |
| DMRNW_015096412.1:34601  | NW_015096412.1 | 34601  | 34900  | 300  | 1 | 4.51E-09 | 6   | 2     | LOC106904111              |               |
| DMRNW_015096414.1:41001  | NW_015096414.1 | 41001  | 42000  | 1000 | 1 | 9.54E-08 | 22  | 2.2   | LOC106904132              |               |
| DMRNW_015096420.1:66801  | NW_015096420.1 | 66801  | 67000  | 200  | 1 | 1.47E-08 | 0   | 0     | LOC106904174;efemp2       | Signaling     |
| DMRNW_015096422.1:82201  | NW_015096422.1 | 82201  | 87100  | 4900 | 1 | 1.52E-10 | 135 | 2.755 | tmprss3                   | Protease      |
| DMRNW_015096424.1:29701  | NW_015096424.1 | 29701  | 32400  | 2700 | 1 | 4.28E-08 | 99  | 3.667 |                           |               |
| DMRNW_015096424.1:110301 | NW_015096424.1 | 110301 | 110600 | 300  | 1 | 5.79E-08 | 10  | 3.333 |                           |               |

|                          |                |        |        |      |   |          |     |       |                           |                            |
|--------------------------|----------------|--------|--------|------|---|----------|-----|-------|---------------------------|----------------------------|
| DMRNW_015096428.1:21901  | NW_015096428.1 | 21901  | 22100  | 200  | 1 | 4.27E-08 | 1   | 0.5   |                           |                            |
| DMRNW_015096428.1:65501  | NW_015096428.1 | 65501  | 66200  | 700  | 4 | 3.00E-46 | 18  | 2.571 | LOC106904219;LOC106904222 |                            |
| DMRNW_015096442.1:1001   | NW_015096442.1 | 1001   | 1600   | 600  | 1 | 2.36E-09 | 5   | 0.833 | LOC106904306              |                            |
| DMRNW_015096443.1:37801  | NW_015096443.1 | 37801  | 39600  | 1800 | 3 | 6.05E-13 | 55  | 3.056 | LOC106904313              |                            |
| DMRNW_015096446.1:11501  | NW_015096446.1 | 11501  | 12400  | 900  | 1 | 2.55E-09 | 10  | 1.111 |                           |                            |
| DMRNW_015096449.1:13701  | NW_015096449.1 | 13701  | 16400  | 2700 | 1 | 4.61E-10 | 72  | 2.667 |                           |                            |
| DMRNW_015096449.1:19801  | NW_015096449.1 | 19801  | 24100  | 4300 | 2 | 6.90E-11 | 106 | 2.465 |                           |                            |
| DMRNW_015096453.1:48501  | NW_015096453.1 | 48501  | 49800  | 1300 | 2 | 1.63E-08 | 29  | 2.231 | LOC106904354              |                            |
| DMRNW_015096475.1:112101 | NW_015096475.1 | 112101 | 115400 | 3300 | 7 | 4.26E-21 | 65  | 1.97  | ppm1e                     | Signaling                  |
| DMRNW_015096475.1:151901 | NW_015096475.1 | 151901 | 153200 | 1300 | 2 | 5.39E-10 | 43  | 3.308 | ppm1e                     | Signaling                  |
| DMRNW_015096475.1:182901 | NW_015096475.1 | 182901 | 186900 | 4000 | 1 | 5.53E-08 | 107 | 2.675 | ppm1e                     | Signaling                  |
| DMRNW_015096476.1:53501  | NW_015096476.1 | 53501  | 53900  | 400  | 1 | 4.59E-08 | 18  | 4.5   |                           |                            |
| DMRNW_015096488.1:7501   | NW_015096488.1 | 7501   | 7800   | 300  | 2 | 2.11E-12 | 13  | 4.333 | LOC106904537              |                            |
| DMRNW_015096488.1:153501 | NW_015096488.1 | 153501 | 154700 | 1200 | 4 | 1.43E-12 | 40  | 3.333 |                           |                            |
| DMRNW_015096489.1:115101 | NW_015096489.1 | 115101 | 117271 | 2171 | 4 | 2.75E-23 | 57  | 2.626 |                           |                            |
| DMRNW_015096493.1:149401 | NW_015096493.1 | 149401 | 149900 | 500  | 1 | 3.62E-08 | 8   | 1.6   | LOC106904550              |                            |
| DMRNW_015096501.1:25601  | NW_015096501.1 | 25601  | 25800  | 200  | 1 | 2.78E-10 | 0   | 0     |                           |                            |
| DMRNW_015096502.1:101    | NW_015096502.1 | 101    | 2700   | 2600 | 2 | 2.99E-11 | 45  | 1.731 |                           |                            |
| DMRNW_015096502.1:7401   | NW_015096502.1 | 7401   | 11700  | 4300 | 1 | 6.07E-09 | 74  | 1.721 |                           |                            |
| DMRNW_015096502.1:12701  | NW_015096502.1 | 12701  | 15100  | 2400 | 4 | 4.00E-09 | 69  | 2.875 |                           |                            |
| DMRNW_015096507.1:37301  | NW_015096507.1 | 37301  | 37700  | 400  | 1 | 3.24E-10 | 14  | 3.5   | camta2                    |                            |
| DMRNW_015096513.1:203701 | NW_015096513.1 | 203701 | 206400 | 2700 | 2 | 3.23E-10 | 46  | 1.704 | LOC106904681              |                            |
| DMRNW_015096513.1:218201 | NW_015096513.1 | 218201 | 219046 | 846  | 2 | 6.71E-10 | 41  | 4.846 |                           |                            |
| DMRNW_015096514.1:109301 | NW_015096514.1 | 109301 | 109700 | 400  | 1 | 7.55E-21 | 25  | 6.25  | LOC106904686              |                            |
| DMRNW_015096514.1:142901 | NW_015096514.1 | 142901 | 143947 | 1047 | 1 | 2.01E-08 | 24  | 2.292 | LOC106904690              |                            |
| DMRNW_015096515.1:32701  | NW_015096515.1 | 32701  | 33800  | 1100 | 2 | 3.42E-10 | 8   | 0.727 |                           |                            |
| DMRNW_015096517.1:11701  | NW_015096517.1 | 11701  | 14800  | 3100 | 2 | 2.65E-14 | 102 | 3.29  | dlx3                      | Transcription              |
| DMRNW_015096518.1:76601  | NW_015096518.1 | 76601  | 79900  | 3300 | 1 | 2.13E-09 | 56  | 1.697 |                           |                            |
| DMRNW_015096522.1:42201  | NW_015096522.1 | 42201  | 44300  | 2100 | 1 | 7.34E-08 | 37  | 1.762 | LOC106904732              |                            |
| DMRNW_015096529.1:95301  | NW_015096529.1 | 95301  | 95800  | 500  | 1 | 8.29E-10 | 11  | 2.2   |                           |                            |
| DMRNW_015096533.1:67301  | NW_015096533.1 | 67301  | 69200  | 1900 | 1 | 2.41E-09 | 74  | 3.895 | rnf19a                    |                            |
| DMRNW_015096535.1:27401  | NW_015096535.1 | 27401  | 28600  | 1200 | 1 | 5.80E-08 | 21  | 1.75  | LOC106904824              |                            |
| DMRNW_015096541.1:15101  | NW_015096541.1 | 15101  | 15800  | 700  | 2 | 9.29E-13 | 8   | 1.143 |                           |                            |
| DMRNW_015096544.1:111701 | NW_015096544.1 | 111701 | 112600 | 900  | 1 | 3.85E-09 | 20  | 2.222 |                           |                            |
| DMRNW_015096556.1:78001  | NW_015096556.1 | 78001  | 81500  | 3500 | 1 | 1.65E-08 | 42  | 1.2   |                           |                            |
| DMRNW_015096562.1:9401   | NW_015096562.1 | 9401   | 9600   | 200  | 1 | 1.12E-10 | 22  | 11    | LOC106904965              |                            |
| DMRNW_015096568.1:68701  | NW_015096568.1 | 68701  | 70400  | 1700 | 1 | 2.24E-08 | 18  | 1.059 |                           |                            |
| DMRNW_015096568.1:76301  | NW_015096568.1 | 76301  | 77300  | 1000 | 1 | 4.25E-10 | 4   | 0.4   |                           |                            |
| DMRNW_015096569.1:48101  | NW_015096569.1 | 48101  | 50700  | 2600 | 1 | 8.85E-08 | 39  | 1.5   | LOC106904985              |                            |
| DMRNW_015096571.1:51601  | NW_015096571.1 | 51601  | 52800  | 1200 | 2 | 7.63E-11 | 43  | 3.583 | LOC106904996              |                            |
| DMRNW_015096572.1:22901  | NW_015096572.1 | 22901  | 24100  | 1200 | 1 | 2.19E-08 | 19  | 1.583 | LOC106905004              |                            |
| DMRNW_015096575.1:14101  | NW_015096575.1 | 14101  | 16200  | 2100 | 1 | 2.06E-08 | 24  | 1.143 |                           |                            |
| DMRNW_015096578.1:37201  | NW_015096578.1 | 37201  | 38500  | 1300 | 1 | 7.72E-08 | 20  | 1.538 | LOC106905042              |                            |
| DMRNW_015096578.1:39501  | NW_015096578.1 | 39501  | 40100  | 600  | 1 | 4.06E-08 | 5   | 0.833 | LOC106905042              |                            |
| DMRNW_015096590.1:7201   | NW_015096590.1 | 7201   | 7600   | 400  | 2 | 3.42E-26 | 10  | 2.5   | eya2                      | Development                |
| DMRNW_015096599.1:49701  | NW_015096599.1 | 49701  | 50300  | 600  | 1 | 6.43E-08 | 8   | 1.333 | LOC106905168              |                            |
| DMRNW_015096600.1:39301  | NW_015096600.1 | 39301  | 45900  | 6600 | 6 | 3.02E-16 | 114 | 1.727 | dnajc16;casp9             | Transcription;Proteas<br>e |
| DMRNW_015096605.1:7101   | NW_015096605.1 | 7101   | 11500  | 4400 | 2 | 2.01E-08 | 102 | 2.318 |                           |                            |
| DMRNW_015096605.1:15501  | NW_015096605.1 | 15501  | 22600  | 7100 | 1 | 1.46E-08 | 145 | 2.042 | LOC106905197              |                            |
| DMRNW_015096606.1:54301  | NW_015096606.1 | 54301  | 57200  | 2900 | 1 | 4.21E-08 | 43  | 1.483 | ccser2                    |                            |
| DMRNW_015096616.1:71001  | NW_015096616.1 | 71001  | 74400  | 3400 | 1 | 4.42E-08 | 134 | 3.941 | rps6ka3                   |                            |
| DMRNW_015096617.1:31901  | NW_015096617.1 | 31901  | 36500  | 4600 | 1 | 9.66E-08 | 82  | 1.783 | LOC106905274              |                            |
| DMRNW_015096621.1:49201  | NW_015096621.1 | 49201  | 53400  | 4200 | 1 | 8.97E-08 | 269 | 6.405 | herc1                     | Signaling                  |
| DMRNW_015096621.1:85601  | NW_015096621.1 | 85601  | 86100  | 500  | 1 | 9.54E-14 | 7   | 1.4   | herc1                     | Signaling                  |
| DMRNW_015096621.1:105301 | NW_015096621.1 | 105301 | 105500 | 200  | 1 | 5.20E-19 | 0   | 0     | herc1                     | Signaling                  |
| DMRNW_015096621.1:109801 | NW_015096621.1 | 109801 | 110400 | 600  | 2 | 6.94E-36 | 2   | 0.333 | herc1                     | Signaling                  |
| DMRNW_015096628.1:59601  | NW_015096628.1 | 59601  | 62600  | 3000 | 2 | 1.54E-10 | 118 | 3.933 | LOC106905319              |                            |
| DMRNW_015096628.1:67501  | NW_015096628.1 | 67501  | 69100  | 1600 | 1 | 4.98E-14 | 33  | 2.062 | LOC106905319              |                            |
| DMRNW_015096629.1:59501  | NW_015096629.1 | 59501  | 60100  | 600  | 2 | 1.67E-10 | 5   | 0.833 | LOC106905325              |                            |
| DMRNW_015096631.1:101    | NW_015096631.1 | 101    | 900    | 800  | 2 | 6.86E-09 | 31  | 3.875 |                           |                            |
| DMRNW_015096639.1:31301  | NW_015096639.1 | 31301  | 31700  | 400  | 1 | 5.20E-08 | 4   | 1     | LOC106905384              |                            |
| DMRNW_015096654.1:72701  | NW_015096654.1 | 72701  | 73600  | 900  | 1 | 2.02E-10 | 20  | 2.222 | sap30bp                   | Transcription              |
| DMRNW_015096655.1:1001   | NW_015096655.1 | 1001   | 2300   | 1300 | 1 | 2.84E-10 | 42  | 3.231 |                           |                            |
| DMRNW_015096655.1:39701  | NW_015096655.1 | 39701  | 42100  | 2400 | 3 | 7.94E-10 | 98  | 4.083 |                           |                            |
| DMRNW_015096656.1:37701  | NW_015096656.1 | 37701  | 41600  | 3900 | 2 | 1.02E-13 | 88  | 2.256 |                           |                            |
| DMRNW_015096666.1:133401 | NW_015096666.1 | 133401 | 136900 | 3500 | 6 | 3.48E-12 | 94  | 2.686 | LOC106905533              |                            |
| DMRNW_015096673.1:20401  | NW_015096673.1 | 20401  | 20800  | 400  | 2 | 5.65E-10 | 3   | 0.75  | LOC106905578              |                            |
| DMRNW_015096700.1:20001  | NW_015096700.1 | 20001  | 20600  | 600  | 1 | 8.04E-08 | 9   | 1.5   |                           |                            |
| DMRNW_015096703.1:52901  | NW_015096703.1 | 52901  | 54400  | 1500 | 1 | 3.26E-10 | 56  | 3.733 | usp34                     | Protease                   |

|                          |                |        |        |       |    |          |     |       |                           |                      |
|--------------------------|----------------|--------|--------|-------|----|----------|-----|-------|---------------------------|----------------------|
| DMRNW_015096713.1:48101  | NW_015096713.1 | 48101  | 54100  | 6000  | 2  | 1.67E-13 | 130 | 2.167 |                           |                      |
| DMRNW_015096716.1:71101  | NW_015096716.1 | 71101  | 72300  | 12000 | 1  | 1.01E-08 | 39  | 3.25  | LOC106905779              |                      |
| DMRNW_015096722.1:53501  | NW_015096722.1 | 53501  | 57800  | 4300  | 2  | 1.84E-16 | 82  | 1.907 |                           |                      |
| DMRNW_015096722.1:68701  | NW_015096722.1 | 68701  | 69400  | 700   | 1  | 3.47E-18 | 35  | 5     |                           |                      |
| DMRNW_015096726.1:60401  | NW_015096726.1 | 60401  | 61300  | 900   | 1  | 1.83E-09 | 26  | 2.889 |                           |                      |
| DMRNW_015096730.1:81201  | NW_015096730.1 | 81201  | 82300  | 1100  | 2  | 3.13E-13 | 20  | 1.818 |                           |                      |
| DMRNW_015096749.1:34101  | NW_015096749.1 | 34101  | 34800  | 700   | 1  | 3.48E-13 | 0   | 0     |                           |                      |
| DMRNW_015096751.1:5601   | NW_015096751.1 | 5601   | 10500  | 4900  | 1  | 5.95E-09 | 269 | 5.49  | trrap                     | Signaling            |
| DMRNW_015096755.1:98001  | NW_015096755.1 | 98001  | 98700  | 700   | 5  | 4.91E-12 | 14  | 2     |                           |                      |
| DMRNW_015096756.1:1      | NW_015096756.1 | 1      | 1300   | 1300  | 2  | 8.84E-11 | 47  | 3.615 |                           |                      |
| DMRNW_015096759.1:6801   | NW_015096759.1 | 6801   | 11300  | 4500  | 1  | 5.34E-08 | 160 | 3.556 |                           |                      |
| DMRNW_015096759.1:95801  | NW_015096759.1 | 95801  | 96600  | 800   | 1  | 2.07E-08 | 9   | 1.125 | LOC106905943              |                      |
| DMRNW_015096760.1:44701  | NW_015096760.1 | 44701  | 47200  | 2500  | 2  | 5.48E-32 | 48  | 1.92  | LOC106905949              |                      |
| DMRNW_015096761.1:61101  | NW_015096761.1 | 61101  | 62500  | 1400  | 5  | 1.03E-15 | 33  | 2.357 |                           |                      |
| DMRNW_015096762.1:89801  | NW_015096762.1 | 89801  | 93400  | 3600  | 1  | 2.90E-08 | 57  | 1.583 |                           |                      |
| DMRNW_015096765.1:8101   | NW_015096765.1 | 8101   | 11400  | 3300  | 1  | 1.20E-08 | 108 | 3.273 |                           |                      |
| DMRNW_015096766.1:3801   | NW_015096766.1 | 3801   | 4100   | 300   | 1  | 8.81E-16 | 6   | 2     |                           |                      |
| DMRNW_015096766.1:14801  | NW_015096766.1 | 14801  | 16300  | 1500  | 3  | 3.25E-16 | 11  | 0.733 | LOC106905969              |                      |
| DMRNW_015096770.1:7801   | NW_015096770.1 | 7801   | 11000  | 3200  | 2  | 9.89E-11 | 144 | 4.5   |                           |                      |
| DMRNW_015096770.1:15901  | NW_015096770.1 | 15901  | 17300  | 1400  | 2  | 1.50E-13 | 78  | 5.571 |                           |                      |
| DMRNW_015096775.1:1      | NW_015096775.1 | 1      | 800    | 800   | 1  | 8.03E-08 | 14  | 1.75  |                           |                      |
| DMRNW_015096775.1:4701   | NW_015096775.1 | 4701   | 5800   | 1100  | 1  | 3.36E-08 | 15  | 1.364 |                           |                      |
| DMRNW_015096782.1:10501  | NW_015096782.1 | 10501  | 10800  | 300   | 1  | 9.35E-08 | 4   | 1.333 | LOC106906075              |                      |
| DMRNW_015096783.1:8901   | NW_015096783.1 | 8901   | 9900   | 1000  | 1  | 3.07E-10 | 25  | 2.5   | pomgnt1                   | Metabolism           |
| DMRNW_015096783.1:39401  | NW_015096783.1 | 39401  | 42200  | 2800  | 2  | 4.41E-10 | 73  | 2.607 |                           |                      |
| DMRNW_015096783.1:45701  | NW_015096783.1 | 45701  | 46900  | 1200  | 1  | 6.42E-10 | 31  | 2.583 |                           |                      |
| DMRNW_015096783.1:50901  | NW_015096783.1 | 50901  | 56600  | 5700  | 2  | 6.25E-11 | 157 | 2.754 |                           |                      |
| DMRNW_015096786.1:14001  | NW_015096786.1 | 14001  | 14500  | 500   | 1  | 4.88E-08 | 3   | 0.6   | LOC106906083              |                      |
| DMRNW_015096788.1:12301  | NW_015096788.1 | 12301  | 13800  | 1500  | 1  | 4.99E-08 | 13  | 0.867 |                           |                      |
| DMRNW_015096795.1:140101 | NW_015096795.1 | 140101 | 140300 | 200   | 1  | 2.06E-08 | 4   | 2     |                           |                      |
| DMRNW_015096800.1:4801   | NW_015096800.1 | 4801   | 5700   | 900   | 1  | 6.86E-09 | 9   | 1     |                           |                      |
| DMRNW_015096808.1:71801  | NW_015096808.1 | 71801  | 72500  | 700   | 2  | 4.46E-08 | 21  | 3     |                           |                      |
| DMRNW_015096810.1:43501  | NW_015096810.1 | 43501  | 45700  | 2200  | 2  | 1.82E-18 | 26  | 1.182 |                           |                      |
| DMRNW_015096815.1:66601  | NW_015096815.1 | 66601  | 70500  | 3900  | 8  | 3.04E-14 | 118 | 3.026 | LOC106906217              |                      |
| DMRNW_015096819.1:27001  | NW_015096819.1 | 27001  | 28500  | 1500  | 1  | 1.91E-10 | 24  | 1.6   | LOC106906235              |                      |
| DMRNW_015096823.1:34901  | NW_015096823.1 | 34901  | 35200  | 300   | 2  | 6.83E-10 | 0   | 0     | fat1                      | Extracellular Matrix |
| DMRNW_015096824.1:92101  | NW_015096824.1 | 92101  | 93800  | 1700  | 2  | 2.30E-11 | 90  | 5.294 |                           |                      |
| DMRNW_015096826.1:34801  | NW_015096826.1 | 34801  | 38100  | 3300  | 2  | 3.89E-09 | 78  | 2.364 |                           |                      |
| DMRNW_015096826.1:58701  | NW_015096826.1 | 58701  | 59800  | 1100  | 1  | 8.67E-08 | 45  | 4.091 |                           |                      |
| DMRNW_015096828.1:1      | NW_015096828.1 | 1      | 600    | 600   | 2  | 1.03E-09 | 5   | 0.833 |                           |                      |
| DMRNW_015096841.1:37301  | NW_015096841.1 | 37301  | 39400  | 2100  | 2  | 1.11E-16 | 74  | 3.524 |                           |                      |
| DMRNW_015096843.1:79401  | NW_015096843.1 | 79401  | 81100  | 1700  | 2  | 1.04E-09 | 30  | 1.765 | LOC106906323              |                      |
| DMRNW_015096853.1:89601  | NW_015096853.1 | 89601  | 93020  | 3420  | 1  | 4.99E-08 | 79  | 2.31  |                           |                      |
| DMRNW_015096855.1:2101   | NW_015096855.1 | 2101   | 3600   | 1500  | 1  | 1.75E-09 | 46  | 3.067 | LOC106906381              |                      |
| DMRNW_015096856.1:18501  | NW_015096856.1 | 18501  | 19400  | 900   | 6  | 8.06E-12 | 52  | 5.778 | psck9                     | Protease             |
| DMRNW_015096869.1:7501   | NW_015096869.1 | 7501   | 8100   | 600   | 1  | 1.17E-09 | 12  | 2     |                           |                      |
| DMRNW_015096869.1:40401  | NW_015096869.1 | 40401  | 41800  | 1400  | 1  | 1.76E-08 | 12  | 0.857 | LOC106906444              |                      |
| DMRNW_015096870.1:84901  | NW_015096870.1 | 84901  | 86400  | 1500  | 3  | 6.38E-09 | 50  | 3.333 | LOC106906450              |                      |
| DMRNW_015096878.1:79601  | NW_015096878.1 | 79601  | 82200  | 2600  | 2  | 3.61E-14 | 133 | 5.115 | LOC106906496              |                      |
| DMRNW_015096886.1:8401   | NW_015096886.1 | 8401   | 9800   | 1400  | 1  | 8.37E-08 | 40  | 2.857 | LOC106906524              |                      |
| DMRNW_015096896.1:86101  | NW_015096896.1 | 86101  | 91200  | 5100  | 17 | 6.29E-28 | 186 | 3.647 |                           |                      |
| DMRNW_015096904.1:186701 | NW_015096904.1 | 186701 | 187500 | 800   | 1  | 4.72E-08 | 33  | 4.125 |                           |                      |
| DMRNW_015096904.1:226101 | NW_015096904.1 | 226101 | 229200 | 3100  | 2  | 1.78E-09 | 70  | 2.258 |                           |                      |
| DMRNW_015096914.1:24301  | NW_015096914.1 | 24301  | 25600  | 1300  | 1  | 1.14E-14 | 43  | 3.308 | LOC106906650;LOC106906651 |                      |
| DMRNW_015096916.1:61201  | NW_015096916.1 | 61201  | 61500  | 300   | 2  | 4.51E-16 | 3   | 1     |                           |                      |
| DMRNW_015096917.1:35801  | NW_015096917.1 | 35801  | 37400  | 1600  | 1  | 6.94E-15 | 51  | 3.188 |                           |                      |
| DMRNW_015096926.1:1      | NW_015096926.1 | 1      | 1700   | 1700  | 2  | 7.03E-10 | 84  | 4.941 |                           |                      |
| DMRNW_015096926.1:34701  | NW_015096926.1 | 34701  | 37700  | 3000  | 2  | 2.60E-11 | 88  | 2.933 | LOC106906720;LOC106906718 |                      |
| DMRNW_015096929.1:16701  | NW_015096929.1 | 16701  | 17700  | 1000  | 1  | 8.48E-13 | 18  | 1.8   | LOC106906732              |                      |
| DMRNW_015096929.1:58601  | NW_015096929.1 | 58601  | 59600  | 1000  | 6  | 1.08E-12 | 47  | 4.7   | LOC106906731              |                      |
| DMRNW_015096929.1:67201  | NW_015096929.1 | 67201  | 69100  | 1900  | 7  | 2.85E-21 | 43  | 2.263 | LOC106906729              |                      |
| DMRNW_015096929.1:73501  | NW_015096929.1 | 73501  | 81800  | 8300  | 19 | 2.79E-57 | 179 | 2.157 | LOC106906729              |                      |
| DMRNW_015096943.1:60601  | NW_015096943.1 | 60601  | 65500  | 4900  | 1  | 6.52E-08 | 93  | 1.898 | LOC106906807              |                      |
| DMRNW_015096948.1:53801  | NW_015096948.1 | 53801  | 54600  | 800   | 1  | 8.12E-10 | 17  | 2.125 | slc41a1                   | Transport            |
| DMRNW_015096951.1:69501  | NW_015096951.1 | 69501  | 70900  | 1400  | 2  | 4.72E-13 | 23  | 1.643 |                           |                      |
| DMRNW_015096964.1:1      | NW_015096964.1 | 1      | 600    | 600   | 4  | 6.04E-11 | 21  | 3.5   |                           |                      |
| DMRNW_015096968.1:122201 | NW_015096968.1 | 122201 | 122900 | 700   | 1  | 2.96E-09 | 39  | 5.571 |                           |                      |
| DMRNW_015096974.1:47001  | NW_015096974.1 | 47001  | 47300  | 300   | 1  | 1.31E-08 | 16  | 5.333 | thbs3                     | Signaling            |
| DMRNW_015096984.1:701    | NW_015096984.1 | 701    | 1200   | 500   | 1  | 1.21E-09 | 9   | 1.8   |                           |                      |
| DMRNW_015096990.1:77901  | NW_015096990.1 | 77901  | 83100  | 5200  | 1  | 4.11E-08 | 120 | 2.308 |                           |                      |

|                          |                |        |        |      |   |          |     |       |                           |               |
|--------------------------|----------------|--------|--------|------|---|----------|-----|-------|---------------------------|---------------|
| DMRNW_015097001.1:74001  | NW_015097001.1 | 74001  | 74300  | 300  | 1 | 4.15E-13 | 13  | 4.333 |                           |               |
| DMRNW_015097006.1:71701  | NW_015097006.1 | 71701  | 72800  | 1100 | 3 | 4.96E-12 | 17  | 1.545 |                           |               |
| DMRNW_015097007.1:6301   | NW_015097007.1 | 6301   | 8200   | 1900 | 3 | 3.15E-34 | 32  | 1.684 |                           |               |
| DMRNW_015097007.1:14901  | NW_015097007.1 | 14901  | 18100  | 3200 | 1 | 4.72E-08 | 36  | 1.125 |                           |               |
| DMRNW_015097007.1:79301  | NW_015097007.1 | 79301  | 80800  | 1500 | 1 | 1.04E-09 | 19  | 1.267 | LOC106907079              |               |
| DMRNW_015097013.1:31401  | NW_015097013.1 | 31401  | 31900  | 500  | 1 | 1.45E-08 | 17  | 3.4   | LOC106907114              |               |
| DMRNW_015097022.1:44601  | NW_015097022.1 | 44601  | 45400  | 800  | 1 | 1.51E-10 | 28  | 3.5   | acss3                     | Metabolism    |
| DMRNW_015097029.1:49301  | NW_015097029.1 | 49301  | 52000  | 2700 | 5 | 1.06E-26 | 120 | 4.444 |                           |               |
| DMRNW_015097029.1:71801  | NW_015097029.1 | 71801  | 73100  | 1300 | 2 | 1.29E-14 | 14  | 1.077 |                           |               |
| DMRNW_015097030.1:74701  | NW_015097030.1 | 74701  | 75100  | 400  | 2 | 2.19E-09 | 14  | 3.5   |                           |               |
| DMRNW_015097037.1:14101  | NW_015097037.1 | 14101  | 17200  | 3100 | 3 | 4.28E-28 | 80  | 2.581 |                           |               |
| DMRNW_015097037.1:60601  | NW_015097037.1 | 60601  | 61400  | 800  | 1 | 6.32E-08 | 12  | 1.5   |                           |               |
| DMRNW_015097037.1:67601  | NW_015097037.1 | 67601  | 68000  | 400  | 3 | 5.13E-81 | 0   | 0     | LOC106907194              |               |
| DMRNW_015097037.1:72401  | NW_015097037.1 | 72401  | 73800  | 1400 | 3 | 5.63E-82 | 18  | 1.286 | LOC106907194              |               |
| DMRNW_015097052.1:137501 | NW_015097052.1 | 137501 | 139500 | 2000 | 4 | 1.16E-27 | 33  | 1.65  | LOC106907255              |               |
| DMRNW_015097053.1:65201  | NW_015097053.1 | 65201  | 65400  | 200  | 1 | 3.50E-09 | 7   | 3.5   | LOC106907257              |               |
| DMRNW_015097054.1:31501  | NW_015097054.1 | 31501  | 32900  | 1400 | 1 | 8.66E-09 | 18  | 1.286 | LOC106907261;LOC106907262 |               |
| DMRNW_015097054.1:36201  | NW_015097054.1 | 36201  | 40500  | 4300 | 1 | 5.80E-08 | 84  | 1.953 | LOC106907260              |               |
| DMRNW_015097054.1:54201  | NW_015097054.1 | 54201  | 54800  | 600  | 2 | 3.60E-16 | 12  | 2     |                           |               |
| DMRNW_015097056.1:21501  | NW_015097056.1 | 21501  | 23200  | 1700 | 2 | 4.40E-09 | 66  | 3.882 |                           |               |
| DMRNW_015097069.1:41601  | NW_015097069.1 | 41601  | 42500  | 900  | 1 | 1.08E-09 | 42  | 4.667 | LOC106907318              |               |
| DMRNW_015097072.1:32801  | NW_015097072.1 | 32801  | 38000  | 5200 | 1 | 4.04E-09 | 238 | 4.577 | LOC106907338              |               |
| DMRNW_015097088.1:64101  | NW_015097088.1 | 64101  | 64500  | 400  | 1 | 9.17E-09 | 22  | 5.5   | phf21b                    |               |
| DMRNW_015097089.1:76201  | NW_015097089.1 | 76201  | 76800  | 600  | 1 | 4.59E-08 | 1   | 0.167 | clspn                     |               |
| DMRNW_015097089.1:93401  | NW_015097089.1 | 93401  | 94500  | 1100 | 1 | 1.41E-11 | 46  | 4.182 | LOC106907404              |               |
| DMRNW_015097089.1:116301 | NW_015097089.1 | 116301 | 116700 | 400  | 2 | 1.55E-11 | 0   | 0     | LOC106907411;LOC106907412 |               |
| DMRNW_015097089.1:120401 | NW_015097089.1 | 120401 | 121400 | 1000 | 2 | 2.64E-35 | 18  | 1.8   | LOC106907411;LOC106907412 |               |
| DMRNW_015097089.1:136201 | NW_015097089.1 | 136201 | 137700 | 1500 | 2 | 4.25E-22 | 25  | 1.667 | LOC106907411;LOC106907412 |               |
| DMRNW_015097097.1:32101  | NW_015097097.1 | 32101  | 32500  | 400  | 2 | 1.45E-09 | 0   | 0     | rab24                     | Signaling     |
| DMRNW_015097097.1:76201  | NW_015097097.1 | 76201  | 76600  | 400  | 1 | 4.29E-08 | 9   | 2.25  |                           |               |
| DMRNW_015097104.1:20601  | NW_015097104.1 | 20601  | 25100  | 4500 | 4 | 6.60E-10 | 220 | 4.889 |                           |               |
| DMRNW_015097104.1:41101  | NW_015097104.1 | 41101  | 44200  | 3100 | 2 | 1.25E-20 | 232 | 7.484 |                           |               |
| DMRNW_015097105.1:72101  | NW_015097105.1 | 72101  | 72800  | 700  | 1 | 6.01E-08 | 12  | 1.714 | LOC106907483              |               |
| DMRNW_015097107.1:65101  | NW_015097107.1 | 65101  | 67700  | 2600 | 1 | 1.37E-08 | 65  | 2.5   |                           |               |
| DMRNW_015097123.1:2901   | NW_015097123.1 | 2901   | 4000   | 1100 | 2 | 1.35E-09 | 27  | 2.455 | LOC106907551              |               |
| DMRNW_015097125.1:52201  | NW_015097125.1 | 52201  | 52900  | 700  | 1 | 1.78E-13 | 12  | 1.714 |                           |               |
| DMRNW_015097135.1:901    | NW_015097135.1 | 901    | 2300   | 1400 | 1 | 1.39E-08 | 36  | 2.571 | LOC106907601              |               |
| DMRNW_015097149.1:50201  | NW_015097149.1 | 50201  | 51100  | 900  | 1 | 1.24E-13 | 40  | 4.444 | LOC106907691;LOC106907692 |               |
| DMRNW_015097158.1:33001  | NW_015097158.1 | 33001  | 36200  | 3200 | 1 | 8.38E-10 | 79  | 2.469 | LOC106907722              |               |
| DMRNW_015097191.1:53701  | NW_015097191.1 | 53701  | 54600  | 900  | 1 | 2.79E-12 | 24  | 2.667 |                           |               |
| DMRNW_015097195.1:101    | NW_015097195.1 | 101    | 700    | 600  | 1 | 2.05E-09 | 21  | 3.5   |                           |               |
| DMRNW_015097195.1:280001 | NW_015097195.1 | 280001 | 282600 | 2600 | 2 | 1.61E-10 | 63  | 2.423 |                           |               |
| DMRNW_015097208.1:1      | NW_015097208.1 | 1      | 600    | 600  | 1 | 6.97E-08 | 17  | 2.833 | LOC106907945              |               |
| DMRNW_015097208.1:6301   | NW_015097208.1 | 6301   | 7200   | 900  | 1 | 7.78E-10 | 23  | 2.556 | LOC106907945              |               |
| DMRNW_015097209.1:3501   | NW_015097209.1 | 3501   | 6500   | 3000 | 1 | 3.22E-10 | 94  | 3.133 | LOC106907950              |               |
| DMRNW_015097221.1:68201  | NW_015097221.1 | 68201  | 68600  | 400  | 1 | 1.69E-09 | 3   | 0.75  |                           |               |
| DMRNW_015097221.1:69801  | NW_015097221.1 | 69801  | 72800  | 3000 | 3 | 2.16E-19 | 76  | 2.533 |                           |               |
| DMRNW_015097228.1:21801  | NW_015097228.1 | 21801  | 22800  | 1000 | 1 | 1.21E-09 | 25  | 2.5   | LOC106908038              |               |
| DMRNW_015097231.1:66801  | NW_015097231.1 | 66801  | 67400  | 600  | 1 | 1.02E-08 | 25  | 4.167 |                           |               |
| DMRNW_015097235.1:67101  | NW_015097235.1 | 67101  | 68300  | 1200 | 1 | 2.07E-08 | 43  | 3.583 | LOC106908059              |               |
| DMRNW_015097236.1:23101  | NW_015097236.1 | 23101  | 25500  | 2400 | 1 | 3.17E-08 | 32  | 1.333 | LOC106908070              |               |
| DMRNW_015097236.1:85401  | NW_015097236.1 | 85401  | 85800  | 400  | 1 | 2.31E-08 | 4   | 1     |                           |               |
| DMRNW_015097241.1:42501  | NW_015097241.1 | 42501  | 42600  | 100  | 1 | 8.88E-08 | 1   | 1     |                           |               |
| DMRNW_015097242.1:20001  | NW_015097242.1 | 20001  | 20300  | 300  | 1 | 1.46E-08 | 10  | 3.333 | LOC106908083              |               |
| DMRNW_015097253.1:116001 | NW_015097253.1 | 116001 | 116200 | 200  | 1 | 5.66E-13 | 2   | 1     |                           |               |
| DMRNW_015097254.1:35001  | NW_015097254.1 | 35001  | 37500  | 2500 | 2 | 5.66E-19 | 35  | 1.4   | LOC106908141;LOC106908140 |               |
| DMRNW_015097254.1:41201  | NW_015097254.1 | 41201  | 44400  | 3200 | 2 | 5.85E-12 | 90  | 2.812 | LOC106908141;LOC106908140 |               |
| DMRNW_015097260.1:20401  | NW_015097260.1 | 20401  | 21600  | 1200 | 1 | 2.20E-11 | 14  | 1.167 |                           |               |
| DMRNW_015097260.1:92601  | NW_015097260.1 | 92601  | 93500  | 900  | 1 | 7.93E-12 | 49  | 5.444 | LOC106908156              |               |
| DMRNW_015097264.1:75001  | NW_015097264.1 | 75001  | 76500  | 1500 | 1 | 8.13E-09 | 40  | 2.667 | tnfrsf21                  | Apoptosis     |
| DMRNW_015097270.1:50901  | NW_015097270.1 | 50901  | 51800  | 900  | 1 | 1.22E-09 | 10  | 1.111 |                           |               |
| DMRNW_015097271.1:71401  | NW_015097271.1 | 71401  | 71700  | 300  | 1 | 9.26E-12 | 9   | 3     | nub1                      |               |
| DMRNW_015097271.1:74501  | NW_015097271.1 | 74501  | 77500  | 3000 | 1 | 9.55E-12 | 149 | 4.967 | nub1                      |               |
| DMRNW_015097272.1:29401  | NW_015097272.1 | 29401  | 32500  | 3100 | 1 | 7.01E-08 | 76  | 2.452 |                           |               |
| DMRNW_015097272.1:34701  | NW_015097272.1 | 34701  | 35100  | 400  | 1 | 9.98E-10 | 9   | 2.25  |                           |               |
| DMRNW_015097287.1:62201  | NW_015097287.1 | 62201  | 65200  | 3000 | 3 | 2.95E-14 | 53  | 1.767 | LOC106908246              |               |
| DMRNW_015097289.1:20701  | NW_015097289.1 | 20701  | 21000  | 300  | 1 | 2.65E-08 | 5   | 1.667 | LOC106908250              |               |
| DMRNW_015097291.1:49801  | NW_015097291.1 | 49801  | 52600  | 2800 | 1 | 7.39E-09 | 82  | 2.929 | lats2                     | Transcription |
| DMRNW_015097293.1:101    | NW_015097293.1 | 101    | 800    | 700  | 2 | 2.30E-09 | 22  | 3.143 |                           |               |
| DMRNW_015097293.1:2701   | NW_015097293.1 | 2701   | 4800   | 2100 | 1 | 8.24E-10 | 37  | 1.762 |                           |               |
| DMRNW_015097293.1:27101  | NW_015097293.1 | 27101  | 27600  | 500  | 1 | 9.11E-08 | 27  | 5.4   | LOC106908265              |               |

|                         |                |       |       |       |    |          |     |       |                      |                      |
|-------------------------|----------------|-------|-------|-------|----|----------|-----|-------|----------------------|----------------------|
| DMRNW_015097297.1:6401  | NW_015097297.1 | 6401  | 8800  | 2400  | 2  | 1.96E-09 | 39  | 1.625 | LOC106908272         |                      |
| DMRNW_015097297.1:11101 | NW_015097297.1 | 11101 | 15300 | 4200  | 1  | 5.20E-10 | 59  | 1.405 | LOC106908272         |                      |
| DMRNW_015097303.1:301   | NW_015097303.1 | 301   | 1300  | 1000  | 2  | 6.19E-12 | 31  | 3.1   |                      |                      |
| DMRNW_015097306.1:95701 | NW_015097306.1 | 95701 | 96900 | 1200  | 1  | 9.07E-09 | 23  | 1.917 |                      |                      |
| DMRNW_015097308.1:7901  | NW_015097308.1 | 7901  | 8200  | 300   | 2  | 4.06E-10 | 5   | 1.667 | LOC106908306         |                      |
| DMRNW_015097309.1:31001 | NW_015097309.1 | 31001 | 31600 | 600   | 3  | 2.12E-09 | 8   | 1.333 |                      |                      |
| DMRNW_015097309.1:34901 | NW_015097309.1 | 34901 | 38800 | 3900  | 8  | 5.33E-15 | 140 | 3.59  |                      |                      |
| DMRNW_015097309.1:44901 | NW_015097309.1 | 44901 | 49100 | 4200  | 1  | 3.00E-09 | 105 | 2.5   | LOC106908309         |                      |
| DMRNW_015097309.1:54201 | NW_015097309.1 | 54201 | 57300 | 3100  | 5  | 3.92E-13 | 50  | 1.613 |                      |                      |
| DMRNW_015097309.1:66201 | NW_015097309.1 | 66201 | 68700 | 2500  | 3  | 3.69E-16 | 168 | 6.72  |                      |                      |
| DMRNW_015097316.1:801   | NW_015097316.1 | 801   | 5100  | 4300  | 4  | 5.07E-17 | 93  | 2.163 |                      |                      |
| DMRNW_015097320.1:55801 | NW_015097320.1 | 55801 | 61100 | 5300  | 2  | 5.68E-09 | 247 | 4.66  |                      |                      |
| DMRNW_015097321.1:2301  | NW_015097321.1 | 2301  | 3600  | 1300  | 1  | 1.23E-08 | 17  | 1.308 | kcnk5                | Transport            |
| DMRNW_015097323.1:61101 | NW_015097323.1 | 61101 | 65300 | 4200  | 1  | 7.95E-08 | 74  | 1.762 | LOC106908371         |                      |
| DMRNW_015097325.1:17201 | NW_015097325.1 | 17201 | 17900 | 700   | 3  | 7.34E-12 | 28  | 4     |                      |                      |
| DMRNW_015097335.1:301   | NW_015097335.1 | 301   | 4200  | 3900  | 3  | 9.87E-09 | 72  | 1.846 | LOC106908402         |                      |
| DMRNW_015097335.1:24801 | NW_015097335.1 | 24801 | 27300 | 2500  | 1  | 9.95E-08 | 60  | 2.4   |                      |                      |
| DMRNW_015097335.1:65801 | NW_015097335.1 | 65801 | 66300 | 500   | 1  | 1.38E-11 | 0   | 0     | LOC106908404         |                      |
| DMRNW_015097336.1:17501 | NW_015097336.1 | 17501 | 18200 | 700   | 2  | 9.04E-16 | 18  | 2.571 | LOC106908409         |                      |
| DMRNW_015097336.1:23501 | NW_015097336.1 | 23501 | 24200 | 700   | 1  | 8.68E-15 | 10  | 1.429 | LOC106908409         |                      |
| DMRNW_015097340.1:31801 | NW_015097340.1 | 31801 | 32200 | 400   | 3  | 5.90E-13 | 17  | 4.25  | LOC106908428         |                      |
| DMRNW_015097343.1:68301 | NW_015097343.1 | 68301 | 68449 | 149   | 2  | 7.24E-15 | 3   | 2.013 |                      |                      |
| DMRNW_015097345.1:30301 | NW_015097345.1 | 30301 | 30900 | 600   | 1  | 8.12E-08 | 8   | 1.333 |                      |                      |
| DMRNW_015097353.1:26801 | NW_015097353.1 | 26801 | 27400 | 600   | 1  | 5.83E-34 | 21  | 3.5   | LOC106908470         |                      |
| DMRNW_015097353.1:49701 | NW_015097353.1 | 49701 | 52000 | 2300  | 1  | 2.62E-12 | 163 | 7.087 | adam9                | Protease             |
| DMRNW_015097353.1:56301 | NW_015097353.1 | 56301 | 60600 | 4300  | 1  | 9.37E-09 | 247 | 5.744 | adam9                | Protease             |
| DMRNW_015097356.1:1201  | NW_015097356.1 | 1201  | 3800  | 2600  | 10 | 5.26E-22 | 115 | 4.423 |                      |                      |
| DMRNW_015097356.1:9701  | NW_015097356.1 | 9701  | 10400 | 700   | 4  | 1.61E-13 | 22  | 3.143 |                      |                      |
| DMRNW_015097360.1:43501 | NW_015097360.1 | 43501 | 44800 | 1300  | 1  | 4.70E-09 | 33  | 2.538 | LOC106908494         |                      |
| DMRNW_015097365.1:21401 | NW_015097365.1 | 21401 | 25800 | 4400  | 3  | 2.01E-12 | 131 | 2.977 |                      |                      |
| DMRNW_015097383.1:43301 | NW_015097383.1 | 43301 | 44500 | 1200  | 1  | 8.78E-12 | 27  | 2.25  |                      |                      |
| DMRNW_015097395.1:13701 | NW_015097395.1 | 13701 | 14200 | 500   | 4  | 5.07E-29 | 12  | 2.4   | LOC106908599         |                      |
| DMRNW_015097395.1:38201 | NW_015097395.1 | 38201 | 38400 | 200   | 2  | 5.47E-12 | 3   | 1.5   | LOC106908600         |                      |
| DMRNW_015097403.1:62301 | NW_015097403.1 | 62301 | 63500 | 1200  | 1  | 2.76E-09 | 8   | 0.667 |                      |                      |
| DMRNW_015097418.1:49501 | NW_015097418.1 | 49501 | 52200 | 2700  | 3  | 7.59E-12 | 79  | 2.926 | LOC106908689         |                      |
| DMRNW_015097420.1:23601 | NW_015097420.1 | 23601 | 28300 | 4700  | 9  | 2.29E-13 | 201 | 4.277 |                      |                      |
| DMRNW_015097425.1:50901 | NW_015097425.1 | 50901 | 52400 | 1500  | 1  | 4.72E-09 | 41  | 2.733 |                      |                      |
| DMRNW_015097428.1:29501 | NW_015097428.1 | 29501 | 31200 | 1700  | 1  | 8.04E-08 | 23  | 1.353 |                      |                      |
| DMRNW_015097433.1:6301  | NW_015097433.1 | 6301  | 7000  | 700   | 4  | 1.05E-18 | 28  | 4     |                      |                      |
| DMRNW_015097433.1:11801 | NW_015097433.1 | 11801 | 13200 | 1400  | 2  | 1.62E-11 | 18  | 1.286 |                      |                      |
| DMRNW_015097437.1:50401 | NW_015097437.1 | 50401 | 50700 | 300   | 1  | 4.92E-08 | 29  | 9.667 | LOC106908744         |                      |
| DMRNW_015097438.1:1     | NW_015097438.1 | 1     | 1000  | 1000  | 2  | 3.47E-23 | 12  | 1.2   |                      |                      |
| DMRNW_015097442.1:26701 | NW_015097442.1 | 26701 | 27000 | 300   | 3  | 1.68E-21 | 18  | 6     | LOC106908768         |                      |
| DMRNW_015097447.1:29201 | NW_015097447.1 | 29201 | 31000 | 1800  | 2  | 3.11E-22 | 31  | 1.722 | LOC106908777         |                      |
| DMRNW_015097449.1:42401 | NW_015097449.1 | 42401 | 43400 | 1000  | 3  | 8.53E-26 | 31  | 3.1   | katnb1               | Unknown              |
| DMRNW_015097449.1:46601 | NW_015097449.1 | 46601 | 47500 | 900   | 9  | 8.52E-27 | 6   | 0.667 | katnb1               | Unknown              |
| DMRNW_015097449.1:58501 | NW_015097449.1 | 58501 | 61700 | 3200  | 1  | 4.66E-12 | 127 | 3.969 | katnb1;kifc3         | Unknown;Cytoskeleton |
| DMRNW_015097457.1:60201 | NW_015097457.1 | 60201 | 62500 | 2300  | 3  | 5.38E-09 | 27  | 1.174 |                      |                      |
| DMRNW_015097470.1:501   | NW_015097470.1 | 501   | 7800  | 7300  | 1  | 6.90E-08 | 64  | 0.877 |                      |                      |
| DMRNW_015097470.1:21101 | NW_015097470.1 | 21101 | 25100 | 4000  | 2  | 4.20E-08 | 19  | 0.475 |                      |                      |
| DMRNW_015097470.1:42901 | NW_015097470.1 | 42901 | 47100 | 4200  | 2  | 2.14E-11 | 30  | 0.714 | LOC106908850         |                      |
| DMRNW_015097480.1:22301 | NW_015097480.1 | 22301 | 23500 | 1200  | 1  | 3.50E-10 | 76  | 6.333 |                      |                      |
| DMRNW_015097482.1:42101 | NW_015097482.1 | 42101 | 42400 | 300   | 2  | 3.44E-15 | 3   | 1     |                      |                      |
| DMRNW_015097485.1:38301 | NW_015097485.1 | 38301 | 38900 | 600   | 2  | 6.38E-13 | 7   | 1.167 |                      |                      |
| DMRNW_015097488.1:33701 | NW_015097488.1 | 33701 | 50500 | 16800 | 7  | 6.77E-10 | 453 | 2.696 |                      |                      |
| DMRNW_015097530.1:24801 | NW_015097530.1 | 24801 | 26900 | 2100  | 1  | 6.40E-10 | 88  | 4.19  | LOC106909028         |                      |
| DMRNW_015097534.1:20601 | NW_015097534.1 | 20601 | 21400 | 800   | 2  | 1.61E-19 | 12  | 1.5   | LOC106909045         |                      |
| DMRNW_015097537.1:43001 | NW_015097537.1 | 43001 | 43600 | 600   | 1  | 2.24E-10 | 11  | 1.833 |                      |                      |
| DMRNW_015097551.1:41301 | NW_015097551.1 | 41301 | 43600 | 2300  | 2  | 1.83E-11 | 30  | 1.304 | LOC106909086         |                      |
| DMRNW_015097558.1:4801  | NW_015097558.1 | 4801  | 5800  | 1000  | 1  | 7.35E-12 | 43  | 4.3   | hsd12                | Metabolism           |
| DMRNW_015097559.1:4101  | NW_015097559.1 | 4101  | 7100  | 3000  | 1  | 7.42E-11 | 16  | 0.533 |                      |                      |
| DMRNW_015097569.1:78301 | NW_015097569.1 | 78301 | 78700 | 400   | 1  | 4.44E-12 | 12  | 3     | LOC106909149         |                      |
| DMRNW_015097578.1:47801 | NW_015097578.1 | 47801 | 49500 | 1700  | 1  | 1.53E-08 | 30  | 1.765 |                      |                      |
| DMRNW_015097583.1:47101 | NW_015097583.1 | 47101 | 48000 | 900   | 1  | 9.70E-09 | 29  | 3.222 |                      |                      |
| DMRNW_015097589.1:4301  | NW_015097589.1 | 4301  | 7500  | 3200  | 2  | 3.14E-11 | 189 | 5.906 | spata2l;LOC106909220 | Development          |
| DMRNW_015097603.1:23901 | NW_015097603.1 | 23901 | 25200 | 1300  | 1  | 5.24E-08 | 35  | 2.692 |                      |                      |
| DMRNW_015097615.1:18501 | NW_015097615.1 | 18501 | 19800 | 1300  | 1  | 3.27E-09 | 32  | 2.462 |                      |                      |
| DMRNW_015097616.1:53901 | NW_015097616.1 | 53901 | 56400 | 2500  | 6  | 4.29E-21 | 74  | 2.96  |                      |                      |
| DMRNW_015097617.1:43901 | NW_015097617.1 | 43901 | 44600 | 700   | 2  | 6.34E-24 | 7   | 1     |                      |                      |

|                         |                |       |       |       |   |          |     |       |                           |               |
|-------------------------|----------------|-------|-------|-------|---|----------|-----|-------|---------------------------|---------------|
| DMRNW_015097617.1:66601 | NW_015097617.1 | 66601 | 68800 | 2200  | 1 | 2.20E-08 | 35  | 1.591 |                           |               |
| DMRNW_015097634.1:17601 | NW_015097634.1 | 17601 | 18000 | 400   | 1 | 4.89E-10 | 7   | 1.75  | LOC106909343              |               |
| DMRNW_015097636.1:37601 | NW_015097636.1 | 37601 | 43700 | 6100  | 3 | 2.32E-13 | 186 | 3.049 |                           |               |
| DMRNW_015097668.1:14401 | NW_015097668.1 | 14401 | 18400 | 4000  | 2 | 4.49E-10 | 93  | 2.325 |                           |               |
| DMRNW_015097693.1:50601 | NW_015097693.1 | 50601 | 51900 | 1300  | 5 | 7.56E-22 | 15  | 1.154 | LOC106909504              |               |
| DMRNW_015097694.1:36201 | NW_015097694.1 | 36201 | 36700 | 500   | 1 | 9.72E-09 | 24  | 4.8   |                           |               |
| DMRNW_015097703.1:15601 | NW_015097703.1 | 15601 | 16500 | 900   | 1 | 6.30E-12 | 18  | 2     | LOC106909526              |               |
| DMRNW_015097711.1:41601 | NW_015097711.1 | 41601 | 42200 | 600   | 1 | 1.33E-08 | 25  | 4.167 |                           |               |
| DMRNW_015097725.1:36201 | NW_015097725.1 | 36201 | 36900 | 700   | 2 | 6.91E-09 | 1   | 0.143 | LOC106909585              |               |
| DMRNW_015097726.1:43801 | NW_015097726.1 | 43801 | 45100 | 1300  | 2 | 3.88E-17 | 12  | 0.923 |                           |               |
| DMRNW_015097726.1:53101 | NW_015097726.1 | 53101 | 53600 | 500   | 1 | 2.45E-08 | 8   | 1.6   |                           |               |
| DMRNW_015097730.1:35301 | NW_015097730.1 | 35301 | 41000 | 5700  | 3 | 3.22E-14 | 223 | 3.912 | LOC106909601              |               |
| DMRNW_015097735.1:48601 | NW_015097735.1 | 48601 | 50000 | 1400  | 2 | 1.03E-13 | 31  | 2.214 | LOC106909622              |               |
| DMRNW_015097739.1:23501 | NW_015097739.1 | 23501 | 23900 | 400   | 1 | 3.26E-09 | 15  | 3.75  | LOC106909635              |               |
| DMRNW_015097743.1:18301 | NW_015097743.1 | 18301 | 18500 | 200   | 1 | 3.76E-12 | 11  | 5.5   | gramd1a                   | Unknown       |
| DMRNW_015097744.1:50101 | NW_015097744.1 | 50101 | 50600 | 500   | 1 | 6.78E-09 | 31  | 6.2   | LOC106909654              |               |
| DMRNW_015097748.1:51901 | NW_015097748.1 | 51901 | 52500 | 600   | 1 | 8.82E-10 | 10  | 1.667 |                           |               |
| DMRNW_015097764.1:1     | NW_015097764.1 | 1     | 600   | 600   | 1 | 7.75E-10 | 32  | 5.333 |                           |               |
| DMRNW_015097774.1:30501 | NW_015097774.1 | 30501 | 32400 | 1900  | 2 | 7.10E-13 | 9   | 0.474 | LOC106909707              |               |
| DMRNW_015097792.1:201   | NW_015097792.1 | 201   | 6700  | 6500  | 1 | 9.88E-08 | 137 | 2.108 |                           |               |
| DMRNW_015097792.1:26201 | NW_015097792.1 | 26201 | 42000 | 15800 | 1 | 1.63E-08 | 396 | 2.506 | LOC106909744              |               |
| DMRNW_015097806.1:10301 | NW_015097806.1 | 10301 | 10600 | 300   | 1 | 7.01E-08 | 3   | 1     | LOC106909775              |               |
| DMRNW_015097814.1:36101 | NW_015097814.1 | 36101 | 37300 | 1200  | 2 | 2.46E-10 | 30  | 2.5   |                           |               |
| DMRNW_015097815.1:28401 | NW_015097815.1 | 28401 | 28700 | 300   | 1 | 2.22E-09 | 27  | 9     | LOC106909806              |               |
| DMRNW_015097824.1:12101 | NW_015097824.1 | 12101 | 13500 | 1400  | 2 | 8.68E-10 | 13  | 0.929 |                           |               |
| DMRNW_015097831.1:6601  | NW_015097831.1 | 6601  | 7100  | 500   | 1 | 2.33E-09 | 7   | 1.4   |                           |               |
| DMRNW_015097834.1:1     | NW_015097834.1 | 1     | 200   | 200   | 2 | 5.79E-13 | 0   | 0     |                           |               |
| DMRNW_015097836.1:21401 | NW_015097836.1 | 21401 | 21800 | 400   | 1 | 5.49E-08 | 5   | 1.25  | LOC106909852              |               |
| DMRNW_015097877.1:41201 | NW_015097877.1 | 41201 | 42300 | 1100  | 1 | 7.40E-08 | 32  | 2.909 | cebpa                     | Transcription |
| DMRNW_015097894.1:20401 | NW_015097894.1 | 20401 | 24800 | 4400  | 1 | 3.67E-08 | 144 | 3.273 |                           |               |
| DMRNW_015097898.1:6801  | NW_015097898.1 | 6801  | 7400  | 600   | 1 | 7.09E-09 | 25  | 4.167 |                           |               |
| DMRNW_015097899.1:7201  | NW_015097899.1 | 7201  | 7500  | 300   | 2 | 1.75E-12 | 12  | 4     |                           |               |
| DMRNW_015097905.1:44001 | NW_015097905.1 | 44001 | 44700 | 700   | 1 | 1.61E-08 | 6   | 0.857 |                           |               |
| DMRNW_015097911.1:23801 | NW_015097911.1 | 23801 | 24800 | 1000  | 1 | 1.38E-08 | 44  | 4.4   | LOC106910013;LOC106910011 |               |
| DMRNW_015097917.1:32501 | NW_015097917.1 | 32501 | 32900 | 400   | 1 | 5.07E-10 | 11  | 2.75  |                           |               |
| DMRNW_015097917.1:39501 | NW_015097917.1 | 39501 | 39900 | 400   | 2 | 2.41E-08 | 3   | 0.75  |                           |               |
| DMRNW_015097917.1:41801 | NW_015097917.1 | 41801 | 42400 | 600   | 1 | 3.00E-28 | 27  | 4.5   |                           |               |
| DMRNW_015097922.1:29701 | NW_015097922.1 | 29701 | 31500 | 1800  | 3 | 6.00E-14 | 49  | 2.722 |                           |               |
| DMRNW_015097926.1:44901 | NW_015097926.1 | 44901 | 46200 | 1300  | 1 | 1.82E-11 | 46  | 3.538 |                           |               |
| DMRNW_015097941.1:8201  | NW_015097941.1 | 8201  | 13300 | 5100  | 3 | 4.47E-17 | 56  | 1.098 |                           |               |
| DMRNW_015097942.1:39601 | NW_015097942.1 | 39601 | 40000 | 400   | 2 | 2.65E-13 | 8   | 2     |                           |               |
| DMRNW_015097942.1:45801 | NW_015097942.1 | 45801 | 46100 | 300   | 1 | 4.82E-08 | 2   | 0.667 |                           |               |
| DMRNW_015097946.1:11501 | NW_015097946.1 | 11501 | 16500 | 5000  | 1 | 3.61E-12 | 171 | 3.42  |                           |               |
| DMRNW_015097947.1:5201  | NW_015097947.1 | 5201  | 5700  | 500   | 1 | 1.62E-15 | 1   | 0.2   |                           |               |
| DMRNW_015097951.1:1     | NW_015097951.1 | 1     | 700   | 700   | 1 | 7.34E-08 | 9   | 1.286 | LOC106910109              |               |
| DMRNW_015097957.1:401   | NW_015097957.1 | 401   | 1400  | 1000  | 2 | 4.27E-23 | 35  | 3.5   | gpatch1                   |               |
| DMRNW_015097957.1:40901 | NW_015097957.1 | 40901 | 41000 | 100   | 1 | 2.01E-10 | 3   | 3     | wdr59                     |               |
| DMRNW_015097969.1:43701 | NW_015097969.1 | 43701 | 45000 | 1300  | 1 | 2.80E-10 | 42  | 3.231 |                           |               |
| DMRNW_015097971.1:63801 | NW_015097971.1 | 63801 | 66000 | 2200  | 3 | 2.63E-11 | 62  | 2.818 | trnae-cuc;trnae-uuc       |               |
| DMRNW_015097981.1:35401 | NW_015097981.1 | 35401 | 35700 | 300   | 2 | 1.02E-11 | 11  | 3.667 |                           |               |
| DMRNW_015097988.1:17301 | NW_015097988.1 | 17301 | 18400 | 1100  | 2 | 1.59E-09 | 27  | 2.455 | LOC106910202              |               |
| DMRNW_015097990.1:10501 | NW_015097990.1 | 10501 | 14200 | 3700  | 1 | 6.91E-12 | 73  | 1.973 | LOC106910210              |               |
| DMRNW_015097990.1:20301 | NW_015097990.1 | 20301 | 23200 | 2900  | 2 | 3.95E-10 | 59  | 2.034 |                           |               |
| DMRNW_015098017.1:43001 | NW_015098017.1 | 43001 | 43700 | 700   | 1 | 7.59E-08 | 3   | 0.429 |                           |               |
| DMRNW_015098022.1:25301 | NW_015098022.1 | 25301 | 29000 | 3700  | 1 | 2.28E-08 | 76  | 2.054 | LOC106910279              |               |
| DMRNW_015098038.1:27401 | NW_015098038.1 | 27401 | 27700 | 300   | 3 | 4.40E-16 | 5   | 1.667 | LOC106910324              |               |
| DMRNW_015098038.1:35101 | NW_015098038.1 | 35101 | 35800 | 700   | 1 | 1.53E-09 | 3   | 0.429 | LOC106910324              |               |
| DMRNW_015098041.1:12701 | NW_015098041.1 | 12701 | 15500 | 2800  | 1 | 1.62E-08 | 53  | 1.893 | rbm42                     | Transcription |
| DMRNW_015098041.1:37601 | NW_015098041.1 | 37601 | 40500 | 2900  | 3 | 2.99E-09 | 55  | 1.897 | LOC106910333              |               |
| DMRNW_015098041.1:45901 | NW_015098041.1 | 45901 | 47200 | 1300  | 1 | 1.22E-09 | 19  | 1.462 |                           |               |
| DMRNW_015098056.1:301   | NW_015098056.1 | 301   | 500   | 200   | 1 | 4.17E-08 | 3   | 1.5   |                           |               |
| DMRNW_015098063.1:3101  | NW_015098063.1 | 3101  | 10200 | 7100  | 3 | 7.72E-12 | 134 | 1.887 |                           |               |
| DMRNW_015098069.1:19401 | NW_015098069.1 | 19401 | 20700 | 1300  | 2 | 1.50E-11 | 58  | 4.462 |                           |               |
| DMRNW_015098069.1:34701 | NW_015098069.1 | 34701 | 35900 | 1200  | 1 | 5.56E-18 | 56  | 4.667 | il7r                      |               |
| DMRNW_015098081.1:29601 | NW_015098081.1 | 29601 | 32600 | 3000  | 2 | 7.36E-14 | 46  | 1.533 |                           |               |
| DMRNW_015098089.1:1     | NW_015098089.1 | 1     | 400   | 400   | 1 | 1.56E-15 | 9   | 2.25  |                           |               |
| DMRNW_015098098.1:9201  | NW_015098098.1 | 9201  | 14200 | 5000  | 4 | 2.46E-10 | 118 | 2.36  | LOC106910464;LOC106910463 |               |
| DMRNW_015098098.1:33001 | NW_015098098.1 | 33001 | 34500 | 1500  | 3 | 4.42E-31 | 41  | 2.733 |                           |               |
| DMRNW_015098107.1:20901 | NW_015098107.1 | 20901 | 21200 | 300   | 1 | 1.34E-08 | 11  | 3.667 | lrrc2                     | Unknown       |
| DMRNW_015098112.1:26001 | NW_015098112.1 | 26001 | 30200 | 4200  | 2 | 5.02E-10 | 312 | 7.429 | LOC106910487              |               |
| DMRNW_015098114.1:36101 | NW_015098114.1 | 36101 | 40800 | 4700  | 2 | 1.51E-14 | 235 | 5     | lmbd2;LOC106910490        |               |

|                         |                |       |       |      |    |          |     |       |                                        |            |
|-------------------------|----------------|-------|-------|------|----|----------|-----|-------|----------------------------------------|------------|
| DMRNW_015098114.1:52701 | NW_015098114.1 | 52701 | 55700 | 3000 | 2  | 1.74E-10 | 67  | 2.233 |                                        |            |
| DMRNW_015098123.1:30301 | NW_015098123.1 | 30301 | 30500 | 200  | 1  | 3.01E-09 | 4   | 2     | LOC106910508                           |            |
| DMRNW_015098150.1:24901 | NW_015098150.1 | 24901 | 26100 | 1200 | 2  | 1.04E-09 | 12  | 1     |                                        |            |
| DMRNW_015098153.1:20801 | NW_015098153.1 | 20801 | 21900 | 1100 | 3  | 1.48E-10 | 39  | 3.545 | LOC106910579                           |            |
| DMRNW_015098175.1:11701 | NW_015098175.1 | 11701 | 12000 | 300  | 1  | 4.57E-09 | 3   | 1     |                                        |            |
| DMRNW_015098177.1:17901 | NW_015098177.1 | 17901 | 18900 | 1000 | 2  | 9.78E-13 | 28  | 2.8   |                                        |            |
| DMRNW_015098177.1:32801 | NW_015098177.1 | 32801 | 33800 | 1000 | 1  | 6.47E-12 | 17  | 1.7   |                                        |            |
| DMRNW_015098180.1:39701 | NW_015098180.1 | 39701 | 40122 | 422  | 2  | 4.07E-10 | 10  | 2.37  | LOC106910638                           |            |
| DMRNW_015098203.1:24301 | NW_015098203.1 | 24301 | 25400 | 1100 | 1  | 3.10E-08 | 11  | 1     | LOC106910711                           |            |
| DMRNW_015098206.1:12101 | NW_015098206.1 | 12101 | 16300 | 4200 | 1  | 1.95E-11 | 77  | 1.833 |                                        |            |
| DMRNW_015098213.1:43501 | NW_015098213.1 | 43501 | 48600 | 5100 | 6  | 1.28E-17 | 243 | 4.765 | LOC106910732;LOC106910731              |            |
| DMRNW_015098217.1:9901  | NW_015098217.1 | 9901  | 13400 | 3500 | 1  | 4.65E-08 | 56  | 1.6   | LOC106910738                           |            |
| DMRNW_015098217.1:18501 | NW_015098217.1 | 18501 | 23300 | 4800 | 9  | 2.09E-23 | 72  | 1.5   | LOC106910738                           |            |
| DMRNW_015098217.1:27201 | NW_015098217.1 | 27201 | 28000 | 800  | 4  | 1.33E-15 | 7   | 0.875 | LOC106910738                           |            |
| DMRNW_015098240.1:17501 | NW_015098240.1 | 17501 | 24300 | 6800 | 2  | 2.05E-10 | 167 | 2.456 | ms4a4a;LOC106910791                    |            |
| DMRNW_015098240.1:52201 | NW_015098240.1 | 52201 | 56100 | 3900 | 1  | 1.78E-13 | 95  | 2.436 | LOC106910784                           |            |
| DMRNW_015098251.1:5001  | NW_015098251.1 | 5001  | 9900  | 4900 | 1  | 1.09E-11 | 138 | 2.816 | LOC106910809;LOC106910810;LOC106910812 |            |
| DMRNW_015098257.1:501   | NW_015098257.1 | 501   | 1700  | 1200 | 1  | 2.53E-08 | 28  | 2.333 |                                        |            |
| DMRNW_015098269.1:21001 | NW_015098269.1 | 21001 | 23600 | 2600 | 2  | 1.30E-08 | 67  | 2.577 |                                        |            |
| DMRNW_015098269.1:29801 | NW_015098269.1 | 29801 | 31100 | 1300 | 1  | 1.46E-13 | 52  | 4     |                                        |            |
| DMRNW_015098273.1:12901 | NW_015098273.1 | 12901 | 16900 | 4000 | 1  | 7.85E-08 | 220 | 5.5   | LOC106910866                           |            |
| DMRNW_015098277.1:46301 | NW_015098277.1 | 46301 | 47800 | 1500 | 1  | 4.42E-09 | 15  | 1     |                                        |            |
| DMRNW_015098282.1:4101  | NW_015098282.1 | 4101  | 4500  | 400  | 1  | 5.00E-11 | 5   | 1.25  |                                        |            |
| DMRNW_015098291.1:2201  | NW_015098291.1 | 2201  | 4000  | 1800 | 1  | 4.40E-08 | 65  | 3.611 |                                        |            |
| DMRNW_015098291.1:13301 | NW_015098291.1 | 13301 | 15300 | 2000 | 1  | 1.98E-10 | 94  | 4.7   |                                        |            |
| DMRNW_015098321.1:7301  | NW_015098321.1 | 7301  | 7600  | 300  | 1  | 6.13E-09 | 10  | 3.333 |                                        |            |
| DMRNW_015098336.1:9401  | NW_015098336.1 | 9401  | 11100 | 1700 | 5  | 3.22E-10 | 45  | 2.647 | LOC106910989                           |            |
| DMRNW_015098336.1:14201 | NW_015098336.1 | 14201 | 15200 | 1000 | 2  | 2.20E-09 | 19  | 1.9   |                                        |            |
| DMRNW_015098349.1:27001 | NW_015098349.1 | 27001 | 27300 | 300  | 3  | 9.77E-36 | 9   | 3     | LOC106911003                           |            |
| DMRNW_015098352.1:3001  | NW_015098352.1 | 3001  | 3300  | 300  | 2  | 5.91E-10 | 4   | 1.333 |                                        |            |
| DMRNW_015098364.1:11801 | NW_015098364.1 | 11801 | 13200 | 1400 | 2  | 4.04E-10 | 31  | 2.214 |                                        |            |
| DMRNW_015098373.1:22501 | NW_015098373.1 | 22501 | 24500 | 2000 | 1  | 4.25E-12 | 26  | 1.3   | LOC106911039                           |            |
| DMRNW_015098373.1:28301 | NW_015098373.1 | 28301 | 29800 | 1500 | 1  | 1.08E-10 | 48  | 3.2   | LOC106911039                           |            |
| DMRNW_015098395.1:32201 | NW_015098395.1 | 32201 | 34300 | 2100 | 2  | 4.12E-13 | 62  | 2.952 | LOC106911071                           |            |
| DMRNW_015098410.1:1     | NW_015098410.1 | 1     | 400   | 400  | 1  | 6.05E-08 | 25  | 6.25  |                                        |            |
| DMRNW_015098418.1:2001  | NW_015098418.1 | 2001  | 4000  | 2000 | 1  | 5.08E-09 | 74  | 3.7   | LOC106911107                           |            |
| DMRNW_015098421.1:30701 | NW_015098421.1 | 30701 | 33800 | 3100 | 9  | 9.08E-21 | 50  | 1.613 |                                        |            |
| DMRNW_015098422.1:24001 | NW_015098422.1 | 24001 | 25900 | 1900 | 3  | 6.58E-12 | 66  | 3.474 | LOC106911115                           |            |
| DMRNW_015098428.1:21301 | NW_015098428.1 | 21301 | 23500 | 2200 | 1  | 2.18E-08 | 35  | 1.591 | LOC106911130                           |            |
| DMRNW_015098428.1:24501 | NW_015098428.1 | 24501 | 27300 | 2800 | 1  | 5.51E-08 | 79  | 2.821 | LOC106911130;LOC106911131              |            |
| DMRNW_015098428.1:33001 | NW_015098428.1 | 33001 | 35100 | 2100 | 1  | 3.58E-08 | 46  | 2.19  |                                        |            |
| DMRNW_015098446.1:9701  | NW_015098446.1 | 9701  | 10800 | 1100 | 1  | 1.16E-08 | 10  | 0.909 | LOC106911165                           |            |
| DMRNW_015098493.1:12001 | NW_015098493.1 | 12001 | 17900 | 5900 | 36 | 1.28E-29 | 271 | 4.593 |                                        |            |
| DMRNW_015098497.1:7401  | NW_015098497.1 | 7401  | 7800  | 400  | 1  | 6.70E-08 | 8   | 2     | LOC106911252                           |            |
| DMRNW_015098506.1:22301 | NW_015098506.1 | 22301 | 23200 | 900  | 1  | 6.15E-08 | 20  | 2.222 | LOC106911262                           |            |
| DMRNW_015098509.1:6901  | NW_015098509.1 | 6901  | 8900  | 2000 | 2  | 6.63E-08 | 52  | 2.6   |                                        |            |
| DMRNW_015098509.1:17001 | NW_015098509.1 | 17001 | 17500 | 500  | 2  | 1.51E-08 | 17  | 3.4   |                                        |            |
| DMRNW_015098547.1:7101  | NW_015098547.1 | 7101  | 9200  | 2100 | 2  | 3.18E-09 | 38  | 1.81  | b4galt4                                | Metabolism |
| DMRNW_015098547.1:28601 | NW_015098547.1 | 28601 | 30800 | 2200 | 1  | 2.12E-09 | 51  | 2.318 |                                        |            |
| DMRNW_015098566.1:6901  | NW_015098566.1 | 6901  | 7900  | 1000 | 1  | 1.33E-08 | 19  | 1.9   |                                        |            |
| DMRNW_015098567.1:13101 | NW_015098567.1 | 13101 | 15100 | 2000 | 1  | 1.56E-08 | 50  | 2.5   |                                        |            |
| DMRNW_015098586.1:28801 | NW_015098586.1 | 28801 | 30400 | 1600 | 2  | 5.86E-14 | 28  | 1.75  |                                        |            |
| DMRNW_015098615.1:7101  | NW_015098615.1 | 7101  | 8100  | 1000 | 1  | 2.61E-08 | 14  | 1.4   |                                        |            |
| DMRNW_015098625.1:19901 | NW_015098625.1 | 19901 | 20100 | 200  | 1  | 3.08E-08 | 2   | 1     |                                        |            |
| DMRNW_015098640.1:21301 | NW_015098640.1 | 21301 | 24600 | 3300 | 3  | 4.84E-10 | 92  | 2.788 |                                        |            |
| DMRNW_015098650.1:1     | NW_015098650.1 | 1     | 1300  | 1300 | 1  | 1.77E-09 | 29  | 2.231 | LOC106911507                           |            |
| DMRNW_015098650.1:27401 | NW_015098650.1 | 27401 | 28600 | 1200 | 2  | 5.75E-11 | 17  | 1.417 | LOC106911510                           |            |
| DMRNW_015098651.1:12001 | NW_015098651.1 | 12001 | 12400 | 400  | 2  | 4.27E-09 | 9   | 2.25  | LOC106911512                           |            |
| DMRNW_015098653.1:26201 | NW_015098653.1 | 26201 | 26900 | 700  | 2  | 1.44E-11 | 25  | 3.571 |                                        |            |
| DMRNW_015098655.1:401   | NW_015098655.1 | 401   | 1900  | 1500 | 6  | 5.18E-11 | 23  | 1.533 | LOC106911515                           |            |
| DMRNW_015098655.1:14301 | NW_015098655.1 | 14301 | 15900 | 1600 | 3  | 1.32E-17 | 31  | 1.938 |                                        |            |
| DMRNW_015098655.1:21501 | NW_015098655.1 | 21501 | 23500 | 2000 | 3  | 2.97E-20 | 14  | 0.7   |                                        |            |
| DMRNW_015098658.1:14901 | NW_015098658.1 | 14901 | 16500 | 1600 | 2  | 2.57E-14 | 23  | 1.438 | LOC106911525                           |            |
| DMRNW_015098668.1:16301 | NW_015098668.1 | 16301 | 19900 | 3600 | 2  | 5.01E-13 | 128 | 3.556 | LOC106911537                           |            |
| DMRNW_015098671.1:22201 | NW_015098671.1 | 22201 | 28100 | 5900 | 1  | 8.67E-11 | 123 | 2.085 |                                        |            |
| DMRNW_015098684.1:6601  | NW_015098684.1 | 6601  | 12400 | 5800 | 2  | 2.90E-08 | 110 | 1.897 |                                        |            |
| DMRNW_015098700.1:21501 | NW_015098700.1 | 21501 | 22000 | 500  | 2  | 2.22E-21 | 1   | 0.2   |                                        |            |
| DMRNW_015098707.1:23901 | NW_015098707.1 | 23901 | 25700 | 1800 | 1  | 4.06E-10 | 43  | 2.389 |                                        |            |
| DMRNW_015098764.1:18601 | NW_015098764.1 | 18601 | 21000 | 2400 | 6  | 5.65E-20 | 125 | 5.208 | LOC106911668                           |            |
| DMRNW_015098771.1:4601  | NW_015098771.1 | 4601  | 4800  | 200  | 1  | 5.56E-09 | 1   | 0.5   |                                        |            |
| DMRNW_015098775.1:701   | NW_015098775.1 | 701   | 1000  | 300  | 1  | 4.33E-11 | 10  | 3.333 |                                        |            |



|                         |                |       |       |       |    |          |     |       |                           |           |
|-------------------------|----------------|-------|-------|-------|----|----------|-----|-------|---------------------------|-----------|
| DMRNW_015098779.1:22001 | NW_015098779.1 | 22001 | 26400 | 4400  | 22 | 3.69E-26 | 279 | 6.341 |                           |           |
| DMRNW_015098806.1:45501 | NW_015098806.1 | 45501 | 47000 | 1500  | 1  | 2.44E-15 | 70  | 4.667 |                           |           |
| DMRNW_015098821.1:26201 | NW_015098821.1 | 26201 | 26400 | 200   | 1  | 1.79E-09 | 7   | 3.5   |                           |           |
| DMRNW_015098823.1:5201  | NW_015098823.1 | 5201  | 8600  | 3400  | 1  | 1.24E-08 | 68  | 2     | LOC106911747              |           |
| DMRNW_015098835.1:18101 | NW_015098835.1 | 18101 | 18500 | 400   | 1  | 2.12E-08 | 13  | 3.25  |                           |           |
| DMRNW_015098839.1:4401  | NW_015098839.1 | 4401  | 11800 | 7400  | 17 | 4.11E-27 | 232 | 3.135 | LOC106911767              |           |
| DMRNW_015098839.1:16501 | NW_015098839.1 | 16501 | 18900 | 2400  | 3  | 3.54E-10 | 93  | 3.875 |                           |           |
| DMRNW_015098839.1:24701 | NW_015098839.1 | 24701 | 25800 | 1100  | 2  | 1.24E-09 | 25  | 2.273 |                           |           |
| DMRNW_015098840.1:18001 | NW_015098840.1 | 18001 | 20500 | 2500  | 2  | 5.28E-46 | 61  | 2.44  | plcg2                     | Signaling |
| DMRNW_015098854.1:6101  | NW_015098854.1 | 6101  | 8300  | 2200  | 2  | 4.25E-09 | 24  | 1.091 |                           |           |
| DMRNW_015098854.1:18001 | NW_015098854.1 | 18001 | 18900 | 900   | 1  | 3.89E-10 | 21  | 2.333 |                           |           |
| DMRNW_015098859.1:101   | NW_015098859.1 | 101   | 1600  | 1500  | 1  | 9.39E-08 | 24  | 1.6   | LOC106911797              |           |
| DMRNW_015098863.1:7201  | NW_015098863.1 | 7201  | 9300  | 2100  | 1  | 1.18E-12 | 43  | 2.048 |                           |           |
| DMRNW_015098911.1:15401 | NW_015098911.1 | 15401 | 15800 | 400   | 1  | 7.38E-08 | 26  | 6.5   | LOC106911857              |           |
| DMRNW_015098924.1:14601 | NW_015098924.1 | 14601 | 17600 | 3000  | 4  | 1.56E-18 | 47  | 1.567 | LOC106911878              |           |
| DMRNW_015098941.1:17401 | NW_015098941.1 | 17401 | 21800 | 4400  | 1  | 4.12E-09 | 103 | 2.341 | LOC106911897              |           |
| DMRNW_015098942.1:9701  | NW_015098942.1 | 9701  | 11400 | 1700  | 1  | 9.57E-08 | 45  | 2.647 | LOC106911901,LOC106911899 |           |
| DMRNW_015098962.1:46801 | NW_015098962.1 | 46801 | 48200 | 1400  | 2  | 2.41E-12 | 32  | 2.286 |                           |           |
| DMRNW_015099009.1:13601 | NW_015099009.1 | 13601 | 14100 | 500   | 3  | 1.88E-21 | 22  | 4.4   | LOC106911984              |           |
| DMRNW_015099033.1:10101 | NW_015099033.1 | 10101 | 10900 | 800   | 1  | 1.22E-09 | 38  | 4.75  | LOC106912014              |           |
| DMRNW_015099033.1:24401 | NW_015099033.1 | 24401 | 25000 | 600   | 2  | 2.49E-13 | 15  | 2.5   |                           |           |
| DMRNW_015099035.1:1701  | NW_015099035.1 | 1701  | 2800  | 1100  | 1  | 2.40E-08 | 14  | 1.273 | LOC106912017              |           |
| DMRNW_015099047.1:1     | NW_015099047.1 | 1     | 1100  | 1100  | 2  | 2.42E-10 | 12  | 1.091 |                           |           |
| DMRNW_015099061.1:33901 | NW_015099061.1 | 33901 | 35400 | 1500  | 1  | 2.87E-09 | 25  | 1.667 |                           |           |
| DMRNW_015099078.1:3901  | NW_015099078.1 | 3901  | 10000 | 6100  | 11 | 8.43E-17 | 154 | 2.525 |                           |           |
| DMRNW_015099097.1:701   | NW_015099097.1 | 701   | 2700  | 2000  | 7  | 8.89E-28 | 27  | 1.35  |                           |           |
| DMRNW_015099148.1:12901 | NW_015099148.1 | 12901 | 13700 | 800   | 2  | 4.27E-15 | 17  | 2.125 |                           |           |
| DMRNW_015099168.1:10001 | NW_015099168.1 | 10001 | 11900 | 1900  | 1  | 9.13E-12 | 70  | 3.684 | LOC106912144              |           |
| DMRNW_015099193.1:8901  | NW_015099193.1 | 8901  | 10600 | 1700  | 1  | 4.48E-09 | 68  | 4     |                           |           |
| DMRNW_015099193.1:14801 | NW_015099193.1 | 14801 | 15900 | 1100  | 1  | 3.19E-09 | 40  | 3.636 |                           |           |
| DMRNW_015099194.1:17201 | NW_015099194.1 | 17201 | 18600 | 1400  | 2  | 1.93E-12 | 55  | 3.929 |                           |           |
| DMRNW_015099196.1:301   | NW_015099196.1 | 301   | 3000  | 2700  | 2  | 1.59E-11 | 35  | 1.296 | LOC106912176              |           |
| DMRNW_015099215.1:5301  | NW_015099215.1 | 5301  | 7400  | 2100  | 1  | 6.73E-10 | 86  | 4.095 | LOC106912199              |           |
| DMRNW_015099259.1:201   | NW_015099259.1 | 201   | 5000  | 4800  | 9  | 8.80E-18 | 173 | 3.604 |                           |           |
| DMRNW_015099259.1:8301  | NW_015099259.1 | 8301  | 11500 | 3200  | 12 | 6.65E-20 | 159 | 4.969 |                           |           |
| DMRNW_015099259.1:13801 | NW_015099259.1 | 13801 | 18675 | 4875  | 23 | 2.35E-48 | 233 | 4.779 | LOC106912258              |           |
| DMRNW_015099308.1:12001 | NW_015099308.1 | 12001 | 12700 | 700   | 2  | 5.73E-15 | 22  | 3.143 |                           |           |
| DMRNW_015099321.1:10601 | NW_015099321.1 | 10601 | 10700 | 100   | 1  | 1.01E-08 | 2   | 2     |                           |           |
| DMRNW_015099345.1:1001  | NW_015099345.1 | 1001  | 4400  | 3400  | 1  | 9.02E-08 | 36  | 1.059 | LOC106912358              |           |
| DMRNW_015099345.1:10501 | NW_015099345.1 | 10501 | 12200 | 1700  | 1  | 2.68E-08 | 21  | 1.235 |                           |           |
| DMRNW_015099354.1:20401 | NW_015099354.1 | 20401 | 22300 | 1900  | 4  | 1.52E-10 | 12  | 0.632 |                           |           |
| DMRNW_015099381.1:8701  | NW_015099381.1 | 8701  | 11000 | 2300  | 6  | 1.97E-36 | 117 | 5.087 | LOC106912394              |           |
| DMRNW_015099388.1:4501  | NW_015099388.1 | 4501  | 6600  | 2100  | 1  | 2.63E-13 | 23  | 1.095 |                           |           |
| DMRNW_015099419.1:12901 | NW_015099419.1 | 12901 | 14100 | 1200  | 2  | 5.85E-18 | 48  | 4     | LOC106912435              |           |
| DMRNW_015099420.1:14101 | NW_015099420.1 | 14101 | 16319 | 2219  | 1  | 5.15E-13 | 41  | 1.848 |                           |           |
| DMRNW_015099422.1:15201 | NW_015099422.1 | 15201 | 16200 | 1000  | 3  | 3.53E-10 | 4   | 0.4   |                           |           |
| DMRNW_015099445.1:1     | NW_015099445.1 | 1     | 1800  | 1800  | 17 | 3.11E-38 | 88  | 4.889 |                           |           |
| DMRNW_015099512.1:2401  | NW_015099512.1 | 2401  | 5200  | 2800  | 1  | 5.37E-09 | 86  | 3.071 |                           |           |
| DMRNW_015099538.1:7301  | NW_015099538.1 | 7301  | 9000  | 1700  | 2  | 5.25E-13 | 49  | 2.882 |                           |           |
| DMRNW_015099597.1:2101  | NW_015099597.1 | 2101  | 14500 | 12400 | 4  | 1.61E-11 | 204 | 1.645 |                           |           |
| DMRNW_015099610.1:4101  | NW_015099610.1 | 4101  | 9600  | 5500  | 1  | 1.27E-08 | 93  | 1.691 |                           |           |
| DMRNW_015099621.1:1     | NW_015099621.1 | 1     | 400   | 400   | 1  | 4.95E-08 | 22  | 5.5   |                           |           |
| DMRNW_015099632.1:13501 | NW_015099632.1 | 13501 | 14576 | 1076  | 2  | 8.32E-15 | 28  | 2.602 |                           |           |
| DMRNW_015099641.1:1     | NW_015099641.1 | 1     | 1100  | 1100  | 3  | 1.13E-11 | 83  | 7.545 |                           |           |
| DMRNW_015099641.1:7101  | NW_015099641.1 | 7101  | 7900  | 800   | 1  | 6.79E-10 | 52  | 6.5   |                           |           |
| DMRNW_015099702.1:21901 | NW_015099702.1 | 21901 | 24300 | 2400  | 1  | 9.87E-08 | 34  | 1.417 | LOC106912646              |           |
| DMRNW_015099704.1:11401 | NW_015099704.1 | 11401 | 12000 | 600   | 2  | 9.17E-12 | 16  | 2.667 |                           |           |
| DMRNW_015099705.1:11701 | NW_015099705.1 | 11701 | 13200 | 1500  | 1  | 4.84E-08 | 10  | 0.667 |                           |           |
| DMRNW_015099717.1:1     | NW_015099717.1 | 1     | 13600 | 13600 | 28 | 2.74E-25 | 568 | 4.176 |                           |           |
| DMRNW_015099726.1:6401  | NW_015099726.1 | 6401  | 8800  | 2400  | 1  | 3.70E-08 | 56  | 2.333 |                           |           |
| DMRNW_015099728.1:1     | NW_015099728.1 | 1     | 1500  | 1500  | 2  | 2.63E-08 | 37  | 2.467 |                           |           |
| DMRNW_015099747.1:201   | NW_015099747.1 | 201   | 500   | 300   | 1  | 8.76E-08 | 3   | 1     | LOC106912689              |           |
| DMRNW_015099774.1:7301  | NW_015099774.1 | 7301  | 12400 | 5100  | 4  | 6.23E-15 | 144 | 2.824 |                           |           |
| DMRNW_015099802.1:8401  | NW_015099802.1 | 8401  | 10100 | 1700  | 6  | 5.21E-15 | 26  | 1.529 |                           |           |
| DMRNW_015099883.1:7701  | NW_015099883.1 | 7701  | 11238 | 3538  | 1  | 8.32E-10 | 45  | 1.272 |                           |           |
| DMRNW_015099902.1:1201  | NW_015099902.1 | 1201  | 2900  | 1700  | 5  | 1.96E-14 | 15  | 0.882 | LOC106912802              |           |
| DMRNW_015099928.1:17801 | NW_015099928.1 | 17801 | 18298 | 498   | 1  | 1.75E-08 | 24  | 4.819 |                           |           |
| DMRNW_015099971.1:1101  | NW_015099971.1 | 1101  | 6700  | 5600  | 1  | 4.36E-08 | 282 | 5.036 |                           |           |
| DMRNW_015100010.1:501   | NW_015100010.1 | 501   | 1700  | 1200  | 1  | 6.25E-09 | 38  | 3.167 |                           |           |
| DMRNW_015100024.1:601   | NW_015100024.1 | 601   | 1400  | 800   | 2  | 2.81E-22 | 19  | 2.375 |                           |           |
| DMRNW_015100083.1:1901  | NW_015100083.1 | 1901  | 2500  | 600   | 1  | 1.43E-08 | 22  | 3.667 |                           |           |

|                         |                |       |       |      |    |          |     |        |              |
|-------------------------|----------------|-------|-------|------|----|----------|-----|--------|--------------|
| DMRNW_015100101.1:1401  | NW_015100101.1 | 1401  | 2300  | 900  | 1  | 2.69E-08 | 18  | 2      |              |
| DMRNW_015100146.1:1     | NW_015100146.1 | 1     | 1100  | 1100 | 1  | 9.80E-08 | 58  | 5.273  |              |
| DMRNW_015100163.1:1     | NW_015100163.1 | 1     | 900   | 900  | 1  | 2.01E-15 | 4   | 0.444  |              |
| DMRNW_015100171.1:7001  | NW_015100171.1 | 7001  | 7400  | 400  | 3  | 1.42E-18 | 24  | 6      |              |
| DMRNW_015100197.1:18901 | NW_015100197.1 | 18901 | 22900 | 4000 | 2  | 2.93E-12 | 26  | 0.65   | LOC106912978 |
| DMRNW_015100201.1:1     | NW_015100201.1 | 1     | 1000  | 1000 | 1  | 4.25E-09 | 21  | 2.1    |              |
| DMRNW_015100207.1:7001  | NW_015100207.1 | 7001  | 7300  | 300  | 1  | 1.09E-09 | 2   | 0.667  |              |
| DMRNW_015100263.1:1     | NW_015100263.1 | 1     | 1800  | 1800 | 4  | 3.26E-23 | 50  | 2.778  |              |
| DMRNW_015100298.1:14201 | NW_015100298.1 | 14201 | 15600 | 1400 | 3  | 3.31E-39 | 84  | 6      | LOC106913027 |
| DMRNW_015100391.1:1     | NW_015100391.1 | 1     | 700   | 700  | 5  | 5.36E-11 | 26  | 3.714  |              |
| DMRNW_015100425.1:17001 | NW_015100425.1 | 17001 | 18200 | 1200 | 2  | 6.74E-18 | 17  | 1.417  |              |
| DMRNW_015100445.1:6401  | NW_015100445.1 | 6401  | 7600  | 1200 | 2  | 1.12E-10 | 14  | 1.167  |              |
| DMRNW_015100451.1:1     | NW_015100451.1 | 1     | 1500  | 1500 | 3  | 4.54E-24 | 22  | 1.467  |              |
| DMRNW_015100527.1:5801  | NW_015100527.1 | 5801  | 7900  | 2100 | 4  | 6.27E-16 | 129 | 6.143  |              |
| DMRNW_015100567.1:101   | NW_015100567.1 | 101   | 1400  | 1300 | 1  | 2.39E-10 | 11  | 0.846  |              |
| DMRNW_015100582.1:7101  | NW_015100582.1 | 7101  | 7800  | 700  | 7  | 8.12E-51 | 31  | 4.429  |              |
| DMRNW_015100680.1:7001  | NW_015100680.1 | 7001  | 7615  | 615  | 2  | 4.95E-12 | 1   | 0.163  |              |
| DMRNW_015100780.1:6601  | NW_015100780.1 | 6601  | 7200  | 600  | 1  | 2.17E-14 | 8   | 1.333  |              |
| DMRNW_015100788.1:6801  | NW_015100788.1 | 6801  | 7379  | 579  | 2  | 2.69E-08 | 30  | 5.181  |              |
| DMRNW_015100818.1:1     | NW_015100818.1 | 1     | 1300  | 1300 | 12 | 1.24E-37 | 15  | 1.154  | LOC106913163 |
| DMRNW_015100825.1:6901  | NW_015100825.1 | 6901  | 7260  | 360  | 2  | 1.34E-10 | 11  | 3.056  |              |
| DMRNW_015100849.1:6601  | NW_015100849.1 | 6601  | 7100  | 500  | 2  | 1.91E-19 | 1   | 0.2    |              |
| DMRNW_015100884.1:4801  | NW_015100884.1 | 4801  | 6200  | 1400 | 2  | 1.98E-12 | 25  | 1.786  |              |
| DMRNW_015100891.1:1     | NW_015100891.1 | 1     | 300   | 300  | 2  | 7.09E-16 | 9   | 3      |              |
| DMRNW_015101045.1:1     | NW_015101045.1 | 1     | 2500  | 2500 | 2  | 6.16E-28 | 44  | 1.76   |              |
| DMRNW_015101144.1:22001 | NW_015101144.1 | 22001 | 23100 | 1100 | 4  | 1.21E-17 | 19  | 1.727  |              |
| DMRNW_015101155.1:101   | NW_015101155.1 | 101   | 3500  | 3400 | 1  | 1.27E-13 | 165 | 4.853  |              |
| DMRNW_015101164.1:301   | NW_015101164.1 | 301   | 1900  | 1600 | 2  | 7.35E-11 | 37  | 2.312  |              |
| DMRNW_015101212.1:901   | NW_015101212.1 | 901   | 4085  | 3185 | 4  | 7.82E-10 | 87  | 2.732  |              |
| DMRNW_015101314.1:1     | NW_015101314.1 | 1     | 3594  | 3594 | 1  | 3.03E-08 | 42  | 1.169  |              |
| DMRNW_015101336.1:1301  | NW_015101336.1 | 1301  | 2300  | 1000 | 2  | 4.41E-10 | 9   | 0.9    |              |
| DMRNW_015101451.1:2101  | NW_015101451.1 | 2101  | 3056  | 956  | 1  | 4.38E-10 | 39  | 4.079  |              |
| DMRNW_015101452.1:1     | NW_015101452.1 | 1     | 3048  | 3048 | 1  | 1.80E-08 | 98  | 3.215  |              |
| DMRNW_015101483.1:1     | NW_015101483.1 | 1     | 200   | 200  | 1  | 1.26E-15 | 6   | 3      |              |
| DMRNW_015101526.1:1     | NW_015101526.1 | 1     | 2500  | 2500 | 3  | 1.52E-17 | 40  | 1.6    | LOC106913412 |
| DMRNW_015101658.1:1     | NW_015101658.1 | 1     | 2461  | 2461 | 3  | 7.62E-09 | 48  | 1.95   |              |
| DMRNW_015101698.1:1301  | NW_015101698.1 | 1301  | 2300  | 1000 | 3  | 1.16E-17 | 58  | 5.8    |              |
| DMRNW_015101710.1:801   | NW_015101710.1 | 801   | 2352  | 1552 | 3  | 2.01E-15 | 79  | 5.09   |              |
| DMRNW_015101795.1:301   | NW_015101795.1 | 301   | 1700  | 1400 | 1  | 6.44E-09 | 70  | 5      |              |
| DMRNW_015101872.1:1201  | NW_015101872.1 | 1201  | 1900  | 700  | 1  | 7.20E-09 | 41  | 5.857  |              |
| DMRNW_015101921.1:1     | NW_015101921.1 | 1     | 2000  | 2000 | 3  | 6.07E-11 | 27  | 1.35   | LOC106913512 |
| DMRNW_015101979.1:1     | NW_015101979.1 | 1     | 1300  | 1300 | 2  | 1.75E-09 | 25  | 1.923  |              |
| DMRNW_015101987.1:1601  | NW_015101987.1 | 1601  | 1900  | 300  | 1  | 1.44E-08 | 19  | 6.333  | LOC106913521 |
| DMRNW_015102016.1:301   | NW_015102016.1 | 301   | 1600  | 1300 | 1  | 3.70E-08 | 57  | 4.385  | LOC106913523 |
| DMRNW_015102258.1:1     | NW_015102258.1 | 1     | 1600  | 1600 | 3  | 4.21E-20 | 97  | 6.062  |              |
| DMRNW_015102345.1:1     | NW_015102345.1 | 1     | 1600  | 1600 | 3  | 2.42E-10 | 27  | 1.688  |              |
| DMRNW_015102393.1:1301  | NW_015102393.1 | 1301  | 1567  | 267  | 2  | 1.60E-20 | 5   | 1.873  |              |
| DMRNW_015102624.1:101   | NW_015102624.1 | 101   | 1434  | 1334 | 5  | 3.49E-37 | 47  | 3.523  |              |
| DMRNW_015102632.1:1     | NW_015102632.1 | 1     | 1500  | 1500 | 1  | 4.15E-08 | 77  | 5.133  |              |
| DMRNW_015102652.1:1201  | NW_015102652.1 | 1201  | 1419  | 219  | 1  | 5.67E-14 | 1   | 0.457  | LOC106913619 |
| DMRNW_015102771.1:801   | NW_015102771.1 | 801   | 1000  | 200  | 1  | 1.70E-08 | 5   | 2.5    |              |
| DMRNW_015102794.1:1     | NW_015102794.1 | 1     | 1300  | 1300 | 3  | 1.28E-11 | 56  | 4.308  |              |
| DMRNW_015102876.1:101   | NW_015102876.1 | 101   | 1300  | 1200 | 2  | 1.55E-13 | 27  | 2.25   |              |
| DMRNW_015103022.1:301   | NW_015103022.1 | 301   | 1251  | 951  | 1  | 4.47E-09 | 53  | 5.573  |              |
| DMRNW_015103081.1:201   | NW_015103081.1 | 201   | 1233  | 1033 | 1  | 1.28E-10 | 43  | 4.163  |              |
| DMRNW_015103085.1:301   | NW_015103085.1 | 301   | 1200  | 900  | 1  | 8.56E-10 | 6   | 0.667  |              |
| DMRNW_015103210.1:1     | NW_015103210.1 | 1     | 300   | 300  | 1  | 6.56E-08 | 2   | 0.667  |              |
| DMRNW_015103351.1:1     | NW_015103351.1 | 1     | 1133  | 1133 | 5  | 3.51E-32 | 20  | 1.765  |              |
| DMRNW_015103376.1:601   | NW_015103376.1 | 601   | 1100  | 500  | 1  | 3.71E-11 | 12  | 2.4    |              |
| DMRNW_015103494.1:501   | NW_015103494.1 | 501   | 1092  | 592  | 1  | 9.67E-08 | 0   | 0      |              |
| DMRNW_015103583.1:1     | NW_015103583.1 | 1     | 1065  | 1065 | 3  | 2.63E-15 | 18  | 1.69   |              |
| DMRNW_015103600.1:1     | NW_015103600.1 | 1     | 600   | 600  | 2  | 4.12E-23 | 62  | 10.333 |              |
| DMRNW_015103724.1:201   | NW_015103724.1 | 201   | 1000  | 800  | 2  | 3.87E-10 | 8   | 1      |              |
| DMRNW_015103760.1:1     | NW_015103760.1 | 1     | 800   | 800  | 4  | 1.89E-25 | 28  | 3.5    |              |
| DMRNW_015103842.1:1     | NW_015103842.1 | 1     | 200   | 200  | 1  | 1.13E-13 | 5   | 2.5    |              |
| DMRNW_015103894.1:1     | NW_015103894.1 | 1     | 400   | 400  | 1  | 1.86E-09 | 19  | 4.75   |              |
| DMRNW_015103938.1:101   | NW_015103938.1 | 101   | 800   | 700  | 1  | 6.04E-08 | 29  | 4.143  |              |
| DMRNW_015104085.1:1     | NW_015104085.1 | 1     | 900   | 900  | 1  | 8.14E-08 | 61  | 6.778  |              |
| DMRNW_015104259.1:501   | NW_015104259.1 | 501   | 800   | 300  | 1  | 1.57E-09 | 7   | 2.333  |              |
| DMRNW_015104319.1:601   | NW_015104319.1 | 601   | 865   | 265  | 2  | 7.65E-10 | 6   | 2.264  |              |
| DMRNW_015104405.1:1     | NW_015104405.1 | 1     | 845   | 845  | 1  | 9.24E-08 | 43  | 5.089  |              |

|                        |                |      |      |     |   |          |    |       |              |
|------------------------|----------------|------|------|-----|---|----------|----|-------|--------------|
| DMRNW_015104540.1:201  | NW_015104540.1 | 201  | 600  | 400 | 1 | 5.21E-10 | 8  | 2     |              |
| DMRNW_015104590.1:1    | NW_015104590.1 | 1    | 600  | 600 | 1 | 2.23E-11 | 0  | 0     |              |
| DMRNW_015104627.1:1    | NW_015104627.1 | 1    | 700  | 700 | 1 | 7.64E-10 | 37 | 5.286 |              |
| DMRNW_015104646.1:301  | NW_015104646.1 | 301  | 600  | 300 | 1 | 7.31E-13 | 14 | 4.667 |              |
| DMRNW_015104719.1:1    | NW_015104719.1 | 1    | 400  | 400 | 2 | 9.96E-10 | 12 | 3     |              |
| DMRNW_015104720.1:401  | NW_015104720.1 | 401  | 789  | 389 | 3 | 1.70E-10 | 22 | 5.656 | LOC106913754 |
| DMRNW_015104757.1:1    | NW_015104757.1 | 1    | 500  | 500 | 3 | 7.27E-15 | 8  | 1.6   |              |
| DMRNW_015104776.1:101  | NW_015104776.1 | 101  | 779  | 679 | 5 | 2.56E-42 | 29 | 4.271 |              |
| DMRNW_015104907.1:1    | NW_015104907.1 | 1    | 757  | 757 | 1 | 8.78E-11 | 1  | 0.132 |              |
| DMRNW_015105017.1:1    | NW_015105017.1 | 1    | 200  | 200 | 1 | 6.77E-09 | 4  | 2     |              |
| DMRNW_015105080.1:101  | NW_015105080.1 | 101  | 731  | 631 | 2 | 4.75E-11 | 1  | 0.158 |              |
| DMRNW_015105204.1:201  | NW_015105204.1 | 201  | 600  | 400 | 3 | 7.58E-15 | 21 | 5.25  |              |
| DMRNW_015105247.1:1    | NW_015105247.1 | 1    | 600  | 600 | 3 | 1.34E-12 | 29 | 4.833 |              |
| DMRNW_015105248.1:1    | NW_015105248.1 | 1    | 700  | 700 | 4 | 1.99E-13 | 1  | 0.143 |              |
| DMRNW_015105261.1:201  | NW_015105261.1 | 201  | 600  | 400 | 2 | 1.54E-09 | 10 | 2.5   |              |
| DMRNW_015105360.1:1    | NW_015105360.1 | 1    | 693  | 693 | 2 | 9.99E-18 | 26 | 3.752 |              |
| DMRNW_015105398.1:1    | NW_015105398.1 | 1    | 689  | 689 | 2 | 2.68E-08 | 3  | 0.435 |              |
| DMRNW_015105690.1:301  | NW_015105690.1 | 301  | 500  | 200 | 1 | 2.10E-08 | 3  | 1.5   | trnac-gca    |
| DMRNW_015105696.1:101  | NW_015105696.1 | 101  | 600  | 500 | 1 | 7.28E-15 | 17 | 3.4   |              |
| DMRNW_015105746.1:1    | NW_015105746.1 | 1    | 650  | 650 | 1 | 2.23E-11 | 10 | 1.538 |              |
| DMRNW_015105968.1:1    | NW_015105968.1 | 1    | 600  | 600 | 1 | 7.63E-12 | 20 | 3.333 |              |
| DMRNW_015106013.1:301  | NW_015106013.1 | 301  | 600  | 300 | 1 | 3.73E-12 | 9  | 3     |              |
| DMRNW_015106042.1:301  | NW_015106042.1 | 301  | 600  | 300 | 1 | 1.66E-09 | 13 | 4.333 |              |
| DMRNW_015106146.1:1    | NW_015106146.1 | 1    | 600  | 600 | 1 | 1.79E-08 | 2  | 0.333 |              |
| DMRNW_015106185.1:1    | NW_015106185.1 | 1    | 600  | 600 | 1 | 8.01E-09 | 14 | 2.333 |              |
| DMRNW_015106191.1:101  | NW_015106191.1 | 101  | 600  | 500 | 3 | 3.73E-15 | 9  | 1.8   |              |
| DMRNW_015106192.1:1    | NW_015106192.1 | 1    | 500  | 500 | 2 | 1.94E-12 | 10 | 2     |              |
| DMRNW_015106252.1:101  | NW_015106252.1 | 101  | 500  | 400 | 1 | 1.25E-08 | 21 | 5.25  |              |
| DMRNW_015106274.1:1    | NW_015106274.1 | 1    | 200  | 200 | 1 | 6.03E-08 | 9  | 4.5   |              |
| DMRNW_015106311.1:301  | NW_015106311.1 | 301  | 589  | 289 | 2 | 6.55E-11 | 13 | 4.498 |              |
| DMRNW_015106315.1:1    | NW_015106315.1 | 1    | 400  | 400 | 1 | 1.40E-09 | 11 | 2.75  |              |
| DMRNW_015106360.1:101  | NW_015106360.1 | 101  | 584  | 484 | 2 | 1.67E-11 | 10 | 2.066 |              |
| DMRNW_015106671.1:1    | NW_015106671.1 | 1    | 500  | 500 | 1 | 6.35E-08 | 4  | 0.8   |              |
| DMRNW_015106750.1:1    | NW_015106750.1 | 1    | 552  | 552 | 4 | 7.20E-12 | 10 | 1.812 |              |
| DMRNW_015107034.1:101  | NW_015107034.1 | 101  | 500  | 400 | 3 | 6.61E-20 | 12 | 3     |              |
| DMRNW_015107132.1:101  | NW_015107132.1 | 101  | 524  | 424 | 2 | 4.52E-10 | 10 | 2.358 |              |
| DMRNW_015107206.1:101  | NW_015107206.1 | 101  | 518  | 418 | 1 | 3.43E-20 | 8  | 1.914 |              |
| DMRNW_015107208.1:1    | NW_015107208.1 | 1    | 500  | 500 | 1 | 7.17E-09 | 18 | 3.6   |              |
| DMRNW_015107239.1:1    | NW_015107239.1 | 1    | 500  | 500 | 1 | 6.90E-08 | 0  | 0     |              |
| DMRNW_015107369.1:1    | NW_015107369.1 | 1    | 500  | 500 | 1 | 1.11E-08 | 21 | 4.2   |              |
| DMRNW_015107389.1:1    | NW_015107389.1 | 1    | 300  | 300 | 2 | 4.56E-13 | 6  | 2     |              |
| DMRNW_015107563.1:6801 | NW_015107563.1 | 6801 | 7100 | 300 | 2 | 3.10E-10 | 14 | 4.667 |              |
| DMRNW_015107601.1:1    | NW_015107601.1 | 1    | 486  | 486 | 1 | 8.79E-09 | 24 | 4.938 |              |
| DMRNW_015107680.1:1    | NW_015107680.1 | 1    | 481  | 481 | 2 | 1.07E-14 | 21 | 4.366 |              |
| DMRNW_015107728.1:1    | NW_015107728.1 | 1    | 478  | 478 | 4 | 3.31E-17 | 25 | 5.23  |              |
| DMRNW_015107851.1:201  | NW_015107851.1 | 201  | 400  | 200 | 1 | 6.80E-12 | 6  | 3     |              |
| DMRNW_015107892.1:1    | NW_015107892.1 | 1    | 466  | 466 | 1 | 2.43E-08 | 0  | 0     |              |
| DMRNW_015107943.1:1    | NW_015107943.1 | 1    | 400  | 400 | 1 | 5.10E-12 | 19 | 4.75  |              |
| DMRNW_015107963.1:1    | NW_015107963.1 | 1    | 462  | 462 | 2 | 8.07E-17 | 23 | 4.978 |              |
| DMRNW_015108063.1:1    | NW_015108063.1 | 1    | 456  | 456 | 3 | 9.46E-22 | 3  | 0.658 |              |
| DMRNW_015108097.1:101  | NW_015108097.1 | 101  | 453  | 353 | 1 | 6.32E-12 | 6  | 1.7   |              |
| DMRNW_015108136.1:101  | NW_015108136.1 | 101  | 450  | 350 | 1 | 2.86E-10 | 2  | 0.571 |              |
| DMRNW_015108137.1:201  | NW_015108137.1 | 201  | 400  | 200 | 2 | 5.72E-11 | 5  | 2.5   |              |
| DMRNW_015108185.1:1    | NW_015108185.1 | 1    | 400  | 400 | 1 | 1.38E-08 | 11 | 2.75  |              |
| DMRNW_015108355.1:101  | NW_015108355.1 | 101  | 400  | 300 | 1 | 8.59E-08 | 3  | 1     |              |
| DMRNW_015108429.1:1    | NW_015108429.1 | 1    | 429  | 429 | 4 | 9.88E-20 | 3  | 0.699 |              |
| DMRNW_015108444.1:101  | NW_015108444.1 | 101  | 300  | 200 | 1 | 5.07E-09 | 5  | 2.5   |              |
| DMRNW_015108536.1:1    | NW_015108536.1 | 1    | 300  | 300 | 2 | 2.25E-09 | 6  | 2     |              |
| DMRNW_015108581.1:1    | NW_015108581.1 | 1    | 418  | 418 | 1 | 2.00E-14 | 13 | 3.11  |              |
| DMRNW_015108647.1:1    | NW_015108647.1 | 1    | 413  | 413 | 3 | 2.31E-14 | 26 | 6.295 |              |
| DMRNW_015108676.1:1    | NW_015108676.1 | 1    | 400  | 400 | 3 | 2.40E-16 | 23 | 5.75  |              |
| DMRNW_015108755.1:1    | NW_015108755.1 | 1    | 300  | 300 | 1 | 1.87E-08 | 15 | 5     |              |
| DMRNW_015108854.1:1    | NW_015108854.1 | 1    | 399  | 399 | 1 | 4.56E-08 | 32 | 8.02  |              |
| DMRNW_015109173.1:1    | NW_015109173.1 | 1    | 378  | 378 | 1 | 1.26E-08 | 19 | 5.026 |              |
| DMRNW_015109193.1:1    | NW_015109193.1 | 1    | 300  | 300 | 3 | 3.41E-12 | 1  | 0.333 |              |
| DMRNW_015109229.1:1    | NW_015109229.1 | 1    | 375  | 375 | 4 | 5.89E-23 | 0  | 0     |              |
| DMRNW_015109450.1:1    | NW_015109450.1 | 1    | 360  | 360 | 3 | 5.33E-10 | 8  | 2.222 |              |
| DMRNW_015109695.1:1    | NW_015109695.1 | 1    | 300  | 300 | 1 | 6.43E-09 | 12 | 4     |              |
| DMRNW_015109837.1:1    | NW_015109837.1 | 1    | 200  | 200 | 1 | 3.62E-09 | 4  | 2     |              |
| DMRNW_015109849.1:1    | NW_015109849.1 | 1    | 200  | 200 | 1 | 4.25E-09 | 11 | 5.5   |              |
| DMRNW_015109867.1:101  | NW_015109867.1 | 101  | 335  | 235 | 1 | 2.80E-09 | 7  | 2.979 |              |

|                     |                |   |     |     |   |          |    |       |  |  |
|---------------------|----------------|---|-----|-----|---|----------|----|-------|--|--|
| DMRNW_015109976.1:1 | NW_015109976.1 | 1 | 328 | 328 | 2 | 1.03E-08 | 17 | 5.183 |  |  |
| DMRNW_015110049.1:1 | NW_015110049.1 | 1 | 300 | 300 | 1 | 2.31E-09 | 13 | 4.333 |  |  |
| DMRNW_015110275.1:1 | NW_015110275.1 | 1 | 312 | 312 | 1 | 1.37E-09 | 1  | 0.321 |  |  |
| DMRNW_015110636.1:1 | NW_015110636.1 | 1 | 292 | 292 | 1 | 6.69E-10 | 3  | 1.027 |  |  |
| DMRNW_015110737.1:1 | NW_015110737.1 | 1 | 286 | 286 | 2 | 1.64E-12 | 11 | 3.846 |  |  |
| DMRNW_015110809.1:1 | NW_015110809.1 | 1 | 282 | 282 | 1 | 5.84E-13 | 18 | 6.383 |  |  |
| DMRNW_015111023.1:1 | NW_015111023.1 | 1 | 200 | 200 | 1 | 2.46E-10 | 8  | 4     |  |  |
| DMRNW_015111031.1:1 | NW_015111031.1 | 1 | 271 | 271 | 1 | 2.75E-08 | 3  | 1.107 |  |  |
| DMRNW_015111706.1:1 | NW_015111706.1 | 1 | 239 | 239 | 1 | 1.80E-09 | 1  | 0.418 |  |  |
| DMRNW_015111780.1:1 | NW_015111780.1 | 1 | 236 | 236 | 1 | 2.48E-08 | 4  | 1.695 |  |  |
| DMRNW_015112094.1:1 | NW_015112094.1 | 1 | 222 | 222 | 1 | 3.66E-11 | 1  | 0.45  |  |  |
| DMRNW_015112287.1:1 | NW_015112287.1 | 1 | 200 | 200 | 2 | 9.15E-11 | 5  | 2.5   |  |  |

**Supplemental Table S4**  
**DMR List SMW vs NMW p<1e-07**

| DMR Name                  | Chr            | Start   | Stop     | Length | # Sig Win | minP     | CpG # | CpG Density | Gene Annotation           | Gene Category |
|---------------------------|----------------|---------|----------|--------|-----------|----------|-------|-------------|---------------------------|---------------|
| DMRNW_015094511.1:1192301 | NW_015094511.1 | 1192301 | 1192800  | 500    | 1         | 1.76E-10 | 24    | 4.8         | rbfox3;LOC106914683       |               |
| DMRNW_015094512.1:269801  | NW_015094512.1 | 269801  | 271400   | 1600   | 4         | 4.80E-12 | 32    | 2           | kctd14                    | Metabolism    |
| DMRNW_015094512.1:957401  | NW_015094512.1 | 957401  | 960500   | 3100   | 1         | 9.63E-09 | 88    | 2.839       | caln1                     | Signaling     |
| DMRNW_015094513.1:742201  | NW_015094513.1 | 742201  | 744500   | 2300   | 1         | 3.04E-09 | 44    | 1.913       | LOC106926517              |               |
| DMRNW_015094513.1:870601  | NW_015094513.1 | 870601  | 872900   | 2300   | 2         | 1.26E-10 | 68    | 2.957       | LOC106924831              |               |
| DMRNW_015094513.1:992801  | NW_015094513.1 | 992801  | 994400   | 1600   | 1         | 2.23E-08 | 47    | 2.938       | LOC106924831              |               |
| DMRNW_015094514.1:762001  | NW_015094514.1 | 762001  | 763100   | 1100   | 3         | 3.55E-12 | 21    | 1.909       |                           |               |
| DMRNW_015094516.1:125701  | NW_015094516.1 | 125701  | 126600   | 900    | 2         | 2.25E-14 | 9     | 1           |                           |               |
| DMRNW_015094516.1:918301  | NW_015094516.1 | 918301  | 919700   | 1400   | 1         | 6.53E-08 | 19    | 1.357       |                           |               |
| DMRNW_015094518.1:770401  | NW_015094518.1 | 770401  | 771600   | 1200   | 1         | 2.84E-08 | 37    | 3.083       | LOC106914036              |               |
| DMRNW_015094522.1:153301  | NW_015094522.1 | 153301  | 153700   | 400    | 1         | 3.58E-09 | 14    | 3.5         | LOC106915761              |               |
| DMRNW_015094522.1:469401  | NW_015094522.1 | 469401  | 471900   | 2500   | 1         | 2.27E-08 | 83    | 3.32        |                           |               |
| DMRNW_015094523.1:36901   | NW_015094523.1 | 36901   | 37200    | 300    | 1         | 2.54E-08 | 5     | 1.667       | LOC106916057              |               |
| DMRNW_015094523.1:313201  | NW_015094523.1 | 313201  | 313500   | 300    | 1         | 9.14E-09 | 17    | 5.667       |                           |               |
| DMRNW_015094523.1:428601  | NW_015094523.1 | 428601  | 437400   | 8800   | 1         | 3.24E-10 | 238   | 2.705       |                           |               |
| DMRNW_015094523.1:632901  | NW_015094523.1 | 632901  | 637700   | 4800   | 2         | 3.70E-24 | 143   | 2.979       | LOC106916288              |               |
| DMRNW_015094524.1:268201  | NW_015094524.1 | 268201  | 268300   | 100    | 1         | 2.90E-08 | 0     | 0           | LOC106916498              |               |
| DMRNW_015094524.1:282001  | NW_015094524.1 | 282001  | 282200   | 200    | 1         | 9.08E-08 | 11    | 5.5         | LOC106916498              |               |
| DMRNW_015094525.1:709401  | NW_015094525.1 | 709401  | 710100   | 700    | 1         | 8.99E-13 | 27    | 3.857       | LOC106917017              |               |
| DMRNW_015094526.1:41101   | NW_015094526.1 | 41101   | 42300    | 1200   | 1         | 4.59E-09 | 57    | 4.75        | LOC106917146              |               |
| DMRNW_015094527.1:651101  | NW_015094527.1 | 651101  | 651500   | 400    | 2         | 1.79E-17 | 16    | 4           |                           |               |
| DMRNW_015094529.1:788001  | NW_015094529.1 | 788001  | 789900   | 1900   | 2         | 1.09E-10 | 56    | 2.947       | efnb2                     | Signaling     |
| DMRNW_015094531.1:199601  | NW_015094531.1 | 199601  | 2.00E+05 | 400    | 1         | 5.02E-08 | 4     | 1           |                           |               |
| DMRNW_015094531.1:680401  | NW_015094531.1 | 680401  | 681000   | 600    | 1         | 3.68E-08 | 19    | 3.167       | coro1c                    | Cytoskeleton  |
| DMRNW_015094532.1:889301  | NW_015094532.1 | 889301  | 889700   | 400    | 2         | 5.11E-12 | 9     | 2.25        |                           |               |
| DMRNW_015094533.1:284601  | NW_015094533.1 | 284601  | 285900   | 1300   | 1         | 2.77E-08 | 27    | 2.077       | hhpl2                     |               |
| DMRNW_015094534.1:401401  | NW_015094534.1 | 401401  | 401900   | 500    | 2         | 6.01E-10 | 34    | 6.8         | LOC106919683              |               |
| DMRNW_015094534.1:864901  | NW_015094534.1 | 864901  | 866300   | 1400   | 2         | 5.47E-09 | 15    | 1.071       | LOC106919802              |               |
| DMRNW_015094535.1:196801  | NW_015094535.1 | 196801  | 199700   | 2900   | 2         | 2.79E-18 | 79    | 2.724       | LOC106920206              |               |
| DMRNW_015094536.1:378101  | NW_015094536.1 | 378101  | 380600   | 2500   | 1         | 2.13E-10 | 82    | 3.28        | cacna1g                   | Transport     |
| DMRNW_015094538.1:131301  | NW_015094538.1 | 131301  | 131900   | 600    | 1         | 6.44E-09 | 19    | 3.167       | LOC106921272;LOC106921280 |               |
| DMRNW_015094540.1:198301  | NW_015094540.1 | 198301  | 203800   | 5500   | 3         | 2.07E-22 | 150   | 2.727       | LOC106922645              |               |
| DMRNW_015094542.1:143401  | NW_015094542.1 | 143401  | 144200   | 800    | 1         | 3.26E-16 | 14    | 1.75        |                           |               |
| DMRNW_015094542.1:493201  | NW_015094542.1 | 493201  | 496800   | 3600   | 1         | 2.78E-10 | 124   | 3.444       |                           |               |
| DMRNW_015094542.1:607201  | NW_015094542.1 | 607201  | 608400   | 1200   | 2         | 3.43E-09 | 57    | 4.75        |                           |               |
| DMRNW_015094542.1:611701  | NW_015094542.1 | 611701  | 614000   | 2300   | 1         | 1.56E-08 | 135   | 5.87        |                           |               |
| DMRNW_015094542.1:628901  | NW_015094542.1 | 628901  | 629400   | 500    | 1         | 2.16E-10 | 4     | 0.8         |                           |               |
| DMRNW_015094543.1:386701  | NW_015094543.1 | 386701  | 387200   | 500    | 2         | 2.49E-13 | 1     | 0.2         |                           |               |
| DMRNW_015094543.1:390301  | NW_015094543.1 | 390301  | 390600   | 300    | 1         | 8.05E-08 | 1     | 0.333       |                           |               |
| DMRNW_015094545.1:469201  | NW_015094545.1 | 469201  | 474400   | 5200   | 1         | 8.39E-08 | 122   | 2.346       |                           |               |
| DMRNW_015094545.1:566201  | NW_015094545.1 | 566201  | 567200   | 1000   | 6         | 1.98E-29 | 52    | 5.2         |                           |               |
| DMRNW_015094545.1:802701  | NW_015094545.1 | 802701  | 803800   | 1100   | 1         | 8.40E-08 | 33    | 3           | LOC106924438              |               |
| DMRNW_015094546.1:778401  | NW_015094546.1 | 778401  | 780200   | 1800   | 1         | 6.02E-08 | 54    | 3           | cacna2d2                  | Transport     |
| DMRNW_015094548.1:106501  | NW_015094548.1 | 106501  | 108200   | 1700   | 1         | 1.07E-08 | 23    | 1.353       | LOC106925638              |               |
| DMRNW_015094548.1:295801  | NW_015094548.1 | 295801  | 296400   | 600    | 4         | 6.54E-24 | 7     | 1.167       |                           |               |
| DMRNW_015094548.1:560301  | NW_015094548.1 | 560301  | 565000   | 4700   | 3         | 1.13E-43 | 111   | 2.362       | drosha                    | Transcription |
| DMRNW_015094548.1:584901  | NW_015094548.1 | 584901  | 585700   | 800    | 2         | 4.81E-47 | 6     | 0.75        | drosha                    | Transcription |
| DMRNW_015094552.1:139101  | NW_015094552.1 | 139101  | 141000   | 1900   | 2         | 2.32E-09 | 40    | 2.105       |                           |               |
| DMRNW_015094553.1:330501  | NW_015094553.1 | 330501  | 340100   | 9600   | 2         | 5.33E-09 | 238   | 2.479       | LOC106927059              |               |
| DMRNW_015094553.1:642301  | NW_015094553.1 | 642301  | 647200   | 4900   | 1         | 1.84E-09 | 136   | 2.776       | LOC106927177              |               |
| DMRNW_015094555.1:209801  | NW_015094555.1 | 209801  | 210200   | 400    | 1         | 2.52E-08 | 1     | 0.25        | abhd13                    | Metabolism    |
| DMRNW_015094559.1:4501    | NW_015094559.1 | 4501    | 13100    | 8600   | 1         | 1.44E-08 | 311   | 3.616       |                           |               |
| DMRNW_015094559.1:646401  | NW_015094559.1 | 646401  | 647300   | 900    | 1         | 1.99E-12 | 27    | 3           | tspan9                    | Cytoskeleton  |
| DMRNW_015094565.1:501801  | NW_015094565.1 | 501801  | 502300   | 500    | 1         | 1.97E-08 | 12    | 2.4         | LOC106931161              |               |
| DMRNW_015094565.1:556001  | NW_015094565.1 | 556001  | 559800   | 3800   | 2         | 4.46E-11 | 58    | 1.526       | ccdc73                    |               |
| DMRNW_015094566.1:408701  | NW_015094566.1 | 408701  | 411000   | 2300   | 1         | 9.47E-09 | 79    | 3.435       |                           |               |
| DMRNW_015094567.1:133301  | NW_015094567.1 | 133301  | 137800   | 4500   | 1         | 7.30E-08 | 82    | 1.822       | kcnk12                    | Transport     |
| DMRNW_015094572.1:108601  | NW_015094572.1 | 108601  | 109100   | 500    | 1         | 4.85E-08 | 26    | 5.2         | fras1                     | Development   |
| DMRNW_015094572.1:412401  | NW_015094572.1 | 412401  | 412900   | 500    | 1         | 6.69E-08 | 23    | 4.6         | LOC106933257;LOC106933267 |               |
| DMRNW_015094573.1:229601  | NW_015094573.1 | 229601  | 232500   | 2900   | 9         | 4.40E-22 | 43    | 1.483       | LOC106933764              |               |
| DMRNW_015094573.1:241201  | NW_015094573.1 | 241201  | 243400   | 2200   | 2         | 3.31E-09 | 94    | 4.273       | LOC106933769              |               |
| DMRNW_015094574.1:41101   | NW_015094574.1 | 41101   | 41800    | 700    | 2         | 8.34E-10 | 34    | 4.857       |                           |               |
| DMRNW_015094574.1:365701  | NW_015094574.1 | 365701  | 367200   | 1500   | 1         | 1.59E-08 | 35    | 2.333       |                           |               |
| DMRNW_015094575.1:340901  | NW_015094575.1 | 340901  | 342700   | 1800   | 1         | 6.96E-14 | 76    | 4.222       | arhgap35                  | Signaling     |
| DMRNW_015094578.1:351301  | NW_015094578.1 | 351301  | 352500   | 1200   | 1         | 8.51E-08 | 12    | 1           | ltbp2                     |               |
| DMRNW_015094579.1:460901  | NW_015094579.1 | 460901  | 462500   | 1600   | 3         | 5.92E-11 | 46    | 2.875       |                           |               |

|                          |                |        |        |      |    |          |     |       |                           |               |
|--------------------------|----------------|--------|--------|------|----|----------|-----|-------|---------------------------|---------------|
| DMRNW_015094581.1:564401 | NW_015094581.1 | 564401 | 568100 | 3700 | 1  | 4.18E-09 | 57  | 1.541 | LOC106904539              |               |
| DMRNW_015094583.1:701    | NW_015094583.1 | 701    | 1600   | 900  | 5  | 7.60E-14 | 23  | 2.556 |                           |               |
| DMRNW_015094586.1:298001 | NW_015094586.1 | 298001 | 299000 | 1000 | 1  | 2.55E-09 | 19  | 1.9   | fermt2                    |               |
| DMRNW_015094586.1:505901 | NW_015094586.1 | 505901 | 508900 | 3000 | 1  | 5.14E-08 | 68  | 2.267 |                           |               |
| DMRNW_015094586.1:688901 | NW_015094586.1 | 688901 | 690200 | 1300 | 1  | 2.52E-09 | 27  | 2.077 |                           |               |
| DMRNW_015094590.1:349001 | NW_015094590.1 | 349001 | 349900 | 900  | 1  | 2.46E-10 | 28  | 3.111 | dnmbp                     | EST           |
| DMRNW_015094593.1:95801  | NW_015094593.1 | 95801  | 96200  | 400  | 1  | 6.69E-09 | 6   | 1.5   | LOC106908361              |               |
| DMRNW_015094596.1:201    | NW_015094596.1 | 201    | 600    | 400  | 1  | 9.99E-08 | 17  | 4.25  | urad                      |               |
| DMRNW_015094600.1:366401 | NW_015094600.1 | 366401 | 368700 | 2300 | 1  | 2.01E-09 | 59  | 2.565 |                           |               |
| DMRNW_015094604.1:594101 | NW_015094604.1 | 594101 | 595100 | 1000 | 1  | 5.04E-11 | 35  | 3.5   | LOC106911714              |               |
| DMRNW_015094607.1:504401 | NW_015094607.1 | 504401 | 505400 | 1000 | 1  | 1.60E-09 | 44  | 4.4   | fbxl7                     | Transcription |
| DMRNW_015094613.1:143601 | NW_015094613.1 | 143601 | 144100 | 500  | 1  | 4.05E-09 | 12  | 2.4   | LOC106913903              |               |
| DMRNW_015094614.1:352901 | NW_015094614.1 | 352901 | 353900 | 1000 | 3  | 3.85E-14 | 25  | 2.5   | plch1                     | Metabolism    |
| DMRNW_015094616.1:40001  | NW_015094616.1 | 40001  | 41900  | 1900 | 1  | 1.22E-09 | 46  | 2.421 |                           |               |
| DMRNW_015094618.1:54501  | NW_015094618.1 | 54501  | 54700  | 200  | 1  | 4.11E-11 | 0   | 0     | LOC106914045              |               |
| DMRNW_015094618.1:384601 | NW_015094618.1 | 384601 | 386900 | 2300 | 1  | 1.13E-08 | 60  | 2.609 | LOC106914058              |               |
| DMRNW_015094625.1:239301 | NW_015094625.1 | 239301 | 241500 | 2200 | 1  | 6.51E-08 | 110 | 5     | dgkd                      | Signaling     |
| DMRNW_015094625.1:289401 | NW_015094625.1 | 289401 | 290600 | 1200 | 1  | 3.86E-10 | 75  | 6.25  | tsen34                    | Transcription |
| DMRNW_015094625.1:380501 | NW_015094625.1 | 380501 | 383300 | 2800 | 2  | 2.70E-08 | 75  | 2.679 | rnpepl1                   | Metabolism    |
| DMRNW_015094625.1:386601 | NW_015094625.1 | 386601 | 388200 | 1600 | 3  | 2.66E-17 | 56  | 3.5   | rnpepl1                   | Metabolism    |
| DMRNW_015094625.1:458701 | NW_015094625.1 | 458701 | 460400 | 1700 | 2  | 1.46E-28 | 60  | 3.529 | LOC106914324              |               |
| DMRNW_015094626.1:384501 | NW_015094626.1 | 384501 | 387000 | 2500 | 1  | 1.05E-08 | 58  | 2.32  | LOC106914347              |               |
| DMRNW_015094629.1:124701 | NW_015094629.1 | 124701 | 125300 | 600  | 2  | 7.63E-09 | 12  | 2     |                           |               |
| DMRNW_015094633.1:66501  | NW_015094633.1 | 66501  | 67400  | 900  | 1  | 3.71E-09 | 25  | 2.778 | grap                      |               |
| DMRNW_015094633.1:197601 | NW_015094633.1 | 197601 | 198800 | 1200 | 1  | 3.38E-08 | 25  | 2.083 | LOC106914544              |               |
| DMRNW_015094636.1:453901 | NW_015094636.1 | 453901 | 456700 | 2800 | 1  | 1.58E-10 | 40  | 1.429 | LOC106914648;ppef1        | Signaling     |
| DMRNW_015094637.1:36201  | NW_015094637.1 | 36201  | 38600  | 2400 | 1  | 9.59E-08 | 93  | 3.875 | LOC106914654              |               |
| DMRNW_015094637.1:514201 | NW_015094637.1 | 514201 | 516800 | 2600 | 2  | 2.37E-11 | 73  | 2.808 |                           |               |
| DMRNW_015094638.1:274801 | NW_015094638.1 | 274801 | 275600 | 800  | 2  | 2.75E-08 | 33  | 4.125 | shroom4                   |               |
| DMRNW_015094639.1:155701 | NW_015094639.1 | 155701 | 159900 | 4200 | 1  | 7.82E-10 | 122 | 2.905 | zfhx4                     | Transcription |
| DMRNW_015094640.1:256201 | NW_015094640.1 | 256201 | 258900 | 2700 | 1  | 2.54E-08 | 41  | 1.519 | anks1a                    | Unknown       |
| DMRNW_015094641.1:427001 | NW_015094641.1 | 427001 | 430100 | 3100 | 10 | 2.52E-14 | 82  | 2.645 | LOC106914751;LOC106914750 |               |
| DMRNW_015094642.1:349601 | NW_015094642.1 | 349601 | 352200 | 2600 | 3  | 9.45E-14 | 63  | 2.423 | LOC106914767              |               |
| DMRNW_015094646.1:381801 | NW_015094646.1 | 381801 | 384700 | 2900 | 1  | 8.13E-08 | 29  | 1     | gria2                     | Receptor      |
| DMRNW_015094653.1:73801  | NW_015094653.1 | 73801  | 74800  | 1000 | 3  | 1.94E-10 | 52  | 5.2   | nfib;LOC106915036         | Transcription |
| DMRNW_015094653.1:118901 | NW_015094653.1 | 118901 | 121500 | 2600 | 2  | 1.20E-08 | 60  | 2.308 | zdhhc21                   | Transcription |
| DMRNW_015094659.1:144001 | NW_015094659.1 | 144001 | 146800 | 2800 | 2  | 9.95E-12 | 74  | 2.643 | dock1                     | Signaling     |
| DMRNW_015094659.1:418001 | NW_015094659.1 | 418001 | 418500 | 500  | 2  | 1.68E-14 | 16  | 3.2   | LOC106915174              |               |
| DMRNW_015094663.1:228001 | NW_015094663.1 | 228001 | 229300 | 1300 | 2  | 6.41E-10 | 28  | 2.154 |                           |               |
| DMRNW_015094665.1:102601 | NW_015094665.1 | 102601 | 104500 | 1900 | 2  | 8.29E-15 | 46  | 2.421 | xpnpep2                   | Protease      |
| DMRNW_015094668.1:81701  | NW_015094668.1 | 81701  | 82200  | 500  | 1  | 9.54E-08 | 42  | 8.4   | LOC106915388              |               |
| DMRNW_015094668.1:404401 | NW_015094668.1 | 404401 | 407500 | 3100 | 1  | 3.19E-09 | 123 | 3.968 | hoxa3;LOC106915410        | Transcription |
| DMRNW_015094669.1:159101 | NW_015094669.1 | 159101 | 159700 | 600  | 1  | 1.65E-08 | 12  | 2     | LOC106915415              |               |
| DMRNW_015094669.1:297201 | NW_015094669.1 | 297201 | 299800 | 2600 | 1  | 1.31E-08 | 63  | 2.423 |                           |               |
| DMRNW_015094677.1:180401 | NW_015094677.1 | 180401 | 181100 | 700  | 1  | 9.65E-09 | 20  | 2.857 | espn                      | Cytoskeleton  |
| DMRNW_015094677.1:454701 | NW_015094677.1 | 454701 | 455700 | 1000 | 1  | 3.29E-08 | 18  | 1.8   | LOC106915585              |               |
| DMRNW_015094678.1:475201 | NW_015094678.1 | 475201 | 482600 | 7400 | 4  | 1.80E-11 | 150 | 2.027 | LOC106915587              |               |
| DMRNW_015094678.1:484801 | NW_015094678.1 | 484801 | 493900 | 9100 | 4  | 1.40E-10 | 249 | 2.736 | LOC106915617;LOC106915589 |               |
| DMRNW_015094679.1:375901 | NW_015094679.1 | 375901 | 377100 | 1200 | 2  | 6.06E-13 | 29  | 2.417 |                           |               |
| DMRNW_015094681.1:414501 | NW_015094681.1 | 414501 | 416100 | 1600 | 1  | 1.22E-10 | 79  | 4.938 |                           |               |
| DMRNW_015094681.1:490401 | NW_015094681.1 | 490401 | 490800 | 400  | 1  | 1.07E-08 | 9   | 2.25  |                           |               |
| DMRNW_015094681.1:495901 | NW_015094681.1 | 495901 | 498400 | 2500 | 2  | 7.37E-09 | 69  | 2.76  |                           |               |
| DMRNW_015094682.1:310801 | NW_015094682.1 | 310801 | 311300 | 500  | 1  | 4.52E-10 | 24  | 4.8   | pdk3                      | Signaling     |
| DMRNW_015094683.1:200101 | NW_015094683.1 | 200101 | 200500 | 400  | 1  | 9.43E-09 | 4   | 1     | LOC106915734;LOC106915735 |               |
| DMRNW_015094684.1:14401  | NW_015094684.1 | 14401  | 15100  | 700  | 2  | 3.75E-09 | 36  | 5.143 | LOC106915756              |               |
| DMRNW_015094687.1:329001 | NW_015094687.1 | 329001 | 330800 | 1800 | 1  | 6.75E-08 | 61  | 3.389 | neto2                     | Signaling     |
| DMRNW_015094690.1:150901 | NW_015094690.1 | 150901 | 153300 | 2400 | 1  | 5.80E-08 | 76  | 3.167 | LOC106915865              |               |
| DMRNW_015094691.1:57501  | NW_015094691.1 | 57501  | 62800  | 5300 | 2  | 1.31E-09 | 76  | 1.434 |                           |               |
| DMRNW_015094692.1:195901 | NW_015094692.1 | 195901 | 197100 | 1200 | 3  | 7.75E-24 | 20  | 1.667 | ufm1                      | Proteolysis   |
| DMRNW_015094692.1:377601 | NW_015094692.1 | 377601 | 378100 | 500  | 2  | 1.59E-10 | 5   | 1     |                           |               |
| DMRNW_015094693.1:539101 | NW_015094693.1 | 539101 | 544600 | 5500 | 9  | 3.67E-17 | 151 | 2.745 | LOC106915980              |               |
| DMRNW_015094694.1:134201 | NW_015094694.1 | 134201 | 138800 | 4600 | 1  | 2.00E-09 | 136 | 2.957 | rrreb1                    | Signaling     |
| DMRNW_015094694.1:383001 | NW_015094694.1 | 383001 | 384300 | 1300 | 2  | 7.08E-24 | 70  | 5.385 | LOC106916028              |               |
| DMRNW_015094694.1:417901 | NW_015094694.1 | 417901 | 420600 | 2700 | 1  | 4.80E-16 | 79  | 2.926 | LOC106916028              |               |
| DMRNW_015094696.1:335201 | NW_015094696.1 | 335201 | 336900 | 1700 | 6  | 3.14E-09 | 96  | 5.647 |                           |               |
| DMRNW_015094696.1:339901 | NW_015094696.1 | 339901 | 341400 | 1500 | 1  | 3.61E-09 | 47  | 3.133 |                           |               |
| DMRNW_015094697.1:95101  | NW_015094697.1 | 95101  | 98300  | 3200 | 1  | 3.81E-08 | 65  | 2.031 | pou6f2                    |               |
| DMRNW_015094698.1:61901  | NW_015094698.1 | 61901  | 64100  | 2200 | 1  | 1.04E-10 | 45  | 2.045 | mylk                      |               |
| DMRNW_015094699.1:232101 | NW_015094699.1 | 232101 | 233800 | 1700 | 1  | 3.34E-10 | 78  | 4.588 | LOC106916119              |               |
| DMRNW_015094699.1:416301 | NW_015094699.1 | 416301 | 417700 | 1400 | 1  | 8.65E-11 | 38  | 2.714 | LOC106916141;LOC106916151 |               |
| DMRNW_015094702.1:102001 | NW_015094702.1 | 102001 | 104000 | 2000 | 1  | 4.72E-08 | 37  | 1.85  | LOC106916185              |               |

|                          |                |        |        |      |    |          |     |       |                           |                      |
|--------------------------|----------------|--------|--------|------|----|----------|-----|-------|---------------------------|----------------------|
| DMRNW_015094703.1:85001  | NW_015094703.1 | 85001  | 86400  | 1400 | 2  | 1.90E-08 | 28  | 2     |                           |                      |
| DMRNW_015094703.1:260101 | NW_015094703.1 | 260101 | 262400 | 2300 | 1  | 5.37E-09 | 83  | 3.609 | lhfp12                    | Transcription        |
| DMRNW_015094706.1:164401 | NW_015094706.1 | 164401 | 166300 | 1900 | 1  | 4.44E-08 | 40  | 2.105 | LOC106916272              |                      |
| DMRNW_015094709.1:19201  | NW_015094709.1 | 19201  | 19500  | 300  | 1  | 8.86E-11 | 5   | 1.667 |                           |                      |
| DMRNW_015094710.1:722101 | NW_015094710.1 | 722101 | 726000 | 3900 | 1  | 3.29E-08 | 104 | 2.667 | drp2                      | Cytoskeleton         |
| DMRNW_015094712.1:12501  | NW_015094712.1 | 12501  | 16100  | 3600 | 1  | 6.07E-09 | 72  | 2     |                           |                      |
| DMRNW_015094712.1:213401 | NW_015094712.1 | 213401 | 214500 | 1100 | 1  | 4.23E-09 | 43  | 3.909 |                           |                      |
| DMRNW_015094715.1:288801 | NW_015094715.1 | 288801 | 289500 | 700  | 1  | 1.09E-10 | 27  | 3.857 | LOC106916492;prkar2b      | Signaling            |
| DMRNW_015094718.1:366001 | NW_015094718.1 | 366001 | 369100 | 3100 | 1  | 7.06E-09 | 53  | 1.71  | LOC106916565;LOC106916567 |                      |
| DMRNW_015094721.1:298701 | NW_015094721.1 | 298701 | 300800 | 2100 | 2  | 7.88E-12 | 43  | 2.048 | LOC106916610              |                      |
| DMRNW_015094721.1:625001 | NW_015094721.1 | 625001 | 632900 | 7900 | 5  | 8.46E-18 | 279 | 3.532 | LOC106916624              |                      |
| DMRNW_015094722.1:536501 | NW_015094722.1 | 536501 | 537900 | 1400 | 3  | 3.29E-25 | 7   | 0.5   |                           |                      |
| DMRNW_015094725.1:99201  | NW_015094725.1 | 99201  | 102000 | 2800 | 2  | 8.16E-14 | 128 | 4.571 | jade2                     |                      |
| DMRNW_015094725.1:344901 | NW_015094725.1 | 344901 | 345600 | 700  | 5  | 2.22E-12 | 0   | 0     | tcf7                      | Transcription        |
| DMRNW_015094730.1:43601  | NW_015094730.1 | 43601  | 45400  | 1800 | 3  | 2.57E-12 | 78  | 4.333 |                           |                      |
| DMRNW_015094731.1:232501 | NW_015094731.1 | 232501 | 233400 | 900  | 2  | 1.31E-08 | 8   | 0.889 | LOC106916787              |                      |
| DMRNW_015094732.1:441901 | NW_015094732.1 | 441901 | 443200 | 1300 | 4  | 4.89E-30 | 61  | 4.692 | LOC106916795              |                      |
| DMRNW_015094732.1:607501 | NW_015094732.1 | 607501 | 610800 | 3300 | 2  | 6.33E-10 | 75  | 2.273 | LOC106916795              |                      |
| DMRNW_015094734.1:194901 | NW_015094734.1 | 194901 | 198900 | 4000 | 2  | 9.41E-12 | 93  | 2.325 |                           |                      |
| DMRNW_015094734.1:249201 | NW_015094734.1 | 249201 | 250200 | 1000 | 7  | 2.28E-12 | 62  | 6.2   | LOC106916839              |                      |
| DMRNW_015094737.1:17201  | NW_015094737.1 | 17201  | 17800  | 600  | 2  | 2.04E-09 | 25  | 4.167 | LOC106916918              |                      |
| DMRNW_015094737.1:287801 | NW_015094737.1 | 287801 | 290100 | 2300 | 7  | 8.72E-14 | 89  | 3.87  | pcp4l1                    |                      |
| DMRNW_015094737.1:439801 | NW_015094737.1 | 439801 | 440300 | 500  | 2  | 6.31E-27 | 13  | 2.6   |                           |                      |
| DMRNW_015094742.1:44001  | NW_015094742.1 | 44001  | 44800  | 800  | 1  | 4.05E-09 | 43  | 5.375 |                           |                      |
| DMRNW_015094746.1:18901  | NW_015094746.1 | 18901  | 22600  | 3700 | 1  | 1.61E-08 | 145 | 3.919 | eps8                      | Signaling            |
| DMRNW_015094746.1:67501  | NW_015094746.1 | 67501  | 68100  | 600  | 1  | 4.62E-09 | 35  | 5.833 | dupsp16                   | Signaling            |
| DMRNW_015094746.1:219301 | NW_015094746.1 | 219301 | 219500 | 200  | 1  | 4.52E-12 | 15  | 7.5   |                           |                      |
| DMRNW_015094746.1:237701 | NW_015094746.1 | 237701 | 240500 | 2800 | 2  | 1.83E-13 | 73  | 2.607 |                           |                      |
| DMRNW_015094746.1:295901 | NW_015094746.1 | 295901 | 298000 | 2100 | 2  | 4.29E-09 | 102 | 4.857 | LOC106917099              |                      |
| DMRNW_015094747.1:366901 | NW_015094747.1 | 366901 | 369100 | 2200 | 1  | 2.27E-08 | 29  | 1.318 | pik3cd                    | Signaling            |
| DMRNW_015094748.1:236401 | NW_015094748.1 | 236401 | 239200 | 2800 | 4  | 6.97E-30 | 61  | 2.179 | elfn1                     | Receptor             |
| DMRNW_015094749.1:444101 | NW_015094749.1 | 444101 | 444293 | 193  | 1  | 9.29E-08 | 5   | 2.591 |                           |                      |
| DMRNW_015094751.1:414901 | NW_015094751.1 | 414901 | 416900 | 2000 | 2  | 1.23E-08 | 117 | 5.85  | LOC106917192              |                      |
| DMRNW_015094753.1:50601  | NW_015094753.1 | 50601  | 52500  | 1900 | 2  | 8.68E-10 | 21  | 1.105 |                           |                      |
| DMRNW_015094757.1:133701 | NW_015094757.1 | 133701 | 134200 | 500  | 1  | 4.43E-08 | 34  | 6.8   | LOC106917284              |                      |
| DMRNW_015094757.1:432301 | NW_015094757.1 | 432301 | 433500 | 1200 | 2  | 5.43E-09 | 18  | 1.5   |                           |                      |
| DMRNW_015094765.1:454401 | NW_015094765.1 | 454401 | 456800 | 2400 | 1  | 4.84E-16 | 57  | 2.375 | LOC106917467              |                      |
| DMRNW_015094767.1:49501  | NW_015094767.1 | 49501  | 50300  | 800  | 1  | 4.11E-09 | 32  | 4     |                           |                      |
| DMRNW_015094768.1:473601 | NW_015094768.1 | 473601 | 477400 | 3800 | 2  | 4.35E-13 | 118 | 3.105 | LOC106917548              |                      |
| DMRNW_015094768.1:690801 | NW_015094768.1 | 690801 | 695500 | 4700 | 2  | 3.64E-10 | 192 | 4.085 | rfx1                      | Transcription        |
| DMRNW_015094771.1:408401 | NW_015094771.1 | 408401 | 411500 | 3100 | 4  | 1.04E-15 | 81  | 2.613 |                           |                      |
| DMRNW_015094775.1:175201 | NW_015094775.1 | 175201 | 177200 | 2000 | 2  | 3.17E-08 | 69  | 3.45  | gpc3                      | Cytoskeleton         |
| DMRNW_015094775.1:256001 | NW_015094775.1 | 256001 | 258100 | 2100 | 1  | 1.32E-09 | 69  | 3.286 | gpc3                      | Cytoskeleton         |
| DMRNW_015094777.1:163901 | NW_015094777.1 | 163901 | 164500 | 600  | 1  | 5.91E-08 | 14  | 2.333 |                           |                      |
| DMRNW_015094778.1:123901 | NW_015094778.1 | 123901 | 125200 | 1300 | 1  | 1.97E-08 | 63  | 4.846 |                           |                      |
| DMRNW_015094780.1:48101  | NW_015094780.1 | 48101  | 49500  | 1400 | 1  | 2.65E-08 | 43  | 3.071 | exoc5                     | Metabolism           |
| DMRNW_015094799.1:473701 | NW_015094799.1 | 473701 | 474600 | 900  | 1  | 8.87E-08 | 36  | 4     | LOC106918190              |                      |
| DMRNW_015094799.1:525401 | NW_015094799.1 | 525401 | 528900 | 3500 | 11 | 9.03E-17 | 95  | 2.714 | LOC106918190              |                      |
| DMRNW_015094813.1:314301 | NW_015094813.1 | 314301 | 315700 | 1400 | 1  | 4.43E-09 | 63  | 4.5   | smarce1                   | Transcription        |
| DMRNW_015094813.1:321901 | NW_015094813.1 | 321901 | 322800 | 900  | 1  | 1.33E-09 | 16  | 1.778 | smarce1                   | Transcription        |
| DMRNW_015094817.1:175401 | NW_015094817.1 | 175401 | 177900 | 2500 | 1  | 9.29E-08 | 60  | 2.4   | tex264                    | Development          |
| DMRNW_015094818.1:72701  | NW_015094818.1 | 72701  | 73900  | 1200 | 2  | 3.43E-09 | 59  | 4.917 | rhm15                     | Transcription        |
| DMRNW_015094827.1:387101 | NW_015094827.1 | 387101 | 389300 | 2200 | 4  | 1.11E-16 | 67  | 3.045 | wdr11                     |                      |
| DMRNW_015094829.1:82401  | NW_015094829.1 | 82401  | 82900  | 500  | 1  | 3.52E-10 | 16  | 3.2   | LOC106918736              |                      |
| DMRNW_015094829.1:383101 | NW_015094829.1 | 383101 | 386900 | 3800 | 9  | 5.38E-28 | 129 | 3.395 |                           |                      |
| DMRNW_015094834.1:258101 | NW_015094834.1 | 258101 | 259700 | 1600 | 1  | 5.58E-09 | 35  | 2.188 | LOC106918828              |                      |
| DMRNW_015094835.1:701    | NW_015094835.1 | 701    | 2100   | 1400 | 1  | 2.19E-08 | 43  | 3.071 |                           |                      |
| DMRNW_015094835.1:108701 | NW_015094835.1 | 108701 | 109100 | 400  | 1  | 1.45E-08 | 10  | 2.5   | LOC106918850              |                      |
| DMRNW_015094835.1:322201 | NW_015094835.1 | 322201 | 322800 | 600  | 1  | 5.52E-08 | 38  | 6.333 | cdh13                     | Extracellular Matrix |
| DMRNW_015094840.1:147901 | NW_015094840.1 | 147901 | 152500 | 4600 | 2  | 3.83E-13 | 104 | 2.261 | LOC106918932              |                      |
| DMRNW_015094841.1:506701 | NW_015094841.1 | 506701 | 507200 | 500  | 1  | 2.26E-10 | 14  | 2.8   |                           |                      |
| DMRNW_015094841.1:526101 | NW_015094841.1 | 526101 | 528500 | 2400 | 3  | 1.12E-11 | 60  | 2.5   |                           |                      |
| DMRNW_015094842.1:266901 | NW_015094842.1 | 266901 | 267600 | 700  | 1  | 4.89E-09 | 9   | 1.286 |                           |                      |
| DMRNW_015094842.1:363801 | NW_015094842.1 | 363801 | 364700 | 900  | 3  | 4.99E-14 | 11  | 1.222 |                           |                      |
| DMRNW_015094842.1:370701 | NW_015094842.1 | 370701 | 372700 | 2000 | 2  | 4.24E-18 | 45  | 2.25  |                           |                      |
| DMRNW_015094843.1:169101 | NW_015094843.1 | 169101 | 170300 | 1200 | 1  | 2.49E-08 | 29  | 2.417 | prdm6                     | Transcription        |
| DMRNW_015094843.1:195001 | NW_015094843.1 | 195001 | 199300 | 4300 | 6  | 2.37E-17 | 75  | 1.744 | prdm6;LOC106918988        | Transcription        |
| DMRNW_015094843.1:200501 | NW_015094843.1 | 200501 | 201300 | 800  | 1  | 5.51E-09 | 19  | 2.375 | prdm6;LOC106918988        | Transcription        |
| DMRNW_015094843.1:213801 | NW_015094843.1 | 213801 | 219000 | 5200 | 2  | 3.87E-22 | 138 | 2.654 | prdm6                     | Transcription        |
| DMRNW_015094843.1:361401 | NW_015094843.1 | 361401 | 364000 | 2600 | 1  | 1.14E-09 | 74  | 2.846 | LOC106918994              |                      |
| DMRNW_015094847.1:288001 | NW_015094847.1 | 288001 | 290100 | 2100 | 1  | 3.02E-08 | 44  | 2.095 | LOC106919051              |                      |

|                          |                |        |        |      |   |          |     |       |                                        |                            |
|--------------------------|----------------|--------|--------|------|---|----------|-----|-------|----------------------------------------|----------------------------|
| DMRNW_015094855.1:62701  | NW_015094855.1 | 62701  | 64800  | 2100 | 1 | 3.26E-10 | 66  | 3.143 | LOC106919159                           |                            |
| DMRNW_015094856.1:3801   | NW_015094856.1 | 3801   | 8100   | 4300 | 1 | 9.78E-08 | 108 | 2.512 |                                        |                            |
| DMRNW_015094856.1:186401 | NW_015094856.1 | 186401 | 188700 | 2300 | 1 | 9.41E-08 | 68  | 2.957 | LOC106919169                           |                            |
| DMRNW_015094857.1:3601   | NW_015094857.1 | 3601   | 6900   | 3300 | 9 | 2.13E-11 | 39  | 1.182 | LOC106919185;LOC106919182              |                            |
| DMRNW_015094858.1:360601 | NW_015094858.1 | 360601 | 364200 | 3600 | 1 | 2.14E-08 | 59  | 1.639 | LOC106919226                           |                            |
| DMRNW_015094860.1:28001  | NW_015094860.1 | 28001  | 28600  | 600  | 1 | 5.48E-08 | 25  | 4.167 |                                        |                            |
| DMRNW_015094860.1:135801 | NW_015094860.1 | 135801 | 136400 | 600  | 1 | 3.68E-10 | 13  | 2.167 |                                        |                            |
| DMRNW_015094863.1:126801 | NW_015094863.1 | 126801 | 130700 | 3900 | 5 | 9.93E-10 | 138 | 3.538 | LOC106919291                           |                            |
| DMRNW_015094863.1:268301 | NW_015094863.1 | 268301 | 269200 | 900  | 1 | 8.97E-10 | 20  | 2.222 | gucy1b3                                | Metabolism                 |
| DMRNW_015094864.1:378701 | NW_015094864.1 | 378701 | 379200 | 500  | 1 | 1.03E-08 | 19  | 3.8   | LOC106919354                           |                            |
| DMRNW_015094867.1:206301 | NW_015094867.1 | 206301 | 208200 | 1900 | 1 | 2.78E-08 | 91  | 4.789 | abr                                    | Signaling                  |
| DMRNW_015094872.1:152701 | NW_015094872.1 | 152701 | 154600 | 1900 | 1 | 2.28E-12 | 72  | 3.789 | nlg3                                   | Signaling                  |
| DMRNW_015094872.1:213301 | NW_015094872.1 | 213301 | 216900 | 3600 | 1 | 1.65E-08 | 75  | 2.083 | nlg3                                   | Signaling                  |
| DMRNW_015094875.1:314401 | NW_015094875.1 | 314401 | 319600 | 5200 | 1 | 5.19E-08 | 87  | 1.673 | wnk4                                   |                            |
| DMRNW_015094877.1:23101  | NW_015094877.1 | 23101  | 25000  | 1900 | 1 | 1.63E-08 | 49  | 2.579 | LOC106919537                           |                            |
| DMRNW_015094879.1:306601 | NW_015094879.1 | 306601 | 306800 | 200  | 1 | 3.10E-08 | 5   | 2.5   | LOC106919581                           |                            |
| DMRNW_015094879.1:315001 | NW_015094879.1 | 315001 | 315800 | 800  | 2 | 7.26E-10 | 17  | 2.125 | LOC106919581                           |                            |
| DMRNW_015094879.1:347601 | NW_015094879.1 | 347601 | 348300 | 700  | 1 | 1.13E-08 | 26  | 3.714 | nhej1;LOC106919594                     |                            |
| DMRNW_015094879.1:369501 | NW_015094879.1 | 369501 | 370500 | 1000 | 1 | 1.55E-08 | 46  | 4.6   | LOC106919594;LOC106919586              |                            |
| DMRNW_015094881.1:264301 | NW_015094881.1 | 264301 | 268200 | 3900 | 2 | 7.15E-10 | 112 | 2.872 | LOC106919638                           |                            |
| DMRNW_015094883.1:87001  | NW_015094883.1 | 87001  | 93500  | 6500 | 3 | 5.48E-11 | 230 | 3.538 | LOC106919668                           |                            |
| DMRNW_015094884.1:239601 | NW_015094884.1 | 239601 | 239900 | 300  | 1 | 1.73E-09 | 7   | 2.333 |                                        |                            |
| DMRNW_015094884.1:326201 | NW_015094884.1 | 326201 | 329900 | 3700 | 1 | 2.65E-08 | 134 | 3.622 | scg3;LOC106919704                      | Unknown                    |
| DMRNW_015094885.1:280201 | NW_015094885.1 | 280201 | 280500 | 300  | 2 | 4.38E-45 | 7   | 2.333 | myo10                                  | Cytoskeleton               |
| DMRNW_015094886.1:63901  | NW_015094886.1 | 63901  | 66900  | 3000 | 1 | 4.97E-08 | 84  | 2.8   |                                        |                            |
| DMRNW_015094889.1:370801 | NW_015094889.1 | 370801 | 372300 | 1500 | 1 | 1.27E-09 | 33  | 2.2   |                                        |                            |
| DMRNW_015094891.1:321801 | NW_015094891.1 | 321801 | 326300 | 4500 | 2 | 2.44E-09 | 204 | 4.533 | tmem74                                 | Signaling                  |
| DMRNW_015094893.1:89901  | NW_015094893.1 | 89901  | 92800  | 2900 | 2 | 3.66E-08 | 27  | 0.931 | LOC106919824                           |                            |
| DMRNW_015094894.1:474601 | NW_015094894.1 | 474601 | 479700 | 5100 | 1 | 4.07E-08 | 100 | 1.961 | gpr143;LOC106919849                    |                            |
| DMRNW_015094895.1:103101 | NW_015094895.1 | 103101 | 104400 | 1300 | 1 | 3.25E-09 | 52  | 4     | inha                                   | Growth Factors & Cytokines |
| DMRNW_015094899.1:330501 | NW_015094899.1 | 330501 | 331100 | 600  | 1 | 8.02E-09 | 29  | 4.833 | LOC106919911                           |                            |
| DMRNW_015094904.1:267501 | NW_015094904.1 | 267501 | 272400 | 4900 | 1 | 3.86E-08 | 94  | 1.918 | nphp4                                  | Development                |
| DMRNW_015094910.1:401    | NW_015094910.1 | 401    | 1400   | 1000 | 1 | 2.99E-08 | 7   | 0.7   |                                        |                            |
| DMRNW_015094911.1:175701 | NW_015094911.1 | 175701 | 176500 | 800  | 1 | 4.74E-08 | 22  | 2.75  | arid3a                                 | Transcription              |
| DMRNW_015094912.1:104001 | NW_015094912.1 | 104001 | 105700 | 1700 | 4 | 1.40E-12 | 19  | 1.118 | LOC106920123                           |                            |
| DMRNW_015094914.1:112101 | NW_015094914.1 | 112101 | 112400 | 300  | 1 | 1.69E-14 | 14  | 4.667 | epha8                                  |                            |
| DMRNW_015094919.1:201701 | NW_015094919.1 | 201701 | 205000 | 3300 | 3 | 3.04E-09 | 88  | 2.667 |                                        |                            |
| DMRNW_015094920.1:110001 | NW_015094920.1 | 110001 | 110600 | 600  | 1 | 5.37E-09 | 10  | 1.667 |                                        |                            |
| DMRNW_015094932.1:844901 | NW_015094932.1 | 844901 | 845400 | 500  | 1 | 2.85E-09 | 5   | 1     |                                        |                            |
| DMRNW_015094933.1:334801 | NW_015094933.1 | 334801 | 336100 | 1300 | 2 | 1.45E-10 | 56  | 4.308 | LOC106920452                           |                            |
| DMRNW_015094934.1:126001 | NW_015094934.1 | 126001 | 128000 | 2000 | 5 | 1.72E-14 | 52  | 2.6   |                                        |                            |
| DMRNW_015094938.1:179601 | NW_015094938.1 | 179601 | 184000 | 4400 | 8 | 1.03E-09 | 194 | 4.409 | LOC106920532;LOC106920533;LOC106920531 |                            |
| DMRNW_015094940.1:297501 | NW_015094940.1 | 297501 | 297800 | 300  | 2 | 2.85E-10 | 3   | 1     |                                        |                            |
| DMRNW_015094942.1:226401 | NW_015094942.1 | 226401 | 226800 | 400  | 1 | 1.68E-08 | 15  | 3.75  |                                        |                            |
| DMRNW_015094953.1:438601 | NW_015094953.1 | 438601 | 439600 | 1000 | 1 | 6.20E-08 | 42  | 4.2   | slc25a21                               | Binding Protein            |
| DMRNW_015094955.1:95701  | NW_015094955.1 | 95701  | 99800  | 4100 | 6 | 1.76E-12 | 157 | 3.829 | arhgap21                               |                            |
| DMRNW_015094955.1:113301 | NW_015094955.1 | 113301 | 116500 | 3200 | 1 | 2.34E-08 | 94  | 2.938 | arhgap21                               |                            |
| DMRNW_015094959.1:109501 | NW_015094959.1 | 109501 | 109800 | 300  | 2 | 6.79E-22 | 5   | 1.667 |                                        |                            |
| DMRNW_015094959.1:141401 | NW_015094959.1 | 141401 | 144800 | 3400 | 1 | 1.02E-11 | 76  | 2.235 | trps1                                  | Development                |
| DMRNW_015094962.1:364501 | NW_015094962.1 | 364501 | 365500 | 1000 | 2 | 7.56E-09 | 18  | 1.8   | LOC106920876                           |                            |
| DMRNW_015094964.1:170101 | NW_015094964.1 | 170101 | 171000 | 900  | 1 | 2.00E-09 | 41  | 4.556 |                                        |                            |
| DMRNW_015094965.1:1      | NW_015094965.1 | 1      | 800    | 800  | 1 | 1.21E-08 | 30  | 3.75  |                                        |                            |
| DMRNW_015094975.1:40301  | NW_015094975.1 | 40301  | 40700  | 400  | 1 | 1.31E-09 | 15  | 3.75  | LOC106921084                           |                            |
| DMRNW_015094979.1:181001 | NW_015094979.1 | 181001 | 183600 | 2600 | 1 | 6.10E-12 | 53  | 2.038 | LOC106921130                           |                            |
| DMRNW_015094979.1:209201 | NW_015094979.1 | 209201 | 212000 | 2800 | 3 | 8.19E-20 | 39  | 1.393 | ahnak2                                 |                            |
| DMRNW_015094983.1:262701 | NW_015094983.1 | 262701 | 263200 | 500  | 1 | 4.83E-08 | 17  | 3.4   | raver2                                 | Transcription              |
| DMRNW_015094988.1:187501 | NW_015094988.1 | 187501 | 189400 | 1900 | 1 | 5.74E-08 | 45  | 2.368 | LOC106921283                           |                            |
| DMRNW_015094988.1:389901 | NW_015094988.1 | 389901 | 390700 | 800  | 1 | 6.53E-09 | 27  | 3.375 | sv2c                                   | Development                |
| DMRNW_015094991.1:39401  | NW_015094991.1 | 39401  | 39600  | 200  | 1 | 8.61E-09 | 1   | 0.5   | gucy1a2                                | Signaling                  |
| DMRNW_015094994.1:213101 | NW_015094994.1 | 213101 | 215200 | 2100 | 1 | 3.12E-09 | 73  | 3.476 | LOC106921416                           |                            |
| DMRNW_015094995.1:139801 | NW_015094995.1 | 139801 | 140000 | 200  | 1 | 1.51E-10 | 3   | 1.5   |                                        |                            |
| DMRNW_015094995.1:252401 | NW_015094995.1 | 252401 | 253300 | 900  | 1 | 3.07E-08 | 57  | 6.333 | LOC106921426                           |                            |
| DMRNW_015094997.1:184801 | NW_015094997.1 | 184801 | 187300 | 2500 | 1 | 1.62E-12 | 44  | 1.76  |                                        |                            |
| DMRNW_015094998.1:226701 | NW_015094998.1 | 226701 | 231400 | 4700 | 1 | 1.19E-09 | 145 | 3.085 | sptbn4                                 | Cytoskeleton               |
| DMRNW_015095002.1:158701 | NW_015095002.1 | 158701 | 162400 | 3700 | 1 | 2.96E-09 | 70  | 1.892 |                                        |                            |
| DMRNW_015095003.1:72801  | NW_015095003.1 | 72801  | 73100  | 300  | 2 | 1.06E-10 | 6   | 2     | LOC106921526                           |                            |
| DMRNW_015095007.1:277601 | NW_015095007.1 | 277601 | 279500 | 1900 | 1 | 2.55E-09 | 47  | 2.474 |                                        |                            |
| DMRNW_015095007.1:318401 | NW_015095007.1 | 318401 | 319700 | 1300 | 2 | 3.03E-16 | 22  | 1.692 |                                        |                            |
| DMRNW_015095010.1:150901 | NW_015095010.1 | 150901 | 151300 | 400  | 1 | 4.52E-08 | 3   | 0.75  | LOC106921627                           |                            |
| DMRNW_015095013.1:282201 | NW_015095013.1 | 282201 | 282800 | 600  | 1 | 6.80E-08 | 18  | 3     | znf423                                 | Transcription              |



|                          |                |        |        |      |   |          |     |       |                           |                      |
|--------------------------|----------------|--------|--------|------|---|----------|-----|-------|---------------------------|----------------------|
| DMRNW_015095020.1:141801 | NW_015095020.1 | 141801 | 143000 | 1200 | 4 | 3.06E-14 | 37  | 3.083 |                           |                      |
| DMRNW_015095023.1:75201  | NW_015095023.1 | 75201  | 75500  | 300  | 1 | 7.23E-11 | 4   | 1.333 |                           |                      |
| DMRNW_015095030.1:159901 | NW_015095030.1 | 159901 | 160300 | 400  | 2 | 2.25E-13 | 18  | 4.5   | LOC106921873              |                      |
| DMRNW_015095030.1:252801 | NW_015095030.1 | 252801 | 253500 | 700  | 1 | 5.32E-08 | 13  | 1.857 | LOC106921874              |                      |
| DMRNW_015095032.1:55201  | NW_015095032.1 | 55201  | 56500  | 1300 | 1 | 4.71E-08 | 38  | 2.923 | gja5                      |                      |
| DMRNW_015095036.1:2901   | NW_015095036.1 | 2901   | 4900   | 2000 | 1 | 7.36E-08 | 57  | 2.85  |                           |                      |
| DMRNW_015095036.1:80201  | NW_015095036.1 | 80201  | 81400  | 1200 | 1 | 6.69E-08 | 12  | 1     | gpat2                     | Metabolism           |
| DMRNW_015095042.1:586401 | NW_015095042.1 | 586401 | 587000 | 600  | 1 | 5.48E-08 | 28  | 4.667 | LOC106922060              |                      |
| DMRNW_015095051.1:295401 | NW_015095051.1 | 295401 | 299000 | 3600 | 2 | 7.36E-10 | 109 | 3.028 | nyap1;LOC106922191        |                      |
| DMRNW_015095052.1:29801  | NW_015095052.1 | 29801  | 32300  | 2500 | 1 | 2.58E-09 | 48  | 1.92  | LOC106922195              |                      |
| DMRNW_015095052.1:34301  | NW_015095052.1 | 34301  | 36300  | 2000 | 1 | 7.92E-09 | 37  | 1.85  | LOC106922195              |                      |
| DMRNW_015095052.1:40501  | NW_015095052.1 | 40501  | 43900  | 3400 | 6 | 5.73E-12 | 27  | 0.794 |                           |                      |
| DMRNW_015095057.1:601301 | NW_015095057.1 | 601301 | 603400 | 2100 | 4 | 1.98E-09 | 57  | 2.714 | LOC106922328              |                      |
| DMRNW_015095065.1:104401 | NW_015095065.1 | 104401 | 105000 | 600  | 1 | 4.55E-09 | 14  | 2.333 | LOC106922390              |                      |
| DMRNW_015095066.1:5401   | NW_015095066.1 | 5401   | 6000   | 600  | 1 | 1.38E-08 | 11  | 1.833 |                           |                      |
| DMRNW_015095066.1:10801  | NW_015095066.1 | 10801  | 11100  | 300  | 1 | 5.91E-08 | 2   | 0.667 |                           |                      |
| DMRNW_015095068.1:247801 | NW_015095068.1 | 247801 | 252500 | 4700 | 2 | 4.64E-14 | 96  | 2.043 | arvcf                     | Extracellular Matrix |
| DMRNW_015095071.1:571101 | NW_015095071.1 | 571101 | 572300 | 1200 | 1 | 7.73E-09 | 27  | 2.25  |                           |                      |
| DMRNW_015095074.1:266201 | NW_015095074.1 | 266201 | 266400 | 200  | 2 | 1.15E-22 | 6   | 3     | dnah9                     | Cytoskeleton         |
| DMRNW_015095076.1:269301 | NW_015095076.1 | 269301 | 269700 | 400  | 1 | 3.98E-10 | 17  | 4.25  |                           |                      |
| DMRNW_015095078.1:153701 | NW_015095078.1 | 153701 | 154000 | 300  | 1 | 1.97E-08 | 9   | 3     |                           |                      |
| DMRNW_015095080.1:146001 | NW_015095080.1 | 146001 | 148400 | 2400 | 1 | 3.44E-08 | 59  | 2.458 | slc26a6                   | Metabolism           |
| DMRNW_015095080.1:184401 | NW_015095080.1 | 184401 | 187600 | 3200 | 1 | 8.51E-12 | 75  | 2.344 | LOC106922584;celsr3       | Receptor             |
| DMRNW_015095084.1:179601 | NW_015095084.1 | 179601 | 180000 | 400  | 1 | 9.06E-08 | 6   | 1.5   | LOC106922640              |                      |
| DMRNW_015095087.1:222901 | NW_015095087.1 | 222901 | 223900 | 1000 | 2 | 3.31E-08 | 25  | 2.5   | LOC106922685              |                      |
| DMRNW_015095088.1:77901  | NW_015095088.1 | 77901  | 80200  | 2300 | 2 | 2.63E-13 | 63  | 2.739 | LOC106922696              |                      |
| DMRNW_015095088.1:106001 | NW_015095088.1 | 106001 | 107500 | 1500 | 1 | 3.45E-08 | 60  | 4     | LOC106922700;LOC106922698 |                      |
| DMRNW_015095094.1:32501  | NW_015095094.1 | 32501  | 33900  | 1400 | 1 | 8.64E-09 | 47  | 3.357 | LOC106922796              |                      |
| DMRNW_015095095.1:225601 | NW_015095095.1 | 225601 | 229700 | 4100 | 2 | 4.06E-09 | 129 | 3.146 | actn4                     | Cytoskeleton         |
| DMRNW_015095099.1:133501 | NW_015095099.1 | 133501 | 134000 | 500  | 1 | 6.40E-08 | 27  | 5.4   | tmem150b                  |                      |
| DMRNW_015095099.1:136201 | NW_015095099.1 | 136201 | 137100 | 900  | 1 | 5.44E-08 | 71  | 7.889 | igfbp7                    | Unknown              |
| DMRNW_015095108.1:6501   | NW_015095108.1 | 6501   | 8700   | 2200 | 5 | 9.06E-14 | 63  | 2.864 |                           |                      |
| DMRNW_015095109.1:185701 | NW_015095109.1 | 185701 | 187300 | 1600 | 2 | 1.15E-11 | 48  | 3     | LOC106923075;LOC106923078 |                      |
| DMRNW_015095109.1:219901 | NW_015095109.1 | 219901 | 227600 | 7700 | 1 | 9.42E-08 | 259 | 3.364 | LOC106923075              |                      |
| DMRNW_015095116.1:372701 | NW_015095116.1 | 372701 | 374000 | 1300 | 1 | 7.57E-08 | 73  | 5.615 | LOC106923177;LOC106923178 |                      |
| DMRNW_015095121.1:300301 | NW_015095121.1 | 300301 | 303600 | 3300 | 2 | 3.44E-14 | 76  | 2.303 | LOC106923270              |                      |
| DMRNW_015095128.1:208101 | NW_015095128.1 | 208101 | 209200 | 1100 | 1 | 1.45E-10 | 12  | 1.091 | LOC106923350;LOC106923351 |                      |
| DMRNW_015095135.1:79201  | NW_015095135.1 | 79201  | 83800  | 4600 | 2 | 4.70E-10 | 149 | 3.239 | LOC106923452              |                      |
| DMRNW_015095139.1:401    | NW_015095139.1 | 401    | 2700   | 2300 | 1 | 1.51E-08 | 41  | 1.783 |                           |                      |
| DMRNW_015095141.1:27201  | NW_015095141.1 | 27201  | 27700  | 500  | 1 | 2.32E-08 | 7   | 1.4   |                           |                      |
| DMRNW_015095141.1:288701 | NW_015095141.1 | 288701 | 290500 | 1800 | 1 | 1.61E-08 | 44  | 2.444 |                           |                      |
| DMRNW_015095146.1:33701  | NW_015095146.1 | 33701  | 35300  | 1600 | 1 | 1.07E-08 | 69  | 4.312 | wdr3                      |                      |
| DMRNW_015095148.1:148301 | NW_015095148.1 | 148301 | 148800 | 500  | 2 | 1.37E-10 | 4   | 0.8   | LOC106923619              |                      |
| DMRNW_015095149.1:283101 | NW_015095149.1 | 283101 | 285100 | 2000 | 3 | 8.20E-11 | 57  | 2.85  |                           |                      |
| DMRNW_015095153.1:166601 | NW_015095153.1 | 166601 | 167600 | 1000 | 3 | 2.24E-20 | 73  | 7.3   | LOC106923708              |                      |
| DMRNW_015095161.1:234801 | NW_015095161.1 | 234801 | 237200 | 2400 | 1 | 1.72E-08 | 56  | 2.333 |                           |                      |
| DMRNW_015095162.1:33501  | NW_015095162.1 | 33501  | 34300  | 800  | 2 | 1.15E-11 | 27  | 3.375 |                           |                      |
| DMRNW_015095169.1:39301  | NW_015095169.1 | 39301  | 40400  | 1100 | 1 | 5.50E-08 | 25  | 2.273 | LOC106923886              |                      |
| DMRNW_015095170.1:139801 | NW_015095170.1 | 139801 | 142800 | 3000 | 1 | 1.97E-08 | 85  | 2.833 | unc13c                    | Development          |
| DMRNW_015095173.1:275901 | NW_015095173.1 | 275901 | 276400 | 500  | 1 | 4.02E-08 | 28  | 5.6   | LOC106923922              |                      |
| DMRNW_015095185.1:186501 | NW_015095185.1 | 186501 | 187000 | 500  | 1 | 3.16E-09 | 16  | 3.2   | LOC106924129              |                      |
| DMRNW_015095196.1:270001 | NW_015095196.1 | 270001 | 271400 | 1400 | 2 | 1.65E-08 | 76  | 5.429 |                           |                      |
| DMRNW_015095197.1:125401 | NW_015095197.1 | 125401 | 126300 | 900  | 3 | 2.11E-12 | 41  | 4.556 | celsr2                    | Cytoskeleton         |
| DMRNW_015095198.1:20401  | NW_015095198.1 | 20401  | 21800  | 1400 | 7 | 3.78E-31 | 44  | 3.143 | unc119                    | Receptor             |
| DMRNW_015095200.1:35701  | NW_015095200.1 | 35701  | 39700  | 4000 | 2 | 1.75E-10 | 83  | 2.075 |                           |                      |
| DMRNW_015095205.1:225101 | NW_015095205.1 | 225101 | 225600 | 500  | 1 | 4.22E-08 | 32  | 6.4   | LOC106924394              |                      |
| DMRNW_015095208.1:69101  | NW_015095208.1 | 69101  | 75600  | 6500 | 3 | 2.45E-12 | 100 | 1.538 |                           |                      |
| DMRNW_015095209.1:58001  | NW_015095209.1 | 58001  | 58700  | 700  | 1 | 7.21E-09 | 4   | 0.571 |                           |                      |
| DMRNW_015095218.1:145801 | NW_015095218.1 | 145801 | 146200 | 400  | 2 | 5.22E-13 | 23  | 5.75  | crat                      |                      |
| DMRNW_015095220.1:11501  | NW_015095220.1 | 11501  | 12300  | 800  | 2 | 7.04E-08 | 28  | 3.5   | LOC106924638              |                      |
| DMRNW_015095220.1:92001  | NW_015095220.1 | 92001  | 100600 | 8600 | 1 | 6.98E-08 | 237 | 2.756 | LOC106924647;LOC106924648 |                      |
| DMRNW_015095220.1:141301 | NW_015095220.1 | 141301 | 141900 | 600  | 2 | 1.73E-08 | 18  | 3     | LOC106924627              |                      |
| DMRNW_015095227.1:89501  | NW_015095227.1 | 89501  | 90800  | 1300 | 4 | 7.00E-16 | 49  | 3.769 | pacs2                     |                      |
| DMRNW_015095229.1:183401 | NW_015095229.1 | 183401 | 189500 | 6100 | 7 | 1.99E-10 | 287 | 4.705 | LOC106924783;LOC106924784 |                      |
| DMRNW_015095231.1:7901   | NW_015095231.1 | 7901   | 10300  | 2400 | 2 | 8.17E-13 | 54  | 2.25  | LOC106924804              |                      |
| DMRNW_015095232.1:322601 | NW_015095232.1 | 322601 | 323600 | 1000 | 1 | 8.47E-08 | 28  | 2.8   | ptprn2                    | Signaling            |
| DMRNW_015095232.1:419901 | NW_015095232.1 | 419901 | 421600 | 1700 | 2 | 1.04E-09 | 44  | 2.588 | ptprn2                    | Signaling            |
| DMRNW_015095236.1:18201  | NW_015095236.1 | 18201  | 18600  | 400  | 2 | 4.35E-10 | 20  | 5     |                           |                      |
| DMRNW_015095236.1:178901 | NW_015095236.1 | 178901 | 179200 | 300  | 1 | 4.16E-11 | 13  | 4.333 | LOC106924875              |                      |
| DMRNW_015095240.1:42301  | NW_015095240.1 | 42301  | 44700  | 2400 | 2 | 3.51E-09 | 70  | 2.917 |                           |                      |
| DMRNW_015095243.1:118901 | NW_015095243.1 | 118901 | 121500 | 2600 | 1 | 9.52E-08 | 59  | 2.269 | LOC106924931              |                      |

|                          |                |        |        |      |    |          |     |       |                           |               |
|--------------------------|----------------|--------|--------|------|----|----------|-----|-------|---------------------------|---------------|
| DMRNW_015095244.1:193301 | NW_015095244.1 | 193301 | 195700 | 2400 | 2  | 1.31E-09 | 57  | 2.375 | tceanc                    | Transcription |
| DMRNW_015095249.1:219501 | NW_015095249.1 | 219501 | 220000 | 500  | 1  | 1.45E-11 | 34  | 6.8   | trhde                     | Signaling     |
| DMRNW_015095250.1:10301  | NW_015095250.1 | 10301  | 11800  | 1500 | 1  | 3.34E-08 | 57  | 3.8   | atp6ap1                   |               |
| DMRNW_015095250.1:192301 | NW_015095250.1 | 192301 | 192600 | 300  | 1  | 1.60E-09 | 5   | 1.667 | vps13d                    |               |
| DMRNW_015095250.1:198201 | NW_015095250.1 | 198201 | 198400 | 200  | 2  | 6.13E-12 | 1   | 0.5   | vps13d                    |               |
| DMRNW_015095254.1:260301 | NW_015095254.1 | 260301 | 261200 | 900  | 1  | 2.97E-08 | 27  | 3     | efr3a                     | Development   |
| DMRNW_015095254.1:264201 | NW_015095254.1 | 264201 | 264400 | 200  | 2  | 2.33E-08 | 12  | 6     | efr3a                     | Development   |
| DMRNW_015095257.1:252101 | NW_015095257.1 | 252101 | 252700 | 600  | 1  | 1.29E-11 | 4   | 0.667 | LOC106925111              |               |
| DMRNW_015095279.1:141101 | NW_015095279.1 | 141101 | 142300 | 1200 | 1  | 5.54E-08 | 35  | 2.917 | LOC106925357              |               |
| DMRNW_015095283.1:81701  | NW_015095283.1 | 81701  | 82600  | 900  | 1  | 2.91E-10 | 8   | 0.889 | LOC106925418              |               |
| DMRNW_015095291.1:234601 | NW_015095291.1 | 234601 | 236500 | 1900 | 1  | 3.91E-11 | 36  | 1.895 | LOC106925501              |               |
| DMRNW_015095294.1:184401 | NW_015095294.1 | 184401 | 185200 | 800  | 4  | 7.81E-17 | 24  | 3     | LOC106925544              |               |
| DMRNW_015095298.1:226201 | NW_015095298.1 | 226201 | 226700 | 500  | 2  | 9.63E-12 | 3   | 0.6   | LOC106925584              |               |
| DMRNW_015095300.1:23001  | NW_015095300.1 | 23001  | 24400  | 1400 | 1  | 1.36E-09 | 26  | 1.857 |                           |               |
| DMRNW_015095300.1:146001 | NW_015095300.1 | 146001 | 148200 | 2200 | 3  | 1.06E-13 | 53  | 2.409 | dpy19l3                   | Development   |
| DMRNW_015095300.1:195501 | NW_015095300.1 | 195501 | 196700 | 1200 | 1  | 8.48E-08 | 19  | 1.583 | LOC106925612              |               |
| DMRNW_015095310.1:259801 | NW_015095310.1 | 259801 | 261400 | 1600 | 2  | 5.88E-11 | 12  | 0.75  |                           |               |
| DMRNW_015095315.1:98201  | NW_015095315.1 | 98201  | 100300 | 2100 | 1  | 2.65E-09 | 35  | 1.667 | LOC106925803              |               |
| DMRNW_015095318.1:178101 | NW_015095318.1 | 178101 | 182600 | 4500 | 10 | 2.01E-17 | 149 | 3.311 | sema5b                    |               |
| DMRNW_015095318.1:231601 | NW_015095318.1 | 231601 | 232800 | 1200 | 1  | 2.42E-08 | 22  | 1.833 | pdia5                     | Metabolism    |
| DMRNW_015095319.1:400901 | NW_015095319.1 | 400901 | 403000 | 2100 | 2  | 2.36E-09 | 106 | 5.048 | nol6;LOC106925866         | Transcription |
| DMRNW_015095326.1:66801  | NW_015095326.1 | 66801  | 68000  | 1200 | 1  | 4.47E-08 | 26  | 2.167 | rexo1                     | Transcription |
| DMRNW_015095326.1:174501 | NW_015095326.1 | 174501 | 177900 | 3400 | 6  | 3.78E-12 | 87  | 2.559 |                           |               |
| DMRNW_015095326.1:178901 | NW_015095326.1 | 178901 | 184200 | 5300 | 5  | 2.12E-10 | 124 | 2.34  |                           |               |
| DMRNW_015095331.1:1      | NW_015095331.1 | 1      | 900    | 900  | 2  | 2.16E-09 | 36  | 4     |                           |               |
| DMRNW_015095332.1:214101 | NW_015095332.1 | 214101 | 215100 | 1000 | 1  | 1.24E-08 | 23  | 2.3   | LOC106926021              |               |
| DMRNW_015095335.1:125601 | NW_015095335.1 | 125601 | 127300 | 1700 | 1  | 2.38E-08 | 50  | 2.941 | LOC106926045              |               |
| DMRNW_015095346.1:211401 | NW_015095346.1 | 211401 | 212400 | 1000 | 1  | 8.60E-11 | 53  | 5.3   | agmo                      | Metabolism    |
| DMRNW_015095346.1:229901 | NW_015095346.1 | 229901 | 230800 | 900  | 1  | 5.89E-09 | 37  | 4.111 | agmo                      | Metabolism    |
| DMRNW_015095352.1:128601 | NW_015095352.1 | 128601 | 130200 | 1600 | 3  | 1.71E-15 | 36  | 2.25  | LOC106926252              |               |
| DMRNW_015095353.1:208601 | NW_015095353.1 | 208601 | 209300 | 700  | 2  | 7.84E-12 | 17  | 2.429 | ttl10                     |               |
| DMRNW_015095356.1:111001 | NW_015095356.1 | 111001 | 112400 | 1400 | 3  | 1.75E-10 | 59  | 4.214 |                           |               |
| DMRNW_015095356.1:117101 | NW_015095356.1 | 117101 | 119400 | 2300 | 2  | 2.91E-09 | 54  | 2.348 | LOC106926305              |               |
| DMRNW_015095366.1:74601  | NW_015095366.1 | 74601  | 75700  | 1100 | 1  | 9.07E-08 | 46  | 4.182 |                           |               |
| DMRNW_015095367.1:390801 | NW_015095367.1 | 390801 | 392749 | 1949 | 7  | 5.59E-14 | 37  | 1.898 |                           |               |
| DMRNW_015095373.1:41401  | NW_015095373.1 | 41401  | 42200  | 800  | 2  | 1.72E-09 | 25  | 3.125 |                           |               |
| DMRNW_015095375.1:1      | NW_015095375.1 | 1      | 400    | 400  | 1  | 6.25E-08 | 9   | 2.25  |                           |               |
| DMRNW_015095375.1:132401 | NW_015095375.1 | 132401 | 137500 | 5100 | 1  | 8.37E-08 | 100 | 1.961 |                           |               |
| DMRNW_015095375.1:171501 | NW_015095375.1 | 171501 | 172200 | 700  | 1  | 8.19E-08 | 23  | 3.286 |                           |               |
| DMRNW_015095383.1:234101 | NW_015095383.1 | 234101 | 234700 | 600  | 2  | 1.94E-10 | 25  | 4.167 |                           |               |
| DMRNW_015095396.1:272101 | NW_015095396.1 | 272101 | 275400 | 3300 | 3  | 1.22E-09 | 49  | 1.485 |                           |               |
| DMRNW_015095396.1:335601 | NW_015095396.1 | 335601 | 337400 | 1800 | 6  | 5.52E-13 | 70  | 3.889 | barh1                     | Transcription |
| DMRNW_015095400.1:137801 | NW_015095400.1 | 137801 | 138700 | 900  | 2  | 2.30E-10 | 28  | 3.111 | LOC106926761;parm1        |               |
| DMRNW_015095401.1:224101 | NW_015095401.1 | 224101 | 228300 | 4200 | 1  | 8.34E-08 | 137 | 3.262 |                           |               |
| DMRNW_015095413.1:148801 | NW_015095413.1 | 148801 | 149300 | 500  | 2  | 6.65E-20 | 8   | 1.6   |                           |               |
| DMRNW_015095414.1:60501  | NW_015095414.1 | 60501  | 60900  | 400  | 1  | 6.04E-10 | 4   | 1     |                           |               |
| DMRNW_015095426.1:53401  | NW_015095426.1 | 53401  | 58800  | 5400 | 1  | 1.91E-08 | 214 | 3.963 | nadk2                     |               |
| DMRNW_015095426.1:90001  | NW_015095426.1 | 90001  | 90400  | 400  | 1  | 4.46E-09 | 9   | 2.25  | sptan1                    |               |
| DMRNW_015095426.1:126801 | NW_015095426.1 | 126801 | 127200 | 400  | 2  | 2.16E-09 | 46  | 11.5  | LOC106927058              |               |
| DMRNW_015095428.1:206401 | NW_015095428.1 | 206401 | 208200 | 1800 | 1  | 9.90E-08 | 57  | 3.167 | LOC106927079              |               |
| DMRNW_015095432.1:27001  | NW_015095432.1 | 27001  | 27400  | 400  | 1  | 2.38E-09 | 4   | 1     | LOC106927110              |               |
| DMRNW_015095434.1:34801  | NW_015095434.1 | 34801  | 37900  | 3100 | 2  | 1.19E-09 | 62  | 2     | LOC106927141              |               |
| DMRNW_015095437.1:34601  | NW_015095437.1 | 34601  | 35100  | 500  | 2  | 4.20E-12 | 12  | 2.4   | ell2                      | Transcription |
| DMRNW_015095437.1:119901 | NW_015095437.1 | 119901 | 124800 | 4900 | 3  | 8.36E-13 | 134 | 2.735 | LOC106927194              |               |
| DMRNW_015095442.1:47201  | NW_015095442.1 | 47201  | 48500  | 1300 | 1  | 2.13E-13 | 10  | 0.769 |                           |               |
| DMRNW_015095442.1:54301  | NW_015095442.1 | 54301  | 55800  | 1500 | 11 | 4.84E-15 | 15  | 1     |                           |               |
| DMRNW_015095453.1:211501 | NW_015095453.1 | 211501 | 212100 | 600  | 1  | 2.68E-09 | 32  | 5.333 |                           |               |
| DMRNW_015095454.1:182901 | NW_015095454.1 | 182901 | 185300 | 2400 | 1  | 1.61E-09 | 33  | 1.375 | LOC106927372              |               |
| DMRNW_015095455.1:176201 | NW_015095455.1 | 176201 | 177500 | 1300 | 1  | 1.96E-14 | 20  | 1.538 | LOC106927377;LOC106927379 |               |
| DMRNW_015095457.1:286101 | NW_015095457.1 | 286101 | 288600 | 2500 | 2  | 2.14E-09 | 83  | 3.32  | slc15a4                   | Metabolism    |
| DMRNW_015095462.1:222501 | NW_015095462.1 | 222501 | 223800 | 1300 | 1  | 2.75E-10 | 34  | 2.615 | cyth1                     | Signaling     |
| DMRNW_015095464.1:12801  | NW_015095464.1 | 12801  | 14900  | 2100 | 2  | 8.30E-24 | 107 | 5.095 | wdr75                     | Unknown       |
| DMRNW_015095464.1:91101  | NW_015095464.1 | 91101  | 93200  | 2100 | 2  | 1.17E-16 | 68  | 3.238 | slc35f5                   |               |
| DMRNW_015095466.1:8501   | NW_015095466.1 | 8501   | 12500  | 4000 | 1  | 3.43E-15 | 86  | 2.15  | LOC106927541              |               |
| DMRNW_015095467.1:199601 | NW_015095467.1 | 199601 | 200800 | 1200 | 1  | 4.36E-08 | 13  | 1.083 | fbxo31;LOC106927561       |               |
| DMRNW_015095470.1:102201 | NW_015095470.1 | 102201 | 103600 | 1400 | 1  | 3.86E-11 | 31  | 2.214 | LOC106927600              |               |
| DMRNW_015095471.1:167601 | NW_015095471.1 | 167601 | 170300 | 2700 | 4  | 3.82E-24 | 27  | 1     |                           |               |
| DMRNW_015095471.1:238001 | NW_015095471.1 | 238001 | 240100 | 2100 | 1  | 4.45E-10 | 74  | 3.524 |                           |               |
| DMRNW_015095473.1:132201 | NW_015095473.1 | 132201 | 133800 | 1600 | 1  | 3.18E-09 | 46  | 2.875 |                           |               |
| DMRNW_015095473.1:137101 | NW_015095473.1 | 137101 | 138600 | 1500 | 1  | 8.62E-08 | 40  | 2.667 |                           |               |
| DMRNW_015095473.1:182001 | NW_015095473.1 | 182001 | 182300 | 300  | 1  | 8.12E-09 | 3   | 1     | LOC106927638              |               |

|                          |                |        |          |      |    |          |     |       |                           |               |
|--------------------------|----------------|--------|----------|------|----|----------|-----|-------|---------------------------|---------------|
| DMRNW_015095474.1:276001 | NW_015095474.1 | 276001 | 277500   | 1500 | 2  | 6.40E-16 | 57  | 3.8   |                           |               |
| DMRNW_015095474.1:299601 | NW_015095474.1 | 299601 | 300400   | 800  | 1  | 5.02E-08 | 38  | 4.75  |                           |               |
| DMRNW_015095474.1:315201 | NW_015095474.1 | 315201 | 318800   | 3600 | 9  | 1.80E-27 | 99  | 2.75  | LOC106927653              |               |
| DMRNW_015095474.1:320001 | NW_015095474.1 | 320001 | 320400   | 400  | 1  | 8.68E-09 | 27  | 6.75  | LOC106927653              |               |
| DMRNW_015095476.1:57901  | NW_015095476.1 | 57901  | 65300    | 7400 | 2  | 1.02E-08 | 174 | 2.351 |                           |               |
| DMRNW_015095477.1:39201  | NW_015095477.1 | 39201  | 41300    | 2100 | 3  | 3.32E-15 | 35  | 1.667 | LOC106927690              |               |
| DMRNW_015095477.1:48501  | NW_015095477.1 | 48501  | 49200    | 700  | 1  | 1.28E-08 | 18  | 2.571 | LOC106927691              |               |
| DMRNW_015095486.1:108301 | NW_015095486.1 | 108301 | 110400   | 2100 | 1  | 6.62E-08 | 45  | 2.143 | nxn                       | Signaling     |
| DMRNW_015095491.1:32401  | NW_015095491.1 | 32401  | 32700    | 300  | 2  | 9.11E-12 | 9   | 3     | ncor2                     | Transcription |
| DMRNW_015095491.1:117001 | NW_015095491.1 | 117001 | 117600   | 600  | 1  | 3.68E-08 | 39  | 6.5   | LOC106927878              |               |
| DMRNW_015095494.1:209601 | NW_015095494.1 | 209601 | 215600   | 6000 | 1  | 9.99E-08 | 100 | 1.667 |                           |               |
| DMRNW_015095496.1:40401  | NW_015095496.1 | 40401  | 42400    | 2000 | 1  | 6.58E-08 | 71  | 3.55  | atn1                      |               |
| DMRNW_015095500.1:48801  | NW_015095500.1 | 48801  | 50000    | 1200 | 1  | 7.40E-08 | 40  | 3.333 | LOC106927974              |               |
| DMRNW_015095503.1:172101 | NW_015095503.1 | 172101 | 174300   | 2200 | 4  | 1.33E-11 | 71  | 3.227 |                           |               |
| DMRNW_015095516.1:43101  | NW_015095516.1 | 43101  | 43700    | 600  | 3  | 5.18E-15 | 7   | 1.167 | LOC106928128              |               |
| DMRNW_015095517.1:43601  | NW_015095517.1 | 43601  | 43900    | 300  | 1  | 2.12E-13 | 0   | 0     | rasal2                    | Signaling     |
| DMRNW_015095519.1:36401  | NW_015095519.1 | 36401  | 37500    | 1100 | 1  | 1.02E-08 | 14  | 1.273 | LOC106928186              |               |
| DMRNW_015095536.1:187901 | NW_015095536.1 | 187901 | 188200   | 300  | 1  | 3.71E-09 | 0   | 0     | LOC106928401              |               |
| DMRNW_015095536.1:300201 | NW_015095536.1 | 300201 | 301100   | 900  | 1  | 8.22E-08 | 36  | 4     | LOC106928398              |               |
| DMRNW_015095539.1:6901   | NW_015095539.1 | 6901   | 9500     | 2600 | 1  | 7.44E-08 | 69  | 2.654 | LOC106928458              |               |
| DMRNW_015095541.1:62101  | NW_015095541.1 | 62101  | 63500    | 1400 | 2  | 4.68E-12 | 34  | 2.429 |                           |               |
| DMRNW_015095544.1:118701 | NW_015095544.1 | 118701 | 120600   | 1900 | 1  | 1.61E-10 | 57  | 3     | plekho1                   | Signaling     |
| DMRNW_015095544.1:137901 | NW_015095544.1 | 137901 | 138400   | 500  | 1  | 7.46E-12 | 0   | 0     |                           |               |
| DMRNW_015095547.1:46201  | NW_015095547.1 | 46201  | 49600    | 3400 | 1  | 7.38E-08 | 219 | 6.441 | LOC106928574;LOC106928573 |               |
| DMRNW_015095547.1:171501 | NW_015095547.1 | 171501 | 175700   | 4200 | 2  | 3.22E-14 | 146 | 3.476 | LOC106928576              |               |
| DMRNW_015095550.1:215501 | NW_015095550.1 | 215501 | 217100   | 1600 | 1  | 1.54E-09 | 56  | 3.5   |                           |               |
| DMRNW_015095566.1:178701 | NW_015095566.1 | 178701 | 181100   | 2400 | 1  | 1.55E-09 | 71  | 2.958 |                           |               |
| DMRNW_015095568.1:131901 | NW_015095568.1 | 131901 | 134300   | 2400 | 1  | 2.18E-10 | 75  | 3.125 | adcy8                     | Signaling     |
| DMRNW_015095570.1:202501 | NW_015095570.1 | 202501 | 204900   | 2400 | 1  | 3.87E-12 | 44  | 1.833 | LOC106928785              |               |
| DMRNW_015095571.1:289401 | NW_015095571.1 | 289401 | 290300   | 900  | 1  | 2.27E-08 | 10  | 1.111 | LOC106928793              |               |
| DMRNW_015095573.1:167701 | NW_015095573.1 | 167701 | 168000   | 300  | 2  | 6.94E-09 | 4   | 1.333 | LOC106928822              |               |
| DMRNW_015095576.1:323101 | NW_015095576.1 | 323101 | 324000   | 900  | 1  | 2.01E-09 | 12  | 1.333 |                           |               |
| DMRNW_015095583.1:141601 | NW_015095583.1 | 141601 | 143100   | 1500 | 1  | 6.38E-08 | 37  | 2.467 | aff2                      | Transcription |
| DMRNW_015095584.1:13901  | NW_015095584.1 | 13901  | 15500    | 1600 | 2  | 2.52E-13 | 52  | 3.25  |                           |               |
| DMRNW_015095584.1:46201  | NW_015095584.1 | 46201  | 47600    | 1400 | 1  | 9.51E-08 | 12  | 0.857 |                           |               |
| DMRNW_015095590.1:163601 | NW_015095590.1 | 163601 | 165300   | 1700 | 2  | 3.66E-09 | 48  | 2.824 | col11a1                   |               |
| DMRNW_015095596.1:202801 | NW_015095596.1 | 202801 | 205200   | 2400 | 1  | 1.42E-08 | 61  | 2.542 |                           |               |
| DMRNW_015095605.1:4401   | NW_015095605.1 | 4401   | 5000     | 600  | 1  | 1.26E-09 | 23  | 3.833 | LOC106929151              |               |
| DMRNW_015095605.1:11401  | NW_015095605.1 | 11401  | 12400    | 1000 | 1  | 9.80E-17 | 56  | 5.6   | LOC106929151;LOC106929152 |               |
| DMRNW_015095605.1:97901  | NW_015095605.1 | 97901  | 100700   | 2800 | 1  | 3.03E-08 | 120 | 4.286 | LOC106929151              |               |
| DMRNW_015095617.1:286301 | NW_015095617.1 | 286301 | 287800   | 1500 | 1  | 3.27E-08 | 20  | 1.333 | ankrd46                   |               |
| DMRNW_015095617.1:293801 | NW_015095617.1 | 293801 | 294500   | 700  | 4  | 2.26E-14 | 17  | 2.429 | ankrd46                   |               |
| DMRNW_015095624.1:61101  | NW_015095624.1 | 61101  | 68100    | 7000 | 1  | 4.30E-09 | 328 | 4.686 | setd5                     |               |
| DMRNW_015095625.1:216901 | NW_015095625.1 | 216901 | 219600   | 2700 | 3  | 3.57E-14 | 86  | 3.185 | LOC106929339              |               |
| DMRNW_015095633.1:25001  | NW_015095633.1 | 25001  | 26400    | 1400 | 2  | 4.72E-11 | 28  | 2     |                           |               |
| DMRNW_015095640.1:215401 | NW_015095640.1 | 215401 | 215900   | 500  | 1  | 1.48E-09 | 29  | 5.8   | dcc                       | Receptor      |
| DMRNW_015095640.1:235201 | NW_015095640.1 | 235201 | 239000   | 3800 | 2  | 1.12E-17 | 144 | 3.789 | dcc                       | Receptor      |
| DMRNW_015095645.1:94001  | NW_015095645.1 | 94001  | 95300    | 1300 | 1  | 2.89E-08 | 25  | 1.923 |                           |               |
| DMRNW_015095646.1:34401  | NW_015095646.1 | 34401  | 35200    | 800  | 1  | 6.34E-10 | 43  | 5.375 | fosl2                     | Transcription |
| DMRNW_015095648.1:154501 | NW_015095648.1 | 154501 | 155400   | 900  | 1  | 4.01E-08 | 30  | 3.333 | LOC106929514              |               |
| DMRNW_015095672.1:97901  | NW_015095672.1 | 97901  | 1.00E+05 | 2100 | 3  | 2.19E-10 | 51  | 2.429 | scara5                    | Unknown       |
| DMRNW_015095676.1:324701 | NW_015095676.1 | 324701 | 325500   | 800  | 1  | 2.13E-09 | 29  | 3.625 | LOC106929771              |               |
| DMRNW_015095686.1:83901  | NW_015095686.1 | 83901  | 85500    | 1600 | 1  | 2.06E-10 | 40  | 2.5   | dhx32                     | Transcription |
| DMRNW_015095688.1:120501 | NW_015095688.1 | 120501 | 122400   | 1900 | 1  | 9.99E-08 | 55  | 2.895 |                           |               |
| DMRNW_015095691.1:97601  | NW_015095691.1 | 97601  | 99100    | 1500 | 1  | 1.36E-09 | 53  | 3.533 | telo2                     |               |
| DMRNW_015095691.1:261801 | NW_015095691.1 | 261801 | 265100   | 3300 | 2  | 2.03E-09 | 107 | 3.242 | LOC106929874              |               |
| DMRNW_015095691.1:268101 | NW_015095691.1 | 268101 | 269000   | 900  | 2  | 7.61E-09 | 62  | 6.889 | LOC106929874              |               |
| DMRNW_015095691.1:305801 | NW_015095691.1 | 305801 | 306400   | 600  | 1  | 2.90E-15 | 28  | 4.667 | LOC106929874              |               |
| DMRNW_015095691.1:348101 | NW_015095691.1 | 348101 | 349100   | 1000 | 2  | 1.32E-15 | 22  | 2.2   | LOC106929885              |               |
| DMRNW_015095693.1:139201 | NW_015095693.1 | 139201 | 140200   | 1000 | 5  | 1.20E-17 | 24  | 2.4   |                           |               |
| DMRNW_015095703.1:187901 | NW_015095703.1 | 187901 | 189300   | 1400 | 10 | 1.98E-47 | 31  | 2.214 |                           |               |
| DMRNW_015095703.1:194801 | NW_015095703.1 | 194801 | 195200   | 400  | 3  | 9.72E-12 | 3   | 0.75  |                           |               |
| DMRNW_015095703.1:196401 | NW_015095703.1 | 196401 | 197100   | 700  | 3  | 9.25E-20 | 10  | 1.429 |                           |               |
| DMRNW_015095705.1:18801  | NW_015095705.1 | 18801  | 19600    | 800  | 2  | 3.05E-11 | 41  | 5.125 |                           |               |
| DMRNW_015095705.1:25501  | NW_015095705.1 | 25501  | 26700    | 1200 | 1  | 5.97E-09 | 28  | 2.333 |                           |               |
| DMRNW_015095709.1:169901 | NW_015095709.1 | 169901 | 170700   | 800  | 1  | 2.89E-10 | 14  | 1.75  | zdhhc13                   | Transcription |
| DMRNW_015095710.1:58201  | NW_015095710.1 | 58201  | 60200    | 2000 | 1  | 8.83E-09 | 19  | 0.95  | capn5                     | Proteolysis   |
| DMRNW_015095712.1:142201 | NW_015095712.1 | 142201 | 144600   | 2400 | 2  | 8.43E-10 | 33  | 1.375 | dlgap1                    | Signaling     |
| DMRNW_015095720.1:91901  | NW_015095720.1 | 91901  | 92900    | 1000 | 2  | 8.53E-11 | 39  | 3.9   | LOC106930153              |               |
| DMRNW_015095721.1:21201  | NW_015095721.1 | 21201  | 25000    | 3800 | 1  | 7.11E-09 | 71  | 1.868 | LOC106930177              |               |
| DMRNW_015095723.1:148101 | NW_015095723.1 | 148101 | 149000   | 900  | 2  | 5.31E-10 | 33  | 3.667 | LOC106930182              |               |

|                          |                |        |        |      |    |          |     |       |                           |               |
|--------------------------|----------------|--------|--------|------|----|----------|-----|-------|---------------------------|---------------|
| DMRNW_015095724.1:8301   | NW_015095724.1 | 8301   | 11200  | 2900 | 1  | 8.17E-08 | 105 | 3.621 | LOC106930197              |               |
| DMRNW_015095729.1:801    | NW_015095729.1 | 801    | 1600   | 800  | 1  | 4.93E-08 | 31  | 3.875 |                           |               |
| DMRNW_015095729.1:111301 | NW_015095729.1 | 111301 | 111900 | 600  | 1  | 2.69E-08 | 27  | 4.5   |                           |               |
| DMRNW_015095733.1:120001 | NW_015095733.1 | 120001 | 121100 | 1100 | 2  | 3.16E-11 | 27  | 2.455 |                           |               |
| DMRNW_015095738.1:97301  | NW_015095738.1 | 97301  | 99700  | 2400 | 2  | 5.91E-12 | 71  | 2.958 | LOC106930345              |               |
| DMRNW_015095739.1:36001  | NW_015095739.1 | 36001  | 37700  | 1700 | 1  | 3.37E-08 | 57  | 3.353 | LOC106930351              |               |
| DMRNW_015095745.1:131901 | NW_015095745.1 | 131901 | 133500 | 1600 | 2  | 2.85E-09 | 41  | 2.562 | LOC106930411;LOC106930412 |               |
| DMRNW_015095745.1:165801 | NW_015095745.1 | 165801 | 166000 | 200  | 1  | 6.92E-10 | 11  | 5.5   | socs5                     | Signaling     |
| DMRNW_015095751.1:108101 | NW_015095751.1 | 108101 | 109900 | 1800 | 1  | 8.04E-08 | 56  | 3.111 | efnb1;LOC106930480        | Signaling     |
| DMRNW_015095760.1:157301 | NW_015095760.1 | 157301 | 159300 | 2000 | 1  | 5.59E-12 | 24  | 1.2   |                           |               |
| DMRNW_015095765.1:167701 | NW_015095765.1 | 167701 | 169000 | 1300 | 1  | 1.12E-08 | 15  | 1.154 | tmef2                     | Signaling     |
| DMRNW_015095781.1:74701  | NW_015095781.1 | 74701  | 76300  | 1600 | 2  | 1.39E-13 | 49  | 3.062 |                           |               |
| DMRNW_015095784.1:3301   | NW_015095784.1 | 3301   | 4900   | 1600 | 1  | 1.55E-08 | 37  | 2.312 |                           |               |
| DMRNW_015095784.1:17701  | NW_015095784.1 | 17701  | 23700  | 6000 | 1  | 2.95E-17 | 276 | 4.6   | LOC106930702;LOC106930701 |               |
| DMRNW_015095784.1:25801  | NW_015095784.1 | 25801  | 26400  | 600  | 1  | 9.47E-08 | 23  | 3.833 | LOC106930702              |               |
| DMRNW_015095786.1:156401 | NW_015095786.1 | 156401 | 156800 | 400  | 1  | 3.73E-09 | 8   | 2     | tacc1                     | Unknown       |
| DMRNW_015095790.1:194201 | NW_015095790.1 | 194201 | 195700 | 1500 | 2  | 3.67E-10 | 39  | 2.6   | ryr3;aven                 | Receptor      |
| DMRNW_015095790.1:305201 | NW_015095790.1 | 305201 | 305500 | 300  | 1  | 2.17E-09 | 4   | 1.333 |                           |               |
| DMRNW_015095796.1:127101 | NW_015095796.1 | 127101 | 130200 | 3100 | 2  | 2.53E-10 | 61  | 1.968 |                           |               |
| DMRNW_015095807.1:260801 | NW_015095807.1 | 260801 | 266100 | 5300 | 21 | 3.71E-30 | 145 | 2.736 |                           |               |
| DMRNW_015095810.1:14201  | NW_015095810.1 | 14201  | 18200  | 4000 | 5  | 1.03E-18 | 117 | 2.925 | LOC106930863              |               |
| DMRNW_015095824.1:14801  | NW_015095824.1 | 14801  | 16900  | 2100 | 4  | 7.86E-11 | 89  | 4.238 | LOC106930984              |               |
| DMRNW_015095828.1:78101  | NW_015095828.1 | 78101  | 79300  | 1200 | 9  | 5.12E-16 | 19  | 1.583 |                           |               |
| DMRNW_015095848.1:29501  | NW_015095848.1 | 29501  | 29900  | 400  | 1  | 2.83E-08 | 6   | 1.5   |                           |               |
| DMRNW_015095867.1:162101 | NW_015095867.1 | 162101 | 162400 | 300  | 1  | 4.20E-08 | 6   | 2     | dok7                      |               |
| DMRNW_015095881.1:35801  | NW_015095881.1 | 35801  | 36300  | 500  | 2  | 6.47E-16 | 10  | 2     | LOC106931474              |               |
| DMRNW_015095882.1:185401 | NW_015095882.1 | 185401 | 186600 | 1200 | 1  | 8.47E-09 | 36  | 3     | otud5                     |               |
| DMRNW_015095886.1:81101  | NW_015095886.1 | 81101  | 85600  | 4500 | 1  | 8.94E-08 | 186 | 4.133 | LOC106931521;LOC106931522 |               |
| DMRNW_015095888.1:71101  | NW_015095888.1 | 71101  | 73000  | 1900 | 7  | 1.29E-14 | 77  | 4.053 | gpr149                    |               |
| DMRNW_015095888.1:124901 | NW_015095888.1 | 124901 | 128000 | 3100 | 1  | 7.73E-13 | 85  | 2.742 | dhx36                     | Transcription |
| DMRNW_015095890.1:138001 | NW_015095890.1 | 138001 | 142600 | 4600 | 1  | 7.08E-09 | 166 | 3.609 | LOC106931550              |               |
| DMRNW_015095894.1:146701 | NW_015095894.1 | 146701 | 147300 | 600  | 1  | 2.89E-10 | 16  | 2.667 | LOC106931560              |               |
| DMRNW_015095919.1:162601 | NW_015095919.1 | 162601 | 163500 | 900  | 1  | 9.30E-08 | 21  | 2.333 |                           |               |
| DMRNW_015095923.1:72301  | NW_015095923.1 | 72301  | 73600  | 1300 | 3  | 1.73E-09 | 64  | 4.923 | LOC106931792              |               |
| DMRNW_015095933.1:113401 | NW_015095933.1 | 113401 | 114500 | 1100 | 1  | 8.51E-09 | 36  | 3.273 | ahdc1                     |               |
| DMRNW_015095941.1:150701 | NW_015095941.1 | 150701 | 152100 | 1400 | 1  | 7.46E-08 | 23  | 1.643 |                           |               |
| DMRNW_015095941.1:268501 | NW_015095941.1 | 268501 | 269400 | 900  | 1  | 7.69E-08 | 54  | 6     | larp1                     |               |
| DMRNW_015095952.1:104001 | NW_015095952.1 | 104001 | 106200 | 2200 | 1  | 5.59E-08 | 57  | 2.591 | nop9                      |               |
| DMRNW_015095958.1:127301 | NW_015095958.1 | 127301 | 127600 | 300  | 1  | 2.61E-09 | 7   | 2.333 | LOC106932059              |               |
| DMRNW_015095971.1:65301  | NW_015095971.1 | 65301  | 66300  | 1000 | 1  | 7.82E-08 | 32  | 3.2   | LOC106932146              |               |
| DMRNW_015095975.1:48301  | NW_015095975.1 | 48301  | 50100  | 1800 | 5  | 1.63E-23 | 41  | 2.278 | atrn                      | Signaling     |
| DMRNW_015095976.1:111801 | NW_015095976.1 | 111801 | 116400 | 4600 | 2  | 3.39E-08 | 191 | 4.152 | nol4l                     |               |
| DMRNW_015095982.1:14501  | NW_015095982.1 | 14501  | 16000  | 1500 | 1  | 9.45E-08 | 28  | 1.867 |                           |               |
| DMRNW_015095982.1:122701 | NW_015095982.1 | 122701 | 123100 | 400  | 1  | 5.35E-09 | 8   | 2     | LOC106932241              |               |
| DMRNW_015095993.1:125801 | NW_015095993.1 | 125801 | 126500 | 700  | 1  | 8.46E-08 | 60  | 8.571 | LOC106932323              |               |
| DMRNW_015095995.1:33801  | NW_015095995.1 | 33801  | 35900  | 2100 | 1  | 1.79E-08 | 36  | 1.714 | LOC106932337              |               |
| DMRNW_015095996.1:58201  | NW_015095996.1 | 58201  | 59100  | 900  | 3  | 3.61E-09 | 39  | 4.333 | LOC106932347              |               |
| DMRNW_015096001.1:186201 | NW_015096001.1 | 186201 | 186800 | 600  | 1  | 1.01E-09 | 16  | 2.667 |                           |               |
| DMRNW_015096006.1:152101 | NW_015096006.1 | 152101 | 154000 | 1900 | 1  | 4.11E-08 | 31  | 1.632 |                           |               |
| DMRNW_015096008.1:6901   | NW_015096008.1 | 6901   | 7300   | 400  | 1  | 3.25E-08 | 13  | 3.25  | LOC106932443              |               |
| DMRNW_015096047.1:19001  | NW_015096047.1 | 19001  | 23300  | 4300 | 1  | 3.11E-08 | 123 | 2.86  |                           |               |
| DMRNW_015096047.1:38201  | NW_015096047.1 | 38201  | 39400  | 1200 | 1  | 5.43E-09 | 40  | 3.333 |                           |               |
| DMRNW_015096047.1:246801 | NW_015096047.1 | 246801 | 247900 | 1100 | 2  | 6.67E-14 | 21  | 1.909 |                           |               |
| DMRNW_015096047.1:254501 | NW_015096047.1 | 254501 | 255600 | 1100 | 1  | 1.11E-09 | 42  | 3.818 |                           |               |
| DMRNW_015096050.1:166401 | NW_015096050.1 | 166401 | 168700 | 2300 | 1  | 6.21E-10 | 57  | 2.478 |                           |               |
| DMRNW_015096065.1:36701  | NW_015096065.1 | 36701  | 38400  | 1700 | 2  | 2.13E-10 | 61  | 3.588 |                           |               |
| DMRNW_015096071.1:44801  | NW_015096071.1 | 44801  | 45300  | 500  | 1  | 1.08E-08 | 10  | 2     |                           |               |
| DMRNW_015096075.1:20101  | NW_015096075.1 | 20101  | 20600  | 500  | 1  | 3.32E-10 | 14  | 2.8   | LOC106932972              |               |
| DMRNW_015096075.1:144401 | NW_015096075.1 | 144401 | 144900 | 500  | 1  | 3.22E-08 | 21  | 4.2   |                           |               |
| DMRNW_015096085.1:92901  | NW_015096085.1 | 92901  | 93600  | 700  | 2  | 7.15E-13 | 6   | 0.857 |                           |               |
| DMRNW_015096086.1:58701  | NW_015096086.1 | 58701  | 59500  | 800  | 1  | 3.01E-09 | 17  | 2.125 |                           |               |
| DMRNW_015096091.1:43001  | NW_015096091.1 | 43001  | 45400  | 2400 | 1  | 2.09E-10 | 27  | 1.125 | shtn1;LOC106933070        |               |
| DMRNW_015096092.1:207201 | NW_015096092.1 | 207201 | 208900 | 1700 | 1  | 5.63E-11 | 52  | 3.059 |                           |               |
| DMRNW_015096096.1:53301  | NW_015096096.1 | 53301  | 55100  | 1800 | 3  | 1.83E-14 | 64  | 3.556 | LOC106933142              |               |
| DMRNW_015096097.1:601    | NW_015096097.1 | 601    | 2400   | 1800 | 2  | 4.39E-14 | 37  | 2.056 | LOC106933152              |               |
| DMRNW_015096100.1:274001 | NW_015096100.1 | 274001 | 275800 | 1800 | 1  | 5.02E-08 | 14  | 0.778 |                           |               |
| DMRNW_015096103.1:109001 | NW_015096103.1 | 109001 | 110200 | 1200 | 1  | 2.83E-08 | 25  | 2.083 | LOC106933189              |               |
| DMRNW_015096115.1:99201  | NW_015096115.1 | 99201  | 99400  | 200  | 1  | 1.55E-08 | 1   | 0.5   | LOC106933294              |               |
| DMRNW_015096130.1:57101  | NW_015096130.1 | 57101  | 58100  | 1000 | 1  | 5.22E-08 | 21  | 2.1   |                           |               |
| DMRNW_015096143.1:33601  | NW_015096143.1 | 33601  | 35600  | 2000 | 3  | 1.90E-13 | 27  | 1.35  | LOC106933474              |               |
| DMRNW_015096146.1:29301  | NW_015096146.1 | 29301  | 30800  | 1500 | 1  | 8.07E-08 | 35  | 2.333 |                           |               |

|                          |                |        |          |      |   |          |     |       |                           |                      |
|--------------------------|----------------|--------|----------|------|---|----------|-----|-------|---------------------------|----------------------|
| DMRNW_015096147.1:14801  | NW_015096147.1 | 14801  | 19800    | 5000 | 2 | 2.66E-11 | 96  | 1.92  | LOC106933487              |                      |
| DMRNW_015096147.1:31801  | NW_015096147.1 | 31801  | 32400    | 600  | 1 | 4.47E-08 | 24  | 4     |                           |                      |
| DMRNW_015096147.1:41901  | NW_015096147.1 | 41901  | 42500    | 600  | 2 | 1.74E-13 | 16  | 2.667 |                           |                      |
| DMRNW_015096170.1:51501  | NW_015096170.1 | 51501  | 53700    | 2200 | 1 | 4.05E-08 | 73  | 3.318 |                           |                      |
| DMRNW_015096170.1:69001  | NW_015096170.1 | 69001  | 71300    | 2300 | 1 | 6.52E-08 | 42  | 1.826 | LOC106933647              |                      |
| DMRNW_015096170.1:99601  | NW_015096170.1 | 99601  | 1.00E+05 | 400  | 1 | 3.93E-13 | 2   | 0.5   | LOC106933647              |                      |
| DMRNW_015096170.1:220801 | NW_015096170.1 | 220801 | 222400   | 1600 | 1 | 4.93E-08 | 51  | 3.188 | itpr3                     |                      |
| DMRNW_015096170.1:225601 | NW_015096170.1 | 225601 | 229600   | 4000 | 2 | 9.98E-13 | 197 | 4.925 | itpr3                     |                      |
| DMRNW_015096170.1:234701 | NW_015096170.1 | 234701 | 236000   | 1300 | 3 | 3.91E-10 | 117 | 9     | itpr3                     |                      |
| DMRNW_015096173.1:135401 | NW_015096173.1 | 135401 | 136500   | 1100 | 3 | 2.52E-16 | 26  | 2.364 |                           |                      |
| DMRNW_015096176.1:1      | NW_015096176.1 | 1      | 1100     | 1100 | 1 | 6.86E-09 | 17  | 1.545 |                           |                      |
| DMRNW_015096177.1:98101  | NW_015096177.1 | 98101  | 99800    | 1700 | 2 | 2.66E-11 | 41  | 2.412 | LOC106933692;LOC106933695 |                      |
| DMRNW_015096177.1:102101 | NW_015096177.1 | 102101 | 103100   | 1000 | 1 | 7.56E-10 | 27  | 2.7   | LOC106933692              |                      |
| DMRNW_015096177.1:139401 | NW_015096177.1 | 139401 | 141900   | 2500 | 1 | 4.67E-09 | 91  | 3.64  | LOC106933689              |                      |
| DMRNW_015096180.1:20201  | NW_015096180.1 | 20201  | 23500    | 3300 | 2 | 2.76E-12 | 65  | 1.97  | cntr2                     | Cytoskeleton         |
| DMRNW_015096185.1:57401  | NW_015096185.1 | 57401  | 58100    | 700  | 1 | 9.25E-09 | 22  | 3.143 | LOC106933726              |                      |
| DMRNW_015096191.1:36001  | NW_015096191.1 | 36001  | 36900    | 900  | 2 | 7.68E-11 | 33  | 3.667 | lama4                     | Extracellular Matrix |
| DMRNW_015096192.1:132101 | NW_015096192.1 | 132101 | 132500   | 400  | 1 | 2.79E-08 | 22  | 5.5   |                           |                      |
| DMRNW_015096192.1:134901 | NW_015096192.1 | 134901 | 135600   | 700  | 3 | 1.92E-14 | 27  | 3.857 |                           |                      |
| DMRNW_015096201.1:11901  | NW_015096201.1 | 11901  | 13200    | 1300 | 2 | 2.06E-11 | 25  | 1.923 | LOC106933848              |                      |
| DMRNW_015096204.1:33301  | NW_015096204.1 | 33301  | 34600    | 1300 | 4 | 2.25E-10 | 43  | 3.308 |                           |                      |
| DMRNW_015096205.1:101901 | NW_015096205.1 | 101901 | 103100   | 1200 | 1 | 5.03E-09 | 58  | 4.833 | rnf152                    | Metabolism           |
| DMRNW_015096209.1:102001 | NW_015096209.1 | 102001 | 103100   | 1100 | 1 | 3.62E-08 | 20  | 1.818 |                           |                      |
| DMRNW_015096220.1:70301  | NW_015096220.1 | 70301  | 70900    | 600  | 1 | 4.55E-09 | 16  | 2.667 | ngfr                      | Receptor             |
| DMRNW_015096230.1:119401 | NW_015096230.1 | 119401 | 121000   | 1600 | 1 | 1.35E-16 | 77  | 4.812 | LOC106934044              |                      |
| DMRNW_015096231.1:35501  | NW_015096231.1 | 35501  | 36500    | 1000 | 3 | 1.58E-10 | 3   | 0.3   |                           |                      |
| DMRNW_015096231.1:93801  | NW_015096231.1 | 93801  | 98500    | 4700 | 1 | 7.67E-19 | 214 | 4.553 | LOC106934054              |                      |
| DMRNW_015096239.1:43201  | NW_015096239.1 | 43201  | 44900    | 1700 | 2 | 9.11E-10 | 58  | 3.412 | mtor                      | Signaling            |
| DMRNW_015096247.1:28601  | NW_015096247.1 | 28601  | 37000    | 8400 | 1 | 6.16E-08 | 173 | 2.06  | LOC106934173;slc35e2b     | Transport            |
| DMRNW_015096256.1:78301  | NW_015096256.1 | 78301  | 79000    | 700  | 1 | 2.06E-10 | 15  | 2.143 | LOC106934236;LOC106934237 |                      |
| DMRNW_015096257.1:94901  | NW_015096257.1 | 94901  | 95900    | 1000 | 1 | 4.39E-08 | 78  | 7.8   | LOC106934240              |                      |
| DMRNW_015096258.1:134601 | NW_015096258.1 | 134601 | 134862   | 262  | 2 | 7.10E-13 | 10  | 3.817 |                           |                      |
| DMRNW_015096263.1:200801 | NW_015096263.1 | 200801 | 204200   | 3400 | 1 | 5.26E-08 | 95  | 2.794 |                           |                      |
| DMRNW_015096287.1:113301 | NW_015096287.1 | 113301 | 113700   | 400  | 1 | 3.71E-08 | 8   | 2     |                           |                      |
| DMRNW_015096291.1:115301 | NW_015096291.1 | 115301 | 119400   | 4100 | 1 | 4.78E-08 | 145 | 3.537 | cdk17                     | Signaling            |
| DMRNW_015096292.1:1      | NW_015096292.1 | 1      | 2500     | 2500 | 1 | 8.34E-08 | 83  | 3.32  | LOC106903313              |                      |
| DMRNW_015096300.1:72801  | NW_015096300.1 | 72801  | 73300    | 500  | 2 | 3.41E-09 | 21  | 4.2   |                           |                      |
| DMRNW_015096301.1:23001  | NW_015096301.1 | 23001  | 24900    | 1900 | 1 | 2.48E-09 | 42  | 2.211 | LOC106903387              |                      |
| DMRNW_015096302.1:301    | NW_015096302.1 | 301    | 3500     | 3200 | 2 | 2.09E-13 | 155 | 4.844 |                           |                      |
| DMRNW_015096302.1:14001  | NW_015096302.1 | 14001  | 18900    | 4900 | 1 | 2.81E-08 | 341 | 6.959 |                           |                      |
| DMRNW_015096302.1:54101  | NW_015096302.1 | 54101  | 57000    | 2900 | 1 | 1.21E-09 | 169 | 5.828 |                           |                      |
| DMRNW_015096303.1:95301  | NW_015096303.1 | 95301  | 95700    | 400  | 1 | 5.64E-09 | 35  | 8.75  | LOC106903390;LOC106903394 |                      |
| DMRNW_015096310.1:87001  | NW_015096310.1 | 87001  | 87300    | 300  | 1 | 2.29E-10 | 1   | 0.333 | LOC106903428              |                      |
| DMRNW_015096318.1:31601  | NW_015096318.1 | 31601  | 32400    | 800  | 1 | 3.24E-08 | 32  | 4     | hctcd1                    | Metabolism           |
| DMRNW_015096319.1:20001  | NW_015096319.1 | 20001  | 20600    | 600  | 1 | 7.67E-08 | 29  | 4.833 | LOC106903473              |                      |
| DMRNW_015096328.1:71601  | NW_015096328.1 | 71601  | 74300    | 2700 | 1 | 7.35E-08 | 76  | 2.815 | LOC106903514              |                      |
| DMRNW_015096329.1:7601   | NW_015096329.1 | 7601   | 8400     | 800  | 1 | 8.98E-08 | 8   | 1     |                           |                      |
| DMRNW_015096335.1:275901 | NW_015096335.1 | 275901 | 276600   | 700  | 1 | 1.95E-08 | 35  | 5     | LOC106903567              |                      |
| DMRNW_015096338.1:46701  | NW_015096338.1 | 46701  | 47400    | 700  | 1 | 2.64E-09 | 34  | 4.857 | tnk2                      | Signaling            |
| DMRNW_015096353.1:36301  | NW_015096353.1 | 36301  | 36700    | 400  | 2 | 2.55E-15 | 1   | 0.25  | LOC106903720              |                      |
| DMRNW_015096353.1:62701  | NW_015096353.1 | 62701  | 64300    | 1600 | 1 | 1.59E-08 | 28  | 1.75  | LOC106903720              |                      |
| DMRNW_015096355.1:111701 | NW_015096355.1 | 111701 | 112800   | 1100 | 3 | 4.38E-12 | 39  | 3.545 | fbn1                      | Development          |
| DMRNW_015096360.1:84401  | NW_015096360.1 | 84401  | 90500    | 6100 | 1 | 6.94E-08 | 166 | 2.721 | LOC106903780;LOC106903782 |                      |
| DMRNW_015096363.1:98101  | NW_015096363.1 | 98101  | 99300    | 1200 | 1 | 1.28E-12 | 61  | 5.083 | LOC106903798              |                      |
| DMRNW_015096367.1:87101  | NW_015096367.1 | 87101  | 88900    | 1800 | 1 | 5.66E-10 | 30  | 1.667 | LOC106903823              |                      |
| DMRNW_015096370.1:90001  | NW_015096370.1 | 90001  | 91300    | 1300 | 1 | 7.08E-09 | 26  | 2     | LOC106903842              |                      |
| DMRNW_015096370.1:108601 | NW_015096370.1 | 108601 | 109400   | 800  | 1 | 3.55E-08 | 41  | 5.125 |                           |                      |
| DMRNW_015096372.1:49601  | NW_015096372.1 | 49601  | 50800    | 1200 | 2 | 3.69E-23 | 22  | 1.833 | LOC106903858              |                      |
| DMRNW_015096393.1:701    | NW_015096393.1 | 701    | 900      | 200  | 1 | 1.20E-08 | 16  | 8     |                           |                      |
| DMRNW_015096399.1:42501  | NW_015096399.1 | 42501  | 43900    | 1400 | 1 | 6.30E-09 | 19  | 1.357 | LOC106904022              |                      |
| DMRNW_015096411.1:1      | NW_015096411.1 | 1      | 800      | 800  | 1 | 1.84E-13 | 46  | 5.75  | LOC106904096              |                      |
| DMRNW_015096414.1:41201  | NW_015096414.1 | 41201  | 42000    | 800  | 1 | 7.49E-09 | 20  | 2.5   | LOC106904132              |                      |
| DMRNW_015096414.1:46801  | NW_015096414.1 | 46801  | 47500    | 700  | 4 | 1.97E-16 | 36  | 5.143 | LOC106904132              |                      |
| DMRNW_015096419.1:69501  | NW_015096419.1 | 69501  | 70200    | 700  | 1 | 1.33E-09 | 24  | 3.429 | LOC106904166              |                      |
| DMRNW_015096421.1:82801  | NW_015096421.1 | 82801  | 83400    | 600  | 1 | 7.94E-08 | 8   | 1.333 |                           |                      |
| DMRNW_015096424.1:30701  | NW_015096424.1 | 30701  | 32300    | 1600 | 1 | 8.62E-08 | 52  | 3.25  |                           |                      |
| DMRNW_015096428.1:63401  | NW_015096428.1 | 63401  | 66200    | 2800 | 2 | 1.68E-20 | 48  | 1.714 | LOC106904219;LOC106904222 |                      |
| DMRNW_015096429.1:71401  | NW_015096429.1 | 71401  | 71700    | 300  | 1 | 5.08E-09 | 11  | 3.667 |                           |                      |
| DMRNW_015096438.1:109401 | NW_015096438.1 | 109401 | 111000   | 1600 | 1 | 9.73E-09 | 127 | 7.938 | snx21                     |                      |
| DMRNW_015096440.1:70901  | NW_015096440.1 | 70901  | 71400    | 500  | 1 | 5.25E-08 | 14  | 2.8   | LOC106904300              |                      |
| DMRNW_015096449.1:9901   | NW_015096449.1 | 9901   | 10400    | 500  | 1 | 2.15E-09 | 22  | 4.4   |                           |                      |

|                          |                |        |        |       |    |          |     |       |                                        |               |
|--------------------------|----------------|--------|--------|-------|----|----------|-----|-------|----------------------------------------|---------------|
| DMRNW_015096449.1:15001  | NW_015096449.1 | 15001  | 16400  | 1400  | 4  | 9.20E-33 | 36  | 2.571 |                                        |               |
| DMRNW_015096449.1:19801  | NW_015096449.1 | 19801  | 20600  | 800   | 3  | 3.97E-41 | 39  | 4.875 |                                        |               |
| DMRNW_015096449.1:101401 | NW_015096449.1 | 101401 | 101900 | 500   | 1  | 8.61E-08 | 23  | 4.6   |                                        |               |
| DMRNW_015096468.1:5701   | NW_015096468.1 | 5701   | 7000   | 1300  | 2  | 2.66E-09 | 27  | 2.077 |                                        |               |
| DMRNW_015096471.1:41201  | NW_015096471.1 | 41201  | 42000  | 800   | 2  | 6.90E-12 | 21  | 2.625 |                                        |               |
| DMRNW_015096472.1:55501  | NW_015096472.1 | 55501  | 56300  | 800   | 1  | 6.93E-08 | 35  | 4.375 | LOC106904443                           |               |
| DMRNW_015096475.1:25501  | NW_015096475.1 | 25501  | 26100  | 600   | 1  | 1.04E-08 | 16  | 2.667 | LOC106904461                           |               |
| DMRNW_015096475.1:103001 | NW_015096475.1 | 103001 | 103400 | 400   | 1  | 3.87E-08 | 7   | 1.75  |                                        |               |
| DMRNW_015096475.1:183901 | NW_015096475.1 | 183901 | 185500 | 1600  | 1  | 4.67E-08 | 69  | 4.312 | ppm1e                                  | Signaling     |
| DMRNW_015096476.1:50701  | NW_015096476.1 | 50701  | 53900  | 3200  | 1  | 1.79E-11 | 63  | 1.969 |                                        |               |
| DMRNW_015096484.1:73501  | NW_015096484.1 | 73501  | 74300  | 800   | 1  | 8.90E-09 | 25  | 3.125 |                                        |               |
| DMRNW_015096486.1:92901  | NW_015096486.1 | 92901  | 97200  | 4300  | 28 | 6.37E-15 | 264 | 6.14  |                                        |               |
| DMRNW_015096486.1:103201 | NW_015096486.1 | 103201 | 103500 | 300   | 3  | 8.11E-14 | 25  | 8.333 |                                        |               |
| DMRNW_015096488.1:48001  | NW_015096488.1 | 48001  | 51000  | 3000  | 3  | 1.79E-09 | 50  | 1.667 | LOC106904533                           |               |
| DMRNW_015096488.1:153501 | NW_015096488.1 | 153501 | 154600 | 1100  | 2  | 3.25E-12 | 30  | 2.727 |                                        |               |
| DMRNW_015096492.1:93401  | NW_015096492.1 | 93401  | 99200  | 5800  | 1  | 7.59E-09 | 142 | 2.448 | LOC106904546                           |               |
| DMRNW_015096500.1:60101  | NW_015096500.1 | 60101  | 63000  | 2900  | 1  | 7.94E-09 | 68  | 2.345 | LOC106904606                           |               |
| DMRNW_015096502.1:9001   | NW_015096502.1 | 9001   | 14900  | 5900  | 6  | 2.78E-11 | 127 | 2.153 |                                        |               |
| DMRNW_015096507.1:108801 | NW_015096507.1 | 108801 | 109700 | 900   | 8  | 1.04E-13 | 11  | 1.222 |                                        |               |
| DMRNW_015096507.1:115001 | NW_015096507.1 | 115001 | 116216 | 1216  | 9  | 1.54E-14 | 37  | 3.043 |                                        |               |
| DMRNW_015096516.1:35501  | NW_015096516.1 | 35501  | 36100  | 600   | 1  | 1.37E-11 | 21  | 3.5   | chat                                   | Metabolism    |
| DMRNW_015096533.1:13901  | NW_015096533.1 | 13901  | 15200  | 1300  | 1  | 2.06E-10 | 19  | 1.462 | rpl30                                  | Transcription |
| DMRNW_015096540.1:16301  | NW_015096540.1 | 16301  | 17300  | 1000  | 1  | 1.29E-09 | 44  | 4.4   | LOC106904835                           |               |
| DMRNW_015096545.1:80401  | NW_015096545.1 | 80401  | 80800  | 400   | 1  | 8.14E-09 | 15  | 3.75  |                                        |               |
| DMRNW_015096559.1:83001  | NW_015096559.1 | 83001  | 102400 | 19400 | 5  | 4.71E-10 | 465 | 2.397 | LOC106904946;LOC106904945;LOC106904948 |               |
| DMRNW_015096572.1:55701  | NW_015096572.1 | 55701  | 56500  | 800   | 2  | 7.83E-15 | 26  | 3.25  | LOC106905004;LOC106905006              |               |
| DMRNW_015096580.1:47801  | NW_015096580.1 | 47801  | 48800  | 1000  | 1  | 1.16E-11 | 24  | 2.4   | adam15                                 |               |
| DMRNW_015096590.1:7201   | NW_015096590.1 | 7201   | 7900   | 700   | 2  | 5.92E-11 | 23  | 3.286 | eya2                                   | Development   |
| DMRNW_015096605.1:17201  | NW_015096605.1 | 17201  | 22600  | 5400  | 5  | 2.16E-09 | 120 | 2.222 | LOC106905197                           |               |
| DMRNW_015096606.1:93001  | NW_015096606.1 | 93001  | 94000  | 1000  | 1  | 5.94E-08 | 16  | 1.6   |                                        |               |
| DMRNW_015096617.1:31001  | NW_015096617.1 | 31001  | 35300  | 4300  | 1  | 1.84E-08 | 80  | 1.86  | LOC106905274                           |               |
| DMRNW_015096626.1:85601  | NW_015096626.1 | 85601  | 87400  | 1800  | 2  | 5.93E-13 | 65  | 3.611 |                                        |               |
| DMRNW_015096634.1:104601 | NW_015096634.1 | 104601 | 106000 | 1400  | 4  | 7.60E-10 | 52  | 3.714 |                                        |               |
| DMRNW_015096652.1:76801  | NW_015096652.1 | 76801  | 79600  | 2800  | 10 | 3.42E-19 | 81  | 2.893 |                                        |               |
| DMRNW_015096652.1:151901 | NW_015096652.1 | 151901 | 152100 | 200   | 2  | 1.29E-11 | 3   | 1.5   | LOC106905445                           |               |
| DMRNW_015096655.1:201    | NW_015096655.1 | 201    | 2300   | 2100  | 1  | 6.01E-08 | 48  | 2.286 |                                        |               |
| DMRNW_015096662.1:100101 | NW_015096662.1 | 100101 | 100500 | 400   | 2  | 8.15E-09 | 3   | 0.75  |                                        |               |
| DMRNW_015096722.1:56001  | NW_015096722.1 | 56001  | 57600  | 1600  | 2  | 7.68E-16 | 39  | 2.438 |                                        |               |
| DMRNW_015096722.1:68601  | NW_015096722.1 | 68601  | 69400  | 800   | 7  | 5.30E-24 | 39  | 4.875 |                                        |               |
| DMRNW_015096722.1:74701  | NW_015096722.1 | 74701  | 76700  | 2000  | 1  | 2.02E-08 | 43  | 2.15  |                                        |               |
| DMRNW_015096723.1:48501  | NW_015096723.1 | 48501  | 49500  | 1000  | 1  | 2.86E-08 | 15  | 1.5   |                                        |               |
| DMRNW_015096742.1:75301  | NW_015096742.1 | 75301  | 76200  | 900   | 1  | 2.42E-08 | 45  | 5     | LOC106905869                           |               |
| DMRNW_015096749.1:92101  | NW_015096749.1 | 92101  | 94300  | 2200  | 1  | 8.00E-09 | 91  | 4.136 | LOC106905897                           |               |
| DMRNW_015096752.1:14201  | NW_015096752.1 | 14201  | 15000  | 800   | 1  | 2.28E-08 | 34  | 4.25  |                                        |               |
| DMRNW_015096764.1:65401  | NW_015096764.1 | 65401  | 67000  | 1600  | 1  | 4.65E-09 | 61  | 3.812 | LOC106905958                           |               |
| DMRNW_015096769.1:121701 | NW_015096769.1 | 121701 | 124200 | 2500  | 4  | 4.64E-96 | 49  | 1.96  | LOC106905990                           |               |
| DMRNW_015096771.1:201    | NW_015096771.1 | 201    | 400    | 200   | 1  | 7.09E-08 | 8   | 4     |                                        |               |
| DMRNW_015096774.1:25301  | NW_015096774.1 | 25301  | 27100  | 1800  | 1  | 5.32E-08 | 42  | 2.333 |                                        |               |
| DMRNW_015096775.1:1      | NW_015096775.1 | 1      | 1000   | 1000  | 1  | 3.59E-10 | 17  | 1.7   |                                        |               |
| DMRNW_015096792.1:42001  | NW_015096792.1 | 42001  | 43500  | 1500  | 2  | 4.88E-08 | 24  | 1.6   |                                        |               |
| DMRNW_015096809.1:103101 | NW_015096809.1 | 103101 | 103900 | 800   | 1  | 5.66E-08 | 17  | 2.125 |                                        |               |
| DMRNW_015096810.1:43001  | NW_015096810.1 | 43001  | 45400  | 2400  | 2  | 7.52E-19 | 29  | 1.208 |                                        |               |
| DMRNW_015096824.1:92001  | NW_015096824.1 | 92001  | 92900  | 900   | 1  | 2.17E-14 | 75  | 8.333 |                                        |               |
| DMRNW_015096828.1:1      | NW_015096828.1 | 1      | 600    | 600   | 5  | 3.94E-17 | 5   | 0.833 |                                        |               |
| DMRNW_015096830.1:25001  | NW_015096830.1 | 25001  | 25300  | 300   | 1  | 3.91E-09 | 17  | 5.667 |                                        |               |
| DMRNW_015096830.1:78301  | NW_015096830.1 | 78301  | 78800  | 500   | 1  | 7.10E-12 | 16  | 3.2   |                                        |               |
| DMRNW_015096841.1:37301  | NW_015096841.1 | 37301  | 38700  | 1400  | 1  | 7.68E-09 | 56  | 4     |                                        |               |
| DMRNW_015096841.1:42801  | NW_015096841.1 | 42801  | 43400  | 600   | 1  | 3.66E-11 | 24  | 4     |                                        |               |
| DMRNW_015096868.1:2601   | NW_015096868.1 | 2601   | 2800   | 200   | 1  | 9.62E-08 | 3   | 1.5   |                                        |               |
| DMRNW_015096868.1:33301  | NW_015096868.1 | 33301  | 35100  | 1800  | 1  | 6.20E-43 | 55  | 3.056 |                                        |               |
| DMRNW_015096870.1:84801  | NW_015096870.1 | 84801  | 86300  | 1500  | 1  | 9.72E-08 | 52  | 3.467 | LOC106906450                           |               |
| DMRNW_015096884.1:54701  | NW_015096884.1 | 54701  | 55000  | 300   | 1  | 6.30E-10 | 3   | 1     | LOC106906519                           |               |
| DMRNW_015096896.1:86001  | NW_015096896.1 | 86001  | 91100  | 5100  | 6  | 1.65E-17 | 186 | 3.647 |                                        |               |
| DMRNW_015096897.1:19301  | NW_015096897.1 | 19301  | 25500  | 6200  | 3  | 5.37E-13 | 269 | 4.339 |                                        |               |
| DMRNW_015096914.1:24901  | NW_015096914.1 | 24901  | 25400  | 500   | 1  | 2.99E-08 | 6   | 1.2   | LOC106906650;LOC106906651              |               |
| DMRNW_015096928.1:57301  | NW_015096928.1 | 57301  | 65000  | 7700  | 37 | 2.85E-22 | 244 | 3.169 |                                        |               |
| DMRNW_015096929.1:77701  | NW_015096929.1 | 77701  | 82700  | 5000  | 2  | 5.80E-10 | 125 | 2.5   | LOC106906729                           |               |
| DMRNW_015096941.1:76601  | NW_015096941.1 | 76601  | 77400  | 800   | 1  | 1.06E-21 | 28  | 3.5   | LOC106906795                           |               |
| DMRNW_015096943.1:97401  | NW_015096943.1 | 97401  | 97900  | 500   | 1  | 9.07E-08 | 10  | 2     |                                        |               |
| DMRNW_015096945.1:33501  | NW_015096945.1 | 33501  | 35800  | 2300  | 1  | 3.13E-08 | 49  | 2.13  | lmnb1                                  | Cytoskeleton  |
| DMRNW_015096946.1:15401  | NW_015096946.1 | 15401  | 18200  | 2800  | 4  | 2.04E-12 | 74  | 2.643 | LOC106906828                           |               |

|                          |                |        |        |      |    |          |     |       |                                  |                      |
|--------------------------|----------------|--------|--------|------|----|----------|-----|-------|----------------------------------|----------------------|
| DMRNW_015096951.1:69301  | NW_015096951.1 | 69301  | 70800  | 1500 | 2  | 5.76E-57 | 30  | 2     |                                  |                      |
| DMRNW_015096963.1:56901  | NW_015096963.1 | 56901  | 57800  | 900  | 2  | 6.51E-19 | 19  | 2.111 | nav2                             | Development          |
| DMRNW_015096971.1:38401  | NW_015096971.1 | 38401  | 39500  | 1100 | 4  | 4.41E-12 | 51  | 4.636 | LOC106906924                     |                      |
| DMRNW_015096972.1:34401  | NW_015096972.1 | 34401  | 34600  | 200  | 1  | 2.76E-15 | 0   | 0     |                                  |                      |
| DMRNW_015096978.1:16401  | NW_015096978.1 | 16401  | 16900  | 500  | 2  | 2.38E-13 | 16  | 3.2   |                                  |                      |
| DMRNW_015097011.1:1      | NW_015097011.1 | 1      | 1900   | 1900 | 1  | 9.49E-09 | 50  | 2.632 |                                  |                      |
| DMRNW_015097029.1:71901  | NW_015097029.1 | 71901  | 73800  | 1900 | 2  | 3.00E-18 | 40  | 2.105 |                                  |                      |
| DMRNW_015097054.1:23901  | NW_015097054.1 | 23901  | 24300  | 400  | 1  | 3.12E-08 | 16  | 4     |                                  |                      |
| DMRNW_015097060.1:3401   | NW_015097060.1 | 3401   | 9000   | 5600 | 1  | 9.03E-08 | 177 | 3.161 |                                  |                      |
| DMRNW_015097062.1:42901  | NW_015097062.1 | 42901  | 44300  | 1400 | 1  | 7.35E-08 | 48  | 3.429 | LOC106907298                     |                      |
| DMRNW_015097065.1:45701  | NW_015097065.1 | 45701  | 46900  | 1200 | 2  | 8.25E-26 | 19  | 1.583 |                                  |                      |
| DMRNW_015097070.1:80601  | NW_015097070.1 | 80601  | 81400  | 800  | 4  | 9.21E-14 | 35  | 4.375 | LOC106907324;trnad-guc;trnag-gcc |                      |
| DMRNW_015097070.1:82601  | NW_015097070.1 | 82601  | 86900  | 4300 | 7  | 3.28E-10 | 97  | 2.256 | LOC106907324;trnad-guc;trnag-gcc |                      |
| DMRNW_015097070.1:94201  | NW_015097070.1 | 94201  | 98300  | 4100 | 5  | 6.57E-10 | 159 | 3.878 | trnad-guc;trnag-gcc              |                      |
| DMRNW_015097072.1:32701  | NW_015097072.1 | 32701  | 38000  | 5300 | 7  | 1.70E-11 | 239 | 4.509 | LOC106907338                     |                      |
| DMRNW_015097081.1:11801  | NW_015097081.1 | 11801  | 14100  | 2300 | 1  | 2.74E-08 | 128 | 5.565 | LOC106907365                     |                      |
| DMRNW_015097089.1:15401  | NW_015097089.1 | 15401  | 21800  | 6400 | 3  | 4.29E-10 | 264 | 4.125 | tfap2e                           | Transcription        |
| DMRNW_015097089.1:114101 | NW_015097089.1 | 114101 | 116700 | 2600 | 3  | 1.04E-10 | 66  | 2.538 | LOC106907411;LOC106907412        |                      |
| DMRNW_015097094.1:79501  | NW_015097094.1 | 79501  | 80000  | 500  | 1  | 9.45E-10 | 11  | 2.2   |                                  |                      |
| DMRNW_015097104.1:21901  | NW_015097104.1 | 21901  | 23700  | 1800 | 6  | 5.18E-13 | 57  | 3.167 |                                  |                      |
| DMRNW_015097153.1:75201  | NW_015097153.1 | 75201  | 77400  | 2200 | 1  | 7.48E-12 | 65  | 2.955 |                                  |                      |
| DMRNW_015097155.1:47301  | NW_015097155.1 | 47301  | 50400  | 3100 | 2  | 2.15E-12 | 37  | 1.194 |                                  |                      |
| DMRNW_015097167.1:37201  | NW_015097167.1 | 37201  | 37600  | 400  | 1  | 8.06E-08 | 15  | 3.75  |                                  |                      |
| DMRNW_015097169.1:11201  | NW_015097169.1 | 11201  | 12700  | 1500 | 6  | 3.26E-14 | 33  | 2.2   |                                  |                      |
| DMRNW_015097173.1:14501  | NW_015097173.1 | 14501  | 16200  | 1700 | 1  | 6.22E-08 | 54  | 3.176 | LOC106907795                     |                      |
| DMRNW_015097177.1:35401  | NW_015097177.1 | 35401  | 36600  | 1200 | 2  | 3.73E-12 | 52  | 4.333 | LOC106907817                     |                      |
| DMRNW_015097183.1:74401  | NW_015097183.1 | 74401  | 75400  | 1000 | 1  | 6.92E-12 | 17  | 1.7   |                                  |                      |
| DMRNW_015097185.1:6601   | NW_015097185.1 | 6601   | 10700  | 4100 | 1  | 9.91E-14 | 89  | 2.171 | dcdc2                            | Development          |
| DMRNW_015097187.1:74001  | NW_015097187.1 | 74001  | 74900  | 900  | 2  | 1.36E-08 | 47  | 5.222 |                                  |                      |
| DMRNW_015097191.1:61101  | NW_015097191.1 | 61101  | 61600  | 500  | 1  | 4.05E-12 | 12  | 2.4   |                                  |                      |
| DMRNW_015097195.1:19401  | NW_015097195.1 | 19401  | 24100  | 4700 | 1  | 3.49E-08 | 106 | 2.255 | LOC106907885                     |                      |
| DMRNW_015097195.1:236301 | NW_015097195.1 | 236301 | 238300 | 2000 | 2  | 3.29E-11 | 39  | 1.95  | il34                             | Signaling            |
| DMRNW_015097199.1:66801  | NW_015097199.1 | 66801  | 67400  | 600  | 1  | 2.41E-09 | 24  | 4     |                                  |                      |
| DMRNW_015097203.1:74301  | NW_015097203.1 | 74301  | 75300  | 1000 | 2  | 2.05E-17 | 41  | 4.1   | LOC106907914                     |                      |
| DMRNW_015097221.1:69601  | NW_015097221.1 | 69601  | 71800  | 2200 | 3  | 1.06E-17 | 59  | 2.682 |                                  |                      |
| DMRNW_015097225.1:114701 | NW_015097225.1 | 114701 | 115700 | 1000 | 1  | 2.63E-10 | 8   | 0.8   |                                  |                      |
| DMRNW_015097236.1:85701  | NW_015097236.1 | 85701  | 86800  | 1100 | 1  | 1.74E-08 | 34  | 3.091 | LOC106908068                     |                      |
| DMRNW_015097252.1:67701  | NW_015097252.1 | 67701  | 72700  | 5000 | 5  | 2.85E-17 | 79  | 1.58  |                                  |                      |
| DMRNW_015097254.1:5701   | NW_015097254.1 | 5701   | 7800   | 2100 | 1  | 8.06E-10 | 41  | 1.952 |                                  |                      |
| DMRNW_015097254.1:49401  | NW_015097254.1 | 49401  | 51600  | 2200 | 3  | 3.54E-10 | 49  | 2.227 | LOC106908141                     |                      |
| DMRNW_015097256.1:1      | NW_015097256.1 | 1      | 1700   | 1700 | 4  | 5.59E-09 | 47  | 2.765 |                                  |                      |
| DMRNW_015097294.1:42001  | NW_015097294.1 | 42001  | 42700  | 700  | 3  | 7.83E-39 | 3   | 0.429 | cdh11                            | Extracellular Matrix |
| DMRNW_015097305.1:3101   | NW_015097305.1 | 3101   | 5500   | 2400 | 1  | 6.59E-08 | 33  | 1.375 | LOC106908295                     |                      |
| DMRNW_015097309.1:31001  | NW_015097309.1 | 31001  | 31600  | 600  | 2  | 5.55E-08 | 8   | 1.333 |                                  |                      |
| DMRNW_015097309.1:35001  | NW_015097309.1 | 35001  | 39400  | 4400 | 20 | 3.56E-20 | 150 | 3.409 |                                  |                      |
| DMRNW_015097309.1:44901  | NW_015097309.1 | 44901  | 49600  | 4700 | 1  | 3.53E-10 | 114 | 2.426 | LOC106908309                     |                      |
| DMRNW_015097309.1:54101  | NW_015097309.1 | 54101  | 63600  | 9500 | 2  | 3.32E-08 | 206 | 2.168 |                                  |                      |
| DMRNW_015097309.1:65401  | NW_015097309.1 | 65401  | 68700  | 3300 | 3  | 2.61E-09 | 203 | 6.152 |                                  |                      |
| DMRNW_015097312.1:78401  | NW_015097312.1 | 78401  | 79300  | 900  | 1  | 5.88E-08 | 22  | 2.444 | wdr78                            | Cytoskeleton         |
| DMRNW_015097316.1:2301   | NW_015097316.1 | 2301   | 4800   | 2500 | 3  | 6.49E-12 | 53  | 2.12  |                                  |                      |
| DMRNW_015097322.1:49301  | NW_015097322.1 | 49301  | 50000  | 700  | 2  | 1.05E-10 | 11  | 1.571 | LOC106908370                     |                      |
| DMRNW_015097323.1:64801  | NW_015097323.1 | 64801  | 65400  | 600  | 2  | 1.83E-09 | 25  | 4.167 |                                  |                      |
| DMRNW_015097325.1:3801   | NW_015097325.1 | 3801   | 8800   | 5000 | 2  | 1.19E-08 | 116 | 2.32  |                                  |                      |
| DMRNW_015097336.1:23401  | NW_015097336.1 | 23401  | 23700  | 300  | 1  | 9.28E-08 | 5   | 1.667 | LOC106908409                     |                      |
| DMRNW_015097340.1:29501  | NW_015097340.1 | 29501  | 30300  | 800  | 3  | 4.46E-11 | 17  | 2.125 |                                  |                      |
| DMRNW_015097351.1:8501   | NW_015097351.1 | 8501   | 9700   | 1200 | 1  | 3.34E-08 | 40  | 3.333 | LOC106908458;LOC106908459        |                      |
| DMRNW_015097353.1:26901  | NW_015097353.1 | 26901  | 29900  | 3000 | 1  | 3.41E-08 | 129 | 4.3   | LOC106908470                     |                      |
| DMRNW_015097356.1:1701   | NW_015097356.1 | 1701   | 3800   | 2100 | 18 | 1.03E-23 | 108 | 5.143 |                                  |                      |
| DMRNW_015097356.1:9701   | NW_015097356.1 | 9701   | 10300  | 600  | 6  | 1.62E-23 | 22  | 3.667 |                                  |                      |
| DMRNW_015097361.1:61901  | NW_015097361.1 | 61901  | 62200  | 300  | 1  | 1.22E-09 | 6   | 2     |                                  |                      |
| DMRNW_015097365.1:24401  | NW_015097365.1 | 24401  | 26200  | 1800 | 4  | 1.20E-17 | 63  | 3.5   |                                  |                      |
| DMRNW_015097365.1:48001  | NW_015097365.1 | 48001  | 51100  | 3100 | 1  | 4.07E-08 | 92  | 2.968 | LOC106908515                     |                      |
| DMRNW_015097391.1:1      | NW_015097391.1 | 1      | 2600   | 2600 | 6  | 3.98E-12 | 43  | 1.654 |                                  |                      |
| DMRNW_015097400.1:80601  | NW_015097400.1 | 80601  | 84200  | 3600 | 1  | 5.67E-11 | 95  | 2.639 | LOC106908612                     |                      |
| DMRNW_015097406.1:24301  | NW_015097406.1 | 24301  | 25400  | 1100 | 1  | 2.46E-12 | 17  | 1.545 | LOC106908632                     |                      |
| DMRNW_015097406.1:28801  | NW_015097406.1 | 28801  | 30500  | 1700 | 2  | 3.36E-08 | 27  | 1.588 | LOC106908632                     |                      |
| DMRNW_015097406.1:36901  | NW_015097406.1 | 36901  | 39400  | 2500 | 2  | 6.06E-27 | 151 | 6.04  | LOC106908632                     |                      |
| DMRNW_015097411.1:52401  | NW_015097411.1 | 52401  | 58000  | 5600 | 8  | 1.15E-18 | 123 | 2.196 | LOC106908651                     |                      |
| DMRNW_015097418.1:49701  | NW_015097418.1 | 49701  | 50800  | 1100 | 3  | 1.29E-11 | 33  | 3     | LOC106908689                     |                      |
| DMRNW_015097420.1:22901  | NW_015097420.1 | 22901  | 28000  | 5100 | 11 | 5.89E-18 | 207 | 4.059 |                                  |                      |

|                          |                |        |        |      |    |          |     |       |                                 |             |
|--------------------------|----------------|--------|--------|------|----|----------|-----|-------|---------------------------------|-------------|
| DMRNW_015097428.1:82701  | NW_015097428.1 | 82701  | 84400  | 1700 | 1  | 2.29E-10 | 58  | 3.412 |                                 |             |
| DMRNW_015097431.1:4501   | NW_015097431.1 | 4501   | 6200   | 1700 | 1  | 2.31E-09 | 67  | 3.941 | siglec15                        |             |
| DMRNW_015097433.1:6301   | NW_015097433.1 | 6301   | 7400   | 1100 | 1  | 3.09E-08 | 29  | 2.636 |                                 |             |
| DMRNW_015097444.1:25601  | NW_015097444.1 | 25601  | 26500  | 900  | 2  | 7.39E-08 | 27  | 3     | LOC106908773                    |             |
| DMRNW_015097449.1:122901 | NW_015097449.1 | 122901 | 123600 | 700  | 2  | 7.12E-13 | 32  | 4.571 | cngb1                           | Receptor    |
| DMRNW_015097457.1:44601  | NW_015097457.1 | 44601  | 48600  | 4000 | 4  | 2.10E-11 | 142 | 3.55  |                                 |             |
| DMRNW_015097485.1:38401  | NW_015097485.1 | 38401  | 38800  | 400  | 2  | 5.60E-09 | 3   | 0.75  |                                 |             |
| DMRNW_015097488.1:46301  | NW_015097488.1 | 46301  | 50500  | 4200 | 1  | 7.29E-09 | 185 | 4.405 |                                 |             |
| DMRNW_015097507.1:47901  | NW_015097507.1 | 47901  | 48100  | 200  | 2  | 1.13E-10 | 3   | 1.5   |                                 |             |
| DMRNW_015097569.1:78201  | NW_015097569.1 | 78201  | 79700  | 1500 | 1  | 5.62E-10 | 44  | 2.933 | LOC106909149;LOC106909147       |             |
| DMRNW_015097586.1:51801  | NW_015097586.1 | 51801  | 57400  | 5600 | 1  | 2.10E-08 | 164 | 2.929 | arhgap5;LOC106909208            | Signaling   |
| DMRNW_015097635.1:78401  | NW_015097635.1 | 78401  | 79800  | 1400 | 1  | 2.06E-09 | 72  | 5.143 | yipf3                           | Development |
| DMRNW_015097645.1:59401  | NW_015097645.1 | 59401  | 60300  | 900  | 6  | 3.45E-14 | 17  | 1.889 | LOC106909380                    |             |
| DMRNW_015097647.1:90101  | NW_015097647.1 | 90101  | 92200  | 2100 | 3  | 4.36E-11 | 58  | 2.762 |                                 |             |
| DMRNW_015097662.1:45601  | NW_015097662.1 | 45601  | 46400  | 800  | 1  | 7.52E-08 | 31  | 3.875 |                                 |             |
| DMRNW_015097678.1:53601  | NW_015097678.1 | 53601  | 54800  | 1200 | 1  | 4.10E-23 | 12  | 1     |                                 |             |
| DMRNW_015097695.1:52801  | NW_015097695.1 | 52801  | 54488  | 1688 | 2  | 9.00E-10 | 71  | 4.206 |                                 |             |
| DMRNW_015097717.1:46401  | NW_015097717.1 | 46401  | 52000  | 5600 | 1  | 2.87E-08 | 170 | 3.036 |                                 |             |
| DMRNW_015097724.1:21101  | NW_015097724.1 | 21101  | 21400  | 300  | 2  | 6.50E-14 | 1   | 0.333 | LOC106909583                    |             |
| DMRNW_015097724.1:30901  | NW_015097724.1 | 30901  | 31700  | 800  | 1  | 5.56E-08 | 7   | 0.875 |                                 |             |
| DMRNW_015097724.1:49601  | NW_015097724.1 | 49601  | 50100  | 500  | 1  | 2.60E-10 | 1   | 0.2   |                                 |             |
| DMRNW_015097730.1:36201  | NW_015097730.1 | 36201  | 37100  | 900  | 2  | 1.64E-15 | 29  | 3.222 | LOC106909601                    |             |
| DMRNW_015097754.1:26001  | NW_015097754.1 | 26001  | 26900  | 900  | 2  | 6.56E-09 | 4   | 0.444 | LOC106909666                    |             |
| DMRNW_015097754.1:32901  | NW_015097754.1 | 32901  | 34200  | 1300 | 2  | 5.59E-08 | 11  | 0.846 | LOC106909666                    |             |
| DMRNW_015097757.1:13501  | NW_015097757.1 | 13501  | 19000  | 5500 | 1  | 1.70E-08 | 125 | 2.273 | LOC106909670                    |             |
| DMRNW_015097764.1:101    | NW_015097764.1 | 101    | 1800   | 1700 | 1  | 8.85E-08 | 52  | 3.059 |                                 |             |
| DMRNW_015097764.1:41301  | NW_015097764.1 | 41301  | 43900  | 2600 | 3  | 5.66E-18 | 61  | 2.346 |                                 |             |
| DMRNW_015097770.1:38301  | NW_015097770.1 | 38301  | 41400  | 3100 | 2  | 3.85E-09 | 171 | 5.516 | elk1                            |             |
| DMRNW_015097774.1:401    | NW_015097774.1 | 401    | 2700   | 2300 | 3  | 6.92E-11 | 33  | 1.435 |                                 |             |
| DMRNW_015097775.1:41301  | NW_015097775.1 | 41301  | 42200  | 900  | 2  | 2.72E-10 | 12  | 1.333 |                                 |             |
| DMRNW_015097776.1:18001  | NW_015097776.1 | 18001  | 19300  | 1300 | 1  | 9.10E-09 | 39  | 3     | LOC106909711                    |             |
| DMRNW_015097779.1:10801  | NW_015097779.1 | 10801  | 13500  | 2700 | 1  | 3.64E-08 | 80  | 2.963 | LOC106909718                    |             |
| DMRNW_015097784.1:10701  | NW_015097784.1 | 10701  | 13000  | 2300 | 1  | 2.48E-08 | 62  | 2.696 |                                 |             |
| DMRNW_015097792.1:17601  | NW_015097792.1 | 17601  | 19300  | 1700 | 2  | 1.87E-09 | 54  | 3.176 | LOC106909744                    |             |
| DMRNW_015097829.1:60301  | NW_015097829.1 | 60301  | 61500  | 1200 | 2  | 2.30E-08 | 19  | 1.583 |                                 |             |
| DMRNW_015097833.1:1101   | NW_015097833.1 | 1101   | 3700   | 2600 | 1  | 6.69E-09 | 42  | 1.615 |                                 |             |
| DMRNW_015097842.1:18901  | NW_015097842.1 | 18901  | 23900  | 5000 | 14 | 8.12E-17 | 134 | 2.68  | LOC106909861;LOC106909862       |             |
| DMRNW_015097844.1:37201  | NW_015097844.1 | 37201  | 37500  | 300  | 1  | 1.55E-08 | 11  | 3.667 | LOC106909868                    |             |
| DMRNW_015097845.1:47101  | NW_015097845.1 | 47101  | 48900  | 1800 | 2  | 2.48E-14 | 13  | 0.722 |                                 |             |
| DMRNW_015097857.1:9001   | NW_015097857.1 | 9001   | 9200   | 200  | 1  | 3.92E-11 | 1   | 0.5   |                                 |             |
| DMRNW_015097860.1:1      | NW_015097860.1 | 1      | 4500   | 4500 | 2  | 3.66E-20 | 69  | 1.533 |                                 |             |
| DMRNW_015097866.1:1      | NW_015097866.1 | 1      | 900    | 900  | 1  | 1.04E-09 | 17  | 1.889 |                                 |             |
| DMRNW_015097867.1:38001  | NW_015097867.1 | 38001  | 39400  | 1400 | 1  | 7.08E-09 | 64  | 4.571 |                                 |             |
| DMRNW_015097892.1:6201   | NW_015097892.1 | 6201   | 10400  | 4200 | 6  | 5.64E-19 | 112 | 2.667 |                                 |             |
| DMRNW_015097893.1:20501  | NW_015097893.1 | 20501  | 23300  | 2800 | 1  | 1.82E-15 | 35  | 1.25  |                                 |             |
| DMRNW_015097894.1:5501   | NW_015097894.1 | 5501   | 6900   | 1400 | 2  | 3.31E-11 | 50  | 3.571 |                                 |             |
| DMRNW_015097896.1:23601  | NW_015097896.1 | 23601  | 27000  | 3400 | 3  | 1.90E-09 | 114 | 3.353 | LOC106909979;LOC106909978       |             |
| DMRNW_015097896.1:45101  | NW_015097896.1 | 45101  | 47400  | 2300 | 3  | 4.14E-19 | 59  | 2.565 | LOC106909977;LOC106909982;phf19 | Epigenetic  |
| DMRNW_015097911.1:1801   | NW_015097911.1 | 1801   | 4900   | 3100 | 1  | 6.86E-09 | 111 | 3.581 |                                 |             |
| DMRNW_015097911.1:23801  | NW_015097911.1 | 23801  | 29000  | 5200 | 2  | 2.38E-10 | 166 | 3.192 | LOC106910013;LOC106910011       |             |
| DMRNW_015097912.1:1      | NW_015097912.1 | 1      | 500    | 500  | 1  | 2.46E-12 | 10  | 2     |                                 |             |
| DMRNW_015097914.1:12601  | NW_015097914.1 | 12601  | 13900  | 1300 | 1  | 8.16E-09 | 32  | 2.462 |                                 |             |
| DMRNW_015097917.1:19801  | NW_015097917.1 | 19801  | 26600  | 6800 | 5  | 1.76E-12 | 146 | 2.147 |                                 |             |
| DMRNW_015097917.1:27801  | NW_015097917.1 | 27801  | 29900  | 2100 | 2  | 2.46E-09 | 55  | 2.619 |                                 |             |
| DMRNW_015097925.1:25001  | NW_015097925.1 | 25001  | 26400  | 1400 | 1  | 4.09E-08 | 60  | 4.286 |                                 |             |
| DMRNW_015097926.1:45301  | NW_015097926.1 | 45301  | 46300  | 1000 | 1  | 3.47E-09 | 30  | 3     |                                 |             |
| DMRNW_015097935.1:16001  | NW_015097935.1 | 16001  | 16300  | 300  | 1  | 2.17E-08 | 2   | 0.667 |                                 |             |
| DMRNW_015097947.1:5201   | NW_015097947.1 | 5201   | 6000   | 800  | 2  | 1.08E-16 | 7   | 0.875 |                                 |             |
| DMRNW_015097953.1:39201  | NW_015097953.1 | 39201  | 39900  | 700  | 1  | 4.67E-09 | 19  | 2.714 | LOC106910118                    |             |
| DMRNW_015097961.1:20601  | NW_015097961.1 | 20601  | 22800  | 2200 | 2  | 1.54E-11 | 77  | 3.5   | LOC106910141                    |             |
| DMRNW_015097990.1:19301  | NW_015097990.1 | 19301  | 23400  | 4100 | 2  | 8.90E-14 | 91  | 2.22  |                                 |             |
| DMRNW_015097990.1:26601  | NW_015097990.1 | 26601  | 28800  | 2200 | 6  | 3.12E-10 | 94  | 4.273 |                                 |             |
| DMRNW_015097990.1:34101  | NW_015097990.1 | 34101  | 38300  | 4200 | 1  | 2.24E-08 | 202 | 4.81  |                                 |             |
| DMRNW_015098036.1:21101  | NW_015098036.1 | 21101  | 21500  | 400  | 1  | 3.44E-08 | 27  | 6.75  |                                 |             |
| DMRNW_015098041.1:37301  | NW_015098041.1 | 37301  | 40600  | 3300 | 1  | 2.08E-08 | 57  | 1.727 | LOC106910333                    |             |
| DMRNW_015098069.1:18901  | NW_015098069.1 | 18901  | 20800  | 1900 | 2  | 2.08E-17 | 76  | 4     |                                 |             |
| DMRNW_015098075.1:39601  | NW_015098075.1 | 39601  | 41900  | 2300 | 1  | 8.51E-08 | 92  | 4     |                                 |             |
| DMRNW_015098089.1:1      | NW_015098089.1 | 1      | 500    | 500  | 3  | 5.93E-12 | 11  | 2.2   |                                 |             |
| DMRNW_015098093.1:49301  | NW_015098093.1 | 49301  | 51800  | 2500 | 1  | 4.15E-09 | 73  | 2.92  |                                 |             |
| DMRNW_015098098.1:1      | NW_015098098.1 | 1      | 5700   | 5700 | 5  | 3.21E-12 | 85  | 1.491 | LOC106910464                    |             |
| DMRNW_015098098.1:9201   | NW_015098098.1 | 9201   | 14200  | 5000 | 10 | 2.31E-17 | 118 | 2.36  | LOC106910464;LOC106910463       |             |



|                         |                |       |       |      |    |          |     |       |                           |           |
|-------------------------|----------------|-------|-------|------|----|----------|-----|-------|---------------------------|-----------|
| DMRNW_015098098.1:21601 | NW_015098098.1 | 21601 | 29700 | 8100 | 2  | 1.66E-08 | 216 | 2.667 | LOC106910463              |           |
| DMRNW_015098104.1:55101 | NW_015098104.1 | 55101 | 56800 | 1700 | 2  | 3.02E-11 | 44  | 2.588 |                           |           |
| DMRNW_015098114.1:61001 | NW_015098114.1 | 61001 | 63600 | 2600 | 1  | 1.07E-08 | 46  | 1.769 | LOC106910492              |           |
| DMRNW_015098127.1:1     | NW_015098127.1 | 1     | 800   | 800  | 2  | 1.62E-14 | 13  | 1.625 |                           |           |
| DMRNW_015098133.1:18401 | NW_015098133.1 | 18401 | 18800 | 400  | 1  | 2.18E-08 | 6   | 1.5   |                           |           |
| DMRNW_015098154.1:32901 | NW_015098154.1 | 32901 | 33300 | 400  | 1  | 7.30E-09 | 2   | 0.5   |                           |           |
| DMRNW_015098177.1:32801 | NW_015098177.1 | 32801 | 32900 | 100  | 1  | 1.30E-08 | 4   | 4     |                           |           |
| DMRNW_015098193.1:32801 | NW_015098193.1 | 32801 | 36100 | 3300 | 4  | 6.55E-14 | 81  | 2.455 | LOC106910680              |           |
| DMRNW_015098206.1:7201  | NW_015098206.1 | 7201  | 7800  | 600  | 3  | 8.25E-15 | 16  | 2.667 |                           |           |
| DMRNW_015098248.1:45401 | NW_015098248.1 | 45401 | 47000 | 1600 | 2  | 1.12E-14 | 36  | 2.25  |                           |           |
| DMRNW_015098273.1:16501 | NW_015098273.1 | 16501 | 20200 | 3700 | 1  | 4.21E-14 | 143 | 3.865 | LOC106910866              |           |
| DMRNW_015098281.1:15001 | NW_015098281.1 | 15001 | 15800 | 800  | 1  | 4.28E-09 | 22  | 2.75  |                           |           |
| DMRNW_015098282.1:4101  | NW_015098282.1 | 4101  | 4600  | 500  | 1  | 4.42E-08 | 5   | 1     |                           |           |
| DMRNW_015098297.1:13701 | NW_015098297.1 | 13701 | 14300 | 600  | 1  | 1.32E-08 | 18  | 3     |                           |           |
| DMRNW_015098385.1:40001 | NW_015098385.1 | 40001 | 41100 | 1100 | 1  | 2.93E-08 | 16  | 1.455 |                           |           |
| DMRNW_015098395.1:8801  | NW_015098395.1 | 8801  | 14000 | 5200 | 3  | 8.99E-14 | 109 | 2.096 | LOC106911071              |           |
| DMRNW_015098395.1:29501 | NW_015098395.1 | 29501 | 30200 | 700  | 2  | 6.91E-09 | 11  | 1.571 | LOC106911071              |           |
| DMRNW_015098421.1:30701 | NW_015098421.1 | 30701 | 33900 | 3200 | 3  | 1.76E-08 | 52  | 1.625 |                           |           |
| DMRNW_015098452.1:1     | NW_015098452.1 | 1     | 1700  | 1700 | 4  | 3.13E-11 | 55  | 3.235 |                           |           |
| DMRNW_015098459.1:24001 | NW_015098459.1 | 24001 | 26100 | 2100 | 2  | 3.48E-11 | 48  | 2.286 |                           |           |
| DMRNW_015098502.1:201   | NW_015098502.1 | 201   | 3000  | 2800 | 1  | 6.07E-09 | 74  | 2.643 |                           |           |
| DMRNW_015098509.1:101   | NW_015098509.1 | 101   | 2100  | 2000 | 1  | 4.47E-08 | 20  | 1     | LOC106911268              |           |
| DMRNW_015098525.1:15301 | NW_015098525.1 | 15301 | 16100 | 800  | 3  | 3.62E-13 | 33  | 4.125 |                           |           |
| DMRNW_015098526.1:24601 | NW_015098526.1 | 24601 | 27400 | 2800 | 1  | 3.14E-08 | 28  | 1     | LOC106911299              |           |
| DMRNW_015098550.1:10401 | NW_015098550.1 | 10401 | 11000 | 600  | 1  | 4.68E-10 | 15  | 2.5   | LOC106911352              |           |
| DMRNW_015098560.1:30301 | NW_015098560.1 | 30301 | 30925 | 625  | 4  | 1.70E-38 | 13  | 2.08  |                           |           |
| DMRNW_015098566.1:6101  | NW_015098566.1 | 6101  | 8800  | 2700 | 1  | 9.71E-10 | 67  | 2.481 |                           |           |
| DMRNW_015098567.1:20201 | NW_015098567.1 | 20201 | 30100 | 9900 | 1  | 9.70E-08 | 140 | 1.414 | LOC106911384;LOC106911387 |           |
| DMRNW_015098578.1:26901 | NW_015098578.1 | 26901 | 27200 | 300  | 1  | 8.47E-09 | 11  | 3.667 | LOC106911406              |           |
| DMRNW_015098583.1:6701  | NW_015098583.1 | 6701  | 9400  | 2700 | 1  | 1.81E-09 | 149 | 5.519 |                           |           |
| DMRNW_015098586.1:28401 | NW_015098586.1 | 28401 | 30400 | 2000 | 2  | 2.47E-09 | 31  | 1.55  |                           |           |
| DMRNW_015098596.1:48301 | NW_015098596.1 | 48301 | 51200 | 2900 | 4  | 1.49E-09 | 45  | 1.552 | LOC106911437              |           |
| DMRNW_015098596.1:56501 | NW_015098596.1 | 56501 | 57300 | 800  | 4  | 4.09E-12 | 37  | 4.625 | LOC106911437              |           |
| DMRNW_015098605.1:1     | NW_015098605.1 | 1     | 500   | 500  | 1  | 1.18E-09 | 29  | 5.8   |                           |           |
| DMRNW_015098621.1:13101 | NW_015098621.1 | 13101 | 16000 | 2900 | 4  | 1.47E-11 | 44  | 1.517 |                           |           |
| DMRNW_015098621.1:19301 | NW_015098621.1 | 19301 | 20900 | 1600 | 1  | 5.86E-09 | 38  | 2.375 | LOC106911470              |           |
| DMRNW_015098621.1:26201 | NW_015098621.1 | 26201 | 26900 | 700  | 4  | 1.74E-14 | 22  | 3.143 | LOC106911470              |           |
| DMRNW_015098648.1:6701  | NW_015098648.1 | 6701  | 8000  | 1300 | 2  | 3.71E-11 | 8   | 0.615 | LOC106911506              |           |
| DMRNW_015098650.1:27401 | NW_015098650.1 | 27401 | 27900 | 500  | 1  | 2.62E-08 | 5   | 1     | LOC106911510              |           |
| DMRNW_015098662.1:20601 | NW_015098662.1 | 20601 | 21300 | 700  | 1  | 7.80E-09 | 13  | 1.857 |                           |           |
| DMRNW_015098694.1:9301  | NW_015098694.1 | 9301  | 9800  | 500  | 1  | 6.15E-08 | 14  | 2.8   |                           |           |
| DMRNW_015098775.1:1     | NW_015098775.1 | 1     | 1100  | 1100 | 2  | 4.43E-10 | 28  | 2.545 |                           |           |
| DMRNW_015098778.1:25401 | NW_015098778.1 | 25401 | 26977 | 1577 | 2  | 5.45E-10 | 65  | 4.122 |                           |           |
| DMRNW_015098779.1:22001 | NW_015098779.1 | 22001 | 26600 | 4600 | 5  | 4.82E-11 | 282 | 6.13  |                           |           |
| DMRNW_015098827.1:20701 | NW_015098827.1 | 20701 | 21100 | 400  | 1  | 5.33E-09 | 17  | 4.25  |                           |           |
| DMRNW_015098839.1:301   | NW_015098839.1 | 301   | 1500  | 1200 | 1  | 1.28E-11 | 34  | 2.833 |                           |           |
| DMRNW_015098839.1:4501  | NW_015098839.1 | 4501  | 11800 | 7300 | 4  | 2.76E-09 | 231 | 3.164 | LOC106911767              |           |
| DMRNW_015098840.1:18901 | NW_015098840.1 | 18901 | 19300 | 400  | 3  | 1.41E-29 | 18  | 4.5   | plcg2                     | Signaling |
| DMRNW_015098852.1:7101  | NW_015098852.1 | 7101  | 7300  | 200  | 1  | 6.51E-08 | 10  | 5     | LOC106911791              |           |
| DMRNW_015098854.1:21801 | NW_015098854.1 | 21801 | 25700 | 3900 | 1  | 4.19E-11 | 82  | 2.103 |                           |           |
| DMRNW_015098929.1:9401  | NW_015098929.1 | 9401  | 10500 | 1100 | 1  | 6.28E-08 | 17  | 1.545 | LOC106911887              |           |
| DMRNW_015098978.1:21001 | NW_015098978.1 | 21001 | 22900 | 1900 | 1  | 2.14E-14 | 65  | 3.421 |                           |           |
| DMRNW_015099009.1:13601 | NW_015099009.1 | 13601 | 14000 | 400  | 1  | 1.38E-19 | 20  | 5     | LOC106911984              |           |
| DMRNW_015099054.1:1     | NW_015099054.1 | 1     | 1600  | 1600 | 3  | 2.69E-11 | 6   | 0.375 | LOC106912031              |           |
| DMRNW_015099057.1:6701  | NW_015099057.1 | 6701  | 7100  | 400  | 1  | 9.99E-10 | 19  | 4.75  |                           |           |
| DMRNW_015099058.1:11001 | NW_015099058.1 | 11001 | 11300 | 300  | 1  | 7.25E-09 | 2   | 0.667 | LOC106912034              |           |
| DMRNW_015099074.1:201   | NW_015099074.1 | 201   | 1200  | 1000 | 1  | 3.22E-10 | 16  | 1.6   |                           |           |
| DMRNW_015099078.1:2701  | NW_015099078.1 | 2701  | 9800  | 7100 | 14 | 7.98E-16 | 185 | 2.606 |                           |           |
| DMRNW_015099100.1:20201 | NW_015099100.1 | 20201 | 20600 | 400  | 1  | 6.93E-08 | 3   | 0.75  |                           |           |
| DMRNW_015099105.1:601   | NW_015099105.1 | 601   | 1100  | 500  | 1  | 3.29E-08 | 5   | 1     |                           |           |
| DMRNW_015099156.1:6601  | NW_015099156.1 | 6601  | 7000  | 400  | 2  | 4.47E-11 | 15  | 3.75  | LOC106912130              |           |
| DMRNW_015099194.1:17201 | NW_015099194.1 | 17201 | 19100 | 1900 | 2  | 8.03E-09 | 58  | 3.053 |                           |           |
| DMRNW_015099279.1:1     | NW_015099279.1 | 1     | 2900  | 2900 | 14 | 1.37E-17 | 112 | 3.862 |                           |           |
| DMRNW_015099345.1:11501 | NW_015099345.1 | 11501 | 12800 | 1300 | 1  | 4.30E-08 | 22  | 1.692 |                           |           |
| DMRNW_015099381.1:5801  | NW_015099381.1 | 5801  | 9900  | 4100 | 5  | 3.19E-26 | 174 | 4.244 | cfap77;LOC106912394       |           |
| DMRNW_015099385.1:1     | NW_015099385.1 | 1     | 4800  | 4800 | 14 | 2.11E-18 | 159 | 3.312 |                           |           |
| DMRNW_015099412.1:11901 | NW_015099412.1 | 11901 | 12700 | 800  | 5  | 8.77E-12 | 36  | 4.5   |                           |           |
| DMRNW_015099414.1:3601  | NW_015099414.1 | 3601  | 4500  | 900  | 4  | 1.04E-15 | 37  | 4.111 |                           |           |
| DMRNW_015099485.1:101   | NW_015099485.1 | 101   | 900   | 800  | 2  | 9.04E-12 | 26  | 3.25  |                           |           |
| DMRNW_015099538.1:7601  | NW_015099538.1 | 7601  | 9000  | 1400 | 2  | 2.42E-09 | 39  | 2.786 |                           |           |
| DMRNW_015099557.1:6701  | NW_015099557.1 | 6701  | 8300  | 1600 | 1  | 8.93E-08 | 33  | 2.062 |                           |           |
| DMRNW_015099575.1:14201 | NW_015099575.1 | 14201 | 14953 | 753  | 1  | 3.96E-08 | 12  | 1.594 |                           |           |

|                         |                |       |       |      |   |          |     |        |                           |
|-------------------------|----------------|-------|-------|------|---|----------|-----|--------|---------------------------|
| DMRNW_015099621.1:6901  | NW_015099621.1 | 6901  | 9100  | 2200 | 2 | 1.37E-09 | 44  | 2      |                           |
| DMRNW_015099632.1:8201  | NW_015099632.1 | 8201  | 8900  | 700  | 1 | 2.57E-08 | 29  | 4.143  |                           |
| DMRNW_015099651.1:1     | NW_015099651.1 | 1     | 200   | 200  | 2 | 5.88E-10 | 10  | 5      |                           |
| DMRNW_015099685.1:12101 | NW_015099685.1 | 12101 | 13700 | 1600 | 2 | 3.44E-08 | 39  | 2.438  | LOC106912634              |
| DMRNW_015099689.1:3001  | NW_015099689.1 | 3001  | 6100  | 3100 | 3 | 9.82E-23 | 160 | 5.161  |                           |
| DMRNW_015099706.1:7101  | NW_015099706.1 | 7101  | 13800 | 6700 | 3 | 1.28E-10 | 163 | 2.433  |                           |
| DMRNW_015099717.1:1     | NW_015099717.1 | 1     | 1800  | 1800 | 1 | 5.92E-08 | 113 | 6.278  |                           |
| DMRNW_015099747.1:1     | NW_015099747.1 | 1     | 500   | 500  | 2 | 6.55E-09 | 11  | 2.2    | LOC106912689              |
| DMRNW_015099748.1:1     | NW_015099748.1 | 1     | 500   | 500  | 2 | 9.41E-09 | 31  | 6.2    |                           |
| DMRNW_015099824.1:5201  | NW_015099824.1 | 5201  | 7300  | 2100 | 2 | 6.18E-13 | 63  | 3      |                           |
| DMRNW_015099843.1:9401  | NW_015099843.1 | 9401  | 9600  | 200  | 1 | 8.15E-08 | 1   | 0.5    |                           |
| DMRNW_015099902.1:1801  | NW_015099902.1 | 1801  | 2900  | 1100 | 8 | 5.73E-14 | 14  | 1.273  | LOC106912802              |
| DMRNW_015099926.1:9401  | NW_015099926.1 | 9401  | 10800 | 1400 | 1 | 1.86E-08 | 42  | 3      |                           |
| DMRNW_015099981.1:10001 | NW_015099981.1 | 10001 | 11700 | 1700 | 4 | 5.67E-09 | 81  | 4.765  |                           |
| DMRNW_015099989.1:9901  | NW_015099989.1 | 9901  | 10100 | 200  | 1 | 2.73E-10 | 1   | 0.5    | LOC106912849              |
| DMRNW_015099992.1:13901 | NW_015099992.1 | 13901 | 14252 | 352  | 1 | 7.41E-09 | 11  | 3.125  |                           |
| DMRNW_015099994.1:8701  | NW_015099994.1 | 8701  | 10091 | 1391 | 2 | 2.34E-11 | 39  | 2.804  | LOC106912851              |
| DMRNW_015100010.1:401   | NW_015100010.1 | 401   | 1800  | 1400 | 1 | 5.23E-08 | 42  | 3      |                           |
| DMRNW_015100024.1:501   | NW_015100024.1 | 501   | 1200  | 700  | 1 | 6.48E-08 | 19  | 2.714  |                           |
| DMRNW_015100049.1:101   | NW_015100049.1 | 101   | 6800  | 6700 | 1 | 4.71E-11 | 230 | 3.433  | LOC106912894;LOC106912893 |
| DMRNW_015100083.1:1701  | NW_015100083.1 | 1701  | 2100  | 400  | 1 | 7.04E-08 | 14  | 3.5    |                           |
| DMRNW_015100101.1:101   | NW_015100101.1 | 101   | 3400  | 3300 | 1 | 1.54E-08 | 117 | 3.545  |                           |
| DMRNW_015100153.1:8701  | NW_015100153.1 | 8701  | 9100  | 400  | 1 | 1.03E-08 | 14  | 3.5    |                           |
| DMRNW_015100166.1:701   | NW_015100166.1 | 701   | 1300  | 600  | 4 | 5.16E-12 | 27  | 4.5    | LOC106912960              |
| DMRNW_015100171.1:7001  | NW_015100171.1 | 7001  | 7400  | 400  | 3 | 7.35E-16 | 24  | 6      |                           |
| DMRNW_015100185.1:7101  | NW_015100185.1 | 7101  | 7400  | 300  | 1 | 8.69E-08 | 2   | 0.667  |                           |
| DMRNW_015100201.1:1     | NW_015100201.1 | 1     | 800   | 800  | 4 | 1.24E-11 | 14  | 1.75   |                           |
| DMRNW_015100206.1:6101  | NW_015100206.1 | 6101  | 8700  | 2600 | 1 | 4.47E-08 | 53  | 2.038  |                           |
| DMRNW_015100231.1:1001  | NW_015100231.1 | 1001  | 2300  | 1300 | 1 | 1.57E-08 | 97  | 7.462  |                           |
| DMRNW_015100298.1:14201 | NW_015100298.1 | 14201 | 15900 | 1700 | 2 | 2.33E-19 | 84  | 4.941  | LOC106913027              |
| DMRNW_015100344.1:1201  | NW_015100344.1 | 1201  | 1600  | 400  | 2 | 7.60E-10 | 26  | 6.5    |                           |
| DMRNW_015100391.1:401   | NW_015100391.1 | 401   | 1100  | 700  | 1 | 2.06E-11 | 17  | 2.429  |                           |
| DMRNW_015100402.1:1     | NW_015100402.1 | 1     | 600   | 600  | 1 | 1.23E-09 | 32  | 5.333  |                           |
| DMRNW_015100415.1:14101 | NW_015100415.1 | 14101 | 16500 | 2400 | 9 | 6.85E-22 | 79  | 3.292  |                           |
| DMRNW_015100425.1:10701 | NW_015100425.1 | 10701 | 11500 | 800  | 1 | 3.34E-08 | 15  | 1.875  |                           |
| DMRNW_015100492.1:1     | NW_015100492.1 | 1     | 900   | 900  | 5 | 3.32E-21 | 8   | 0.889  |                           |
| DMRNW_015100492.1:7101  | NW_015100492.1 | 7101  | 8300  | 1200 | 3 | 1.07E-13 | 28  | 2.333  |                           |
| DMRNW_015100509.1:401   | NW_015100509.1 | 401   | 900   | 500  | 3 | 3.39E-12 | 3   | 0.6    | LOC106913083              |
| DMRNW_015100519.1:101   | NW_015100519.1 | 101   | 2900  | 2800 | 1 | 9.86E-08 | 130 | 4.643  |                           |
| DMRNW_015100519.1:9601  | NW_015100519.1 | 9601  | 10800 | 1200 | 3 | 1.08E-14 | 39  | 3.25   |                           |
| DMRNW_015100536.1:7001  | NW_015100536.1 | 7001  | 7900  | 900  | 1 | 4.37E-08 | 8   | 0.889  |                           |
| DMRNW_015100547.1:6701  | NW_015100547.1 | 6701  | 7892  | 1192 | 2 | 5.78E-08 | 29  | 2.433  |                           |
| DMRNW_015100582.1:7101  | NW_015100582.1 | 7101  | 7800  | 700  | 2 | 3.99E-11 | 31  | 4.429  |                           |
| DMRNW_015100622.1:301   | NW_015100622.1 | 301   | 1000  | 700  | 1 | 5.62E-09 | 14  | 2      |                           |
| DMRNW_015100651.1:1     | NW_015100651.1 | 1     | 600   | 600  | 3 | 2.28E-15 | 59  | 9.833  | LOC106913125              |
| DMRNW_015100651.1:7001  | NW_015100651.1 | 7001  | 7686  | 686  | 3 | 4.05E-16 | 72  | 10.496 | LOC106913125              |
| DMRNW_015100783.1:701   | NW_015100783.1 | 701   | 5000  | 4300 | 4 | 5.33E-17 | 67  | 1.558  | LOC106913150              |
| DMRNW_015100818.1:1     | NW_015100818.1 | 1     | 1200  | 1200 | 1 | 2.97E-09 | 15  | 1.25   | LOC106913163              |
| DMRNW_015100853.1:101   | NW_015100853.1 | 101   | 700   | 600  | 1 | 7.44E-08 | 35  | 5.833  |                           |
| DMRNW_015100889.1:1501  | NW_015100889.1 | 1501  | 2400  | 900  | 1 | 1.79E-08 | 22  | 2.444  |                           |
| DMRNW_015101011.1:3801  | NW_015101011.1 | 3801  | 5200  | 1400 | 1 | 3.74E-08 | 45  | 3.214  | LOC106913238              |
| DMRNW_015101039.1:501   | NW_015101039.1 | 501   | 1800  | 1300 | 1 | 9.70E-09 | 61  | 4.692  |                           |
| DMRNW_015101045.1:1     | NW_015101045.1 | 1     | 600   | 600  | 1 | 3.03E-15 | 5   | 0.833  |                           |
| DMRNW_015101094.1:4601  | NW_015101094.1 | 4601  | 4972  | 372  | 1 | 7.51E-09 | 4   | 1.075  |                           |
| DMRNW_015101144.1:22001 | NW_015101144.1 | 22001 | 22700 | 700  | 4 | 2.38E-19 | 15  | 2.143  |                           |
| DMRNW_015101205.1:301   | NW_015101205.1 | 301   | 2100  | 1800 | 1 | 7.16E-10 | 84  | 4.667  | LOC106913314              |
| DMRNW_015101208.1:1     | NW_015101208.1 | 1     | 2300  | 2300 | 1 | 9.88E-08 | 54  | 2.348  |                           |
| DMRNW_015101251.1:201   | NW_015101251.1 | 201   | 2100  | 1900 | 1 | 3.77E-09 | 89  | 4.684  | LOC106913336              |
| DMRNW_015101380.1:601   | NW_015101380.1 | 601   | 3274  | 2674 | 1 | 1.54E-08 | 64  | 2.393  |                           |
| DMRNW_015101514.1:201   | NW_015101514.1 | 201   | 1200  | 1000 | 4 | 7.42E-12 | 16  | 1.6    |                           |
| DMRNW_015101869.1:901   | NW_015101869.1 | 901   | 1900  | 1000 | 1 | 8.16E-09 | 14  | 1.4    |                           |
| DMRNW_015101909.1:1     | NW_015101909.1 | 1     | 1900  | 1900 | 1 | 9.51E-08 | 70  | 3.684  |                           |
| DMRNW_015102127.1:1     | NW_015102127.1 | 1     | 1774  | 1774 | 4 | 2.87E-09 | 75  | 4.228  |                           |
| DMRNW_015102260.1:6801  | NW_015102260.1 | 6801  | 7800  | 1000 | 2 | 7.49E-13 | 16  | 1.6    |                           |
| DMRNW_015102393.1:1201  | NW_015102393.1 | 1201  | 1567  | 367  | 1 | 5.40E-09 | 6   | 1.635  |                           |
| DMRNW_015102404.1:801   | NW_015102404.1 | 801   | 1561  | 761  | 5 | 3.49E-17 | 49  | 6.439  |                           |
| DMRNW_015102455.1:1     | NW_015102455.1 | 1     | 1200  | 1200 | 1 | 3.24E-08 | 16  | 1.333  |                           |
| DMRNW_015102471.1:201   | NW_015102471.1 | 201   | 800   | 600  | 1 | 1.92E-10 | 28  | 4.667  |                           |
| DMRNW_015102712.1:1     | NW_015102712.1 | 1     | 1386  | 1386 | 2 | 4.17E-11 | 30  | 2.165  |                           |
| DMRNW_015103142.1:1001  | NW_015103142.1 | 1001  | 1200  | 200  | 1 | 3.50E-10 | 3   | 1.5    |                           |
| DMRNW_015103297.1:301   | NW_015103297.1 | 301   | 1148  | 848  | 2 | 9.87E-12 | 33  | 3.892  |                           |
| DMRNW_015103351.1:101   | NW_015103351.1 | 101   | 1133  | 1033 | 1 | 7.19E-08 | 16  | 1.549  |                           |
| DMRNW_015103352.1:1     | NW_015103352.1 | 1     | 800   | 800  | 1 | 4.46E-08 | 35  | 4.375  |                           |

|                        |                |      |      |      |   |          |    |       |              |
|------------------------|----------------|------|------|------|---|----------|----|-------|--------------|
| DMRNW_015103363.1:1    | NW_015103363.1 | 1    | 1100 | 1100 | 1 | 1.02E-09 | 53 | 4.818 |              |
| DMRNW_015103562.1:1    | NW_015103562.1 | 1    | 1070 | 1070 | 2 | 3.30E-13 | 21 | 1.963 |              |
| DMRNW_015103615.1:101  | NW_015103615.1 | 101  | 1054 | 954  | 2 | 2.62E-08 | 12 | 1.258 |              |
| DMRNW_015103716.1:101  | NW_015103716.1 | 101  | 700  | 600  | 3 | 8.95E-10 | 30 | 5     |              |
| DMRNW_015103802.1:101  | NW_015103802.1 | 101  | 700  | 600  | 1 | 1.25E-12 | 21 | 3.5   |              |
| DMRNW_015103842.1:1    | NW_015103842.1 | 1    | 200  | 200  | 1 | 1.51E-11 | 5  | 2.5   |              |
| DMRNW_015103923.1:1    | NW_015103923.1 | 1    | 957  | 957  | 6 | 9.27E-18 | 38 | 3.971 |              |
| DMRNW_015103985.1:101  | NW_015103985.1 | 101  | 700  | 600  | 1 | 2.87E-10 | 5  | 0.833 |              |
| DMRNW_015103987.1:6201 | NW_015103987.1 | 6201 | 7082 | 882  | 2 | 1.01E-10 | 9  | 1.02  |              |
| DMRNW_015104423.1:1    | NW_015104423.1 | 1    | 700  | 700  | 7 | 8.11E-36 | 37 | 5.286 |              |
| DMRNW_015104492.1:1    | NW_015104492.1 | 1    | 400  | 400  | 1 | 8.93E-09 | 13 | 3.25  |              |
| DMRNW_015104574.1:101  | NW_015104574.1 | 101  | 800  | 700  | 1 | 4.00E-08 | 21 | 3     |              |
| DMRNW_015104583.1:201  | NW_015104583.1 | 201  | 700  | 500  | 1 | 1.79E-08 | 21 | 4.2   |              |
| DMRNW_015104757.1:1    | NW_015104757.1 | 1    | 500  | 500  | 1 | 6.87E-11 | 8  | 1.6   |              |
| DMRNW_015104852.1:1    | NW_015104852.1 | 1    | 766  | 766  | 2 | 2.47E-10 | 13 | 1.697 |              |
| DMRNW_015104886.1:1    | NW_015104886.1 | 1    | 700  | 700  | 1 | 9.85E-11 | 41 | 5.857 |              |
| DMRNW_015104907.1:1    | NW_015104907.1 | 1    | 400  | 400  | 2 | 5.61E-20 | 1  | 0.25  |              |
| DMRNW_015105204.1:301  | NW_015105204.1 | 301  | 500  | 200  | 2 | 4.05E-09 | 8  | 4     |              |
| DMRNW_015105262.1:401  | NW_015105262.1 | 401  | 705  | 305  | 1 | 8.01E-09 | 8  | 2.623 |              |
| DMRNW_015105318.1:301  | NW_015105318.1 | 301  | 600  | 300  | 1 | 6.42E-08 | 20 | 6.667 |              |
| DMRNW_015105360.1:1    | NW_015105360.1 | 1    | 693  | 693  | 1 | 8.76E-08 | 26 | 3.752 |              |
| DMRNW_015105417.1:101  | NW_015105417.1 | 101  | 686  | 586  | 1 | 5.16E-10 | 21 | 3.584 |              |
| DMRNW_015105565.1:201  | NW_015105565.1 | 201  | 500  | 300  | 2 | 3.95E-08 | 0  | 0     |              |
| DMRNW_015105604.1:1    | NW_015105604.1 | 1    | 664  | 664  | 4 | 3.59E-16 | 8  | 1.205 |              |
| DMRNW_015105611.1:1    | NW_015105611.1 | 1    | 600  | 600  | 2 | 5.98E-10 | 1  | 0.167 |              |
| DMRNW_015105746.1:1    | NW_015105746.1 | 1    | 650  | 650  | 5 | 3.11E-35 | 10 | 1.538 |              |
| DMRNW_015105796.1:1    | NW_015105796.1 | 1    | 644  | 644  | 2 | 1.35E-09 | 34 | 5.28  |              |
| DMRNW_015105829.1:1    | NW_015105829.1 | 1    | 640  | 640  | 1 | 3.05E-08 | 34 | 5.312 |              |
| DMRNW_015105889.1:1    | NW_015105889.1 | 1    | 633  | 633  | 2 | 3.29E-09 | 23 | 3.633 |              |
| DMRNW_015105972.1:201  | NW_015105972.1 | 201  | 600  | 400  | 1 | 5.25E-09 | 19 | 4.75  |              |
| DMRNW_015106420.1:1    | NW_015106420.1 | 1    | 579  | 579  | 1 | 1.97E-09 | 44 | 7.599 | LOC106913806 |
| DMRNW_015106491.1:101  | NW_015106491.1 | 101  | 573  | 473  | 2 | 1.86E-10 | 19 | 4.017 |              |
| DMRNW_015106570.1:1    | NW_015106570.1 | 1    | 567  | 567  | 1 | 2.50E-09 | 24 | 4.233 |              |
| DMRNW_015106827.1:101  | NW_015106827.1 | 101  | 545  | 445  | 1 | 1.15E-09 | 0  | 0     |              |
| DMRNW_015106951.1:1    | NW_015106951.1 | 1    | 500  | 500  | 3 | 8.85E-13 | 0  | 0     |              |
| DMRNW_015107034.1:1    | NW_015107034.1 | 1    | 500  | 500  | 2 | 3.07E-11 | 16 | 3.2   |              |
| DMRNW_015107292.1:1    | NW_015107292.1 | 1    | 500  | 500  | 1 | 1.60E-08 | 45 | 9     |              |
| DMRNW_015107592.1:1    | NW_015107592.1 | 1    | 487  | 487  | 1 | 1.16E-08 | 0  | 0     |              |
| DMRNW_015107636.1:1    | NW_015107636.1 | 1    | 484  | 484  | 1 | 5.41E-12 | 32 | 6.612 |              |
| DMRNW_015107963.1:201  | NW_015107963.1 | 201  | 462  | 262  | 1 | 9.30E-08 | 10 | 3.817 |              |
| DMRNW_015107980.1:1    | NW_015107980.1 | 1    | 400  | 400  | 1 | 8.04E-08 | 16 | 4     |              |
| DMRNW_015108246.1:1    | NW_015108246.1 | 1    | 442  | 442  | 1 | 6.45E-08 | 20 | 4.525 |              |
| DMRNW_015108250.1:1    | NW_015108250.1 | 1    | 442  | 442  | 1 | 2.48E-09 | 1  | 0.226 |              |
| DMRNW_015108354.1:1    | NW_015108354.1 | 1    | 300  | 300  | 1 | 2.75E-11 | 19 | 6.333 |              |
| DMRNW_015108419.1:1    | NW_015108419.1 | 1    | 200  | 200  | 1 | 6.93E-09 | 10 | 5     |              |
| DMRNW_015108676.1:1    | NW_015108676.1 | 1    | 400  | 400  | 1 | 1.62E-08 | 23 | 5.75  |              |
| DMRNW_015108848.1:1    | NW_015108848.1 | 1    | 399  | 399  | 1 | 5.88E-08 | 10 | 2.506 |              |
| DMRNW_015109253.1:1    | NW_015109253.1 | 1    | 373  | 373  | 1 | 4.06E-08 | 14 | 3.753 |              |
| DMRNW_015109357.1:1    | NW_015109357.1 | 1    | 200  | 200  | 1 | 2.02E-08 | 1  | 0.5   |              |
| DMRNW_015109362.1:101  | NW_015109362.1 | 101  | 367  | 267  | 1 | 3.16E-08 | 8  | 2.996 |              |
| DMRNW_015109702.1:1    | NW_015109702.1 | 1    | 345  | 345  | 1 | 5.19E-08 | 21 | 6.087 |              |
| DMRNW_015109708.1:1    | NW_015109708.1 | 1    | 344  | 344  | 1 | 2.10E-08 | 18 | 5.233 |              |
| DMRNW_015109793.1:1    | NW_015109793.1 | 1    | 340  | 340  | 1 | 3.50E-14 | 16 | 4.706 |              |
| DMRNW_015109859.1:1    | NW_015109859.1 | 1    | 335  | 335  | 2 | 6.77E-14 | 11 | 3.284 |              |
| DMRNW_015109955.1:1    | NW_015109955.1 | 1    | 300  | 300  | 2 | 7.05E-10 | 1  | 0.333 |              |
| DMRNW_015110161.1:1    | NW_015110161.1 | 1    | 318  | 318  | 1 | 1.47E-09 | 10 | 3.145 |              |
| DMRNW_015111732.1:1    | NW_015111732.1 | 1    | 238  | 238  | 3 | 2.12E-29 | 0  | 0     |              |
| DMRNW_015111781.1:1    | NW_015111781.1 | 1    | 236  | 236  | 1 | 5.03E-09 | 8  | 3.39  |              |
| DMRNW_015112219.1:1    | NW_015112219.1 | 1    | 200  | 200  | 1 | 3.91E-08 | 16 | 8     |              |

**Supplemental Table S5**  
**Overlap 94 Genes All Comparissons**

| DMR Name       | Start  | Stop   | Length | # Sig Win | minP     | CpG # | CpG Density | Gene Annotation           |
|----------------|--------|--------|--------|-----------|----------|-------|-------------|---------------------------|
| NW_015094516.1 | 123601 | 126600 | 3000   | 2         | 1.63E-12 | 41    | 1.366666667 |                           |
| NW_015094524.1 | 268201 | 269500 | 1300   | 1         | 1.40E-11 | 15    | 1.153846154 | LOC106916498              |
| NW_015094535.1 | 197101 | 197800 | 700    | 2         | 1.33E-17 | 25    | 3.571428571 | LOC106920206              |
| NW_015094548.1 | 584901 | 585300 | 400    | 1         | 5.26E-11 | 2     | 0.5         | drosha                    |
| NW_015094573.1 | 228401 | 232400 | 4000   | 5         | 1.06E-12 | 59    | 1.475       | LOC106933764              |
| NW_015094600.1 | 365901 | 367800 | 1900   | 1         | 2.04E-08 | 66    | 3.473684211 | LOC106910644              |
| NW_015094642.1 | 351401 | 352300 | 900    | 1         | 2.32E-08 | 19    | 2.111111111 |                           |
| NW_015094691.1 | 57701  | 62900  | 5200   | 1         | 2.92E-11 | 74    | 1.423076923 |                           |
| NW_015094692.1 | 195901 | 196600 | 700    | 3         | 3.90E-13 | 10    | 1.428571429 | ufm1                      |
| NW_015094694.1 | 134101 | 134400 | 300    | 2         | 7.82E-12 | 7     | 2.333333333 | rreb1                     |
| NW_015094696.1 | 334101 | 336900 | 2800   | 9         | 3.46E-33 | 103   | 3.678571429 |                           |
| NW_015094696.1 | 339901 | 341500 | 1600   | 4         | 6.11E-28 | 47    | 2.9375      |                           |
| NW_015094699.1 | 416401 | 417700 | 1300   | 3         | 2.46E-08 | 38    | 2.923076923 | LOC106916141;LOC106916151 |
| NW_015094777.1 | 164001 | 164500 | 500    | 1         | 9.41E-10 | 13    | 2.6         |                           |
| NW_015094829.1 | 383101 | 384100 | 1000   | 5         | 9.77E-20 | 48    | 4.8         |                           |
| NW_015094857.1 | 3601   | 6100   | 2500   | 11        | 2.20E-39 | 32    | 1.28        | LOC106919185;LOC106919182 |
| NW_015094912.1 | 104701 | 105600 | 900    | 5         | 4.41E-16 | 17    | 1.888888889 | LOC106920123              |
| NW_015094934.1 | 126101 | 128000 | 1900   | 5         | 4.02E-15 | 51    | 2.684210526 |                           |
| NW_015094955.1 | 98501  | 99900  | 1400   | 4         | 8.85E-17 | 74    | 5.285714286 | arhgap21                  |
| NW_015094959.1 | 142701 | 144800 | 2100   | 7         | 2.44E-37 | 41    | 1.952380952 | trps1                     |
| NW_015095036.1 | 2901   | 4800   | 1900   | 13        | 7.39E-25 | 56    | 2.947368421 |                           |
| NW_015095051.1 | 294101 | 298200 | 4100   | 5         | 1.58E-44 | 94    | 2.292682927 | nyap1;LOC106922191        |
| NW_015095076.1 | 269301 | 271300 | 2000   | 1         | 4.31E-08 | 50    | 2.5         |                           |
| NW_015095197.1 | 124301 | 126300 | 2000   | 3         | 6.82E-09 | 64    | 3.2         | celsr2                    |
| NW_015095229.1 | 183401 | 189500 | 6100   | 2         | 1.38E-08 | 287   | 4.704918033 | LOC106924783;LOC106924784 |
| NW_015095294.1 | 183601 | 185200 | 1600   | 3         | 1.62E-19 | 41    | 2.5625      | LOC106925544              |
| NW_015095356.1 | 111301 | 112400 | 1100   | 4         | 2.29E-14 | 39    | 3.545454545 |                           |
| NW_015095356.1 | 117101 | 119500 | 2400   | 2         | 3.47E-15 | 56    | 2.333333333 | LOC106926305              |
| NW_015095367.1 | 390801 | 392749 | 1949   | 4         | 1.72E-17 | 37    | 1.898409441 |                           |
| NW_015095375.1 | 1      | 400    | 400    | 2         | 8.48E-18 | 9     | 2.25        |                           |
| NW_015095432.1 | 27001  | 27500  | 500    | 3         | 9.86E-20 | 5     | 1           | LOC106927110              |
| NW_015095434.1 | 34801  | 37600  | 2800   | 1         | 5.42E-08 | 61    | 2.178571429 | LOC106927141              |
| NW_015095442.1 | 54201  | 55900  | 1700   | 9         | 2.11E-13 | 15    | 0.882352941 |                           |
| NW_015095466.1 | 10001  | 11900  | 1900   | 2         | 2.68E-15 | 57    | 3           | LOC106927541              |
| NW_015095471.1 | 167601 | 170000 | 2400   | 4         | 3.81E-13 | 24    | 1           |                           |
| NW_015095477.1 | 39101  | 42000  | 2900   | 6         | 4.57E-17 | 49    | 1.689655172 | LOC106927690              |
| NW_015095590.1 | 163601 | 165400 | 1800   | 2         | 2.15E-08 | 51    | 2.833333333 | col11a1                   |
| NW_015095672.1 | 98401  | 102100 | 3700   | 5         | 1.61E-11 | 107   | 2.891891892 | scara5                    |
| NW_015095745.1 | 165701 | 166000 | 300    | 1         | 9.45E-16 | 16    | 5.333333333 | socs5                     |
| NW_015095760.1 | 156401 | 158300 | 1900   | 2         | 9.34E-18 | 19    | 1           |                           |
| NW_015095888.1 | 126701 | 127300 | 600    | 1         | 5.29E-11 | 10    | 1.666666667 | dhx36                     |
| NW_015096047.1 | 19601  | 24000  | 4400   | 1         | 1.75E-11 | 122   | 2.772727273 |                           |
| NW_015096147.1 | 39701  | 42700  | 3000   | 1         | 6.67E-08 | 72    | 2.4         |                           |
| NW_015096230.1 | 119901 | 121000 | 1100   | 2         | 1.35E-23 | 60    | 5.454545455 | LOC106934044              |
| NW_015096258.1 | 132501 | 134862 | 2362   | 3         | 6.02E-27 | 37    | 1.566469094 |                           |
| NW_015096428.1 | 65401  | 66100  | 700    | 3         | 5.62E-27 | 19    | 2.714285714 | LOC106904219;LOC106904222 |
| NW_015096449.1 | 15701  | 16400  | 700    | 3         | 1.48E-20 | 24    | 3.428571429 |                           |
| NW_015096449.1 | 19801  | 20500  | 700    | 3         | 6.78E-27 | 38    | 5.428571429 |                           |
| NW_015096502.1 | 7401   | 14400  | 7000   | 11        | 1.43E-15 | 129   | 1.842857143 |                           |
| NW_015096590.1 | 7301   | 7800   | 500    | 2         | 3.09E-12 | 16    | 3.2         | eya2                      |

|                |       |       |       |    |          |     |             |                           |
|----------------|-------|-------|-------|----|----------|-----|-------------|---------------------------|
| NW_015096605.1 | 17101 | 22500 | 5400  | 3  | 2.03E-10 | 121 | 2.240740741 | LOC106905197              |
| NW_015096617.1 | 32001 | 33200 | 1200  | 1  | 1.92E-12 | 24  | 2           | LOC106905274              |
| NW_015096722.1 | 56101 | 57900 | 1800  | 1  | 2.24E-12 | 46  | 2.555555556 |                           |
| NW_015096775.1 | 101   | 800   | 700   | 2  | 1.07E-09 | 13  | 1.857142857 |                           |
| NW_015096810.1 | 43901 | 45400 | 1500  | 2  | 3.44E-14 | 20  | 1.333333333 |                           |
| NW_015096828.1 | 1     | 600   | 600   | 5  | 7.44E-21 | 5   | 0.833333333 |                           |
| NW_015096841.1 | 35301 | 38600 | 3300  | 3  | 1.08E-13 | 90  | 2.727272727 |                           |
| NW_015096896.1 | 87901 | 90800 | 2900  | 4  | 1.82E-12 | 115 | 3.965517241 |                           |
| NW_015096929.1 | 75101 | 81100 | 6000  | 3  | 7.99E-12 | 140 | 2.333333333 | LOC106906729              |
| NW_015097029.1 | 72001 | 73600 | 1600  | 3  | 1.22E-15 | 31  | 1.9375      |                           |
| NW_015097309.1 | 35001 | 38800 | 3800  | 4  | 3.19E-08 | 140 | 3.684210526 |                           |
| NW_015097309.1 | 44901 | 49500 | 4600  | 5  | 1.69E-12 | 111 | 2.413043478 | LOC106908309              |
| NW_015097309.1 | 54101 | 67200 | 13100 | 11 | 2.48E-28 | 327 | 2.496183206 |                           |
| NW_015097336.1 | 23501 | 26400 | 2900  | 2  | 2.49E-11 | 32  | 1.103448276 | LOC106908409              |
| NW_015097353.1 | 26801 | 27100 | 300   | 2  | 4.07E-28 | 5   | 1.666666667 | LOC106908470              |
| NW_015097356.1 | 1201  | 3900  | 2700  | 18 | 4.96E-22 | 116 | 4.296296296 |                           |
| NW_015097356.1 | 9701  | 10500 | 800   | 6  | 1.31E-21 | 22  | 2.75        |                           |
| NW_015097365.1 | 24401 | 28300 | 3900  | 3  | 5.45E-20 | 144 | 3.692307692 | LOC106908515              |
| NW_015097418.1 | 49901 | 50800 | 900   | 7  | 6.53E-15 | 24  | 2.666666667 | LOC106908689              |
| NW_015097433.1 | 6301  | 7400  | 1100  | 5  | 1.55E-22 | 29  | 2.636363636 |                           |
| NW_015097926.1 | 46001 | 46200 | 200   | 1  | 8.02E-12 | 9   | 4.5         |                           |
| NW_015097947.1 | 5101  | 5700  | 600   | 2  | 2.14E-21 | 2   | 0.333333333 |                           |
| NW_015098098.1 | 9201  | 14200 | 5000  | 2  | 1.51E-09 | 118 | 2.36        | LOC106910464;LOC106910463 |
| NW_015098177.1 | 32101 | 33000 | 900   | 1  | 2.83E-26 | 18  | 2           |                           |
| NW_015098779.1 | 22001 | 26800 | 4800  | 9  | 2.46E-12 | 293 | 6.104166667 |                           |
| NW_015098839.1 | 4801  | 9100  | 4300  | 21 | 1.26E-34 | 124 | 2.88372093  | LOC106911767              |
| NW_015098839.1 | 10101 | 11700 | 1600  | 5  | 2.38E-23 | 56  | 3.5         |                           |
| NW_015099009.1 | 13701 | 15000 | 1300  | 2  | 1.87E-18 | 31  | 2.384615385 | LOC106911984              |
| NW_015099078.1 | 2701  | 9800  | 7100  | 12 | 8.28E-15 | 185 | 2.605633803 |                           |
| NW_015099381.1 | 5801  | 11000 | 5200  | 5  | 2.63E-29 | 229 | 4.403846154 | cfap77;LOC106912394       |
| NW_015099902.1 | 1801  | 2900  | 1100  | 9  | 3.01E-27 | 14  | 1.272727273 | LOC106912802              |
| NW_015100024.1 | 1     | 1600  | 1600  | 1  | 1.63E-09 | 38  | 2.375       |                           |
| NW_015100298.1 | 14201 | 15700 | 1500  | 2  | 3.33E-15 | 84  | 5.6         | LOC106913027              |
| NW_015100391.1 | 101   | 1100  | 1000  | 1  | 7.35E-10 | 30  | 3           |                           |
| NW_015100582.1 | 7101  | 7800  | 700   | 2  | 1.16E-12 | 31  | 4.428571429 |                           |
| NW_015101045.1 | 1     | 600   | 600   | 2  | 1.82E-16 | 5   | 0.833333333 |                           |
| NW_015101144.1 | 22001 | 22600 | 600   | 4  | 2.57E-10 | 13  | 2.166666667 |                           |
| NW_015102393.1 | 1201  | 1567  | 367   | 2  | 1.68E-12 | 6   | 1.634877384 |                           |
| NW_015103351.1 | 101   | 1133  | 1033  | 3  | 1.36E-14 | 16  | 1.548886738 |                           |
| NW_015104907.1 | 1     | 400   | 400   | 3  | 2.14E-25 | 1   | 0.25        |                           |
| NW_015105204.1 | 201   | 500   | 300   | 2  | 9.86E-11 | 15  | 5           |                           |
| NW_015105746.1 | 1     | 650   | 650   | 5  | 2.40E-57 | 10  | 1.538461538 |                           |
| NW_015107034.1 | 101   | 500   | 400   | 3  | 6.69E-14 | 12  | 3           |                           |
| NW_015107963.1 | 201   | 462   | 262   | 2  | 1.72E-20 | 10  | 3.816793893 |                           |

**Supplemental Table S6**  
**DMR Associated Gene Pathways / Groups**

| Name Pathways / Groups Enriched                                         | # of Entities | Overlap | Percent Overlap | Overlapping Entities                                                                                                                                                                                                                                                                                                                                                                                                                                                                             | p-value   |
|-------------------------------------------------------------------------|---------------|---------|-----------------|--------------------------------------------------------------------------------------------------------------------------------------------------------------------------------------------------------------------------------------------------------------------------------------------------------------------------------------------------------------------------------------------------------------------------------------------------------------------------------------------------|-----------|
| Proteins Involved in Neuroblastoma                                      | 218           | 25      | 9               | ABCC6;DCC;GSK3B;RELN;DCLK1;SKP2;GPC3;ALK;NTN1;FRNK;NGFR;VAV1;OPRD1;HDAC8;MTOR;EFNB2;MPPED2;MYCL;EPAS1;EPHB6;LIN28B;TP73;RASSF1;TRPC1;ADM2                                                                                                                                                                                                                                                                                                                                                        | 4.49E-08  |
| Kidney Cells Cilia Organization                                         | 34            | 10      | 14              | FOSL1;GSK3B;AXIN1;KIFAP3;ZEB1;WNT5B;DCDC2;NPHP4;PKD1;LRP6                                                                                                                                                                                                                                                                                                                                                                                                                                        | 3.80E-06  |
| Norepinephrine Neuronal Release                                         | 61            | 10      | 12              | RAB11A;EXOC5;MAOB;IQGAP1;CPLX1;KIFAP3;CACNA2D2;UNC13B;ALDH1A3;SNAP25                                                                                                                                                                                                                                                                                                                                                                                                                             | 1.19E-05  |
| Natural Killer Cell Inhibitory Receptor Signaling                       | 62            | 11      | 10              | CDH8;CDH11;CDH13;CDH20;VAV1;VAV2;CDH22;VAV3;CRK;PLCG2;FAT1                                                                                                                                                                                                                                                                                                                                                                                                                                       | 2.89E-05  |
| Proteins Involved in Epilepsy                                           | 284           | 26      | 6               | SPTAN1;GRIA2;GRM5;GRM8;PPP3CA;DPYSL2;DSCAM;KCNQ3;GABBR1;ADCY8;SLC1A3;ADK;SLC8A1;SNAP25;CNTNAP2;NTSR1;OPRD1;RYYR3;RYYR1;CLCN2;MTOR;KCNK2;HLF;MAGI2;CALB2;TRPC1                                                                                                                                                                                                                                                                                                                                    | 5.90E-05  |
| EphrinB -> Cytoskeleton Signaling                                       | 22            | 6       | 27              | EFNB1;EFNB2;IQGAP1;CRK;DOCK1;FRNK                                                                                                                                                                                                                                                                                                                                                                                                                                                                | 7.26E-05  |
| CD157/ITGB2 Signaling in Myeloid Cell                                   | 33            | 8       | 19              | FGR;IQGAP1;ACTN1;GSK3B;CRK;VAV1;DOCK1;FRNK                                                                                                                                                                                                                                                                                                                                                                                                                                                       | 7.33E-05  |
| Kidney Cells Cilia Organization                                         | 34            | 10      | 14              | FOSL1;GSK3B;AXIN1;KIFAP3;ZEB1;WNT5B;DCDC2;NPHP4;PKD1;LRP6                                                                                                                                                                                                                                                                                                                                                                                                                                        | 0.0001171 |
| Cochlear Hair Cell Stereocilia Proteins Mutations (Age-Related)         | 19            | 5       | 26              | USH1G;ESPN;PTPRQ;EPS8;PCDH15                                                                                                                                                                                                                                                                                                                                                                                                                                                                     | 0.000135  |
| FibronectinR -> AP-1/ELK/SRF/SREBF Signaling                            | 55            | 12      | 11              | ITGA11;SRF;VAV1;MAP2K7;VAV2;DOCK1;ITPR1;ITGA10;MAP2K4;ELK1;CRK;FRNK                                                                                                                                                                                                                                                                                                                                                                                                                              | 0.0001568 |
| Dopamine Mediated Glutamate Release and Glutamate Uptake Circle         | 34            | 8       | 13              | SLC17A8;ADCY8;CACNA2D2;CACNA1B;SLC1A3;SLC1A5;GLS;SNAP25                                                                                                                                                                                                                                                                                                                                                                                                                                          | 0.0002091 |
| Proteins Involved in Hearing Loss                                       | 217           | 18      | 7               | USH1G;GSK3B;ESPN;COL4A6;TMPRSS3;COL11A1;PTPRQ;ATP8B1;PCDH15;OTOF;LRP2;SLC17A8;CLDN11;GRXCR1;DCDC2;CASP9;TPMT;NEU1                                                                                                                                                                                                                                                                                                                                                                                | 0.000234  |
| Glutamate Release                                                       | 23            | 5       | 20              | SLC17A8;SLC1A3;SLC1A5;GLS;GLS2                                                                                                                                                                                                                                                                                                                                                                                                                                                                   | 0.0002537 |
| EphrinB -> MAPK/JUN/FOS Signaling                                       | 35            | 7       | 18              | EFNB1;EFNB2;MAP2K4;CRK;MAP2K7;DOCK1;FRNK                                                                                                                                                                                                                                                                                                                                                                                                                                                         | 0.0002618 |
| WNT in Epithelial to Mesenchymal Transition in Cancer                   | 53            | 10      | 8               | GSK3B;AXIN1;PATJ;AXL;TCF4;DVL3;ZEB1;WNT5B;TJP1;LRP6                                                                                                                                                                                                                                                                                                                                                                                                                                              | 0.0005219 |
| Dopamine Mediated Glutamate Release/Uptake Circle in Neuron in Migraine | 22            | 6       | 13              | SLC17A8;ADCY8;CACNA2D2;CACNA1B;GLS;SNAP25                                                                                                                                                                                                                                                                                                                                                                                                                                                        | 0.0005399 |
| Proteins Involved in Huntington Disease                                 | 111           | 14      | 7               | CAPN7;GRM5;NCOR1;PDE10A;PSMA1;ZDHHC13;GABBR1;ADK;RAB11A;CEBPA;ITPR1;MTOR;CAPN5;CALB2                                                                                                                                                                                                                                                                                                                                                                                                             | 0.0006834 |
| FibronectinR -> NF-kB Signaling                                         | 22            | 7       | 15              | ITGA11;VAV1;DOCK1;ITGA10;MAP2K4;CRK;FRNK                                                                                                                                                                                                                                                                                                                                                                                                                                                         | 0.0007683 |
| Proteins Involved in Azoospermia                                        | 41            | 6       | 14              | SEPT7;CDK9;GSK3B;MTMR2;CLDN11;DROSHA                                                                                                                                                                                                                                                                                                                                                                                                                                                             | 0.000866  |
| CDH1 Down regulation Promotes Cancer Cell Migration and Metastases      | 61            | 10      | 8               | IQGAP1;ARHGAP35;GSK3B;AXIN1;VAV2;TCF4;DVL3;ZEB1;WNT5B;LRP6                                                                                                                                                                                                                                                                                                                                                                                                                                       | 0.0010916 |
| WNT Signaling in Cystic Kidney Disease                                  | 46            | 8       | 10              | ARRB1;GSK3B;AXIN1;MAP2K7;DVL3;MAP2K4;PKD1;LRP6                                                                                                                                                                                                                                                                                                                                                                                                                                                   | 0.0012888 |
| Exocytosis: Vesicle Fusion                                              | 20            | 5       | 20              | RAB11A;CPLX1;UNC13B;OTOF;SNAP25                                                                                                                                                                                                                                                                                                                                                                                                                                                                  | 0.0013008 |
| Eat me Signal: Apoptotic Cell Induces Phagocytosis                      | 42            | 7       | 9               | IQGAP1;DOCK1;AXL;ITGB5;ITPR1;CRK;FRNK                                                                                                                                                                                                                                                                                                                                                                                                                                                            | 0.0014891 |
| Atlas of Signaling                                                      | 380           | 76      | 4               | ARHGAP5;GRAP;PPP3CA;PRKD1;MAP2K5;MAP2K7;PLXNA4;PDE10A;TSPAN9;ADCY8;VAV3;CNTNAP4;ALK;CD81;RYYR3;RYYR1;PLCH1;PTGIR;PLA2G16;DUSP28;GPR139;SRF;DCC;DOCK1;SRGAP1;DVL3;MAP2K4;CRK;CREBL2;PLCL2;SLIT3;SLIT1;TWSG1;CNTNAP2;FGR;UNC5D;VAV1;VAV2;MTOR;ARHGAP9;ARHGAP21;ARHGAP23;CNTNAP5;TSPAN8;TNR;RTN4RL1;TNFRSF21;ARHGAP35;GSK3B;AXIN1;NR5A1;GABBR1;ANAPC1;GFRA3;GNAL;IGFBP7;NRP1;IQGAP1;RBPJ;INHA;NOTCH2NLA;RASAL2;CADM4;SOCS5;RAPGEF2;DUSP16;WNT5B;ANAPC2;NTN1;TSPAN1;DDR2;GPR143;OC90;OPRD1;MYCL;MYLK | 0.0015708 |
| WNT Signaling Activation by Blocking of Tumor Suppressors               | 39            | 8       | 9               | GSK3B;AXIN1;TCF4;DVL3;WNT5B;GPC3;LRP6;FAT1                                                                                                                                                                                                                                                                                                                                                                                                                                                       | 0.0015828 |
| Bone Loss in Osteoporosis                                               | 55            | 7       | 11              | SMURF1;GSK3B;AXIN1;PTH1R;BMPR1A;LRP6;SMAD2                                                                                                                                                                                                                                                                                                                                                                                                                                                       | 0.0017379 |
| Circadian Clock in Sleep Regulation                                     | 32            | 6       | 10              | GRM5;PPP3CA;ITPR1;PLCH1;CRY1;PLCL2                                                                                                                                                                                                                                                                                                                                                                                                                                                               | 0.0017888 |
| Bone Resorption in Hyperparathyroidism                                  | 27            | 5       | 14              | GSK3B;AXIN1;PTH1R;BMPR1A;LRP6                                                                                                                                                                                                                                                                                                                                                                                                                                                                    | 0.0026195 |
| Frizzled Receptors -> ARRB1/ARRB2 Canonical Signaling                   | 18            | 6       | 14              | ARRB1;GSK3B;AXIN1;TCF4;WNT5B;LRP6                                                                                                                                                                                                                                                                                                                                                                                                                                                                | 0.0028815 |
| Apoptosis Evasion in Cancer: Overview                                   | 118           | 12      | 6               | NGFR;WWOX;TNFRSF21;SPTAN1;DCC;CAPN7;MAP2K7;MAP2K4;CASP9;LMNB1;TP73;NTN1                                                                                                                                                                                                                                                                                                                                                                                                                          | 0.0028925 |
| GRM1/5 (Postsynaptic) -> Ion Channels                                   | 35            | 7       | 8               | GRM5;ITPR1;PLCH1;KCNJ6;ADCY8;CACNA1B;PLCL2                                                                                                                                                                                                                                                                                                                                                                                                                                                       | 0.0029423 |
| Metabolic Effects of Oncogenes and Tumor Suppressor in Cancer Cells     | 83            | 8       | 8               | GSK3B;TCF4;ACACA;PDK3;EPAS1;SLC1A5;GLS;GLS2                                                                                                                                                                                                                                                                                                                                                                                                                                                      | 0.0029663 |
| Hyperparathyroidism, Secondary Effect                                   | 44            | 6       | 11              | GSK3B;AXIN1;PTH1R;BMPR1A;LRP6;SMAD2                                                                                                                                                                                                                                                                                                                                                                                                                                                              | 0.0030382 |
| mTOR Signaling Activation by Amino Acids                                | 81            | 9       | 7               | GSK3B;ATP6AP1;RPTOR;MTOR;CDW12;SLC1A5;FNIP1;GLS;GLS2                                                                                                                                                                                                                                                                                                                                                                                                                                             | 0.0030743 |
| Norepinephrine Release Regulation                                       | 57            | 7       | 8               | MAOB;CPLX1;ITPR1;ADCY8;CACNA2D2;UNC13B;SNAP25                                                                                                                                                                                                                                                                                                                                                                                                                                                    | 0.0031541 |
